# Supplementary material for: Predicting Spatial and Temporal Gene Expression Using an Integrative Model of Transcription Factor Occupancy and Chromatin State
Source: PLoS Comput Biol. 2012 Dec 6;8(12):e1002798. doi: 10.1371/journal.pcbi.1002798 (PMC3516547; doi:10.1371/journal.pcbi.1002798)
Supplement: Dataset S2 — Distances (<100 000) between transcriptional start sites of 14689 genes and all 8008 CRMs including count of insulator peaks in-between them. (XLS) [file pcbi.1002798.s002.xls]

gene CRM distance #insulators #insulator types
FBgn0000003	1685	86507.5	55	6
FBgn0000003	1686	80441	54	6
FBgn0000003	1687	71949	54	6
FBgn0000003	1688	70842	54	6
FBgn0000003	1689	70325	54	6
FBgn0000003	1690	68254	54	6
FBgn0000003	1691	66828	54	6
FBgn0000003	1692	61955	41	6
FBgn0000003	1693	60903	38	6
FBgn0000003	1694	59730	36	6
FBgn0000003	1695	59372	36	6
FBgn0000003	1696	55308	34	6
FBgn0000003	1697	42231	28	6
FBgn0000003	1698	30816	22	6
FBgn0000003	1699	11656	13	3
FBgn0000003	1700	9466	11	3
FBgn0000003	1701	4326	6	3
FBgn0000003	1702	3067	4	2
FBgn0000003	1703	2515	3	2
FBgn0000003	1704	2131	1	1
FBgn0000003	1705	1418	0	0
FBgn0000003	1706	120	0	0
FBgn0000003	1707	-7968	0	0
FBgn0000003	1708	-23480.5	0	0
FBgn0000003	1709	-24444.5	0	0
FBgn0000003	1710	-26308	2	2
FBgn0000003	1711	-31228	4	2
FBgn0000003	1712	-32023	5	3
FBgn0000003	1713	-41538	9	5
FBgn0000003	1714	-43342	9	5
FBgn0000003	1715	-43543	9	5
FBgn0000003	1716	-45878	9	5
FBgn0000003	1717	-48629.5	15	5
FBgn0000003	1718	-59398	16	5
FBgn0000003	1719	-62923	16	5
FBgn0000003	1720	-70843.5	16	5
FBgn0000003	1721	-81146.5	18	5
FBgn0000003	1722	-85082	19	5
FBgn0000003	1723	-89841	28	6
FBgn0000003	1724	-90634.5	30	6
FBgn0000008	1276	25175	16	4
FBgn0000008	1277	17253	16	4
FBgn0000008	1278	16733	16	4
FBgn0000008	1279	16385.5	16	4
FBgn0000008	1280	14389	12	4
FBgn0000008	1281	-28067.5	4	3
FBgn0000008	1282	-45791	8	5
FBgn0000008	1283	-49036	15	5
FBgn0000008	1284	-60755	16	5
FBgn0000008	1285	-76041	20	6
FBgn0000008	1286	-76731	22	6
FBgn0000008	1276	25617	17	5
FBgn0000008	1277	17695	17	5
FBgn0000008	1278	17175	17	5
FBgn0000008	1279	16827.5	17	5
FBgn0000008	1280	14831	13	5
FBgn0000008	1281	-27625.5	3	3
FBgn0000008	1282	-45349	7	5
FBgn0000008	1283	-48594	14	5
FBgn0000008	1284	-60313	15	5
FBgn0000008	1285	-75599	19	6
FBgn0000008	1286	-76289	21	6
FBgn0000008	1276	25173	16	4
FBgn0000008	1277	17251	16	4
FBgn0000008	1278	16731	16	4
FBgn0000008	1279	16383.5	16	4
FBgn0000008	1280	14387	12	4
FBgn0000008	1281	-28069.5	4	3
FBgn0000008	1282	-45793	8	5
FBgn0000008	1283	-49038	15	5
FBgn0000008	1284	-60757	16	5
FBgn0000008	1285	-76043	20	6
FBgn0000008	1286	-76733	22	6
FBgn0000014	2494	-95551.5	35	6
FBgn0000014	2495	-92793	34	6
FBgn0000014	2496	-86638	34	6
FBgn0000014	2497	-85517.5	34	6
FBgn0000014	2498	-84714	34	6
FBgn0000014	2499	-84499	34	6
FBgn0000014	2500	-79787.5	27	6
FBgn0000014	2501	-73784.5	27	6
FBgn0000014	2502	-67343	27	6
FBgn0000014	2503	-66139	27	6
FBgn0000014	2504	-65744	25	6
FBgn0000014	2505	-64214	25	6
FBgn0000014	2506	-59154.5	25	6
FBgn0000014	2507	-57924	25	6
FBgn0000014	2508	-57600.5	25	6
FBgn0000014	2509	-56811	25	6
FBgn0000014	2510	-46892	22	6
FBgn0000014	2511	-46014	20	6
FBgn0000014	2512	-31365	14	6
FBgn0000014	2513	-27515	1	1
FBgn0000014	2514	-27110.5	1	1
FBgn0000014	2515	-18008.5	1	1
FBgn0000014	2516	-17205	0	0
FBgn0000014	2517	-16593	0	0
FBgn0000014	2518	-15621	0	0
FBgn0000014	2519	-7865	0	0
FBgn0000014	2520	-3687	0	0
FBgn0000014	2521	-1952	0	0
FBgn0000014	2522	272	1	1
FBgn0000014	2523	11521.5	8	5
FBgn0000014	2524	12091	8	5
FBgn0000014	2525	19940	11	5
FBgn0000014	2526	27862	26	5
FBgn0000014	2527	31251	29	5
FBgn0000014	2528	36524.5	29	5
FBgn0000014	2529	39534	35	5
FBgn0000014	2530	44066	42	5
FBgn0000014	2531	48969	43	5
FBgn0000014	2532	52570	43	5
FBgn0000014	2533	56472	47	5
FBgn0000014	2534	62303	47	5
FBgn0000014	2535	65997	47	5
FBgn0000014	2536	69705.5	54	5
FBgn0000014	2537	75047.5	56	5
FBgn0000014	2538	80647	56	5
FBgn0000014	2539	83650.5	56	5
FBgn0000014	2540	90605.5	68	5
FBgn0000014	2541	91342	68	5
FBgn0000014	2493	-99912	36	6
FBgn0000014	2494	-93520.5	35	6
FBgn0000014	2495	-90762	34	6
FBgn0000014	2496	-84607	34	6
FBgn0000014	2497	-83486.5	34	6
FBgn0000014	2498	-82683	34	6
FBgn0000014	2499	-82468	34	6
FBgn0000014	2500	-77756.5	27	6
FBgn0000014	2501	-71753.5	27	6
FBgn0000014	2502	-65312	27	6
FBgn0000014	2503	-64108	27	6
FBgn0000014	2504	-63713	25	6
FBgn0000014	2505	-62183	25	6
FBgn0000014	2506	-57123.5	25	6
FBgn0000014	2507	-55893	25	6
FBgn0000014	2508	-55569.5	25	6
FBgn0000014	2509	-54780	25	6
FBgn0000014	2510	-44861	22	6
FBgn0000014	2511	-43983	20	6
FBgn0000014	2512	-29334	14	6
FBgn0000014	2513	-25484	1	1
FBgn0000014	2514	-25079.5	1	1
FBgn0000014	2515	-15977.5	1	1
FBgn0000014	2516	-15174	0	0
FBgn0000014	2517	-14562	0	0
FBgn0000014	2518	-13590	0	0
FBgn0000014	2519	-5834	0	0
FBgn0000014	2520	-1656	0	0
FBgn0000014	2521	79	0	0
FBgn0000014	2522	2303	1	1
FBgn0000014	2523	13552.5	8	5
FBgn0000014	2524	14122	8	5
FBgn0000014	2525	21971	11	5
FBgn0000014	2526	29893	26	5
FBgn0000014	2527	33282	29	5
FBgn0000014	2528	38555.5	29	5
FBgn0000014	2529	41565	35	5
FBgn0000014	2530	46097	42	5
FBgn0000014	2531	51000	43	5
FBgn0000014	2532	54601	43	5
FBgn0000014	2533	58503	47	5
FBgn0000014	2534	64334	47	5
FBgn0000014	2535	68028	47	5
FBgn0000014	2536	71736.5	54	5
FBgn0000014	2537	77078.5	56	5
FBgn0000014	2538	82678	56	5
FBgn0000014	2539	85681.5	56	5
FBgn0000014	2540	92636.5	68	5
FBgn0000014	2541	93373	68	5
FBgn0000014	2494	-95544.5	35	6
FBgn0000014	2495	-92786	34	6
FBgn0000014	2496	-86631	34	6
FBgn0000014	2497	-85510.5	34	6
FBgn0000014	2498	-84707	34	6
FBgn0000014	2499	-84492	34	6
FBgn0000014	2500	-79780.5	27	6
FBgn0000014	2501	-73777.5	27	6
FBgn0000014	2502	-67336	27	6
FBgn0000014	2503	-66132	27	6
FBgn0000014	2504	-65737	25	6
FBgn0000014	2505	-64207	25	6
FBgn0000014	2506	-59147.5	25	6
FBgn0000014	2507	-57917	25	6
FBgn0000014	2508	-57593.5	25	6
FBgn0000014	2509	-56804	25	6
FBgn0000014	2510	-46885	22	6
FBgn0000014	2511	-46007	20	6
FBgn0000014	2512	-31358	14	6
FBgn0000014	2513	-27508	1	1
FBgn0000014	2514	-27103.5	1	1
FBgn0000014	2515	-18001.5	1	1
FBgn0000014	2516	-17198	0	0
FBgn0000014	2517	-16586	0	0
FBgn0000014	2518	-15614	0	0
FBgn0000014	2519	-7858	0	0
FBgn0000014	2520	-3680	0	0
FBgn0000014	2521	-1945	0	0
FBgn0000014	2522	279	1	1
FBgn0000014	2523	11528.5	8	5
FBgn0000014	2524	12098	8	5
FBgn0000014	2525	19947	11	5
FBgn0000014	2526	27869	26	5
FBgn0000014	2527	31258	29	5
FBgn0000014	2528	36531.5	29	5
FBgn0000014	2529	39541	35	5
FBgn0000014	2530	44073	42	5
FBgn0000014	2531	48976	43	5
FBgn0000014	2532	52577	43	5
FBgn0000014	2533	56479	47	5
FBgn0000014	2534	62310	47	5
FBgn0000014	2535	66004	47	5
FBgn0000014	2536	69712.5	54	5
FBgn0000014	2537	75054.5	56	5
FBgn0000014	2538	80654	56	5
FBgn0000014	2539	83657.5	56	5
FBgn0000014	2540	90612.5	68	5
FBgn0000014	2541	91349	68	5
FBgn0000015	2528	-97373.5	62	5
FBgn0000015	2529	-94364	56	5
FBgn0000015	2530	-89832	49	5
FBgn0000015	2531	-84929	48	5
FBgn0000015	2532	-81328	48	5
FBgn0000015	2533	-77426	44	5
FBgn0000015	2534	-71595	44	5
FBgn0000015	2535	-67901	44	5
FBgn0000015	2536	-64192.5	37	5
FBgn0000015	2537	-58850.5	35	5
FBgn0000015	2538	-53251	35	5
FBgn0000015	2539	-50247.5	35	5
FBgn0000015	2540	-43292.5	23	5
FBgn0000015	2541	-42556	23	5
FBgn0000015	2542	-29460.5	15	5
FBgn0000015	2543	-25738.5	10	5
FBgn0000015	2544	-15114	10	5
FBgn0000015	2545	-10805	9	5
FBgn0000015	2546	-8116	9	5
FBgn0000015	2547	-3451	1	1
FBgn0000015	2548	5698.5	0	0
FBgn0000015	2549	5963	1	1
FBgn0000015	2550	6291	4	4
FBgn0000015	2551	17199	7	4
FBgn0000015	2552	48956	36	7
FBgn0000015	2553	88813	45	7
FBgn0000015	2554	90065	45	7
FBgn0000015	2555	90270	47	7
FBgn0000015	2556	92718	53	7
FBgn0000015	2527	-99208	61	5
FBgn0000015	2528	-93934.5	61	5
FBgn0000015	2529	-90925	55	5
FBgn0000015	2530	-86393	48	5
FBgn0000015	2531	-81490	47	5
FBgn0000015	2532	-77889	47	5
FBgn0000015	2533	-73987	43	5
FBgn0000015	2534	-68156	43	5
FBgn0000015	2535	-64462	43	5
FBgn0000015	2536	-60753.5	36	5
FBgn0000015	2537	-55411.5	34	5
FBgn0000015	2538	-49812	34	5
FBgn0000015	2539	-46808.5	34	5
FBgn0000015	2540	-39853.5	22	5
FBgn0000015	2541	-39117	22	5
FBgn0000015	2542	-26021.5	14	5
FBgn0000015	2543	-22299.5	9	4
FBgn0000015	2544	-11675	9	4
FBgn0000015	2545	-7366	8	4
FBgn0000015	2546	-4677	8	4
FBgn0000015	2547	-12	0	0
FBgn0000015	2548	9137.5	1	1
FBgn0000015	2549	9402	2	2
FBgn0000015	2550	9730	5	5
FBgn0000015	2551	20638	8	5
FBgn0000015	2552	52395	37	7
FBgn0000015	2553	92252	46	7
FBgn0000015	2554	93504	46	7
FBgn0000015	2555	93709	48	7
FBgn0000015	2556	96157	54	7
FBgn0000015	2525	-94282	70	5
FBgn0000015	2526	-86360	55	5
FBgn0000015	2527	-82971	52	5
FBgn0000015	2528	-77697.5	52	5
FBgn0000015	2529	-74688	46	5
FBgn0000015	2530	-70156	39	5
FBgn0000015	2531	-65253	38	5
FBgn0000015	2532	-61652	38	5
FBgn0000015	2533	-57750	34	5
FBgn0000015	2534	-51919	34	5
FBgn0000015	2535	-48225	34	5
FBgn0000015	2536	-44516.5	27	5
FBgn0000015	2537	-39174.5	25	5
FBgn0000015	2538	-33575	25	5
FBgn0000015	2539	-30571.5	25	5
FBgn0000015	2540	-23616.5	13	4
FBgn0000015	2541	-22880	13	4
FBgn0000015	2542	-9784.5	5	4
FBgn0000015	2543	-6062.5	0	0
FBgn0000015	2544	4562	0	0
FBgn0000015	2545	8871	1	1
FBgn0000015	2546	11560	1	1
FBgn0000015	2547	16225	9	4
FBgn0000015	2548	25374.5	10	5
FBgn0000015	2549	25639	11	5
FBgn0000015	2550	25967	14	5
FBgn0000015	2551	36875	17	5
FBgn0000015	2552	68632	46	7
FBgn0000015	2523	-93007.5	68	5
FBgn0000015	2524	-92438	68	5
FBgn0000015	2525	-84589	65	5
FBgn0000015	2526	-76667	50	5
FBgn0000015	2527	-73278	47	5
FBgn0000015	2528	-68004.5	47	5
FBgn0000015	2529	-64995	41	5
FBgn0000015	2530	-60463	34	5
FBgn0000015	2531	-55560	33	5
FBgn0000015	2532	-51959	33	5
FBgn0000015	2533	-48057	29	5
FBgn0000015	2534	-42226	29	5
FBgn0000015	2535	-38532	29	5
FBgn0000015	2536	-34823.5	22	5
FBgn0000015	2537	-29481.5	20	5
FBgn0000015	2538	-23882	20	5
FBgn0000015	2539	-20878.5	20	5
FBgn0000015	2540	-13923.5	8	4
FBgn0000015	2541	-13187	8	4
FBgn0000015	2542	-91.5	0	0
FBgn0000015	2543	3630.5	5	4
FBgn0000015	2544	14255	5	4
FBgn0000015	2545	18564	6	5
FBgn0000015	2546	21253	6	5
FBgn0000015	2547	25918	14	5
FBgn0000015	2548	35067.5	15	5
FBgn0000015	2549	35332	16	5
FBgn0000015	2550	35660	19	5
FBgn0000015	2551	46568	22	5
FBgn0000015	2552	78325	51	7
FBgn0000015	2530	-98123	53	5
FBgn0000015	2531	-93220	52	5
FBgn0000015	2532	-89619	52	5
FBgn0000015	2533	-85717	48	5
FBgn0000015	2534	-79886	48	5
FBgn0000015	2535	-76192	48	5
FBgn0000015	2536	-72483.5	41	5
FBgn0000015	2537	-67141.5	39	5
FBgn0000015	2538	-61542	39	5
FBgn0000015	2539	-58538.5	39	5
FBgn0000015	2540	-51583.5	27	5
FBgn0000015	2541	-50847	27	5
FBgn0000015	2542	-37751.5	19	5
FBgn0000015	2543	-34029.5	14	5
FBgn0000015	2544	-23405	14	5
FBgn0000015	2545	-19096	13	5
FBgn0000015	2546	-16407	13	5
FBgn0000015	2547	-11742	5	5
FBgn0000015	2548	-2592.5	4	4
FBgn0000015	2549	-2328	3	3
FBgn0000015	2550	-2000	0	0
FBgn0000015	2551	8908	3	1
FBgn0000015	2552	40665	32	6
FBgn0000015	2553	80522	41	7
FBgn0000015	2554	81774	41	7
FBgn0000015	2555	81979	43	7
FBgn0000015	2556	84427	49	7
FBgn0000015	2557	95639.5	56	7
FBgn0000015	2558	96622	56	7
FBgn0000017	4706	-81185.5	49	6
FBgn0000017	4707	-79228	49	6
FBgn0000017	4708	-66972.5	39	6
FBgn0000017	4709	-60194	31	6
FBgn0000017	4710	-6738	9	6
FBgn0000017	4711	12355	1	1
FBgn0000017	4712	13241.5	7	7
FBgn0000017	4713	19069	13	7
FBgn0000017	4714	52840	17	7
FBgn0000017	4715	54169	17	7
FBgn0000017	4716	54611	17	7
FBgn0000017	4717	55274	17	7
FBgn0000017	4718	59641	19	7
FBgn0000017	4719	60450.5	19	7
FBgn0000017	4720	63989	26	7
FBgn0000017	4706	-81185.5	49	6
FBgn0000017	4707	-79228	49	6
FBgn0000017	4708	-66972.5	39	6
FBgn0000017	4709	-60194	31	6
FBgn0000017	4710	-6738	9	6
FBgn0000017	4711	12355	1	1
FBgn0000017	4712	13241.5	7	7
FBgn0000017	4713	19069	13	7
FBgn0000017	4714	52840	17	7
FBgn0000017	4715	54169	17	7
FBgn0000017	4716	54611	17	7
FBgn0000017	4717	55274	17	7
FBgn0000017	4718	59641	19	7
FBgn0000017	4719	60450.5	19	7
FBgn0000017	4720	63989	26	7
FBgn0000018	5867	-4810	0	0
FBgn0000018	5868	25974	29	5
FBgn0000018	5869	38999	39	6
FBgn0000018	5870	70089	42	7
FBgn0000018	5871	86086	45	7
FBgn0000018	5872	95689	48	7
FBgn0000022	6642	93687	28	7
FBgn0000022	6643	93413	27	7
FBgn0000022	6644	91924	27	7
FBgn0000022	6645	90575.5	22	7
FBgn0000022	6646	8431	5	5
FBgn0000022	6647	-39210	6	5
FBgn0000022	6648	-39414	6	5
FBgn0000022	6649	-39727	6	5
FBgn0000022	6650	-42200	6	5
FBgn0000022	6651	-42573	6	5
FBgn0000022	6652	-83330	12	6
FBgn0000022	6653	-85234	12	6
FBgn0000022	6654	-87205.5	12	6
FBgn0000022	6655	-88810	13	6
FBgn0000022	6656	-94007	13	6
FBgn0000022	6657	-95487	13	6
FBgn0000024	2179	-44194	4	4
FBgn0000024	2180	34760	11	4
FBgn0000024	2179	-44844	5	4
FBgn0000024	2180	34110	10	4
FBgn0000028	7602	-59057	45	7
FBgn0000028	7603	-58280	45	7
FBgn0000028	7604	-55197	37	7
FBgn0000028	7605	-45182	30	7
FBgn0000028	7606	-8180.5	0	0
FBgn0000028	7607	71231	15	6
FBgn0000028	7608	71973	18	6
FBgn0000028	7609	84189	23	7
FBgn0000028	7602	-59057	45	7
FBgn0000028	7603	-58280	45	7
FBgn0000028	7604	-55197	37	7
FBgn0000028	7605	-45182	30	7
FBgn0000028	7606	-8180.5	0	0
FBgn0000028	7607	71231	15	6
FBgn0000028	7608	71973	18	6
FBgn0000028	7609	84189	23	7
FBgn0000028	7602	-59057	45	7
FBgn0000028	7603	-58280	45	7
FBgn0000028	7604	-55197	37	7
FBgn0000028	7605	-45182	30	7
FBgn0000028	7606	-8180.5	0	0
FBgn0000028	7607	71231	15	6
FBgn0000028	7608	71973	18	6
FBgn0000028	7609	84189	23	7
FBgn0000028	7602	-59057	45	7
FBgn0000028	7603	-58280	45	7
FBgn0000028	7604	-55197	37	7
FBgn0000028	7605	-45182	30	7
FBgn0000028	7606	-8180.5	0	0
FBgn0000028	7607	71231	15	6
FBgn0000028	7608	71973	18	6
FBgn0000028	7609	84189	23	7
FBgn0000028	7602	-59057	45	7
FBgn0000028	7603	-58280	45	7
FBgn0000028	7604	-55197	37	7
FBgn0000028	7605	-45182	30	7
FBgn0000028	7606	-8180.5	0	0
FBgn0000028	7607	71231	15	6
FBgn0000028	7608	71973	18	6
FBgn0000028	7609	84189	23	7
FBgn0000032	3356	-99153	23	7
FBgn0000032	3357	-78923	14	5
FBgn0000032	3358	-57480	10	5
FBgn0000032	3359	11515.5	17	5
FBgn0000032	3360	28691.5	21	5
FBgn0000032	3361	47695	36	7
FBgn0000032	3362	52914	42	7
FBgn0000032	3363	56516	47	7
FBgn0000032	3364	64945	59	7
FBgn0000032	3365	66668.5	63	7
FBgn0000032	3366	98898	91	7
FBgn0000032	3367	99953	91	7
FBgn0000032	3356	-99021	22	7
FBgn0000032	3357	-78791	13	5
FBgn0000032	3358	-57348	9	5
FBgn0000032	3359	11647.5	18	5
FBgn0000032	3360	28823.5	22	5
FBgn0000032	3361	47827	37	7
FBgn0000032	3362	53046	43	7
FBgn0000032	3363	56648	48	7
FBgn0000032	3364	65077	60	7
FBgn0000032	3365	66800.5	64	7
FBgn0000032	3366	99030	92	7
FBgn0000036	3074	21563	9	4
FBgn0000036	3075	87703	25	7
FBgn0000036	3076	99216	26	7
FBgn0000037	1440	-95572	48	7
FBgn0000037	1441	-84868	28	7
FBgn0000037	1442	-83893	28	7
FBgn0000037	1443	-80370.5	28	7
FBgn0000037	1444	-79865	28	7
FBgn0000037	1445	-79540	28	7
FBgn0000037	1446	-66257	24	7
FBgn0000037	1447	-61343	24	7
FBgn0000037	1448	-48893	15	7
FBgn0000037	1449	-45782.5	9	5
FBgn0000037	1450	54454	19	7
FBgn0000037	1440	-95572	48	7
FBgn0000037	1441	-84868	28	7
FBgn0000037	1442	-83893	28	7
FBgn0000037	1443	-80370.5	28	7
FBgn0000037	1444	-79865	28	7
FBgn0000037	1445	-79540	28	7
FBgn0000037	1446	-66257	24	7
FBgn0000037	1447	-61343	24	7
FBgn0000037	1448	-48893	15	7
FBgn0000037	1449	-45782.5	9	5
FBgn0000037	1450	54454	19	7
FBgn0000038	3871	91733	38	6
FBgn0000038	3872	78357	37	6
FBgn0000038	3873	41154	17	6
FBgn0000038	3874	23319	13	5
FBgn0000038	3875	22412	12	5
FBgn0000038	3876	20119.5	10	4
FBgn0000038	3877	19831	10	4
FBgn0000038	3878	17501.5	6	4
FBgn0000038	3879	-17392	3	1
FBgn0000038	3871	91741	38	6
FBgn0000038	3872	78365	37	6
FBgn0000038	3873	41162	17	6
FBgn0000038	3874	23327	13	5
FBgn0000038	3875	22420	12	5
FBgn0000038	3876	20127.5	10	4
FBgn0000038	3877	19839	10	4
FBgn0000038	3878	17509.5	6	4
FBgn0000038	3879	-17384	3	1
FBgn0000039	3074	6950	0	0
FBgn0000039	3075	-59190	16	7
FBgn0000039	3076	-70703	17	7
FBgn0000039	3077	-71643.5	24	7
FBgn0000039	3078	-85979	27	7
FBgn0000039	3079	-86701.5	28	7
FBgn0000039	3074	7045	0	0
FBgn0000039	3075	-59095	16	7
FBgn0000039	3076	-70608	17	7
FBgn0000039	3077	-71548.5	24	7
FBgn0000039	3078	-85884	27	7
FBgn0000039	3079	-86606.5	28	7
FBgn0000042	7050	99525	29	7
FBgn0000042	7051	20503.5	15	7
FBgn0000042	7052	13717	3	2
FBgn0000042	7053	12551	2	2
FBgn0000042	7054	12132	2	2
FBgn0000042	7055	10813	2	2
FBgn0000042	7056	9773	2	2
FBgn0000042	7057	5759	2	2
FBgn0000042	7058	5464.5	2	2
FBgn0000042	7059	4488.5	2	2
FBgn0000042	7060	1323.5	2	2
FBgn0000042	7061	774	2	2
FBgn0000042	7062	436	1	1
FBgn0000042	7063	-948	1	1
FBgn0000042	7064	-16295	17	6
FBgn0000042	7065	-63751	43	7
FBgn0000042	7066	-65196	48	7
FBgn0000042	7067	-66197	49	7
FBgn0000042	7068	-67667	49	7
FBgn0000042	7069	-69202	49	7
FBgn0000042	7070	-69767.5	49	7
FBgn0000042	7071	-71273.5	49	7
FBgn0000042	7072	-94099	54	7
FBgn0000042	7051	21619.5	16	7
FBgn0000042	7052	14833	4	3
FBgn0000042	7053	13667	3	3
FBgn0000042	7054	13248	3	3
FBgn0000042	7055	11929	3	3
FBgn0000042	7056	10889	3	3
FBgn0000042	7057	6875	3	3
FBgn0000042	7058	6580.5	3	3
FBgn0000042	7059	5604.5	3	3
FBgn0000042	7060	2439.5	3	3
FBgn0000042	7061	1890	3	3
FBgn0000042	7062	1552	2	2
FBgn0000042	7063	168	0	0
FBgn0000042	7064	-15179	16	6
FBgn0000042	7065	-62635	42	7
FBgn0000042	7066	-64080	47	7
FBgn0000042	7067	-65081	48	7
FBgn0000042	7068	-66551	48	7
FBgn0000042	7069	-68086	48	7
FBgn0000042	7070	-68651.5	48	7
FBgn0000042	7071	-70157.5	48	7
FBgn0000042	7072	-92983	53	7
FBgn0000042	7073	-99112	54	7
FBgn0000042	7050	99525	29	7
FBgn0000042	7051	20503.5	15	7
FBgn0000042	7052	13717	3	2
FBgn0000042	7053	12551	2	2
FBgn0000042	7054	12132	2	2
FBgn0000042	7055	10813	2	2
FBgn0000042	7056	9773	2	2
FBgn0000042	7057	5759	2	2
FBgn0000042	7058	5464.5	2	2
FBgn0000042	7059	4488.5	2	2
FBgn0000042	7060	1323.5	2	2
FBgn0000042	7061	774	2	2
FBgn0000042	7062	436	1	1
FBgn0000042	7063	-948	1	1
FBgn0000042	7064	-16295	17	6
FBgn0000042	7065	-63751	43	7
FBgn0000042	7066	-65196	48	7
FBgn0000042	7067	-66197	49	7
FBgn0000042	7068	-67667	49	7
FBgn0000042	7069	-69202	49	7
FBgn0000042	7070	-69767.5	49	7
FBgn0000042	7071	-71273.5	49	7
FBgn0000042	7072	-94099	54	7
FBgn0000042	7050	99525	29	7
FBgn0000042	7051	20503.5	15	7
FBgn0000042	7052	13717	3	2
FBgn0000042	7053	12551	2	2
FBgn0000042	7054	12132	2	2
FBgn0000042	7055	10813	2	2
FBgn0000042	7056	9773	2	2
FBgn0000042	7057	5759	2	2
FBgn0000042	7058	5464.5	2	2
FBgn0000042	7059	4488.5	2	2
FBgn0000042	7060	1323.5	2	2
FBgn0000042	7061	774	2	2
FBgn0000042	7062	436	1	1
FBgn0000042	7063	-948	1	1
FBgn0000042	7064	-16295	17	6
FBgn0000042	7065	-63751	43	7
FBgn0000042	7066	-65196	48	7
FBgn0000042	7067	-66197	49	7
FBgn0000042	7068	-67667	49	7
FBgn0000042	7069	-69202	49	7
FBgn0000042	7070	-69767.5	49	7
FBgn0000042	7071	-71273.5	49	7
FBgn0000042	7072	-94099	54	7
FBgn0000043	16	-80400	18	5
FBgn0000043	17	-78185	18	5
FBgn0000043	18	-76998	18	5
FBgn0000043	19	-47841.5	15	5
FBgn0000043	20	-30235.5	5	2
FBgn0000043	21	-8323	1	1
FBgn0000043	22	248	4	4
FBgn0000043	23	17143	11	5
FBgn0000043	24	40942	29	5
FBgn0000043	25	73663	38	5
FBgn0000043	26	89587	39	6
FBgn0000044	1179	84345	55	7
FBgn0000044	1180	36451	27	7
FBgn0000044	1181	5196.5	9	5
FBgn0000044	1182	4755	8	5
FBgn0000044	1183	4550	8	5
FBgn0000044	1184	3435	7	5
FBgn0000044	1185	1043.5	7	5
FBgn0000044	1186	289.5	2	2
FBgn0000044	1187	-2670.5	2	2
FBgn0000044	1188	-5242.5	5	4
FBgn0000044	1189	-7763	5	4
FBgn0000044	1190	-17034	6	4
FBgn0000044	1191	-17394	6	4
FBgn0000044	1192	-52256	26	7
FBgn0000044	1193	-52575	30	7
FBgn0000044	1194	-53346	30	7
FBgn0000044	1195	-54240	34	7
FBgn0000044	1196	-54666	34	7
FBgn0000044	1197	-55070.5	34	7
FBgn0000044	1198	-55965	36	7
FBgn0000044	1199	-56449	36	7
FBgn0000044	1200	-84509.5	48	7
FBgn0000044	1201	-85175	48	7
FBgn0000044	1202	-93023.5	48	7
FBgn0000044	1203	-93511	48	7
FBgn0000044	1204	-94049	48	7
FBgn0000044	1205	-94287	48	7
FBgn0000044	1179	84345	55	7
FBgn0000044	1180	36451	27	7
FBgn0000044	1181	5196.5	9	5
FBgn0000044	1182	4755	8	5
FBgn0000044	1183	4550	8	5
FBgn0000044	1184	3435	7	5
FBgn0000044	1185	1043.5	7	5
FBgn0000044	1186	289.5	2	2
FBgn0000044	1187	-2670.5	2	2
FBgn0000044	1188	-5242.5	5	4
FBgn0000044	1189	-7763	5	4
FBgn0000044	1190	-17034	6	4
FBgn0000044	1191	-17394	6	4
FBgn0000044	1192	-52256	26	7
FBgn0000044	1193	-52575	30	7
FBgn0000044	1194	-53346	30	7
FBgn0000044	1195	-54240	34	7
FBgn0000044	1196	-54666	34	7
FBgn0000044	1197	-55070.5	34	7
FBgn0000044	1198	-55965	36	7
FBgn0000044	1199	-56449	36	7
FBgn0000044	1200	-84509.5	48	7
FBgn0000044	1201	-85175	48	7
FBgn0000044	1202	-93023.5	48	7
FBgn0000044	1203	-93511	48	7
FBgn0000044	1204	-94049	48	7
FBgn0000044	1205	-94287	48	7
FBgn0000045	5073	98021	43	7
FBgn0000045	5074	96838	43	7
FBgn0000045	5075	30237.5	21	5
FBgn0000045	5076	26933	10	4
FBgn0000045	5077	24470	1	1
FBgn0000045	5078	23235	1	1
FBgn0000045	5079	-21108	0	0
FBgn0000045	5080	-66542.5	1	1
FBgn0000045	5081	-81735	4	4
FBgn0000046	2181	62295	37	7
FBgn0000046	2182	53589	29	7
FBgn0000046	2183	46586	25	7
FBgn0000046	2184	37250	12	6
FBgn0000046	2185	22740	3	2
FBgn0000046	2186	1105	0	0
FBgn0000046	2187	779	0	0
FBgn0000046	2188	191.5	0	0
FBgn0000046	2189	-2729.5	0	0
FBgn0000046	2190	-3880	0	0
FBgn0000046	2191	-14393	9	5
FBgn0000046	2192	-21940	9	5
FBgn0000046	2193	-22334.5	9	5
FBgn0000046	2194	-23140.5	9	5
FBgn0000046	2195	-24557.5	11	6
FBgn0000046	2181	62757	37	7
FBgn0000046	2182	54051	29	7
FBgn0000046	2183	47048	25	7
FBgn0000046	2184	37712	12	6
FBgn0000046	2185	23202	3	2
FBgn0000046	2186	1567	0	0
FBgn0000046	2187	1241	0	0
FBgn0000046	2188	653.5	0	0
FBgn0000046	2189	-2267.5	0	0
FBgn0000046	2190	-3418	0	0
FBgn0000046	2191	-13931	9	5
FBgn0000046	2192	-21478	9	5
FBgn0000046	2193	-21872.5	9	5
FBgn0000046	2194	-22678.5	9	5
FBgn0000046	2195	-24095.5	11	6
FBgn0000047	2370	93748	54	7
FBgn0000047	2371	21656	20	7
FBgn0000047	2372	20624.5	19	7
FBgn0000047	2373	19264	17	7
FBgn0000047	2374	-14541	0	0
FBgn0000047	2375	-20145.5	0	0
FBgn0000047	2376	-37984	10	5
FBgn0000052	5529	-77587	53	7
FBgn0000052	5530	-76709	53	7
FBgn0000052	5531	-73179	52	7
FBgn0000052	5532	-68847.5	50	7
FBgn0000052	5533	-68454	50	7
FBgn0000052	5534	-67489	49	7
FBgn0000052	5535	-67027.5	47	7
FBgn0000052	5536	-65570	44	7
FBgn0000052	5537	-65210	44	7
FBgn0000052	5538	-64379	38	7
FBgn0000052	5539	-63565.5	38	7
FBgn0000052	5540	-58612	27	6
FBgn0000052	5541	-30842.5	11	4
FBgn0000052	5542	-29701	10	4
FBgn0000052	5543	-28259.5	10	4
FBgn0000052	5544	-26078	10	4
FBgn0000052	5545	-21401	6	4
FBgn0000052	5546	28426	28	7
FBgn0000052	5547	29572	32	7
FBgn0000052	5548	30284	33	7
FBgn0000052	5549	30554	33	7
FBgn0000052	5550	33043.5	33	7
FBgn0000052	5551	37185	36	7
FBgn0000052	5552	42568.5	38	7
FBgn0000052	5553	44289	40	7
FBgn0000052	5554	45490	43	7
FBgn0000052	5555	53041	60	7
FBgn0000052	5529	-77587	53	7
FBgn0000052	5530	-76709	53	7
FBgn0000052	5531	-73179	52	7
FBgn0000052	5532	-68847.5	50	7
FBgn0000052	5533	-68454	50	7
FBgn0000052	5534	-67489	49	7
FBgn0000052	5535	-67027.5	47	7
FBgn0000052	5536	-65570	44	7
FBgn0000052	5537	-65210	44	7
FBgn0000052	5538	-64379	38	7
FBgn0000052	5539	-63565.5	38	7
FBgn0000052	5540	-58612	27	6
FBgn0000052	5541	-30842.5	11	4
FBgn0000052	5542	-29701	10	4
FBgn0000052	5543	-28259.5	10	4
FBgn0000052	5544	-26078	10	4
FBgn0000052	5545	-21401	6	4
FBgn0000052	5546	28426	28	7
FBgn0000052	5547	29572	32	7
FBgn0000052	5548	30284	33	7
FBgn0000052	5549	30554	33	7
FBgn0000052	5550	33043.5	33	7
FBgn0000052	5551	37185	36	7
FBgn0000052	5552	42568.5	38	7
FBgn0000052	5553	44289	40	7
FBgn0000052	5554	45490	43	7
FBgn0000052	5555	53041	60	7
FBgn0000052	5529	-77210	53	7
FBgn0000052	5530	-76332	53	7
FBgn0000052	5531	-72802	52	7
FBgn0000052	5532	-68470.5	50	7
FBgn0000052	5533	-68077	50	7
FBgn0000052	5534	-67112	49	7
FBgn0000052	5535	-66650.5	47	7
FBgn0000052	5536	-65193	44	7
FBgn0000052	5537	-64833	44	7
FBgn0000052	5538	-64002	38	7
FBgn0000052	5539	-63188.5	38	7
FBgn0000052	5540	-58235	27	6
FBgn0000052	5541	-30465.5	11	4
FBgn0000052	5542	-29324	10	4
FBgn0000052	5543	-27882.5	10	4
FBgn0000052	5544	-25701	10	4
FBgn0000052	5545	-21024	6	4
FBgn0000052	5546	28803	28	7
FBgn0000052	5547	29949	32	7
FBgn0000052	5548	30661	33	7
FBgn0000052	5549	30931	33	7
FBgn0000052	5550	33420.5	33	7
FBgn0000052	5551	37562	36	7
FBgn0000052	5552	42945.5	38	7
FBgn0000052	5553	44666	40	7
FBgn0000052	5554	45867	43	7
FBgn0000052	5555	53418	60	7
FBgn0000053	5618	-81601	37	6
FBgn0000053	5619	18289	15	4
FBgn0000053	5620	18494	15	4
FBgn0000053	5621	18999	17	4
FBgn0000053	5622	19328	17	4
FBgn0000053	5623	25687	20	6
FBgn0000053	5624	32644	27	6
FBgn0000053	5625	32914	27	6
FBgn0000053	5626	93867	47	7
FBgn0000053	5627	95951	47	7
FBgn0000053	5618	-81601	37	6
FBgn0000053	5619	18289	15	4
FBgn0000053	5620	18494	15	4
FBgn0000053	5621	18999	17	4
FBgn0000053	5622	19328	17	4
FBgn0000053	5623	25687	20	6
FBgn0000053	5624	32644	27	6
FBgn0000053	5625	32914	27	6
FBgn0000053	5626	93867	47	7
FBgn0000053	5627	95951	47	7
FBgn0000054	65	92580	63	7
FBgn0000054	66	88697.5	63	7
FBgn0000054	67	88022	63	7
FBgn0000054	68	87161.5	62	7
FBgn0000054	69	76090.5	59	7
FBgn0000054	70	73697	59	7
FBgn0000054	71	67183	54	7
FBgn0000054	72	62580	53	7
FBgn0000054	73	56196	51	7
FBgn0000054	74	54691.5	51	7
FBgn0000054	75	54455	51	7
FBgn0000054	76	51634	48	7
FBgn0000054	77	49247.5	44	6
FBgn0000054	78	48432	42	6
FBgn0000054	79	32025.5	37	6
FBgn0000054	80	30741	35	6
FBgn0000054	81	29729	32	6
FBgn0000054	82	26145.5	29	6
FBgn0000054	83	10809	21	5
FBgn0000054	84	10472	21	5
FBgn0000054	85	5934	11	5
FBgn0000054	86	165.5	0	0
FBgn0000054	87	-199.5	1	1
FBgn0000054	88	-1121	1	1
FBgn0000054	89	-11339	7	2
FBgn0000054	90	-13666	8	2
FBgn0000054	91	-34476	12	3
FBgn0000054	92	-50059.5	20	6
FBgn0000054	93	-72976.5	31	6
FBgn0000054	94	-77061	31	6
FBgn0000054	95	-78647	31	6
FBgn0000054	96	-79557	31	6
FBgn0000054	97	-87484.5	42	7
FBgn0000054	98	-87860	42	7
FBgn0000054	65	92580	63	7
FBgn0000054	66	88697.5	63	7
FBgn0000054	67	88022	63	7
FBgn0000054	68	87161.5	62	7
FBgn0000054	69	76090.5	59	7
FBgn0000054	70	73697	59	7
FBgn0000054	71	67183	54	7
FBgn0000054	72	62580	53	7
FBgn0000054	73	56196	51	7
FBgn0000054	74	54691.5	51	7
FBgn0000054	75	54455	51	7
FBgn0000054	76	51634	48	7
FBgn0000054	77	49247.5	44	6
FBgn0000054	78	48432	42	6
FBgn0000054	79	32025.5	37	6
FBgn0000054	80	30741	35	6
FBgn0000054	81	29729	32	6
FBgn0000054	82	26145.5	29	6
FBgn0000054	83	10809	21	5
FBgn0000054	84	10472	21	5
FBgn0000054	85	5934	11	5
FBgn0000054	86	165.5	0	0
FBgn0000054	87	-199.5	1	1
FBgn0000054	88	-1121	1	1
FBgn0000054	89	-11339	7	2
FBgn0000054	90	-13666	8	2
FBgn0000054	91	-34476	12	3
FBgn0000054	92	-50059.5	20	6
FBgn0000054	93	-72976.5	31	6
FBgn0000054	94	-77061	31	6
FBgn0000054	95	-78647	31	6
FBgn0000054	96	-79557	31	6
FBgn0000054	97	-87484.5	42	7
FBgn0000054	98	-87860	42	7
FBgn0000054	65	92580	63	7
FBgn0000054	66	88697.5	63	7
FBgn0000054	67	88022	63	7
FBgn0000054	68	87161.5	62	7
FBgn0000054	69	76090.5	59	7
FBgn0000054	70	73697	59	7
FBgn0000054	71	67183	54	7
FBgn0000054	72	62580	53	7
FBgn0000054	73	56196	51	7
FBgn0000054	74	54691.5	51	7
FBgn0000054	75	54455	51	7
FBgn0000054	76	51634	48	7
FBgn0000054	77	49247.5	44	6
FBgn0000054	78	48432	42	6
FBgn0000054	79	32025.5	37	6
FBgn0000054	80	30741	35	6
FBgn0000054	81	29729	32	6
FBgn0000054	82	26145.5	29	6
FBgn0000054	83	10809	21	5
FBgn0000054	84	10472	21	5
FBgn0000054	85	5934	11	5
FBgn0000054	86	165.5	0	0
FBgn0000054	87	-199.5	1	1
FBgn0000054	88	-1121	1	1
FBgn0000054	89	-11339	7	2
FBgn0000054	90	-13666	8	2
FBgn0000054	91	-34476	12	3
FBgn0000054	92	-50059.5	20	6
FBgn0000054	93	-72976.5	31	6
FBgn0000054	94	-77061	31	6
FBgn0000054	95	-78647	31	6
FBgn0000054	96	-79557	31	6
FBgn0000054	97	-87484.5	42	7
FBgn0000054	98	-87860	42	7
FBgn0000055	6084	98092	18	7
FBgn0000055	6085	97121	18	7
FBgn0000055	6086	96874	18	7
FBgn0000055	6087	87836	18	7
FBgn0000055	6088	86554	18	7
FBgn0000055	6089	81617	18	7
FBgn0000055	6090	78753	18	7
FBgn0000055	6091	78285.5	18	7
FBgn0000055	6092	77982	18	7
FBgn0000055	6093	77668	18	7
FBgn0000055	6094	75245	18	7
FBgn0000055	6095	70757	18	7
FBgn0000055	6096	69979	18	7
FBgn0000055	6097	68680	18	7
FBgn0000055	6098	68231	18	7
FBgn0000055	6099	61379	18	7
FBgn0000055	6100	60748	18	7
FBgn0000055	6101	54842	16	7
FBgn0000055	6102	38025	14	6
FBgn0000055	6103	35995	14	6
FBgn0000055	6104	30183.5	10	5
FBgn0000055	6105	26483	4	4
FBgn0000055	6106	16852	0	0
FBgn0000055	6107	16521	0	0
FBgn0000055	6108	15968	0	0
FBgn0000055	6109	5702	0	0
FBgn0000055	6110	-3723	0	0
FBgn0000055	6111	-41253	1	1
FBgn0000055	6112	-58963	1	1
FBgn0000055	6113	-69828	1	1
FBgn0000055	6114	-70314	1	1
FBgn0000055	6115	-72633.5	1	1
FBgn0000055	6116	-74954.5	3	2
FBgn0000055	6117	-75191	3	2
FBgn0000055	6084	98806	18	7
FBgn0000055	6085	97835	18	7
FBgn0000055	6086	97588	18	7
FBgn0000055	6087	88550	18	7
FBgn0000055	6088	87268	18	7
FBgn0000055	6089	82331	18	7
FBgn0000055	6090	79467	18	7
FBgn0000055	6091	78999.5	18	7
FBgn0000055	6092	78696	18	7
FBgn0000055	6093	78382	18	7
FBgn0000055	6094	75959	18	7
FBgn0000055	6095	71471	18	7
FBgn0000055	6096	70693	18	7
FBgn0000055	6097	69394	18	7
FBgn0000055	6098	68945	18	7
FBgn0000055	6099	62093	18	7
FBgn0000055	6100	61462	18	7
FBgn0000055	6101	55556	16	7
FBgn0000055	6102	38739	14	6
FBgn0000055	6103	36709	14	6
FBgn0000055	6104	30897.5	10	5
FBgn0000055	6105	27197	4	4
FBgn0000055	6106	17566	0	0
FBgn0000055	6107	17235	0	0
FBgn0000055	6108	16682	0	0
FBgn0000055	6109	6416	0	0
FBgn0000055	6110	-3009	0	0
FBgn0000055	6111	-40539	1	1
FBgn0000055	6112	-58249	1	1
FBgn0000055	6113	-69114	1	1
FBgn0000055	6114	-69600	1	1
FBgn0000055	6115	-71919.5	1	1
FBgn0000055	6116	-74240.5	3	2
FBgn0000055	6117	-74477	3	2
FBgn0000055	6084	98092	18	7
FBgn0000055	6085	97121	18	7
FBgn0000055	6086	96874	18	7
FBgn0000055	6087	87836	18	7
FBgn0000055	6088	86554	18	7
FBgn0000055	6089	81617	18	7
FBgn0000055	6090	78753	18	7
FBgn0000055	6091	78285.5	18	7
FBgn0000055	6092	77982	18	7
FBgn0000055	6093	77668	18	7
FBgn0000055	6094	75245	18	7
FBgn0000055	6095	70757	18	7
FBgn0000055	6096	69979	18	7
FBgn0000055	6097	68680	18	7
FBgn0000055	6098	68231	18	7
FBgn0000055	6099	61379	18	7
FBgn0000055	6100	60748	18	7
FBgn0000055	6101	54842	16	7
FBgn0000055	6102	38025	14	6
FBgn0000055	6103	35995	14	6
FBgn0000055	6104	30183.5	10	5
FBgn0000055	6105	26483	4	4
FBgn0000055	6106	16852	0	0
FBgn0000055	6107	16521	0	0
FBgn0000055	6108	15968	0	0
FBgn0000055	6109	5702	0	0
FBgn0000055	6110	-3723	0	0
FBgn0000055	6111	-41253	1	1
FBgn0000055	6112	-58963	1	1
FBgn0000055	6113	-69828	1	1
FBgn0000055	6114	-70314	1	1
FBgn0000055	6115	-72633.5	1	1
FBgn0000055	6116	-74954.5	3	2
FBgn0000055	6117	-75191	3	2
FBgn0000055	6084	98806	18	7
FBgn0000055	6085	97835	18	7
FBgn0000055	6086	97588	18	7
FBgn0000055	6087	88550	18	7
FBgn0000055	6088	87268	18	7
FBgn0000055	6089	82331	18	7
FBgn0000055	6090	79467	18	7
FBgn0000055	6091	78999.5	18	7
FBgn0000055	6092	78696	18	7
FBgn0000055	6093	78382	18	7
FBgn0000055	6094	75959	18	7
FBgn0000055	6095	71471	18	7
FBgn0000055	6096	70693	18	7
FBgn0000055	6097	69394	18	7
FBgn0000055	6098	68945	18	7
FBgn0000055	6099	62093	18	7
FBgn0000055	6100	61462	18	7
FBgn0000055	6101	55556	16	7
FBgn0000055	6102	38739	14	6
FBgn0000055	6103	36709	14	6
FBgn0000055	6104	30897.5	10	5
FBgn0000055	6105	27197	4	4
FBgn0000055	6106	17566	0	0
FBgn0000055	6107	17235	0	0
FBgn0000055	6108	16682	0	0
FBgn0000055	6109	6416	0	0
FBgn0000055	6110	-3009	0	0
FBgn0000055	6111	-40539	1	1
FBgn0000055	6112	-58249	1	1
FBgn0000055	6113	-69114	1	1
FBgn0000055	6114	-69600	1	1
FBgn0000055	6115	-71919.5	1	1
FBgn0000055	6116	-74240.5	3	2
FBgn0000055	6117	-74477	3	2
FBgn0000055	6084	98092	18	7
FBgn0000055	6085	97121	18	7
FBgn0000055	6086	96874	18	7
FBgn0000055	6087	87836	18	7
FBgn0000055	6088	86554	18	7
FBgn0000055	6089	81617	18	7
FBgn0000055	6090	78753	18	7
FBgn0000055	6091	78285.5	18	7
FBgn0000055	6092	77982	18	7
FBgn0000055	6093	77668	18	7
FBgn0000055	6094	75245	18	7
FBgn0000055	6095	70757	18	7
FBgn0000055	6096	69979	18	7
FBgn0000055	6097	68680	18	7
FBgn0000055	6098	68231	18	7
FBgn0000055	6099	61379	18	7
FBgn0000055	6100	60748	18	7
FBgn0000055	6101	54842	16	7
FBgn0000055	6102	38025	14	6
FBgn0000055	6103	35995	14	6
FBgn0000055	6104	30183.5	10	5
FBgn0000055	6105	26483	4	4
FBgn0000055	6106	16852	0	0
FBgn0000055	6107	16521	0	0
FBgn0000055	6108	15968	0	0
FBgn0000055	6109	5702	0	0
FBgn0000055	6110	-3723	0	0
FBgn0000055	6111	-41253	1	1
FBgn0000055	6112	-58963	1	1
FBgn0000055	6113	-69828	1	1
FBgn0000055	6114	-70314	1	1
FBgn0000055	6115	-72633.5	1	1
FBgn0000055	6116	-74954.5	3	2
FBgn0000055	6117	-75191	3	2
FBgn0000056	6084	98092	18	7
FBgn0000056	6085	97121	18	7
FBgn0000056	6086	96874	18	7
FBgn0000056	6087	87836	18	7
FBgn0000056	6088	86554	18	7
FBgn0000056	6089	81617	18	7
FBgn0000056	6090	78753	18	7
FBgn0000056	6091	78285.5	18	7
FBgn0000056	6092	77982	18	7
FBgn0000056	6093	77668	18	7
FBgn0000056	6094	75245	18	7
FBgn0000056	6095	70757	18	7
FBgn0000056	6096	69979	18	7
FBgn0000056	6097	68680	18	7
FBgn0000056	6098	68231	18	7
FBgn0000056	6099	61379	18	7
FBgn0000056	6100	60748	18	7
FBgn0000056	6101	54842	16	7
FBgn0000056	6102	38025	14	6
FBgn0000056	6103	35995	14	6
FBgn0000056	6104	30183.5	10	5
FBgn0000056	6105	26483	4	4
FBgn0000056	6106	16852	0	0
FBgn0000056	6107	16521	0	0
FBgn0000056	6108	15968	0	0
FBgn0000056	6109	5702	0	0
FBgn0000056	6110	-3723	0	0
FBgn0000056	6111	-41253	1	1
FBgn0000056	6112	-58963	1	1
FBgn0000056	6113	-69828	1	1
FBgn0000056	6114	-70314	1	1
FBgn0000056	6115	-72633.5	1	1
FBgn0000056	6116	-74954.5	3	2
FBgn0000056	6117	-75191	3	2
FBgn0000056	6084	98806	18	7
FBgn0000056	6085	97835	18	7
FBgn0000056	6086	97588	18	7
FBgn0000056	6087	88550	18	7
FBgn0000056	6088	87268	18	7
FBgn0000056	6089	82331	18	7
FBgn0000056	6090	79467	18	7
FBgn0000056	6091	78999.5	18	7
FBgn0000056	6092	78696	18	7
FBgn0000056	6093	78382	18	7
FBgn0000056	6094	75959	18	7
FBgn0000056	6095	71471	18	7
FBgn0000056	6096	70693	18	7
FBgn0000056	6097	69394	18	7
FBgn0000056	6098	68945	18	7
FBgn0000056	6099	62093	18	7
FBgn0000056	6100	61462	18	7
FBgn0000056	6101	55556	16	7
FBgn0000056	6102	38739	14	6
FBgn0000056	6103	36709	14	6
FBgn0000056	6104	30897.5	10	5
FBgn0000056	6105	27197	4	4
FBgn0000056	6106	17566	0	0
FBgn0000056	6107	17235	0	0
FBgn0000056	6108	16682	0	0
FBgn0000056	6109	6416	0	0
FBgn0000056	6110	-3009	0	0
FBgn0000056	6111	-40539	1	1
FBgn0000056	6112	-58249	1	1
FBgn0000056	6113	-69114	1	1
FBgn0000056	6114	-69600	1	1
FBgn0000056	6115	-71919.5	1	1
FBgn0000056	6116	-74240.5	3	2
FBgn0000056	6117	-74477	3	2
FBgn0000057	981	35092	29	5
FBgn0000057	982	25425	27	5
FBgn0000057	983	24590	25	5
FBgn0000057	984	16174	15	5
FBgn0000057	985	11346	10	5
FBgn0000057	986	10427.5	8	4
FBgn0000057	987	9905	4	2
FBgn0000057	988	-5101.5	6	3
FBgn0000057	989	-6351	11	3
FBgn0000057	990	-8789	13	3
FBgn0000057	991	-35964	35	7
FBgn0000057	992	-57822	40	7
FBgn0000057	993	-59593	41	7
FBgn0000057	994	-79699	43	7
FBgn0000061	5166	87522	35	7
FBgn0000061	5167	70812	19	7
FBgn0000061	5168	69898.5	19	7
FBgn0000061	5169	60847	13	6
FBgn0000061	5170	21801	10	5
FBgn0000061	5171	20304	8	5
FBgn0000061	5172	-36808.5	33	7
FBgn0000061	5173	-53029	54	7
FBgn0000061	5174	-53655	60	7
FBgn0000063	2575	82064	35	7
FBgn0000063	2576	67296.5	34	7
FBgn0000063	2577	66485.5	34	7
FBgn0000063	2578	65849.5	34	7
FBgn0000063	2579	53890.5	22	7
FBgn0000063	2580	51335	18	7
FBgn0000063	2581	48843	18	7
FBgn0000063	2582	46519	18	7
FBgn0000063	2583	25773	18	7
FBgn0000063	2584	25343	18	7
FBgn0000063	2585	25008	18	7
FBgn0000063	2586	24370	18	7
FBgn0000063	2587	5137	5	5
FBgn0000063	2588	3253	4	4
FBgn0000063	2589	445	2	2
FBgn0000063	2590	-10123	6	5
FBgn0000063	2591	-10876	6	5
FBgn0000063	2592	-11199.5	7	5
FBgn0000063	2593	-11808	12	6
FBgn0000063	2594	-34609.5	17	6
FBgn0000063	2595	-41418	18	6
FBgn0000063	2596	-41994	18	6
FBgn0000063	2597	-45870.5	20	6
FBgn0000063	2598	-46329	22	6
FBgn0000063	2599	-46783	24	6
FBgn0000063	2600	-47173	29	6
FBgn0000064	3176	-91278	16	7
FBgn0000064	3177	-2432.5	1	1
FBgn0000064	3178	83162	14	5
FBgn0000064	3179	83722	14	5
FBgn0000064	3176	-89519	15	7
FBgn0000064	3177	-673.5	0	0
FBgn0000064	3178	84921	15	5
FBgn0000064	3179	85481	15	5
FBgn0000064	3176	-87964	14	7
FBgn0000064	3177	881.5	1	1
FBgn0000064	3178	86476	16	5
FBgn0000064	3179	87036	16	5
FBgn0000064	3176	-87964	14	7
FBgn0000064	3177	881.5	1	1
FBgn0000064	3178	86476	16	5
FBgn0000064	3179	87036	16	5
FBgn0000064	3176	-91011	16	7
FBgn0000064	3177	-2165.5	1	1
FBgn0000064	3178	83429	14	5
FBgn0000064	3179	83989	14	5
FBgn0000064	3176	-88961	15	7
FBgn0000064	3177	-115.5	0	0
FBgn0000064	3178	85479	15	5
FBgn0000064	3179	86039	15	5
FBgn0000071	1685	26602.5	19	5
FBgn0000071	1686	20536	18	5
FBgn0000071	1687	12044	18	5
FBgn0000071	1688	10937	18	5
FBgn0000071	1689	10420	18	5
FBgn0000071	1690	8349	18	5
FBgn0000071	1691	6923	18	5
FBgn0000071	1692	2050	5	4
FBgn0000071	1693	998	2	2
FBgn0000071	1694	-175	0	0
FBgn0000071	1695	-533	0	0
FBgn0000071	1696	-4597	2	2
FBgn0000071	1697	-17674	8	5
FBgn0000071	1698	-29089	14	5
FBgn0000071	1699	-48249	23	6
FBgn0000071	1700	-50439	25	6
FBgn0000071	1701	-55579	30	6
FBgn0000071	1702	-56838	32	6
FBgn0000071	1703	-57390	33	6
FBgn0000071	1704	-57774	35	6
FBgn0000071	1705	-58487	36	6
FBgn0000071	1706	-59785	36	6
FBgn0000071	1707	-67873	36	6
FBgn0000071	1708	-83385.5	36	6
FBgn0000071	1709	-84349.5	36	6
FBgn0000071	1710	-86213	38	6
FBgn0000071	1711	-91133	40	6
FBgn0000071	1712	-91928	41	6
FBgn0000071	1685	27415.5	19	5
FBgn0000071	1686	21349	18	5
FBgn0000071	1687	12857	18	5
FBgn0000071	1688	11750	18	5
FBgn0000071	1689	11233	18	5
FBgn0000071	1690	9162	18	5
FBgn0000071	1691	7736	18	5
FBgn0000071	1692	2863	5	4
FBgn0000071	1693	1811	2	2
FBgn0000071	1694	638	0	0
FBgn0000071	1695	280	0	0
FBgn0000071	1696	-3784	2	2
FBgn0000071	1697	-16861	8	5
FBgn0000071	1698	-28276	14	5
FBgn0000071	1699	-47436	23	6
FBgn0000071	1700	-49626	25	6
FBgn0000071	1701	-54766	30	6
FBgn0000071	1702	-56025	32	6
FBgn0000071	1703	-56577	33	6
FBgn0000071	1704	-56961	35	6
FBgn0000071	1705	-57674	36	6
FBgn0000071	1706	-58972	36	6
FBgn0000071	1707	-67060	36	6
FBgn0000071	1708	-82572.5	36	6
FBgn0000071	1709	-83536.5	36	6
FBgn0000071	1710	-85400	38	6
FBgn0000071	1711	-90320	40	6
FBgn0000071	1712	-91115	41	6
FBgn0000071	1685	27415.5	19	5
FBgn0000071	1686	21349	18	5
FBgn0000071	1687	12857	18	5
FBgn0000071	1688	11750	18	5
FBgn0000071	1689	11233	18	5
FBgn0000071	1690	9162	18	5
FBgn0000071	1691	7736	18	5
FBgn0000071	1692	2863	5	4
FBgn0000071	1693	1811	2	2
FBgn0000071	1694	638	0	0
FBgn0000071	1695	280	0	0
FBgn0000071	1696	-3784	2	2
FBgn0000071	1697	-16861	8	5
FBgn0000071	1698	-28276	14	5
FBgn0000071	1699	-47436	23	6
FBgn0000071	1700	-49626	25	6
FBgn0000071	1701	-54766	30	6
FBgn0000071	1702	-56025	32	6
FBgn0000071	1703	-56577	33	6
FBgn0000071	1704	-56961	35	6
FBgn0000071	1705	-57674	36	6
FBgn0000071	1706	-58972	36	6
FBgn0000071	1707	-67060	36	6
FBgn0000071	1708	-82572.5	36	6
FBgn0000071	1709	-83536.5	36	6
FBgn0000071	1710	-85400	38	6
FBgn0000071	1711	-90320	40	6
FBgn0000071	1712	-91115	41	6
FBgn0000075	6346	75595	34	6
FBgn0000075	6347	74211	31	6
FBgn0000075	6348	73518	31	6
FBgn0000075	6349	72753.5	30	6
FBgn0000075	6350	41622	1	1
FBgn0000075	6351	41338.5	1	1
FBgn0000075	6352	30219	1	1
FBgn0000075	6353	1425.5	0	0
FBgn0000075	6354	-23434.5	15	4
FBgn0000075	6355	-25168	24	6
FBgn0000075	6356	-26723	27	6
FBgn0000075	6357	-36166	28	6
FBgn0000075	6358	-45064.5	29	6
FBgn0000075	6359	-46419	29	6
FBgn0000075	6360	-48100	34	6
FBgn0000075	6361	-48447	35	6
FBgn0000075	6362	-48733	35	6
FBgn0000075	6363	-50445	36	6
FBgn0000075	6364	-51268	37	6
FBgn0000075	6365	-53810	39	6
FBgn0000075	6366	-54819	40	6
FBgn0000075	6367	-55072	42	6
FBgn0000075	6368	-56171	49	7
FBgn0000075	6369	-80151	57	7
FBgn0000075	6346	77280	38	7
FBgn0000075	6347	75896	35	7
FBgn0000075	6348	75203	35	7
FBgn0000075	6349	74438.5	34	7
FBgn0000075	6350	43307	5	4
FBgn0000075	6351	43023.5	5	4
FBgn0000075	6352	31904	5	4
FBgn0000075	6353	3110.5	4	3
FBgn0000075	6354	-21749.5	11	3
FBgn0000075	6355	-23483	20	6
FBgn0000075	6356	-25038	23	6
FBgn0000075	6357	-34481	24	6
FBgn0000075	6358	-43379.5	25	6
FBgn0000075	6359	-44734	25	6
FBgn0000075	6360	-46415	30	6
FBgn0000075	6361	-46762	31	6
FBgn0000075	6362	-47048	31	6
FBgn0000075	6363	-48760	32	6
FBgn0000075	6364	-49583	33	6
FBgn0000075	6365	-52125	35	6
FBgn0000075	6366	-53134	36	6
FBgn0000075	6367	-53387	38	6
FBgn0000075	6368	-54486	45	7
FBgn0000075	6369	-78466	53	7
FBgn0000077	7305	-94910	53	7
FBgn0000077	7306	-92048	53	7
FBgn0000077	7307	-91607.5	53	7
FBgn0000077	7308	-83578	39	7
FBgn0000077	7309	-83242	38	7
FBgn0000077	7310	-82440	36	6
FBgn0000077	7311	-3769	9	5
FBgn0000077	7312	-351	2	2
FBgn0000077	7313	3047	3	3
FBgn0000077	7314	35264	19	6
FBgn0000077	7315	89224	44	7
FBgn0000078	906	97548	31	7
FBgn0000078	907	97274	31	7
FBgn0000078	908	96931	25	7
FBgn0000078	909	96521	25	7
FBgn0000078	910	48536.5	15	7
FBgn0000078	911	46756	15	7
FBgn0000078	912	46248	15	7
FBgn0000078	913	41471	15	7
FBgn0000078	914	40521.5	15	7
FBgn0000078	915	16559	3	3
FBgn0000078	916	-17635	4	4
FBgn0000078	917	-19159	4	4
FBgn0000078	918	-20255	6	5
FBgn0000078	919	-20748	6	5
FBgn0000079	906	-93089	31	7
FBgn0000079	907	-92815	31	7
FBgn0000079	908	-92472	25	7
FBgn0000079	909	-92062	25	7
FBgn0000079	910	-44077.5	15	7
FBgn0000079	911	-42297	15	7
FBgn0000079	912	-41789	15	7
FBgn0000079	913	-37012	15	7
FBgn0000079	914	-36062.5	15	7
FBgn0000079	915	-12100	3	3
FBgn0000079	916	22094	4	4
FBgn0000079	917	23618	4	4
FBgn0000079	918	24714	6	5
FBgn0000079	919	25207	6	5
FBgn0000083	2775	74662	20	6
FBgn0000083	2776	39418	14	6
FBgn0000083	2777	36558	14	6
FBgn0000083	2778	4506.5	9	6
FBgn0000083	2779	-30983	15	6
FBgn0000083	2780	-31493	15	6
FBgn0000083	2781	-46088	32	6
FBgn0000083	2782	-46863.5	34	6
FBgn0000083	2783	-91558.5	63	7
FBgn0000083	2775	74662	20	6
FBgn0000083	2776	39418	14	6
FBgn0000083	2777	36558	14	6
FBgn0000083	2778	4506.5	9	6
FBgn0000083	2779	-30983	15	6
FBgn0000083	2780	-31493	15	6
FBgn0000083	2781	-46088	32	6
FBgn0000083	2782	-46863.5	34	6
FBgn0000083	2783	-91558.5	63	7
FBgn0000083	2775	74662	20	6
FBgn0000083	2776	39418	14	6
FBgn0000083	2777	36558	14	6
FBgn0000083	2778	4506.5	9	6
FBgn0000083	2779	-30983	15	6
FBgn0000083	2780	-31493	15	6
FBgn0000083	2781	-46088	32	6
FBgn0000083	2782	-46863.5	34	6
FBgn0000083	2783	-91558.5	63	7
FBgn0000083	2775	74662	20	6
FBgn0000083	2776	39418	14	6
FBgn0000083	2777	36558	14	6
FBgn0000083	2778	4506.5	9	6
FBgn0000083	2779	-30983	15	6
FBgn0000083	2780	-31493	15	6
FBgn0000083	2781	-46088	32	6
FBgn0000083	2782	-46863.5	34	6
FBgn0000083	2783	-91558.5	63	7
FBgn0000084	7940	55055	36	7
FBgn0000084	7941	55256	38	7
FBgn0000092	6864	-89454	66	7
FBgn0000092	6865	-85018.5	66	7
FBgn0000092	6866	-42790	29	6
FBgn0000092	6867	-41062	28	6
FBgn0000092	6868	-37532	25	6
FBgn0000092	6869	-34941	19	6
FBgn0000092	6870	-30688	15	6
FBgn0000092	6871	71854	32	7
FBgn0000092	6872	95607	35	7
FBgn0000094	3370	99014	39	7
FBgn0000094	3371	52381	23	6
FBgn0000094	3372	35626	17	6
FBgn0000094	3373	35006.5	17	6
FBgn0000094	3374	34726	17	6
FBgn0000094	3375	12118	11	6
FBgn0000094	3376	-38334	8	4
FBgn0000094	3377	-38799	8	4
FBgn0000094	3378	-42541.5	11	4
FBgn0000094	3379	-62847	18	4
FBgn0000094	3380	-65069.5	20	4
FBgn0000094	3381	-66132.5	22	4
FBgn0000094	3382	-67132	22	4
FBgn0000097	5280	-46266	17	3
FBgn0000097	5281	-17033.5	11	1
FBgn0000097	5282	-16436	11	1
FBgn0000097	5283	-15577.5	10	1
FBgn0000097	5284	-13754.5	8	1
FBgn0000097	5285	-6220	6	1
FBgn0000097	5286	-3538	4	1
FBgn0000097	5287	-1422	2	1
FBgn0000097	5288	-284.5	1	1
FBgn0000097	5289	414	0	0
FBgn0000097	5290	2146	1	1
FBgn0000097	5291	3479	2	1
FBgn0000097	5292	4229	2	1
FBgn0000097	5293	4557.5	3	1
FBgn0000097	5294	4796	3	1
FBgn0000097	5295	18049	16	6
FBgn0000097	5296	18407.5	16	6
FBgn0000097	5297	19187.5	18	6
FBgn0000097	5298	20275.5	18	6
FBgn0000097	5299	21626.5	18	6
FBgn0000097	5300	23003.5	19	6
FBgn0000097	5301	23513	19	6
FBgn0000097	5302	23803	19	6
FBgn0000097	5303	24320	20	6
FBgn0000097	5304	24908	21	6
FBgn0000097	5305	38630.5	29	6
FBgn0000097	5306	47633	39	6
FBgn0000097	5280	-29039	6	3
FBgn0000097	5281	193.5	0	0
FBgn0000097	5282	791	0	0
FBgn0000097	5283	1649.5	1	1
FBgn0000097	5284	3472.5	3	1
FBgn0000097	5285	11007	5	1
FBgn0000097	5286	13689	7	1
FBgn0000097	5287	15805	9	1
FBgn0000097	5288	16942.5	10	1
FBgn0000097	5289	17641	11	1
FBgn0000097	5290	19373	12	1
FBgn0000097	5291	20706	13	1
FBgn0000097	5292	21456	13	1
FBgn0000097	5293	21784.5	14	1
FBgn0000097	5294	22023	14	1
FBgn0000097	5295	35276	27	6
FBgn0000097	5296	35634.5	27	6
FBgn0000097	5297	36414.5	29	6
FBgn0000097	5298	37502.5	29	6
FBgn0000097	5299	38853.5	29	6
FBgn0000097	5300	40230.5	30	6
FBgn0000097	5301	40740	30	6
FBgn0000097	5302	41030	30	6
FBgn0000097	5303	41547	31	6
FBgn0000097	5304	42135	32	6
FBgn0000097	5305	55857.5	40	6
FBgn0000097	5306	64860	50	6
FBgn0000099	4	-70892	36	6
FBgn0000099	5	-62391	33	6
FBgn0000099	6	-53406	26	6
FBgn0000099	7	-33367	18	6
FBgn0000099	8	-24623	3	2
FBgn0000099	9	-16739.5	3	2
FBgn0000099	10	-15481	1	1
FBgn0000099	11	-735	1	1
FBgn0000099	12	135	0	0
FBgn0000099	13	9617	1	1
FBgn0000099	14	55638	25	6
FBgn0000099	15	56027.5	26	6
FBgn0000099	4	-53354	33	6
FBgn0000099	5	-44853	30	5
FBgn0000099	6	-35868	23	5
FBgn0000099	7	-15829	15	5
FBgn0000099	8	-7085	0	0
FBgn0000099	9	798.5	0	0
FBgn0000099	10	2057	2	1
FBgn0000099	11	16803	2	1
FBgn0000099	12	17673	3	2
FBgn0000099	13	27155	4	2
FBgn0000099	14	73176	28	6
FBgn0000099	15	73565.5	29	6
FBgn0000099	4	-70892	36	6
FBgn0000099	5	-62391	33	6
FBgn0000099	6	-53406	26	6
FBgn0000099	7	-33367	18	6
FBgn0000099	8	-24623	3	2
FBgn0000099	9	-16739.5	3	2
FBgn0000099	10	-15481	1	1
FBgn0000099	11	-735	1	1
FBgn0000099	12	135	0	0
FBgn0000099	13	9617	1	1
FBgn0000099	14	55638	25	6
FBgn0000099	15	56027.5	26	6
FBgn0000099	4	-61111	35	6
FBgn0000099	5	-52610	32	6
FBgn0000099	6	-43625	25	6
FBgn0000099	7	-23586	17	6
FBgn0000099	8	-14842	2	1
FBgn0000099	9	-6958.5	2	1
FBgn0000099	10	-5700	0	0
FBgn0000099	11	9046	0	0
FBgn0000099	12	9916	1	1
FBgn0000099	13	19398	2	2
FBgn0000099	14	65419	26	6
FBgn0000099	15	65808.5	27	6
FBgn0000100	5079	69703	10	4
FBgn0000100	5080	24268.5	9	3
FBgn0000100	5081	9076	6	2
FBgn0000100	5082	-42636	5	4
FBgn0000100	5083	-58318	10	5
FBgn0000100	5084	-59069	10	5
FBgn0000100	5085	-81899	12	5
FBgn0000100	5086	-83666	12	5
FBgn0000100	5087	-84826.5	12	5
FBgn0000108	6652	78258	53	7
FBgn0000108	6653	76354	53	7
FBgn0000108	6654	74382.5	53	7
FBgn0000108	6655	72778	52	7
FBgn0000108	6656	67581	52	7
FBgn0000108	6657	66101	52	7
FBgn0000108	6658	43944.5	41	7
FBgn0000108	6659	37651	34	7
FBgn0000108	6660	19107	24	7
FBgn0000108	6661	9563.5	20	7
FBgn0000108	6662	9063	20	7
FBgn0000108	6663	8128	18	6
FBgn0000108	6664	7801	18	6
FBgn0000108	6665	1593.5	13	6
FBgn0000108	6666	839	7	5
FBgn0000108	6667	-2537	7	5
FBgn0000108	6668	-15141	12	6
FBgn0000108	6669	-52129	23	6
FBgn0000108	6670	-57847	24	6
FBgn0000108	6671	-59131	25	6
FBgn0000108	6672	-61221	25	6
FBgn0000108	6673	-64373	25	6
FBgn0000108	6674	-88266	31	7
FBgn0000108	6675	-88630	31	7
FBgn0000108	6676	-89680.5	31	7
FBgn0000108	6677	-97996	42	7
FBgn0000109	3683	-91425	66	7
FBgn0000109	3684	-90292	61	7
FBgn0000109	3685	-89277.5	59	7
FBgn0000109	3686	-81795	48	7
FBgn0000109	3687	-74631	48	7
FBgn0000109	3688	31879	22	7
FBgn0000109	3689	82996	40	7
FBgn0000114	5928	-46663	8	2
FBgn0000114	5928	18430	2	2
FBgn0000114	5929	-77922	12	7
FBgn0000114	5930	-95174	34	7
FBgn0000114	5928	18430	2	2
FBgn0000114	5929	-77922	12	7
FBgn0000114	5930	-95174	34	7
FBgn0000114	5928	34719	5	3
FBgn0000114	5929	-61633	9	6
FBgn0000114	5930	-78885	31	6
FBgn0000114	5928	18446	2	2
FBgn0000114	5929	-77906	12	7
FBgn0000114	5930	-95158	34	7
FBgn0000115	4654	-3327	0	0
FBgn0000115	4655	-13133	4	4
FBgn0000115	4656	-29423.5	15	6
FBgn0000115	4657	-29736	15	6
FBgn0000115	4658	-32523	15	6
FBgn0000115	4659	-34538	16	6
FBgn0000115	4660	-42104	21	7
FBgn0000115	4661	-43163.5	21	7
FBgn0000115	4662	-44371	21	7
FBgn0000115	4663	-54171	25	7
FBgn0000115	4664	-60597.5	31	7
FBgn0000115	4665	-61190.5	31	7
FBgn0000115	4666	-61758	32	7
FBgn0000115	4667	-62221	33	7
FBgn0000115	4668	-62708	33	7
FBgn0000115	4669	-63070	34	7
FBgn0000115	4670	-63692	34	7
FBgn0000115	4671	-65278	36	7
FBgn0000115	4672	-66091	36	7
FBgn0000115	4673	-66338	36	7
FBgn0000115	4674	-67041.5	39	7
FBgn0000115	4675	-68067	44	7
FBgn0000115	4676	-68856	51	7
FBgn0000115	4677	-69300.5	51	7
FBgn0000115	4678	-69707	57	7
FBgn0000115	4679	-75712	59	7
FBgn0000115	4680	-78665	59	7
FBgn0000115	4681	-89841	60	7
FBgn0000115	4682	-91676.5	60	7
FBgn0000116	4112	-79267	48	7
FBgn0000116	4113	-62349.5	39	7
FBgn0000116	4114	-61510	39	7
FBgn0000116	4115	-61102	38	7
FBgn0000116	4116	-55449.5	37	7
FBgn0000116	4117	-54795	37	7
FBgn0000116	4118	-54310.5	37	7
FBgn0000116	4119	-53732	37	7
FBgn0000116	4120	-52104	37	7
FBgn0000116	4121	-48669	37	7
FBgn0000116	4122	-43614	36	7
FBgn0000116	4123	-38067	36	7
FBgn0000116	4124	-36569	36	7
FBgn0000116	4125	-36269	36	7
FBgn0000116	4126	-35163	36	7
FBgn0000116	4127	-30887.5	36	7
FBgn0000116	4128	-26890	35	7
FBgn0000116	4129	-24721	35	7
FBgn0000116	4130	-23570.5	35	7
FBgn0000116	4131	-22168	35	7
FBgn0000116	4132	-11037	12	6
FBgn0000116	4133	-4723	6	5
FBgn0000116	4134	6257	2	2
FBgn0000116	4135	47631.5	11	6
FBgn0000116	4136	48005	11	6
FBgn0000116	4137	48948.5	11	6
FBgn0000116	4138	55351	12	6
FBgn0000116	4139	57680	12	6
FBgn0000116	4140	62520	17	7
FBgn0000116	4141	68485	18	7
FBgn0000116	4142	71198	28	7
FBgn0000116	4112	-76188	43	7
FBgn0000116	4113	-59270.5	34	7
FBgn0000116	4114	-58431	34	7
FBgn0000116	4115	-58023	33	7
FBgn0000116	4116	-52370.5	32	7
FBgn0000116	4117	-51716	32	7
FBgn0000116	4118	-51231.5	32	7
FBgn0000116	4119	-50653	32	7
FBgn0000116	4120	-49025	32	7
FBgn0000116	4121	-45590	32	7
FBgn0000116	4122	-40535	31	7
FBgn0000116	4123	-34988	31	7
FBgn0000116	4124	-33490	31	7
FBgn0000116	4125	-33190	31	7
FBgn0000116	4126	-32084	31	7
FBgn0000116	4127	-27808.5	31	7
FBgn0000116	4128	-23811	30	7
FBgn0000116	4129	-21642	30	7
FBgn0000116	4130	-20491.5	30	7
FBgn0000116	4131	-19089	30	7
FBgn0000116	4132	-7958	7	5
FBgn0000116	4133	-1644	1	1
FBgn0000116	4134	9336	7	5
FBgn0000116	4135	50710.5	16	6
FBgn0000116	4136	51084	16	6
FBgn0000116	4137	52027.5	16	6
FBgn0000116	4138	58430	17	6
FBgn0000116	4139	60759	17	6
FBgn0000116	4140	65599	22	7
FBgn0000116	4141	71564	23	7
FBgn0000116	4142	74277	33	7
FBgn0000116	4112	-70819	41	7
FBgn0000116	4113	-53901.5	32	7
FBgn0000116	4114	-53062	32	7
FBgn0000116	4115	-52654	31	7
FBgn0000116	4116	-47001.5	30	7
FBgn0000116	4117	-46347	30	7
FBgn0000116	4118	-45862.5	30	7
FBgn0000116	4119	-45284	30	7
FBgn0000116	4120	-43656	30	7
FBgn0000116	4121	-40221	30	7
FBgn0000116	4122	-35166	29	7
FBgn0000116	4123	-29619	29	7
FBgn0000116	4124	-28121	29	7
FBgn0000116	4125	-27821	29	7
FBgn0000116	4126	-26715	29	7
FBgn0000116	4127	-22439.5	29	7
FBgn0000116	4128	-18442	28	7
FBgn0000116	4129	-16273	28	7
FBgn0000116	4130	-15122.5	28	7
FBgn0000116	4131	-13720	28	7
FBgn0000116	4132	-2589	5	4
FBgn0000116	4133	3725	1	1
FBgn0000116	4134	14705	9	6
FBgn0000116	4135	56079.5	18	7
FBgn0000116	4136	56453	18	7
FBgn0000116	4137	57396.5	18	7
FBgn0000116	4138	63799	19	7
FBgn0000116	4139	66128	19	7
FBgn0000116	4140	70968	24	7
FBgn0000116	4141	76933	25	7
FBgn0000116	4142	79646	35	7
FBgn0000116	4112	-64988	23	7
FBgn0000116	4113	-48070.5	14	7
FBgn0000116	4114	-47231	14	7
FBgn0000116	4115	-46823	13	7
FBgn0000116	4116	-41170.5	12	7
FBgn0000116	4117	-40516	12	7
FBgn0000116	4118	-40031.5	12	7
FBgn0000116	4119	-39453	12	7
FBgn0000116	4120	-37825	12	7
FBgn0000116	4121	-34390	12	7
FBgn0000116	4122	-29335	11	6
FBgn0000116	4123	-23788	11	6
FBgn0000116	4124	-22290	11	6
FBgn0000116	4125	-21990	11	6
FBgn0000116	4126	-20884	11	6
FBgn0000116	4127	-16608.5	11	6
FBgn0000116	4128	-12611	10	6
FBgn0000116	4129	-10442	10	6
FBgn0000116	4130	-9291.5	10	6
FBgn0000116	4131	-7889	10	6
FBgn0000116	4132	3242	13	5
FBgn0000116	4133	9556	19	5
FBgn0000116	4134	20536	27	6
FBgn0000116	4135	61910.5	36	7
FBgn0000116	4136	62284	36	7
FBgn0000116	4137	63227.5	36	7
FBgn0000116	4138	69630	37	7
FBgn0000116	4139	71959	37	7
FBgn0000116	4140	76799	42	7
FBgn0000116	4141	82764	43	7
FBgn0000116	4142	85477	53	7
FBgn0000116	4112	-79267	48	7
FBgn0000116	4113	-62349.5	39	7
FBgn0000116	4114	-61510	39	7
FBgn0000116	4115	-61102	38	7
FBgn0000116	4116	-55449.5	37	7
FBgn0000116	4117	-54795	37	7
FBgn0000116	4118	-54310.5	37	7
FBgn0000116	4119	-53732	37	7
FBgn0000116	4120	-52104	37	7
FBgn0000116	4121	-48669	37	7
FBgn0000116	4122	-43614	36	7
FBgn0000116	4123	-38067	36	7
FBgn0000116	4124	-36569	36	7
FBgn0000116	4125	-36269	36	7
FBgn0000116	4126	-35163	36	7
FBgn0000116	4127	-30887.5	36	7
FBgn0000116	4128	-26890	35	7
FBgn0000116	4129	-24721	35	7
FBgn0000116	4130	-23570.5	35	7
FBgn0000116	4131	-22168	35	7
FBgn0000116	4132	-11037	12	6
FBgn0000116	4133	-4723	6	5
FBgn0000116	4134	6257	2	2
FBgn0000116	4135	47631.5	11	6
FBgn0000116	4136	48005	11	6
FBgn0000116	4137	48948.5	11	6
FBgn0000116	4138	55351	12	6
FBgn0000116	4139	57680	12	6
FBgn0000116	4140	62520	17	7
FBgn0000116	4141	68485	18	7
FBgn0000116	4142	71198	28	7
FBgn0000116	4112	-70819	41	7
FBgn0000116	4113	-53901.5	32	7
FBgn0000116	4114	-53062	32	7
FBgn0000116	4115	-52654	31	7
FBgn0000116	4116	-47001.5	30	7
FBgn0000116	4117	-46347	30	7
FBgn0000116	4118	-45862.5	30	7
FBgn0000116	4119	-45284	30	7
FBgn0000116	4120	-43656	30	7
FBgn0000116	4121	-40221	30	7
FBgn0000116	4122	-35166	29	7
FBgn0000116	4123	-29619	29	7
FBgn0000116	4124	-28121	29	7
FBgn0000116	4125	-27821	29	7
FBgn0000116	4126	-26715	29	7
FBgn0000116	4127	-22439.5	29	7
FBgn0000116	4128	-18442	28	7
FBgn0000116	4129	-16273	28	7
FBgn0000116	4130	-15122.5	28	7
FBgn0000116	4131	-13720	28	7
FBgn0000116	4132	-2589	5	4
FBgn0000116	4133	3725	1	1
FBgn0000116	4134	14705	9	6
FBgn0000116	4135	56079.5	18	7
FBgn0000116	4136	56453	18	7
FBgn0000116	4137	57396.5	18	7
FBgn0000116	4138	63799	19	7
FBgn0000116	4139	66128	19	7
FBgn0000116	4140	70968	24	7
FBgn0000116	4141	76933	25	7
FBgn0000116	4142	79646	35	7
FBgn0000117	6752	-66857	30	6
FBgn0000117	6753	-50648	30	6
FBgn0000117	6754	-22260	16	6
FBgn0000117	6755	-19862	14	6
FBgn0000117	6756	-9443	7	3
FBgn0000117	6757	65.5	0	0
FBgn0000117	6758	23870	12	5
FBgn0000117	6759	28394	19	5
FBgn0000117	6760	40585	20	6
FBgn0000117	6761	43986	26	7
FBgn0000117	6762	44551	27	7
FBgn0000117	6763	45799	28	7
FBgn0000117	6764	52146.5	34	7
FBgn0000117	6765	63656	48	7
FBgn0000117	6766	64819	52	7
FBgn0000117	6767	65020	52	7
FBgn0000117	6768	66585	55	7
FBgn0000117	6769	67819	55	7
FBgn0000117	6770	73392	57	7
FBgn0000117	6771	73853	57	7
FBgn0000117	6772	74256	57	7
FBgn0000117	6773	74503	57	7
FBgn0000117	6774	75200	58	7
FBgn0000117	6775	75561	58	7
FBgn0000117	6776	76459	59	7
FBgn0000117	6777	76926	59	7
FBgn0000117	6778	85769	60	7
FBgn0000117	6752	-66857	30	6
FBgn0000117	6753	-50648	30	6
FBgn0000117	6754	-22260	16	6
FBgn0000117	6755	-19862	14	6
FBgn0000117	6756	-9443	7	3
FBgn0000117	6757	65.5	0	0
FBgn0000117	6758	23870	12	5
FBgn0000117	6759	28394	19	5
FBgn0000117	6760	40585	20	6
FBgn0000117	6761	43986	26	7
FBgn0000117	6762	44551	27	7
FBgn0000117	6763	45799	28	7
FBgn0000117	6764	52146.5	34	7
FBgn0000117	6765	63656	48	7
FBgn0000117	6766	64819	52	7
FBgn0000117	6767	65020	52	7
FBgn0000117	6768	66585	55	7
FBgn0000117	6769	67819	55	7
FBgn0000117	6770	73392	57	7
FBgn0000117	6771	73853	57	7
FBgn0000117	6772	74256	57	7
FBgn0000117	6773	74503	57	7
FBgn0000117	6774	75200	58	7
FBgn0000117	6775	75561	58	7
FBgn0000117	6776	76459	59	7
FBgn0000117	6777	76926	59	7
FBgn0000117	6778	85769	60	7
FBgn0000117	6752	-66857	30	6
FBgn0000117	6753	-50648	30	6
FBgn0000117	6754	-22260	16	6
FBgn0000117	6755	-19862	14	6
FBgn0000117	6756	-9443	7	3
FBgn0000117	6757	65.5	0	0
FBgn0000117	6758	23870	12	5
FBgn0000117	6759	28394	19	5
FBgn0000117	6760	40585	20	6
FBgn0000117	6761	43986	26	7
FBgn0000117	6762	44551	27	7
FBgn0000117	6763	45799	28	7
FBgn0000117	6764	52146.5	34	7
FBgn0000117	6765	63656	48	7
FBgn0000117	6766	64819	52	7
FBgn0000117	6767	65020	52	7
FBgn0000117	6768	66585	55	7
FBgn0000117	6769	67819	55	7
FBgn0000117	6770	73392	57	7
FBgn0000117	6771	73853	57	7
FBgn0000117	6772	74256	57	7
FBgn0000117	6773	74503	57	7
FBgn0000117	6774	75200	58	7
FBgn0000117	6775	75561	58	7
FBgn0000117	6776	76459	59	7
FBgn0000117	6777	76926	59	7
FBgn0000117	6778	85769	60	7
FBgn0000117	6752	-67436	30	6
FBgn0000117	6753	-51227	30	6
FBgn0000117	6754	-22839	16	6
FBgn0000117	6755	-20441	14	6
FBgn0000117	6756	-10022	7	3
FBgn0000117	6757	-513.5	0	0
FBgn0000117	6758	23291	12	5
FBgn0000117	6759	27815	19	5
FBgn0000117	6760	40006	20	6
FBgn0000117	6761	43407	26	7
FBgn0000117	6762	43972	27	7
FBgn0000117	6763	45220	28	7
FBgn0000117	6764	51567.5	34	7
FBgn0000117	6765	63077	48	7
FBgn0000117	6766	64240	52	7
FBgn0000117	6767	64441	52	7
FBgn0000117	6768	66006	55	7
FBgn0000117	6769	67240	55	7
FBgn0000117	6770	72813	57	7
FBgn0000117	6771	73274	57	7
FBgn0000117	6772	73677	57	7
FBgn0000117	6773	73924	57	7
FBgn0000117	6774	74621	58	7
FBgn0000117	6775	74982	58	7
FBgn0000117	6776	75880	59	7
FBgn0000117	6777	76347	59	7
FBgn0000117	6778	85190	60	7
FBgn0000117	6752	-67887	31	6
FBgn0000117	6753	-51678	31	6
FBgn0000117	6754	-23290	17	6
FBgn0000117	6755	-20892	15	6
FBgn0000117	6756	-10473	8	3
FBgn0000117	6757	-964.5	1	1
FBgn0000117	6758	22840	11	5
FBgn0000117	6759	27364	18	5
FBgn0000117	6760	39555	19	6
FBgn0000117	6761	42956	25	7
FBgn0000117	6762	43521	26	7
FBgn0000117	6763	44769	27	7
FBgn0000117	6764	51116.5	33	7
FBgn0000117	6765	62626	47	7
FBgn0000117	6766	63789	51	7
FBgn0000117	6767	63990	51	7
FBgn0000117	6768	65555	54	7
FBgn0000117	6769	66789	54	7
FBgn0000117	6770	72362	56	7
FBgn0000117	6771	72823	56	7
FBgn0000117	6772	73226	56	7
FBgn0000117	6773	73473	56	7
FBgn0000117	6774	74170	57	7
FBgn0000117	6775	74531	57	7
FBgn0000117	6776	75429	58	7
FBgn0000117	6777	75896	58	7
FBgn0000117	6778	84739	59	7
FBgn0000119	637	-85699	32	7
FBgn0000119	638	-55650	21	6
FBgn0000119	639	-52443	21	6
FBgn0000119	640	-50803	20	6
FBgn0000119	641	-45456	20	6
FBgn0000119	642	-35292.5	18	6
[truncated: 315,739 more rows]
