# Supplementary material for: Predicting Spatial and Temporal Gene Expression Using an Integrative Model of Transcription Factor Occupancy and Chromatin State
Source: PLoS Comput Biol. 2012 Dec 6;8(12):e1002798. doi: 10.1371/journal.pcbi.1002798 (PMC3516547; doi:10.1371/journal.pcbi.1002798)
Supplement: Dataset S4 — Promoter activity estimates based on histone H3K4 tri-methylation from mod-encode for spatial (a) and temporal (b) expression classes. (XLS) [file pcbi.1002798.s004.xls]

## Sheet: Wilczynski_Dataset_S4a
Gene	SM_ONLY	VM_SM	MESO_ONLY	VM	MESO_SM	MESO	SM	VM_ONLY	MESO_VM
FBgn0035367	0.0198555956679	0.00180505415162	0.00715071507151	0.00361010830325	0.0	0.00715071507151	0.0228640192539	0.001100110011	0.0023768366465
FBgn0027563	0.0198555956679	0.00180505415162	0.00715071507151	0.00361010830325	0.0	0.00715071507151	0.0228640192539	0.001100110011	0.0023768366465
FBgn0027560	0.0325814536341	0.015873015873	0.0401869158879	0.0392648287385	0.0140186915888	0.0691588785047	0.0651629072682	0.0130841121495	0.0023768366465
FBgn0027561	0.00282007896221	0.00112803158488	0.00630733944954	0.00338409475465	0.00286697247706	0.00974770642202	0.00507614213198	0.00172018348624	0.0023768366465
FBgn0036260	0.0198555956679	0.00180505415162	0.00715071507151	0.00361010830325	0.0	0.00715071507151	0.0228640192539	0.001100110011	0.0023768366465
FBgn0027569	0.00282007896221	0.00112803158488	0.00630733944954	0.00338409475465	0.00286697247706	0.00974770642202	0.00507614213198	0.00172018348624	0.0023768366465
FBgn0010434	0.00282007896221	0.00112803158488	0.0401869158879	0.00338409475465	0.0140186915888	0.0691588785047	0.00507614213198	0.0130841121495	0.0023768366465
FBgn0010435	0.0325814536341	0.015873015873	0.00715071507151	0.0392648287385	0.0	0.00715071507151	0.0651629072682	0.001100110011	0.0023768366465
FBgn0036115	0.0325814536341	0.015873015873	0.0401869158879	0.0392648287385	0.0140186915888	0.0691588785047	0.0651629072682	0.0130841121495	0.0023768366465
FBgn0033434	0.00282007896221	0.00112803158488	0.00630733944954	0.00338409475465	0.00286697247706	0.00974770642202	0.00507614213198	0.00172018348624	0.0023768366465
FBgn0033437	0.0198555956679	0.00180505415162	0.00715071507151	0.00361010830325	0.0	0.00715071507151	0.0228640192539	0.001100110011	0.0023768366465
FBgn0033431	0.0325814536341	0.015873015873	0.0401869158879	0.0392648287385	0.0140186915888	0.0691588785047	0.0651629072682	0.0130841121495	0.0023768366465
FBgn0010431	0.0325814536341	0.015873015873	0.0401869158879	0.0392648287385	0.0140186915888	0.0691588785047	0.0651629072682	0.0130841121495	0.0023768366465
FBgn0033439	0.0198555956679	0.00180505415162	0.00715071507151	0.00361010830325	0.0	0.00715071507151	0.0228640192539	0.001100110011	0.0023768366465
FBgn0015550	0.0325814536341	0.015873015873	0.0401869158879	0.0392648287385	0.0140186915888	0.0691588785047	0.0651629072682	0.0130841121495	0.0023768366465
FBgn0033981	0.0198555956679	0.00180505415162	0.00715071507151	0.00361010830325	0.0	0.00715071507151	0.0228640192539	0.001100110011	0.0023768366465
FBgn0038243	0.0325814536341	0.015873015873	0.0401869158879	0.0392648287385	0.0140186915888	0.0691588785047	0.0651629072682	0.0130841121495	0.0023768366465
FBgn0051233	0.0198555956679	0.00180505415162	0.00715071507151	0.00361010830325	0.0	0.00715071507151	0.0228640192539	0.001100110011	0.0023768366465
FBgn0036379	0.0198555956679	0.00180505415162	0.0401869158879	0.00361010830325	0.0140186915888	0.0691588785047	0.0228640192539	0.0130841121495	0.0023768366465
FBgn0033574	0.0198555956679	0.00180505415162	0.00715071507151	0.00361010830325	0.0	0.00715071507151	0.0228640192539	0.001100110011	0.0023768366465
FBgn0036373	0.00282007896221	0.00112803158488	0.00630733944954	0.00338409475465	0.00286697247706	0.00974770642202	0.00507614213198	0.00172018348624	0.0023768366465
FBgn0033980	0.0198555956679	0.00180505415162	0.00715071507151	0.00361010830325	0.0	0.00715071507151	0.0228640192539	0.001100110011	0.0023768366465
FBgn0036377	0.0198555956679	0.00180505415162	0.00715071507151	0.00361010830325	0.0	0.00715071507151	0.0228640192539	0.001100110011	0.0023768366465
FBgn0051908	0.00282007896221	0.00112803158488	0.00630733944954	0.00338409475465	0.00286697247706	0.00974770642202	0.00507614213198	0.00172018348624	0.0023768366465
FBgn0035034	0.0325814536341	0.015873015873	0.00715071507151	0.0392648287385	0.0	0.00715071507151	0.0651629072682	0.001100110011	0.0023768366465
FBgn0026566	0.00282007896221	0.00112803158488	0.00630733944954	0.00338409475465	0.00286697247706	0.00974770642202	0.00507614213198	0.00172018348624	0.0023768366465
FBgn0005614	0.0198555956679	0.00180505415162	0.00715071507151	0.00361010830325	0.0	0.00715071507151	0.0228640192539	0.001100110011	0.0023768366465
FBgn0005616	0.00282007896221	0.00112803158488	0.00630733944954	0.00338409475465	0.00286697247706	0.00974770642202	0.00507614213198	0.00172018348624	0.0023768366465
FBgn0005617	0.00282007896221	0.00112803158488	0.00630733944954	0.00338409475465	0.00286697247706	0.00974770642202	0.00507614213198	0.00172018348624	0.0023768366465
FBgn0000370	0.00282007896221	0.00112803158488	0.00630733944954	0.00338409475465	0.00286697247706	0.00974770642202	0.00507614213198	0.00172018348624	0.0023768366465
FBgn0035872	0.00282007896221	0.00112803158488	0.00630733944954	0.00338409475465	0.00286697247706	0.00974770642202	0.00507614213198	0.00172018348624	0.0023768366465
FBgn0028646	0.0325814536341	0.015873015873	0.00715071507151	0.0392648287385	0.0	0.00715071507151	0.0651629072682	0.001100110011	0.0023768366465
FBgn0028644	0.0198555956679	0.00180505415162	0.00715071507151	0.00361010830325	0.0	0.00715071507151	0.0228640192539	0.001100110011	0.0023768366465
FBgn0028645	0.0198555956679	0.00180505415162	0.00715071507151	0.00361010830325	0.0	0.00715071507151	0.0228640192539	0.001100110011	0.0023768366465
FBgn0028648	0.00282007896221	0.00112803158488	0.00630733944954	0.00338409475465	0.00286697247706	0.00974770642202	0.00507614213198	0.00172018348624	0.0023768366465
FBgn0025549	0.00282007896221	0.00112803158488	0.00630733944954	0.00338409475465	0.00286697247706	0.00974770642202	0.00507614213198	0.00172018348624	0.0023768366465
FBgn0032478	0.0198555956679	0.00180505415162	0.0401869158879	0.00361010830325	0.0140186915888	0.0691588785047	0.0228640192539	0.0130841121495	0.0023768366465
FBgn0032476	0.00282007896221	0.00112803158488	0.00630733944954	0.00338409475465	0.00286697247706	0.00974770642202	0.00507614213198	0.00172018348624	0.0023768366465
FBgn0032477	0.00282007896221	0.00112803158488	0.00630733944954	0.00338409475465	0.00286697247706	0.00974770642202	0.00507614213198	0.00172018348624	0.0023768366465
FBgn0032475	0.00282007896221	0.00112803158488	0.00630733944954	0.00338409475465	0.00286697247706	0.00974770642202	0.00507614213198	0.00172018348624	0.0023768366465
FBgn0032472	0.0198555956679	0.00180505415162	0.00715071507151	0.00361010830325	0.0	0.00715071507151	0.0228640192539	0.001100110011	0.0023768366465
FBgn0003046	0.0198555956679	0.00180505415162	0.00715071507151	0.00361010830325	0.0	0.00715071507151	0.0228640192539	0.001100110011	0.0023768366465
FBgn0003513	0.0198555956679	0.00180505415162	0.0401869158879	0.00361010830325	0.0140186915888	0.0691588785047	0.0228640192539	0.0130841121495	0.0023768366465
FBgn0003515	0.0325814536341	0.015873015873	0.00715071507151	0.0392648287385	0.0	0.00715071507151	0.0651629072682	0.001100110011	0.0023768366465
FBgn0035296	0.0198555956679	0.00180505415162	0.00715071507151	0.00361010830325	0.0	0.00715071507151	0.0228640192539	0.001100110011	0.0023768366465
FBgn0035294	0.00282007896221	0.00112803158488	0.00630733944954	0.00338409475465	0.00286697247706	0.00974770642202	0.00507614213198	0.00172018348624	0.0023768366465
FBgn0052598	0.0198555956679	0.00180505415162	0.00715071507151	0.00361010830325	0.0	0.00715071507151	0.0228640192539	0.001100110011	0.0023768366465
FBgn0052594	0.00282007896221	0.00112803158488	0.0401869158879	0.00338409475465	0.0140186915888	0.0691588785047	0.00507614213198	0.0130841121495	0.0023768366465
FBgn0035207	0.00282007896221	0.00112803158488	0.00630733944954	0.00338409475465	0.00286697247706	0.00974770642202	0.00507614213198	0.00172018348624	0.0023768366465
FBgn0038405	0.0198555956679	0.00180505415162	0.00715071507151	0.00361010830325	0.0	0.00715071507151	0.0228640192539	0.001100110011	0.0023768366465
FBgn0035124	0.0198555956679	0.00180505415162	0.00715071507151	0.00361010830325	0.0	0.00715071507151	0.0228640192539	0.001100110011	0.0023768366465
FBgn0038407	0.0198555956679	0.00180505415162	0.00715071507151	0.00361010830325	0.0	0.00715071507151	0.0228640192539	0.001100110011	0.0023768366465
FBgn0035121	0.00282007896221	0.00112803158488	0.00630733944954	0.00338409475465	0.00286697247706	0.00974770642202	0.00507614213198	0.00172018348624	0.0023768366465
FBgn0035122	0.00282007896221	0.00112803158488	0.00630733944954	0.00338409475465	0.00286697247706	0.00974770642202	0.00507614213198	0.00172018348624	0.0023768366465
FBgn0031979	0.00282007896221	0.00112803158488	0.00630733944954	0.00338409475465	0.00286697247706	0.00974770642202	0.00507614213198	0.00172018348624	0.0023768366465
FBgn0031972	0.0325814536341	0.015873015873	0.00630733944954	0.0392648287385	0.00286697247706	0.00974770642202	0.0651629072682	0.00172018348624	0.0023768366465
FBgn0031970	0.0325814536341	0.015873015873	0.00715071507151	0.0392648287385	0.0	0.00715071507151	0.0651629072682	0.001100110011	0.0023768366465
FBgn0031971	0.00282007896221	0.00112803158488	0.00630733944954	0.00338409475465	0.00286697247706	0.00974770642202	0.00507614213198	0.00172018348624	0.0023768366465
FBgn0031975	0.0198555956679	0.00180505415162	0.00715071507151	0.00361010830325	0.0	0.00715071507151	0.0228640192539	0.001100110011	0.0023768366465
FBgn0034186	0.00282007896221	0.00112803158488	0.00630733944954	0.00338409475465	0.00286697247706	0.00974770642202	0.00507614213198	0.00172018348624	0.0023768366465
FBgn0038749	0.0198555956679	0.00180505415162	0.00715071507151	0.00361010830325	0.0	0.00715071507151	0.0228640192539	0.001100110011	0.0023768366465
FBgn0034181	0.00282007896221	0.00112803158488	0.00630733944954	0.00338409475465	0.00286697247706	0.00974770642202	0.00507614213198	0.00172018348624	0.0023768366465
FBgn0038742	0.0325814536341	0.015873015873	0.00630733944954	0.0392648287385	0.00286697247706	0.00974770642202	0.0651629072682	0.00172018348624	0.0023768366465
FBgn0038747	0.00282007896221	0.00112803158488	0.00630733944954	0.00338409475465	0.00286697247706	0.00974770642202	0.00507614213198	0.00172018348624	0.0023768366465
FBgn0038745	0.0325814536341	0.015873015873	0.0401869158879	0.0392648287385	0.0140186915888	0.0691588785047	0.0651629072682	0.0130841121495	0.0023768366465
FBgn0030511	0.0325814536341	0.015873015873	0.0401869158879	0.0392648287385	0.0140186915888	0.0691588785047	0.0651629072682	0.0130841121495	0.0023768366465
FBgn0036967	0.00282007896221	0.00112803158488	0.00630733944954	0.00338409475465	0.00286697247706	0.00974770642202	0.00507614213198	0.00172018348624	0.0023768366465
FBgn0019650	0.0325814536341	0.015873015873	0.0401869158879	0.0392648287385	0.0140186915888	0.0691588785047	0.0651629072682	0.0130841121495	0.0023768366465
FBgn0036111	0.00282007896221	0.00112803158488	0.00630733944954	0.00338409475465	0.00286697247706	0.00974770642202	0.00507614213198	0.00172018348624	0.0023768366465
FBgn0031608	0.00282007896221	0.00112803158488	0.00630733944954	0.00338409475465	0.00286697247706	0.00974770642202	0.00507614213198	0.00172018348624	0.0023768366465
FBgn0034989	0.00282007896221	0.00112803158488	0.00630733944954	0.00338409475465	0.00286697247706	0.00974770642202	0.00507614213198	0.00172018348624	0.0023768366465
FBgn0010229	0.00282007896221	0.00112803158488	0.00630733944954	0.00338409475465	0.00286697247706	0.00974770642202	0.00507614213198	0.00172018348624	0.0023768366465
FBgn0010225	0.0325814536341	0.015873015873	0.0401869158879	0.0392648287385	0.0140186915888	0.0691588785047	0.0651629072682	0.0130841121495	0.0023768366465
FBgn0010222	0.00282007896221	0.00112803158488	0.0401869158879	0.00338409475465	0.0140186915888	0.0691588785047	0.00507614213198	0.0130841121495	0.0023768366465
FBgn0031606	0.00282007896221	0.00112803158488	0.00630733944954	0.00338409475465	0.00286697247706	0.00974770642202	0.00507614213198	0.00172018348624	0.0023768366465
FBgn0010220	0.00282007896221	0.00112803158488	0.00630733944954	0.00338409475465	0.00286697247706	0.00974770642202	0.00507614213198	0.00172018348624	0.0023768366465
FBgn0051739	0.00282007896221	0.00112803158488	0.00630733944954	0.00338409475465	0.00286697247706	0.00974770642202	0.00507614213198	0.00172018348624	0.0023768366465
FBgn0037188	0.00282007896221	0.00112803158488	0.00630733944954	0.00338409475465	0.00286697247706	0.00974770642202	0.00507614213198	0.00172018348624	0.0023768366465
FBgn0051223	0.0325814536341	0.015873015873	0.0401869158879	0.0392648287385	0.0140186915888	0.0691588785047	0.0651629072682	0.0130841121495	0.0023768366465
FBgn0026577	0.00282007896221	0.00112803158488	0.00630733944954	0.00338409475465	0.00286697247706	0.00974770642202	0.00507614213198	0.00172018348624	0.0023768366465
FBgn0037185	0.0325814536341	0.015873015873	0.00630733944954	0.0392648287385	0.00286697247706	0.00974770642202	0.0651629072682	0.00172018348624	0.0023768366465
FBgn0026573	0.00282007896221	0.00112803158488	0.00630733944954	0.00338409475465	0.00286697247706	0.00974770642202	0.00507614213198	0.00172018348624	0.0023768366465
FBgn0026570	0.0198555956679	0.00180505415162	0.00715071507151	0.00361010830325	0.0	0.00715071507151	0.0228640192539	0.001100110011	0.0023768366465
FBgn0037186	0.0325814536341	0.015873015873	0.0401869158879	0.0392648287385	0.0140186915888	0.0691588785047	0.0651629072682	0.0130841121495	0.0023768366465
FBgn0000346	0.0325814536341	0.015873015873	0.00715071507151	0.0392648287385	0.0	0.00715071507151	0.0651629072682	0.001100110011	0.0023768366465
FBgn0039433	0.0198555956679	0.00180505415162	0.00715071507151	0.00361010830325	0.0	0.00715071507151	0.0228640192539	0.001100110011	0.0023768366465
FBgn0039430	0.0325814536341	0.015873015873	0.00715071507151	0.0392648287385	0.0	0.00715071507151	0.0651629072682	0.001100110011	0.0023768366465
FBgn0039437	0.0198555956679	0.00180505415162	0.00715071507151	0.00361010830325	0.0	0.00715071507151	0.0228640192539	0.001100110011	0.0023768366465
FBgn0039436	0.0198555956679	0.00180505415162	0.00715071507151	0.00361010830325	0.0	0.00715071507151	0.0228640192539	0.001100110011	0.0023768366465
FBgn0039435	0.0198555956679	0.00180505415162	0.00715071507151	0.00361010830325	0.0	0.00715071507151	0.0228640192539	0.001100110011	0.0023768366465
FBgn0039434	0.0198555956679	0.00180505415162	0.00715071507151	0.00361010830325	0.0	0.00715071507151	0.0228640192539	0.001100110011	0.0023768366465
FBgn0032111	0.0198555956679	0.00180505415162	0.00715071507151	0.00361010830325	0.0	0.00715071507151	0.0228640192539	0.001100110011	0.0023768366465
FBgn0032116	0.0198555956679	0.00180505415162	0.00715071507151	0.00361010830325	0.0	0.00715071507151	0.0228640192539	0.001100110011	0.0023768366465
FBgn0038498	0.0198555956679	0.00180505415162	0.00715071507151	0.00361010830325	0.0	0.00715071507151	0.0228640192539	0.001100110011	0.0023768366465
FBgn0043455	0.00282007896221	0.00112803158488	0.00630733944954	0.00338409475465	0.00286697247706	0.00974770642202	0.00507614213198	0.00172018348624	0.0023768366465
FBgn0038499	0.00282007896221	0.00112803158488	0.00630733944954	0.00338409475465	0.00286697247706	0.00974770642202	0.00507614213198	0.00172018348624	0.0023768366465
FBgn0037766	0.0198555956679	0.00180505415162	0.00715071507151	0.00361010830325	0.0	0.00715071507151	0.0228640192539	0.001100110011	0.0023768366465
FBgn0037760	0.00282007896221	0.00112803158488	0.00630733944954	0.00338409475465	0.00286697247706	0.00974770642202	0.00507614213198	0.00172018348624	0.0023768366465
FBgn0037763	0.0198555956679	0.00180505415162	0.00715071507151	0.00361010830325	0.0	0.00715071507151	0.0228640192539	0.001100110011	0.0023768366465
FBgn0032801	0.00282007896221	0.00112803158488	0.00630733944954	0.00338409475465	0.00286697247706	0.00974770642202	0.00507614213198	0.00172018348624	0.0023768366465
FBgn0032800	0.0325814536341	0.015873015873	0.0401869158879	0.0392648287385	0.0140186915888	0.0691588785047	0.0651629072682	0.0130841121495	0.0023768366465
FBgn0050172	0.0325814536341	0.015873015873	0.0401869158879	0.0392648287385	0.0140186915888	0.0691588785047	0.0651629072682	0.0130841121495	0.0023768366465
FBgn0020506	0.0198555956679	0.00180505415162	0.00715071507151	0.00361010830325	0.0	0.00715071507151	0.0228640192539	0.001100110011	0.0023768366465
FBgn0003870	0.00282007896221	0.00112803158488	0.00630733944954	0.00338409475465	0.00286697247706	0.00974770642202	0.00507614213198	0.00172018348624	0.0023768366465
FBgn0031030	0.00282007896221	0.00112803158488	0.00630733944954	0.00338409475465	0.00286697247706	0.00974770642202	0.00507614213198	0.00172018348624	0.0023768366465
FBgn0030467	0.00282007896221	0.00112803158488	0.00630733944954	0.00338409475465	0.00286697247706	0.00974770642202	0.00507614213198	0.00172018348624	0.0023768366465
FBgn0030465	0.00282007896221	0.00112803158488	0.00630733944954	0.00338409475465	0.00286697247706	0.00974770642202	0.00507614213198	0.00172018348624	0.0023768366465
FBgn0024558	0.00282007896221	0.00112803158488	0.00630733944954	0.00338409475465	0.00286697247706	0.00974770642202	0.00507614213198	0.00172018348624	0.0023768366465
FBgn0035461	0.0325814536341	0.015873015873	0.0401869158879	0.0392648287385	0.0140186915888	0.0691588785047	0.0651629072682	0.0130841121495	0.0023768366465
FBgn0035462	0.00282007896221	0.00112803158488	0.00630733944954	0.00338409475465	0.00286697247706	0.00974770642202	0.00507614213198	0.00172018348624	0.0023768366465
FBgn0020642	0.0198555956679	0.00180505415162	0.00715071507151	0.00361010830325	0.0	0.00715071507151	0.0228640192539	0.001100110011	0.0023768366465
FBgn0020643	0.0198555956679	0.00180505415162	0.00715071507151	0.00361010830325	0.0	0.00715071507151	0.0228640192539	0.001100110011	0.0023768366465
FBgn0020641	0.0198555956679	0.00180505415162	0.00715071507151	0.00361010830325	0.0	0.00715071507151	0.0228640192539	0.001100110011	0.0023768366465
FBgn0033602	0.0198555956679	0.00180505415162	0.00715071507151	0.00361010830325	0.0	0.00715071507151	0.0228640192539	0.001100110011	0.0023768366465
FBgn0033607	0.00282007896221	0.00112803158488	0.00630733944954	0.00338409475465	0.00286697247706	0.00974770642202	0.00507614213198	0.00172018348624	0.0023768366465
FBgn0024889	0.00282007896221	0.00112803158488	0.00630733944954	0.00338409475465	0.00286697247706	0.00974770642202	0.00507614213198	0.00172018348624	0.0023768366465
FBgn0030606	0.00282007896221	0.00112803158488	0.00630733944954	0.00338409475465	0.00286697247706	0.00974770642202	0.00507614213198	0.00172018348624	0.0023768366465
FBgn0040823	0.0198555956679	0.00180505415162	0.00715071507151	0.00361010830325	0.0	0.00715071507151	0.0228640192539	0.001100110011	0.0023768366465
FBgn0052102	0.0198555956679	0.00180505415162	0.0401869158879	0.00361010830325	0.0140186915888	0.0691588785047	0.0228640192539	0.0130841121495	0.0023768366465
FBgn0052105	0.0198555956679	0.00180505415162	0.0401869158879	0.00361010830325	0.0140186915888	0.0691588785047	0.0228640192539	0.0130841121495	0.0023768366465
FBgn0025680	0.0198555956679	0.00180505415162	0.00715071507151	0.00361010830325	0.0	0.00715071507151	0.0228640192539	0.001100110011	0.0023768366465
FBgn0025683	0.0325814536341	0.015873015873	0.0401869158879	0.0392648287385	0.0140186915888	0.0691588785047	0.0651629072682	0.0130841121495	0.0023768366465
FBgn0014022	0.00282007896221	0.00112803158488	0.00630733944954	0.00338409475465	0.00286697247706	0.00974770642202	0.00507614213198	0.00172018348624	0.0023768366465
FBgn0034564	0.00282007896221	0.00112803158488	0.00630733944954	0.00338409475465	0.00286697247706	0.00974770642202	0.00507614213198	0.00172018348624	0.0023768366465
FBgn0043470	0.0198555956679	0.00180505415162	0.00715071507151	0.00361010830325	0.0	0.00715071507151	0.0228640192539	0.001100110011	0.0023768366465
FBgn0010173	0.0325814536341	0.015873015873	0.00630733944954	0.0392648287385	0.00286697247706	0.00974770642202	0.0651629072682	0.00172018348624	0.0023768366465
FBgn0030608	0.0325814536341	0.015873015873	0.0401869158879	0.0392648287385	0.0140186915888	0.0691588785047	0.0651629072682	0.0130841121495	0.0023768366465
FBgn0003187	0.0325814536341	0.015873015873	0.0401869158879	0.0392648287385	0.0140186915888	0.0691588785047	0.0651629072682	0.0130841121495	0.0023768366465
FBgn0037974	0.0198555956679	0.00180505415162	0.00715071507151	0.00361010830325	0.0	0.00715071507151	0.0228640192539	0.001100110011	0.0023768366465
FBgn0037975	0.0198555956679	0.00180505415162	0.00715071507151	0.00361010830325	0.0	0.00715071507151	0.0228640192539	0.001100110011	0.0023768366465
FBgn0037976	0.0198555956679	0.00180505415162	0.00715071507151	0.00361010830325	0.0	0.00715071507151	0.0228640192539	0.001100110011	0.0023768366465
FBgn0000578	0.00282007896221	0.00112803158488	0.00630733944954	0.00338409475465	0.00286697247706	0.00974770642202	0.00507614213198	0.00172018348624	0.0023768366465
FBgn0000577	0.0325814536341	0.015873015873	0.0401869158879	0.0392648287385	0.0140186915888	0.0691588785047	0.0651629072682	0.0130841121495	0.0023768366465
FBgn0037063	0.0325814536341	0.015873015873	0.0401869158879	0.0392648287385	0.0140186915888	0.0691588785047	0.0651629072682	0.0130841121495	0.0023768366465
FBgn0039601	0.00282007896221	0.00112803158488	0.00630733944954	0.00338409475465	0.00286697247706	0.00974770642202	0.00507614213198	0.00172018348624	0.0023768366465
FBgn0030724	0.0325814536341	0.015873015873	0.0401869158879	0.0392648287385	0.0140186915888	0.0691588785047	0.0651629072682	0.0130841121495	0.0023768366465
FBgn0030720	0.00282007896221	0.00112803158488	0.00630733944954	0.00338409475465	0.00286697247706	0.00974770642202	0.00507614213198	0.00172018348624	0.0023768366465
FBgn0030721	0.0325814536341	0.015873015873	0.0401869158879	0.0392648287385	0.0140186915888	0.0691588785047	0.0651629072682	0.0130841121495	0.0023768366465
FBgn0030723	0.0198555956679	0.00180505415162	0.00715071507151	0.00361010830325	0.0	0.00715071507151	0.0228640192539	0.001100110011	0.0023768366465
FBgn0029905	0.00282007896221	0.00112803158488	0.00630733944954	0.00338409475465	0.00286697247706	0.00974770642202	0.00507614213198	0.00172018348624	0.0023768366465
FBgn0029909	0.0198555956679	0.00180505415162	0.00715071507151	0.00361010830325	0.0	0.00715071507151	0.0228640192539	0.001100110011	0.0023768366465
FBgn0051032	0.0325814536341	0.015873015873	0.00630733944954	0.0392648287385	0.00286697247706	0.00974770642202	0.0651629072682	0.00172018348624	0.0023768366465
FBgn0051036	0.0198555956679	0.00180505415162	0.00715071507151	0.00361010830325	0.0	0.00715071507151	0.0228640192539	0.001100110011	0.0023768366465
FBgn0051038	0.0325814536341	0.015873015873	0.0401869158879	0.0392648287385	0.0140186915888	0.0691588785047	0.0651629072682	0.0130841121495	0.0023768366465
FBgn0050342	0.00282007896221	0.00112803158488	0.00630733944954	0.00338409475465	0.00286697247706	0.00974770642202	0.00507614213198	0.00172018348624	0.0023768366465
FBgn0050344	0.00282007896221	0.00112803158488	0.00630733944954	0.00338409475465	0.00286697247706	0.00974770642202	0.00507614213198	0.00172018348624	0.0023768366465
FBgn0027504	0.00282007896221	0.00112803158488	0.00630733944954	0.00338409475465	0.00286697247706	0.00974770642202	0.00507614213198	0.00172018348624	0.0023768366465
FBgn0027506	0.00282007896221	0.00112803158488	0.0401869158879	0.00338409475465	0.0140186915888	0.0691588785047	0.00507614213198	0.0130841121495	0.0023768366465
FBgn0027507	0.00282007896221	0.00112803158488	0.00630733944954	0.00338409475465	0.00286697247706	0.00974770642202	0.00507614213198	0.00172018348624	0.0023768366465
FBgn0027503	0.00282007896221	0.00112803158488	0.00630733944954	0.00338409475465	0.00286697247706	0.00974770642202	0.00507614213198	0.00172018348624	0.0023768366465
FBgn0029822	0.00282007896221	0.00112803158488	0.00630733944954	0.00338409475465	0.00286697247706	0.00974770642202	0.00507614213198	0.00172018348624	0.0023768366465
FBgn0028902	0.0198555956679	0.00180505415162	0.00715071507151	0.00361010830325	0.0	0.00715071507151	0.0228640192539	0.001100110011	0.0023768366465
FBgn0052843	0.0198555956679	0.00180505415162	0.00715071507151	0.00361010830325	0.0	0.00715071507151	0.0228640192539	0.001100110011	0.0023768366465
FBgn0032848	0.00282007896221	0.00112803158488	0.00630733944954	0.00338409475465	0.00286697247706	0.00974770642202	0.00507614213198	0.00172018348624	0.0023768366465
FBgn0037518	0.0325814536341	0.015873015873	0.00715071507151	0.0392648287385	0.0	0.00715071507151	0.0651629072682	0.001100110011	0.0023768366465
FBgn0030239	0.00282007896221	0.00112803158488	0.00630733944954	0.00338409475465	0.00286697247706	0.00974770642202	0.00507614213198	0.00172018348624	0.0023768366465
FBgn0037513	0.0325814536341	0.015873015873	0.00715071507151	0.0392648287385	0.0	0.00715071507151	0.0651629072682	0.001100110011	0.0023768366465
FBgn0030237	0.0325814536341	0.015873015873	0.0401869158879	0.0392648287385	0.0140186915888	0.0691588785047	0.0651629072682	0.0130841121495	0.0023768366465
FBgn0030234	0.0198555956679	0.00180505415162	0.0401869158879	0.00361010830325	0.0140186915888	0.0691588785047	0.0228640192539	0.0130841121495	0.0023768366465
FBgn0030235	0.0325814536341	0.015873015873	0.0401869158879	0.0392648287385	0.0140186915888	0.0691588785047	0.0651629072682	0.0130841121495	0.0023768366465
FBgn0024912	0.0325814536341	0.015873015873	0.0401869158879	0.0392648287385	0.0140186915888	0.0691588785047	0.0651629072682	0.0130841121495	0.0023768366465
FBgn0033457	0.00282007896221	0.00112803158488	0.00630733944954	0.00338409475465	0.00286697247706	0.00974770642202	0.00507614213198	0.00172018348624	0.0023768366465
FBgn0033452	0.00282007896221	0.00112803158488	0.00630733944954	0.00338409475465	0.00286697247706	0.00974770642202	0.00507614213198	0.00172018348624	0.0023768366465
FBgn0033451	0.0198555956679	0.00180505415162	0.0401869158879	0.00361010830325	0.0140186915888	0.0691588785047	0.0228640192539	0.0130841121495	0.0023768366465
FBgn0038269	0.00282007896221	0.00112803158488	0.00630733944954	0.00338409475465	0.00286697247706	0.00974770642202	0.00507614213198	0.00172018348624	0.0023768366465
FBgn0051698	0.0198555956679	0.00180505415162	0.00715071507151	0.00361010830325	0.0	0.00715071507151	0.0228640192539	0.001100110011	0.0023768366465
FBgn0040732	0.0198555956679	0.00180505415162	0.00715071507151	0.00361010830325	0.0	0.00715071507151	0.0228640192539	0.001100110011	0.0023768366465
FBgn0038266	0.0198555956679	0.00180505415162	0.00715071507151	0.00361010830325	0.0	0.00715071507151	0.0228640192539	0.001100110011	0.0023768366465
FBgn0035020	0.00282007896221	0.00112803158488	0.00630733944954	0.00338409475465	0.00286697247706	0.00974770642202	0.00507614213198	0.00172018348624	0.0023768366465
FBgn0035021	0.00282007896221	0.00112803158488	0.00630733944954	0.00338409475465	0.00286697247706	0.00974770642202	0.00507614213198	0.00172018348624	0.0023768366465
FBgn0035022	0.0198555956679	0.00180505415162	0.00715071507151	0.00361010830325	0.0	0.00715071507151	0.0228640192539	0.001100110011	0.0023768366465
FBgn0005586	0.0325814536341	0.015873015873	0.00715071507151	0.0392648287385	0.0	0.00715071507151	0.0651629072682	0.001100110011	0.0023768366465
FBgn0036390	0.0198555956679	0.00180505415162	0.00715071507151	0.00361010830325	0.0	0.00715071507151	0.0228640192539	0.001100110011	0.0023768366465
FBgn0036396	0.0325814536341	0.015873015873	0.00630733944954	0.0392648287385	0.00286697247706	0.00974770642202	0.0651629072682	0.00172018348624	0.0023768366465
FBgn0036395	0.00282007896221	0.00112803158488	0.00630733944954	0.00338409475465	0.00286697247706	0.00974770642202	0.00507614213198	0.00172018348624	0.0023768366465
FBgn0035027	0.00282007896221	0.00112803158488	0.00630733944954	0.00338409475465	0.00286697247706	0.00974770642202	0.00507614213198	0.00172018348624	0.0023768366465
FBgn0004181	0.0198555956679	0.00180505415162	0.00715071507151	0.00361010830325	0.0	0.00715071507151	0.0228640192539	0.001100110011	0.0023768366465
FBgn0029506	0.00282007896221	0.00112803158488	0.00630733944954	0.00338409475465	0.00286697247706	0.00974770642202	0.00507614213198	0.00172018348624	0.0023768366465
FBgn0023507	0.0325814536341	0.015873015873	0.0401869158879	0.0392648287385	0.0140186915888	0.0691588785047	0.0651629072682	0.0130841121495	0.0023768366465
FBgn0023508	0.00282007896221	0.00112803158488	0.00630733944954	0.00338409475465	0.00286697247706	0.00974770642202	0.00507614213198	0.00172018348624	0.0023768366465
FBgn0023509	0.00282007896221	0.00112803158488	0.00630733944954	0.00338409475465	0.00286697247706	0.00974770642202	0.00507614213198	0.00172018348624	0.0023768366465
FBgn0035853	0.00282007896221	0.00112803158488	0.00630733944954	0.00338409475465	0.00286697247706	0.00974770642202	0.00507614213198	0.00172018348624	0.0023768366465
FBgn0035852	0.0325814536341	0.015873015873	0.0401869158879	0.0392648287385	0.0140186915888	0.0691588785047	0.0651629072682	0.0130841121495	0.0023768366465
FBgn0035855	0.0198555956679	0.00180505415162	0.00715071507151	0.00361010830325	0.0	0.00715071507151	0.0228640192539	0.001100110011	0.0023768366465
FBgn0035857	0.0198555956679	0.00180505415162	0.00715071507151	0.00361010830325	0.0	0.00715071507151	0.0228640192539	0.001100110011	0.0023768366465
FBgn0035856	0.0198555956679	0.00180505415162	0.00715071507151	0.00361010830325	0.0	0.00715071507151	0.0228640192539	0.001100110011	0.0023768366465
FBgn0035859	0.0198555956679	0.00180505415162	0.00715071507151	0.00361010830325	0.0	0.00715071507151	0.0228640192539	0.001100110011	0.0023768366465
FBgn0028622	0.0325814536341	0.015873015873	0.0401869158879	0.0392648287385	0.0140186915888	0.0691588785047	0.0651629072682	0.0130841121495	0.0023768366465
FBgn0032494	0.0198555956679	0.00180505415162	0.00715071507151	0.00361010830325	0.0	0.00715071507151	0.0228640192539	0.001100110011	0.0023768366465
FBgn0032495	0.0198555956679	0.00180505415162	0.00715071507151	0.00361010830325	0.0	0.00715071507151	0.0228640192539	0.001100110011	0.0023768366465
FBgn0032840	0.0198555956679	0.00180505415162	0.00715071507151	0.00361010830325	0.0	0.00715071507151	0.0228640192539	0.001100110011	0.0023768366465
FBgn0053196	0.0325814536341	0.015873015873	0.0401869158879	0.0392648287385	0.0140186915888	0.0691588785047	0.0651629072682	0.0130841121495	0.0023768366465
FBgn0036117	0.00282007896221	0.00112803158488	0.0401869158879	0.00338409475465	0.0140186915888	0.0691588785047	0.00507614213198	0.0130841121495	0.0023768366465
FBgn0053191	0.0198555956679	0.00180505415162	0.00715071507151	0.00361010830325	0.0	0.00715071507151	0.0228640192539	0.001100110011	0.0023768366465
FBgn0053193	0.00282007896221	0.00112803158488	0.00630733944954	0.00338409475465	0.00286697247706	0.00974770642202	0.00507614213198	0.00172018348624	0.0023768366465
FBgn0005636	0.0325814536341	0.015873015873	0.0401869158879	0.0392648287385	0.0140186915888	0.0691588785047	0.0651629072682	0.0130841121495	0.0023768366465
FBgn0005632	0.00282007896221	0.00112803158488	0.0401869158879	0.00338409475465	0.0140186915888	0.0691588785047	0.00507614213198	0.0130841121495	0.0023768366465
FBgn0005633	0.0325814536341	0.015873015873	0.00715071507151	0.0392648287385	0.0	0.00715071507151	0.0651629072682	0.001100110011	0.0023768366465
FBgn0005630	0.00282007896221	0.00112803158488	0.00630733944954	0.00338409475465	0.00286697247706	0.00974770642202	0.00507614213198	0.00172018348624	0.0023768366465
FBgn0003065	0.0198555956679	0.00180505415162	0.00715071507151	0.00361010830325	0.0	0.00715071507151	0.0228640192539	0.001100110011	0.0023768366465
FBgn0003067	0.0198555956679	0.00180505415162	0.0401869158879	0.00361010830325	0.0140186915888	0.0691588785047	0.0228640192539	0.0130841121495	0.0023768366465
FBgn0031435	0.0325814536341	0.015873015873	0.0401869158879	0.0392648287385	0.0140186915888	0.0691588785047	0.0651629072682	0.0130841121495	0.0023768366465
FBgn0029573	0.0198555956679	0.00180505415162	0.0401869158879	0.00361010830325	0.0140186915888	0.0691588785047	0.0228640192539	0.0130841121495	0.0023768366465
FBgn0022073	0.0325814536341	0.015873015873	0.0401869158879	0.0392648287385	0.0140186915888	0.0691588785047	0.0651629072682	0.0130841121495	0.0023768366465
FBgn0028862	0.0325814536341	0.015873015873	0.0401869158879	0.0392648287385	0.0140186915888	0.0691588785047	0.0651629072682	0.0130841121495	0.0023768366465
FBgn0031434	0.0325814536341	0.015873015873	0.0401869158879	0.0392648287385	0.0140186915888	0.0691588785047	0.0651629072682	0.0130841121495	0.0023768366465
FBgn0035147	0.00282007896221	0.00112803158488	0.00630733944954	0.00338409475465	0.00286697247706	0.00974770642202	0.00507614213198	0.00172018348624	0.0023768366465
FBgn0020368	0.00282007896221	0.00112803158488	0.00630733944954	0.00338409475465	0.00286697247706	0.00974770642202	0.00507614213198	0.00172018348624	0.0023768366465
FBgn0039509	0.00282007896221	0.00112803158488	0.00630733944954	0.00338409475465	0.00286697247706	0.00974770642202	0.00507614213198	0.00172018348624	0.0023768366465
FBgn0020367	0.00282007896221	0.00112803158488	0.0401869158879	0.00338409475465	0.0140186915888	0.0691588785047	0.00507614213198	0.0130841121495	0.0023768366465
FBgn0035148	0.00282007896221	0.00112803158488	0.00630733944954	0.00338409475465	0.00286697247706	0.00974770642202	0.00507614213198	0.00172018348624	0.0023768366465
FBgn0024321	0.0198555956679	0.00180505415162	0.00715071507151	0.00361010830325	0.0	0.00715071507151	0.0228640192539	0.001100110011	0.0023768366465
FBgn0014184	0.00282007896221	0.00112803158488	0.00630733944954	0.00338409475465	0.00286697247706	0.00974770642202	0.00507614213198	0.00172018348624	0.0023768366465
FBgn0031918	0.0198555956679	0.00180505415162	0.00715071507151	0.00361010830325	0.0	0.00715071507151	0.0228640192539	0.001100110011	0.0023768366465
FBgn0034439	0.0198555956679	0.00180505415162	0.00715071507151	0.00361010830325	0.0	0.00715071507151	0.0228640192539	0.001100110011	0.0023768366465
FBgn0034436	0.0325814536341	0.015873015873	0.0401869158879	0.0392648287385	0.0140186915888	0.0691588785047	0.0651629072682	0.0130841121495	0.0023768366465
FBgn0031910	0.0198555956679	0.00180505415162	0.00715071507151	0.00361010830325	0.0	0.00715071507151	0.0228640192539	0.001100110011	0.0023768366465
FBgn0031913	0.0325814536341	0.015873015873	0.0401869158879	0.0392648287385	0.0140186915888	0.0691588785047	0.0651629072682	0.0130841121495	0.0023768366465
FBgn0036704	0.0198555956679	0.00180505415162	0.00715071507151	0.00361010830325	0.0	0.00715071507151	0.0228640192539	0.001100110011	0.0023768366465
FBgn0038720	0.0325814536341	0.015873015873	0.0401869158879	0.0392648287385	0.0140186915888	0.0691588785047	0.0651629072682	0.0130841121495	0.0023768366465
FBgn0036706	0.0198555956679	0.00180505415162	0.00715071507151	0.00361010830325	0.0	0.00715071507151	0.0228640192539	0.001100110011	0.0023768366465
FBgn0038722	0.00282007896221	0.00112803158488	0.00630733944954	0.00338409475465	0.00286697247706	0.00974770642202	0.00507614213198	0.00172018348624	0.0023768366465
FBgn0038723	0.0325814536341	0.015873015873	0.0401869158879	0.0392648287385	0.0140186915888	0.0691588785047	0.0651629072682	0.0130841121495	0.0023768366465
FBgn0030537	0.0198555956679	0.00180505415162	0.00715071507151	0.00361010830325	0.0	0.00715071507151	0.0228640192539	0.001100110011	0.0023768366465
FBgn0030536	0.0198555956679	0.00180505415162	0.00715071507151	0.00361010830325	0.0	0.00715071507151	0.0228640192539	0.001100110011	0.0023768366465
FBgn0036941	0.0198555956679	0.00180505415162	0.00715071507151	0.00361010830325	0.0	0.00715071507151	0.0228640192539	0.001100110011	0.0023768366465
FBgn0015321	0.00282007896221	0.00112803158488	0.0401869158879	0.00338409475465	0.0140186915888	0.0691588785047	0.00507614213198	0.0130841121495	0.0023768366465
FBgn0031621	0.0198555956679	0.00180505415162	0.00715071507151	0.00361010830325	0.0	0.00715071507151	0.0228640192539	0.001100110011	0.0023768366465
FBgn0015324	0.00282007896221	0.00112803158488	0.00630733944954	0.00338409475465	0.00286697247706	0.00974770642202	0.00507614213198	0.00172018348624	0.0023768366465
FBgn0031629	0.0325814536341	0.015873015873	0.00715071507151	0.0392648287385	0.0	0.00715071507151	0.0651629072682	0.001100110011	0.0023768366465
FBgn0038095	0.0198555956679	0.00180505415162	0.00715071507151	0.00361010830325	0.0	0.00715071507151	0.0228640192539	0.001100110011	0.0023768366465
FBgn0039354	0.0198555956679	0.00180505415162	0.00715071507151	0.00361010830325	0.0	0.00715071507151	0.0228640192539	0.001100110011	0.0023768366465
FBgn0038098	0.0198555956679	0.00180505415162	0.00715071507151	0.00361010830325	0.0	0.00715071507151	0.0228640192539	0.001100110011	0.0023768366465
FBgn0038099	0.0198555956679	0.00180505415162	0.00715071507151	0.00361010830325	0.0	0.00715071507151	0.0228640192539	0.001100110011	0.0023768366465
FBgn0039352	0.00282007896221	0.00112803158488	0.00630733944954	0.00338409475465	0.00286697247706	0.00974770642202	0.00507614213198	0.00172018348624	0.0023768366465
FBgn0031453	0.00282007896221	0.00112803158488	0.00630733944954	0.00338409475465	0.00286697247706	0.00974770642202	0.00507614213198	0.00172018348624	0.0023768366465
FBgn0032029	0.0325814536341	0.015873015873	0.0401869158879	0.0392648287385	0.0140186915888	0.0691588785047	0.0651629072682	0.0130841121495	0.0023768366465
FBgn0031320	0.00282007896221	0.00112803158488	0.00630733944954	0.00338409475465	0.00286697247706	0.00974770642202	0.00507614213198	0.00172018348624	0.0023768366465
FBgn0031327	0.0198555956679	0.00180505415162	0.00715071507151	0.00361010830325	0.0	0.00715071507151	0.0228640192539	0.001100110011	0.0023768366465
FBgn0040385	0.0325814536341	0.015873015873	0.0401869158879	0.0392648287385	0.0140186915888	0.0691588785047	0.0651629072682	0.0130841121495	0.0023768366465
FBgn0051759	0.0325814536341	0.015873015873	0.00715071507151	0.0392648287385	0.0	0.00715071507151	0.0651629072682	0.001100110011	0.0023768366465
FBgn0040383	0.0198555956679	0.00180505415162	0.0401869158879	0.00361010830325	0.0140186915888	0.0691588785047	0.0228640192539	0.0130841121495	0.0023768366465
FBgn0040382	0.00282007896221	0.00112803158488	0.00630733944954	0.00338409475465	0.00286697247706	0.00974770642202	0.00507614213198	0.00172018348624	0.0023768366465
FBgn0051207	0.0198555956679	0.00180505415162	0.00715071507151	0.00361010830325	0.0	0.00715071507151	0.0228640192539	0.001100110011	0.0023768366465
FBgn0040388	0.00282007896221	0.00112803158488	0.00630733944954	0.00338409475465	0.00286697247706	0.00974770642202	0.00507614213198	0.00172018348624	0.0023768366465
FBgn0037163	0.0198555956679	0.00180505415162	0.00715071507151	0.00361010830325	0.0	0.00715071507151	0.0228640192539	0.001100110011	0.0023768366465
FBgn0026592	0.0325814536341	0.015873015873	0.00715071507151	0.0392648287385	0.0	0.00715071507151	0.0651629072682	0.001100110011	0.0023768366465
FBgn0026593	0.0198555956679	0.00180505415162	0.00715071507151	0.00361010830325	0.0	0.00715071507151	0.0228640192539	0.001100110011	0.0023768366465
FBgn0030398	0.0198555956679	0.00180505415162	0.00715071507151	0.00361010830325	0.0	0.00715071507151	0.0228640192539	0.001100110011	0.0023768366465
FBgn0037165	0.0198555956679	0.00180505415162	0.00715071507151	0.00361010830325	0.0	0.00715071507151	0.0228640192539	0.001100110011	0.0023768366465
FBgn0030394	0.0325814536341	0.015873015873	0.00715071507151	0.0392648287385	0.0	0.00715071507151	0.0651629072682	0.001100110011	0.0023768366465
FBgn0037169	0.0198555956679	0.00180505415162	0.00715071507151	0.00361010830325	0.0	0.00715071507151	0.0228640192539	0.001100110011	0.0023768366465
FBgn0000326	0.0325814536341	0.015873015873	0.0401869158879	0.0392648287385	0.0140186915888	0.0691588785047	0.0651629072682	0.0130841121495	0.0023768366465
FBgn0000320	0.0325814536341	0.015873015873	0.0401869158879	0.0392648287385	0.0140186915888	0.0691588785047	0.0651629072682	0.0130841121495	0.0023768366465
FBgn0016983	0.00282007896221	0.00112803158488	0.00630733944954	0.00338409475465	0.00286697247706	0.00974770642202	0.00507614213198	0.00172018348624	0.0023768366465
FBgn0016984	0.00282007896221	0.00112803158488	0.00630733944954	0.00338409475465	0.00286697247706	0.00974770642202	0.00507614213198	0.00172018348624	0.0023768366465
FBgn0033842	0.00282007896221	0.00112803158488	0.00630733944954	0.00338409475465	0.00286697247706	0.00974770642202	0.00507614213198	0.00172018348624	0.0023768366465
FBgn0039417	0.00282007896221	0.00112803158488	0.0401869158879	0.00338409475465	0.0140186915888	0.0691588785047	0.00507614213198	0.0130841121495	0.0023768366465
FBgn0037705	0.00282007896221	0.00112803158488	0.00630733944954	0.00338409475465	0.00286697247706	0.00974770642202	0.00507614213198	0.00172018348624	0.0023768366465
FBgn0030323	0.00282007896221	0.00112803158488	0.0401869158879	0.00338409475465	0.0140186915888	0.0691588785047	0.00507614213198	0.0130841121495	0.0023768366465
FBgn0037700	0.00282007896221	0.00112803158488	0.00630733944954	0.00338409475465	0.00286697247706	0.00974770642202	0.00507614213198	0.00172018348624	0.0023768366465
FBgn0037709	0.00282007896221	0.00112803158488	0.00630733944954	0.00338409475465	0.00286697247706	0.00974770642202	0.00507614213198	0.00172018348624	0.0023768366465
FBgn0037708	0.0325814536341	0.015873015873	0.0401869158879	0.0392648287385	0.0140186915888	0.0691588785047	0.0651629072682	0.0130841121495	0.0023768366465
FBgn0030326	0.0198555956679	0.00180505415162	0.00715071507151	0.00361010830325	0.0	0.00715071507151	0.0228640192539	0.001100110011	0.0023768366465
FBgn0030327	0.00282007896221	0.00112803158488	0.00630733944954	0.00338409475465	0.00286697247706	0.00974770642202	0.00507614213198	0.00172018348624	0.0023768366465
FBgn0031141	0.0198555956679	0.00180505415162	0.00715071507151	0.00361010830325	0.0	0.00715071507151	0.0228640192539	0.001100110011	0.0023768366465
FBgn0004510	0.00282007896221	0.00112803158488	0.00630733944954	0.00338409475465	0.00286697247706	0.00974770642202	0.00507614213198	0.00172018348624	0.0023768366465
FBgn0004512	0.0198555956679	0.00180505415162	0.0401869158879	0.00361010830325	0.0140186915888	0.0691588785047	0.0228640192539	0.0130841121495	0.0023768366465
FBgn0004513	0.0198555956679	0.00180505415162	0.00715071507151	0.00361010830325	0.0	0.00715071507151	0.0228640192539	0.001100110011	0.0023768366465
FBgn0004047	0.0198555956679	0.00180505415162	0.0401869158879	0.00361010830325	0.0140186915888	0.0691588785047	0.0228640192539	0.0130841121495	0.0023768366465
FBgn0004516	0.0325814536341	0.015873015873	0.00715071507151	0.0392648287385	0.0	0.00715071507151	0.0651629072682	0.001100110011	0.0023768366465
FBgn0004045	0.0198555956679	0.00180505415162	0.00715071507151	0.00361010830325	0.0	0.00715071507151	0.0228640192539	0.001100110011	0.0023768366465
FBgn0034315	0.00282007896221	0.00112803158488	0.00630733944954	0.00338409475465	0.00286697247706	0.00974770642202	0.00507614213198	0.00172018348624	0.0023768366465
FBgn0034314	0.0325814536341	0.015873015873	0.0401869158879	0.0392648287385	0.0140186915888	0.0691588785047	0.0651629072682	0.0130841121495	0.0023768366465
FBgn0050403	0.0325814536341	0.015873015873	0.00715071507151	0.0392648287385	0.0	0.00715071507151	0.0651629072682	0.001100110011	0.0023768366465
FBgn0050158	0.0198555956679	0.00180505415162	0.00715071507151	0.00361010830325	0.0	0.00715071507151	0.0228640192539	0.001100110011	0.0023768366465
FBgn0050404	0.00282007896221	0.00112803158488	0.00630733944954	0.00338409475465	0.00286697247706	0.00974770642202	0.00507614213198	0.00172018348624	0.0023768366465
FBgn0050151	0.0198555956679	0.00180505415162	0.00715071507151	0.00361010830325	0.0	0.00715071507151	0.0228640192539	0.001100110011	0.0023768366465
FBgn0003896	0.0325814536341	0.015873015873	0.0401869158879	0.0392648287385	0.0140186915888	0.0691588785047	0.0651629072682	0.0130841121495	0.0023768366465
FBgn0011236	0.0325814536341	0.015873015873	0.0401869158879	0.0392648287385	0.0140186915888	0.0691588785047	0.0651629072682	0.0130841121495	0.0023768366465
FBgn0020626	0.00282007896221	0.00112803158488	0.00630733944954	0.00338409475465	0.00286697247706	0.00974770642202	0.00507614213198	0.00172018348624	0.0023768366465
FBgn0020620	0.00282007896221	0.00112803158488	0.00630733944954	0.00338409475465	0.00286697247706	0.00974770642202	0.00507614213198	0.00172018348624	0.0023768366465
FBgn0020622	0.00282007896221	0.00112803158488	0.00630733944954	0.00338409475465	0.00286697247706	0.00974770642202	0.00507614213198	0.00172018348624	0.0023768366465
FBgn0020623	0.0198555956679	0.00180505415162	0.00715071507151	0.00361010830325	0.0	0.00715071507151	0.0228640192539	0.001100110011	0.0023768366465
FBgn0033667	0.0198555956679	0.00180505415162	0.00715071507151	0.00361010830325	0.0	0.00715071507151	0.0228640192539	0.001100110011	0.0023768366465
FBgn0011581	0.0198555956679	0.00180505415162	0.00715071507151	0.00361010830325	0.0	0.00715071507151	0.0228640192539	0.001100110011	0.0023768366465
FBgn0033668	0.0325814536341	0.015873015873	0.00715071507151	0.0392648287385	0.0	0.00715071507151	0.0651629072682	0.001100110011	0.0023768366465
FBgn0033669	0.00282007896221	0.00112803158488	0.00630733944954	0.00338409475465	0.00286697247706	0.00974770642202	0.00507614213198	0.00172018348624	0.0023768366465
FBgn0032393	0.0325814536341	0.015873015873	0.0401869158879	0.0392648287385	0.0140186915888	0.0691588785047	0.0651629072682	0.0130841121495	0.0023768366465
FBgn0032390	0.00282007896221	0.00112803158488	0.00630733944954	0.00338409475465	0.00286697247706	0.00974770642202	0.00507614213198	0.00172018348624	0.0023768366465
FBgn0035626	0.0325814536341	0.015873015873	0.0401869158879	0.0392648287385	0.0140186915888	0.0691588785047	0.0651629072682	0.0130841121495	0.0023768366465
FBgn0035627	0.0325814536341	0.015873015873	0.00630733944954	0.0392648287385	0.00286697247706	0.00974770642202	0.0651629072682	0.00172018348624	0.0023768366465
FBgn0035625	0.0325814536341	0.015873015873	0.0401869158879	0.0392648287385	0.0140186915888	0.0691588785047	0.0651629072682	0.0130841121495	0.0023768366465
FBgn0035622	0.00282007896221	0.00112803158488	0.00630733944954	0.00338409475465	0.00286697247706	0.00974770642202	0.00507614213198	0.00172018348624	0.0023768366465
FBgn0035623	0.0325814536341	0.015873015873	0.00715071507151	0.0392648287385	0.0	0.00715071507151	0.0651629072682	0.001100110011	0.0023768366465
FBgn0035620	0.0198555956679	0.00180505415162	0.00715071507151	0.00361010830325	0.0	0.00715071507151	0.0228640192539	0.001100110011	0.0023768366465
FBgn0003514	0.00282007896221	0.00112803158488	0.00630733944954	0.00338409475465	0.00286697247706	0.00974770642202	0.00507614213198	0.00172018348624	0.0023768366465
FBgn0003517	0.00282007896221	0.00112803158488	0.00630733944954	0.00338409475465	0.00286697247706	0.00974770642202	0.00507614213198	0.00172018348624	0.0023768366465
FBgn0013725	0.0325814536341	0.015873015873	0.0401869158879	0.0392648287385	0.0140186915888	0.0691588785047	0.0651629072682	0.0130841121495	0.0023768366465
FBgn0002023	0.0325814536341	0.015873015873	0.00715071507151	0.0392648287385	0.0	0.00715071507151	0.0651629072682	0.001100110011	0.0023768366465
FBgn0037556	0.00282007896221	0.00112803158488	0.00630733944954	0.00338409475465	0.00286697247706	0.00974770642202	0.00507614213198	0.00172018348624	0.0023768366465
FBgn0039259	0.00282007896221	0.00112803158488	0.00630733944954	0.00338409475465	0.00286697247706	0.00974770642202	0.00507614213198	0.00172018348624	0.0023768366465
FBgn0032538	0.0198555956679	0.00180505415162	0.00715071507151	0.00361010830325	0.0	0.00715071507151	0.0228640192539	0.001100110011	0.0023768366465
FBgn0032283	0.0198555956679	0.00180505415162	0.00715071507151	0.00361010830325	0.0	0.00715071507151	0.0228640192539	0.001100110011	0.0023768366465
FBgn0039251	0.0198555956679	0.00180505415162	0.00715071507151	0.00361010830325	0.0	0.00715071507151	0.0228640192539	0.001100110011	0.0023768366465
FBgn0039254	0.00282007896221	0.00112803158488	0.00630733944954	0.00338409475465	0.00286697247706	0.00974770642202	0.00507614213198	0.00172018348624	0.0023768366465
FBgn0029749	0.0198555956679	0.00180505415162	0.00715071507151	0.00361010830325	0.0	0.00715071507151	0.0228640192539	0.001100110011	0.0023768366465
FBgn0037958	0.00282007896221	0.00112803158488	0.00630733944954	0.00338409475465	0.00286697247706	0.00974770642202	0.00507614213198	0.00172018348624	0.0023768366465
FBgn0003308	0.0325814536341	0.015873015873	0.0401869158879	0.0392648287385	0.0140186915888	0.0691588785047	0.0651629072682	0.0130841121495	0.0023768366465
FBgn0039629	0.0198555956679	0.00180505415162	0.00715071507151	0.00361010830325	0.0	0.00715071507151	0.0228640192539	0.001100110011	0.0023768366465
FBgn0003300	0.0325814536341	0.015873015873	0.0401869158879	0.0392648287385	0.0140186915888	0.0691588785047	0.0651629072682	0.0130841121495	0.0023768366465
FBgn0003302	0.00282007896221	0.00112803158488	0.00630733944954	0.00338409475465	0.00286697247706	0.00974770642202	0.00507614213198	0.00172018348624	0.0023768366465
FBgn0039626	0.00282007896221	0.00112803158488	0.00630733944954	0.00338409475465	0.00286697247706	0.00974770642202	0.00507614213198	0.00172018348624	0.0023768366465
FBgn0039625	0.0325814536341	0.015873015873	0.00630733944954	0.0392648287385	0.00286697247706	0.00974770642202	0.0651629072682	0.00172018348624	0.0023768366465
FBgn0001145	0.0198555956679	0.00180505415162	0.0401869158879	0.00361010830325	0.0140186915888	0.0691588785047	0.0228640192539	0.0130841121495	0.0023768366465
FBgn0023444	0.00282007896221	0.00112803158488	0.00630733944954	0.00338409475465	0.00286697247706	0.00974770642202	0.00507614213198	0.00172018348624	0.0023768366465
FBgn0015024	0.00282007896221	0.00112803158488	0.00630733944954	0.00338409475465	0.00286697247706	0.00974770642202	0.00507614213198	0.00172018348624	0.0023768366465
FBgn0016641	0.00282007896221	0.00112803158488	0.00630733944954	0.00338409475465	0.00286697247706	0.00974770642202	0.00507614213198	0.00172018348624	0.0023768366465
FBgn0032336	0.0198555956679	0.00180505415162	0.00715071507151	0.00361010830325	0.0	0.00715071507151	0.0228640192539	0.001100110011	0.0023768366465
FBgn0029969	0.00282007896221	0.00112803158488	0.0401869158879	0.00338409475465	0.0140186915888	0.0691588785047	0.00507614213198	0.0130841121495	0.0023768366465
FBgn0010269	0.00282007896221	0.00112803158488	0.00630733944954	0.00338409475465	0.00286697247706	0.00974770642202	0.00507614213198	0.00172018348624	0.0023768366465
FBgn0027526	0.00282007896221	0.00112803158488	0.00630733944954	0.00338409475465	0.00286697247706	0.00974770642202	0.00507614213198	0.00172018348624	0.0023768366465
FBgn0027527	0.0198555956679	0.00180505415162	0.00715071507151	0.00361010830325	0.0	0.00715071507151	0.0228640192539	0.001100110011	0.0023768366465
FBgn0027524	0.00282007896221	0.00112803158488	0.00630733944954	0.00338409475465	0.00286697247706	0.00974770642202	0.00507614213198	0.00172018348624	0.0023768366465
FBgn0027525	0.00282007896221	0.00112803158488	0.00630733944954	0.00338409475465	0.00286697247706	0.00974770642202	0.00507614213198	0.00172018348624	0.0023768366465
FBgn0027521	0.0325814536341	0.015873015873	0.00630733944954	0.0392648287385	0.00286697247706	0.00974770642202	0.0651629072682	0.00172018348624	0.0023768366465
FBgn0034378	0.0198555956679	0.00180505415162	0.00715071507151	0.00361010830325	0.0	0.00715071507151	0.0228640192539	0.001100110011	0.0023768366465
FBgn0034372	0.00282007896221	0.00112803158488	0.00630733944954	0.00338409475465	0.00286697247706	0.00974770642202	0.00507614213198	0.00172018348624	0.0023768366465
FBgn0034371	0.0325814536341	0.015873015873	0.0401869158879	0.0392648287385	0.0140186915888	0.0691588785047	0.0651629072682	0.0130841121495	0.0023768366465
FBgn0034374	0.0198555956679	0.00180505415162	0.00715071507151	0.00361010830325	0.0	0.00715071507151	0.0228640192539	0.001100110011	0.0023768366465
FBgn0030259	0.0198555956679	0.00180505415162	0.00715071507151	0.00361010830325	0.0	0.00715071507151	0.0228640192539	0.001100110011	0.0023768366465
FBgn0036951	0.0198555956679	0.00180505415162	0.00715071507151	0.00361010830325	0.0	0.00715071507151	0.0228640192539	0.001100110011	0.0023768366465
FBgn0030704	0.00282007896221	0.00112803158488	0.00630733944954	0.00338409475465	0.00286697247706	0.00974770642202	0.00507614213198	0.00172018348624	0.0023768366465
FBgn0037572	0.0198555956679	0.00180505415162	0.0401869158879	0.00361010830325	0.0140186915888	0.0691588785047	0.0228640192539	0.0130841121495	0.0023768366465
FBgn0037573	0.00282007896221	0.00112803158488	0.00630733944954	0.00338409475465	0.00286697247706	0.00974770642202	0.00507614213198	0.00172018348624	0.0023768366465
FBgn0033471	0.00282007896221	0.00112803158488	0.00630733944954	0.00338409475465	0.00286697247706	0.00974770642202	0.00507614213198	0.00172018348624	0.0023768366465
FBgn0036152	0.0198555956679	0.00180505415162	0.0401869158879	0.00361010830325	0.0140186915888	0.0691588785047	0.0228640192539	0.0130841121495	0.0023768366465
FBgn0033475	0.0325814536341	0.015873015873	0.0401869158879	0.0392648287385	0.0140186915888	0.0691588785047	0.0651629072682	0.0130841121495	0.0023768366465
FBgn0033474	0.00282007896221	0.00112803158488	0.00630733944954	0.00338409475465	0.00286697247706	0.00974770642202	0.00507614213198	0.00172018348624	0.0023768366465
FBgn0033477	0.00282007896221	0.00112803158488	0.00630733944954	0.00338409475465	0.00286697247706	0.00974770642202	0.00507614213198	0.00172018348624	0.0023768366465
FBgn0015040	0.0198555956679	0.00180505415162	0.00715071507151	0.00361010830325	0.0	0.00715071507151	0.0228640192539	0.001100110011	0.0023768366465
FBgn0026438	0.0198555956679	0.00180505415162	0.00715071507151	0.00361010830325	0.0	0.00715071507151	0.0228640192539	0.001100110011	0.0023768366465
FBgn0026433	0.00282007896221	0.00112803158488	0.00630733944954	0.00338409475465	0.00286697247706	0.00974770642202	0.00507614213198	0.00172018348624	0.0023768366465
FBgn0026432	0.00282007896221	0.00112803158488	0.00630733944954	0.00338409475465	0.00286697247706	0.00974770642202	0.00507614213198	0.00172018348624	0.0023768366465
FBgn0026431	0.0325814536341	0.015873015873	0.00630733944954	0.0392648287385	0.00286697247706	0.00974770642202	0.0651629072682	0.00172018348624	0.0023768366465
FBgn0026430	0.00282007896221	0.00112803158488	0.00630733944954	0.00338409475465	0.00286697247706	0.00974770642202	0.00507614213198	0.00172018348624	0.0023768366465
FBgn0050362	0.0198555956679	0.00180505415162	0.00715071507151	0.00361010830325	0.0	0.00715071507151	0.0228640192539	0.001100110011	0.0023768366465
FBgn0031478	0.00282007896221	0.00112803158488	0.00630733944954	0.00338409475465	0.00286697247706	0.00974770642202	0.00507614213198	0.00172018348624	0.0023768366465
FBgn0021800	0.0325814536341	0.015873015873	0.0401869158879	0.0392648287385	0.0140186915888	0.0691588785047	0.0651629072682	0.0130841121495	0.0023768366465
FBgn0030873	0.00282007896221	0.00112803158488	0.00630733944954	0.00338409475465	0.00286697247706	0.00974770642202	0.00507614213198	0.00172018348624	0.0023768366465
FBgn0030874	0.00282007896221	0.00112803158488	0.00630733944954	0.00338409475465	0.00286697247706	0.00974770642202	0.00507614213198	0.00172018348624	0.0023768366465
FBgn0030877	0.00282007896221	0.00112803158488	0.00630733944954	0.00338409475465	0.00286697247706	0.00974770642202	0.00507614213198	0.00172018348624	0.0023768366465
FBgn0050090	0.0198555956679	0.00180505415162	0.00715071507151	0.00361010830325	0.0	0.00715071507151	0.0228640192539	0.001100110011	0.0023768366465
FBgn0032700	0.00282007896221	0.00112803158488	0.00630733944954	0.00338409475465	0.00286697247706	0.00974770642202	0.00507614213198	0.00172018348624	0.0023768366465
FBgn0023529	0.00282007896221	0.00112803158488	0.00630733944954	0.00338409475465	0.00286697247706	0.00974770642202	0.00507614213198	0.00172018348624	0.0023768366465
FBgn0032705	0.00282007896221	0.00112803158488	0.00630733944954	0.00338409475465	0.00286697247706	0.00974770642202	0.00507614213198	0.00172018348624	0.0023768366465
FBgn0023522	0.00282007896221	0.00112803158488	0.00630733944954	0.00338409475465	0.00286697247706	0.00974770642202	0.00507614213198	0.00172018348624	0.0023768366465
FBgn0023521	0.00282007896221	0.00112803158488	0.00630733944954	0.00338409475465	0.00286697247706	0.00974770642202	0.00507614213198	0.00172018348624	0.0023768366465
FBgn0023526	0.00282007896221	0.00112803158488	0.00630733944954	0.00338409475465	0.00286697247706	0.00974770642202	0.00507614213198	0.00172018348624	0.0023768366465
FBgn0023525	0.0325814536341	0.015873015873	0.0401869158879	0.0392648287385	0.0140186915888	0.0691588785047	0.0651629072682	0.0130841121495	0.0023768366465
FBgn0035551	0.0198555956679	0.00180505415162	0.00715071507151	0.00361010830325	0.0	0.00715071507151	0.0228640192539	0.001100110011	0.0023768366465
FBgn0035886	0.0198555956679	0.00180505415162	0.00715071507151	0.00361010830325	0.0	0.00715071507151	0.0228640192539	0.001100110011	0.0023768366465
FBgn0038401	0.00282007896221	0.00112803158488	0.00630733944954	0.00338409475465	0.00286697247706	0.00974770642202	0.00507614213198	0.00172018348624	0.0023768366465
FBgn0035557	0.0198555956679	0.00180505415162	0.00715071507151	0.00361010830325	0.0	0.00715071507151	0.0228640192539	0.001100110011	0.0023768366465
FBgn0001269	0.0325814536341	0.015873015873	0.0401869158879	0.0392648287385	0.0140186915888	0.0691588785047	0.0651629072682	0.0130841121495	0.0023768366465
FBgn0001263	0.0198555956679	0.00180505415162	0.00715071507151	0.00361010830325	0.0	0.00715071507151	0.0228640192539	0.001100110011	0.0023768366465
FBgn0032350	0.0198555956679	0.00180505415162	0.00715071507151	0.00361010830325	0.0	0.00715071507151	0.0228640192539	0.001100110011	0.0023768366465
FBgn0024273	0.00282007896221	0.00112803158488	0.00630733944954	0.00338409475465	0.00286697247706	0.00974770642202	0.00507614213198	0.00172018348624	0.0023768366465
FBgn0033367	0.0198555956679	0.00180505415162	0.00715071507151	0.00361010830325	0.0	0.00715071507151	0.0228640192539	0.001100110011	0.0023768366465
FBgn0029003	0.0325814536341	0.015873015873	0.0401869158879	0.0392648287385	0.0140186915888	0.0691588785047	0.0651629072682	0.0130841121495	0.0023768366465
FBgn0022724	0.00282007896221	0.00112803158488	0.00630733944954	0.00338409475465	0.00286697247706	0.00974770642202	0.00507614213198	0.00172018348624	0.0023768366465
FBgn0035169	0.00282007896221	0.00112803158488	0.00630733944954	0.00338409475465	0.00286697247706	0.00974770642202	0.00507614213198	0.00172018348624	0.0023768366465
FBgn0030817	0.0198555956679	0.00180505415162	0.00715071507151	0.00361010830325	0.0	0.00715071507151	0.0228640192539	0.001100110011	0.0023768366465
FBgn0035165	0.00282007896221	0.00112803158488	0.00630733944954	0.00338409475465	0.00286697247706	0.00974770642202	0.00507614213198	0.00172018348624	0.0023768366465
FBgn0035167	0.0325814536341	0.015873015873	0.0401869158879	0.0392648287385	0.0140186915888	0.0691588785047	0.0651629072682	0.0130841121495	0.0023768366465
FBgn0020381	0.00282007896221	0.00112803158488	0.00630733944954	0.00338409475465	0.00286697247706	0.00974770642202	0.00507614213198	0.00172018348624	0.0023768366465
FBgn0033159	0.0325814536341	0.015873015873	0.0401869158879	0.0392648287385	0.0140186915888	0.0691588785047	0.0651629072682	0.0130841121495	0.0023768366465
FBgn0020386	0.0325814536341	0.015873015873	0.00630733944954	0.0392648287385	0.00286697247706	0.00974770642202	0.0651629072682	0.00172018348624	0.0023768366465
FBgn0020389	0.00282007896221	0.00112803158488	0.0401869158879	0.00338409475465	0.0140186915888	0.0691588785047	0.00507614213198	0.0130841121495	0.0023768366465
FBgn0033368	0.0198555956679	0.00180505415162	0.00715071507151	0.00361010830325	0.0	0.00715071507151	0.0228640192539	0.001100110011	0.0023768366465
FBgn0024285	0.00282007896221	0.00112803158488	0.00630733944954	0.00338409475465	0.00286697247706	0.00974770642202	0.00507614213198	0.00172018348624	0.0023768366465
FBgn0030810	0.0198555956679	0.00180505415162	0.00715071507151	0.00361010830325	0.0	0.00715071507151	0.0228640192539	0.001100110011	0.0023768366465
FBgn0034453	0.00282007896221	0.00112803158488	0.00630733944954	0.00338409475465	0.00286697247706	0.00974770642202	0.00507614213198	0.00172018348624	0.0023768366465
FBgn0031393	0.0198555956679	0.00180505415162	0.0401869158879	0.00361010830325	0.0140186915888	0.0691588785047	0.0228640192539	0.0130841121495	0.0023768366465
FBgn0031397	0.0325814536341	0.015873015873	0.00715071507151	0.0392648287385	0.0	0.00715071507151	0.0651629072682	0.001100110011	0.0023768366465
FBgn0031395	0.00282007896221	0.00112803158488	0.00630733944954	0.00338409475465	0.00286697247706	0.00974770642202	0.00507614213198	0.00172018348624	0.0023768366465
FBgn0031428	0.00282007896221	0.00112803158488	0.00630733944954	0.00338409475465	0.00286697247706	0.00974770642202	0.00507614213198	0.00172018348624	0.0023768366465
FBgn0031398	0.00282007896221	0.00112803158488	0.00630733944954	0.00338409475465	0.00286697247706	0.00974770642202	0.00507614213198	0.00172018348624	0.0023768366465
FBgn0034418	0.00282007896221	0.00112803158488	0.00630733944954	0.00338409475465	0.00286697247706	0.00974770642202	0.00507614213198	0.00172018348624	0.0023768366465
FBgn0038700	0.0198555956679	0.00180505415162	0.00715071507151	0.00361010830325	0.0	0.00715071507151	0.0228640192539	0.001100110011	0.0023768366465
FBgn0038701	0.0198555956679	0.00180505415162	0.00715071507151	0.00361010830325	0.0	0.00715071507151	0.0228640192539	0.001100110011	0.0023768366465
FBgn0038708	0.0325814536341	0.015873015873	0.00715071507151	0.0392648287385	0.0	0.00715071507151	0.0651629072682	0.001100110011	0.0023768366465
FBgn0038709	0.0198555956679	0.00180505415162	0.00715071507151	0.00361010830325	0.0	0.00715071507151	0.0228640192539	0.001100110011	0.0023768366465
FBgn0052373	0.0198555956679	0.00180505415162	0.00715071507151	0.00361010830325	0.0	0.00715071507151	0.0228640192539	0.001100110011	0.0023768366465
FBgn0052372	0.0325814536341	0.015873015873	0.0401869158879	0.0392648287385	0.0140186915888	0.0691588785047	0.0651629072682	0.0130841121495	0.0023768366465
FBgn0034187	0.00282007896221	0.00112803158488	0.0401869158879	0.00338409475465	0.0140186915888	0.0691588785047	0.00507614213198	0.0130841121495	0.0023768366465
FBgn0010825	0.00282007896221	0.00112803158488	0.00630733944954	0.00338409475465	0.00286697247706	0.00974770642202	0.00507614213198	0.00172018348624	0.0023768366465
FBgn0031644	0.0198555956679	0.00180505415162	0.00715071507151	0.00361010830325	0.0	0.00715071507151	0.0228640192539	0.001100110011	0.0023768366465
FBgn0010774	0.00282007896221	0.00112803158488	0.00630733944954	0.00338409475465	0.00286697247706	0.00974770642202	0.00507614213198	0.00172018348624	0.0023768366465
FBgn0031646	0.0198555956679	0.00180505415162	0.00715071507151	0.00361010830325	0.0	0.00715071507151	0.0228640192539	0.001100110011	0.0023768366465
FBgn0026602	0.0325814536341	0.015873015873	0.00715071507151	0.0392648287385	0.0	0.00715071507151	0.0651629072682	0.001100110011	0.0023768366465
FBgn0047199	0.0198555956679	0.00180505415162	0.00715071507151	0.00361010830325	0.0	0.00715071507151	0.0228640192539	0.001100110011	0.0023768366465
FBgn0000568	0.0325814536341	0.015873015873	0.0401869158879	0.0392648287385	0.0140186915888	0.0691588785047	0.0651629072682	0.0130841121495	0.0023768366465
FBgn0000658	0.0325814536341	0.015873015873	0.0401869158879	0.0392648287385	0.0140186915888	0.0691588785047	0.0651629072682	0.0130841121495	0.0023768366465
FBgn0025807	0.00282007896221	0.00112803158488	0.00630733944954	0.00338409475465	0.00286697247706	0.00974770642202	0.00507614213198	0.00172018348624	0.0023768366465
FBgn0000303	0.0325814536341	0.015873015873	0.00715071507151	0.0392648287385	0.0	0.00715071507151	0.0651629072682	0.001100110011	0.0023768366465
FBgn0000307	0.00282007896221	0.00112803158488	0.00630733944954	0.00338409475465	0.00286697247706	0.00974770642202	0.00507614213198	0.00172018348624	0.0023768366465
FBgn0011280	0.0198555956679	0.00180505415162	0.0401869158879	0.00361010830325	0.0140186915888	0.0691588785047	0.0228640192539	0.0130841121495	0.0023768366465
FBgn0011286	0.0325814536341	0.015873015873	0.0401869158879	0.0392648287385	0.0140186915888	0.0691588785047	0.0651629072682	0.0130841121495	0.0023768366465
FBgn0033867	0.0198555956679	0.00180505415162	0.00715071507151	0.00361010830325	0.0	0.00715071507151	0.0228640192539	0.001100110011	0.0023768366465
FBgn0033865	0.0198555956679	0.00180505415162	0.00715071507151	0.00361010830325	0.0	0.00715071507151	0.0228640192539	0.001100110011	0.0023768366465
FBgn0039476	0.0198555956679	0.00180505415162	0.00715071507151	0.00361010830325	0.0	0.00715071507151	0.0228640192539	0.001100110011	0.0023768366465
FBgn0039475	0.0198555956679	0.00180505415162	0.00715071507151	0.00361010830325	0.0	0.00715071507151	0.0228640192539	0.001100110011	0.0023768366465
FBgn0039474	0.0198555956679	0.00180505415162	0.00715071507151	0.00361010830325	0.0	0.00715071507151	0.0228640192539	0.001100110011	0.0023768366465
FBgn0039473	0.0198555956679	0.00180505415162	0.00715071507151	0.00361010830325	0.0	0.00715071507151	0.0228640192539	0.001100110011	0.0023768366465
FBgn0039471	0.0198555956679	0.00180505415162	0.00715071507151	0.00361010830325	0.0	0.00715071507151	0.0228640192539	0.001100110011	0.0023768366465
FBgn0039470	0.0198555956679	0.00180505415162	0.00715071507151	0.00361010830325	0.0	0.00715071507151	0.0228640192539	0.001100110011	0.0023768366465
FBgn0035771	0.00282007896221	0.00112803158488	0.00630733944954	0.00338409475465	0.00286697247706	0.00974770642202	0.00507614213198	0.00172018348624	0.0023768366465
FBgn0037721	0.0198555956679	0.00180505415162	0.00715071507151	0.00361010830325	0.0	0.00715071507151	0.0228640192539	0.001100110011	0.0023768366465
FBgn0037723	0.0325814536341	0.015873015873	0.0401869158879	0.0392648287385	0.0140186915888	0.0691588785047	0.0651629072682	0.0130841121495	0.0023768366465
FBgn0037727	0.0198555956679	0.00180505415162	0.00715071507151	0.00361010830325	0.0	0.00715071507151	0.0228640192539	0.001100110011	0.0023768366465
FBgn0031574	0.0325814536341	0.015873015873	0.0401869158879	0.0392648287385	0.0140186915888	0.0691588785047	0.0651629072682	0.0130841121495	0.0023768366465
FBgn0036422	0.0198555956679	0.00180505415162	0.00715071507151	0.00361010830325	0.0	0.00715071507151	0.0228640192539	0.001100110011	0.0023768366465
FBgn0004028	0.0325814536341	0.015873015873	0.00715071507151	0.0392648287385	0.0	0.00715071507151	0.0651629072682	0.001100110011	0.0023768366465
FBgn0020545	0.00282007896221	0.00112803158488	0.00630733944954	0.00338409475465	0.00286697247706	0.00974770642202	0.00507614213198	0.00172018348624	0.0023768366465
FBgn0033397	0.0198555956679	0.00180505415162	0.00715071507151	0.00361010830325	0.0	0.00715071507151	0.0228640192539	0.001100110011	0.0023768366465
FBgn0033391	0.00282007896221	0.00112803158488	0.0401869158879	0.00338409475465	0.0140186915888	0.0691588785047	0.00507614213198	0.0130841121495	0.0023768366465
FBgn0033392	0.00282007896221	0.00112803158488	0.00630733944954	0.00338409475465	0.00286697247706	0.00974770642202	0.00507614213198	0.00172018348624	0.0023768366465
FBgn0038197	0.0325814536341	0.015873015873	0.0401869158879	0.0392648287385	0.0140186915888	0.0691588785047	0.0651629072682	0.0130841121495	0.0023768366465
FBgn0035428	0.0198555956679	0.00180505415162	0.00715071507151	0.00361010830325	0.0	0.00715071507151	0.0228640192539	0.001100110011	0.0023768366465
FBgn0035429	0.0325814536341	0.015873015873	0.00715071507151	0.0392648287385	0.0	0.00715071507151	0.0651629072682	0.001100110011	0.0023768366465
FBgn0024510	0.00282007896221	0.00112803158488	0.00630733944954	0.00338409475465	0.00286697247706	0.00974770642202	0.00507614213198	0.00172018348624	0.0023768366465
FBgn0035425	0.00282007896221	0.00112803158488	0.00630733944954	0.00338409475465	0.00286697247706	0.00974770642202	0.00507614213198	0.00172018348624	0.0023768366465
FBgn0035423	0.00282007896221	0.00112803158488	0.00630733944954	0.00338409475465	0.00286697247706	0.00974770642202	0.00507614213198	0.00172018348624	0.0023768366465
FBgn0033138	0.0198555956679	0.00180505415162	0.00715071507151	0.00361010830325	0.0	0.00715071507151	0.0228640192539	0.001100110011	0.0023768366465
FBgn0033130	0.0198555956679	0.00180505415162	0.00715071507151	0.00361010830325	0.0	0.00715071507151	0.0228640192539	0.001100110011	0.0023768366465
FBgn0033132	0.0325814536341	0.015873015873	0.00715071507151	0.0392648287385	0.0	0.00715071507151	0.0651629072682	0.001100110011	0.0023768366465
FBgn0033134	0.0325814536341	0.015873015873	0.00715071507151	0.0392648287385	0.0	0.00715071507151	0.0651629072682	0.001100110011	0.0023768366465
FBgn0033135	0.0198555956679	0.00180505415162	0.00715071507151	0.00361010830325	0.0	0.00715071507151	0.0228640192539	0.001100110011	0.0023768366465
FBgn0040507	0.0198555956679	0.00180505415162	0.0401869158879	0.00361010830325	0.0140186915888	0.0691588785047	0.0228640192539	0.0130841121495	0.0023768366465
FBgn0039897	0.0325814536341	0.015873015873	0.00715071507151	0.0392648287385	0.0	0.00715071507151	0.0651629072682	0.001100110011	0.0023768366465
FBgn0035397	0.00282007896221	0.00112803158488	0.00630733944954	0.00338409475465	0.00286697247706	0.00974770642202	0.00507614213198	0.00172018348624	0.0023768366465
FBgn0005778	0.0198555956679	0.00180505415162	0.00715071507151	0.00361010830325	0.0	0.00715071507151	0.0228640192539	0.001100110011	0.0023768366465
FBgn0005771	0.00282007896221	0.00112803158488	0.00630733944954	0.00338409475465	0.00286697247706	0.00974770642202	0.00507614213198	0.00172018348624	0.0023768366465
FBgn0015756	0.00282007896221	0.00112803158488	0.00630733944954	0.00338409475465	0.00286697247706	0.00974770642202	0.00507614213198	0.00172018348624	0.0023768366465
FBgn0040102	0.0325814536341	0.015873015873	0.0401869158879	0.0392648287385	0.0140186915888	0.0691588785047	0.0651629072682	0.0130841121495	0.0023768366465
FBgn0034230	0.00282007896221	0.00112803158488	0.00630733944954	0.00338409475465	0.00286697247706	0.00974770642202	0.00507614213198	0.00172018348624	0.0023768366465
FBgn0034231	0.00282007896221	0.00112803158488	0.00630733944954	0.00338409475465	0.00286697247706	0.00974770642202	0.00507614213198	0.00172018348624	0.0023768366465
FBgn0032899	0.0325814536341	0.015873015873	0.00715071507151	0.0392648287385	0.0	0.00715071507151	0.0651629072682	0.001100110011	0.0023768366465
FBgn0032897	0.0325814536341	0.015873015873	0.0401869158879	0.0392648287385	0.0140186915888	0.0691588785047	0.0651629072682	0.0130841121495	0.0023768366465
FBgn0051871	0.0325814536341	0.015873015873	0.00715071507151	0.0392648287385	0.0	0.00715071507151	0.0651629072682	0.001100110011	0.0023768366465
FBgn0025394	0.00282007896221	0.00112803158488	0.00630733944954	0.00338409475465	0.00286697247706	0.00974770642202	0.00507614213198	0.00172018348624	0.0023768366465
FBgn0025643	0.0325814536341	0.015873015873	0.00715071507151	0.0392648287385	0.0	0.00715071507151	0.0651629072682	0.001100110011	0.0023768366465
FBgn0011648	0.00282007896221	0.00112803158488	0.00630733944954	0.00338409475465	0.00286697247706	0.00974770642202	0.00507614213198	0.00172018348624	0.0023768366465
FBgn0029768	0.0198555956679	0.00180505415162	0.00715071507151	0.00361010830325	0.0	0.00715071507151	0.0228640192539	0.001100110011	0.0023768366465
FBgn0029769	0.0198555956679	0.00180505415162	0.00715071507151	0.00361010830325	0.0	0.00715071507151	0.0228640192539	0.001100110011	0.0023768366465
FBgn0032518	0.00282007896221	0.00112803158488	0.00630733944954	0.00338409475465	0.00286697247706	0.00974770642202	0.00507614213198	0.00172018348624	0.0023768366465
FBgn0029761	0.0198555956679	0.00180505415162	0.00715071507151	0.00361010830325	0.0	0.00715071507151	0.0228640192539	0.001100110011	0.0023768366465
FBgn0029765	0.0198555956679	0.00180505415162	0.00715071507151	0.00361010830325	0.0	0.00715071507151	0.0228640192539	0.001100110011	0.0023768366465
FBgn0039359	0.00282007896221	0.00112803158488	0.0401869158879	0.00338409475465	0.0140186915888	0.0691588785047	0.00507614213198	0.0130841121495	0.0023768366465
FBgn0037934	0.0198555956679	0.00180505415162	0.00715071507151	0.00361010830325	0.0	0.00715071507151	0.0228640192539	0.001100110011	0.0023768366465
FBgn0037930	0.00282007896221	0.00112803158488	0.00630733944954	0.00338409475465	0.00286697247706	0.00974770642202	0.00507614213198	0.00172018348624	0.0023768366465
FBgn0037933	0.00282007896221	0.00112803158488	0.00630733944954	0.00338409475465	0.00286697247706	0.00974770642202	0.00507614213198	0.00172018348624	0.0023768366465
FBgn0037938	0.0198555956679	0.00180505415162	0.00715071507151	0.00361010830325	0.0	0.00715071507151	0.0228640192539	0.001100110011	0.0023768366465
FBgn0037939	0.0198555956679	0.00180505415162	0.00715071507151	0.00361010830325	0.0	0.00715071507151	0.0228640192539	0.001100110011	0.0023768366465
FBgn0000533	0.0325814536341	0.015873015873	0.0401869158879	0.0392648287385	0.0140186915888	0.0691588785047	0.0651629072682	0.0130841121495	0.0023768366465
FBgn0000826	0.0198555956679	0.00180505415162	0.00715071507151	0.00361010830325	0.0	0.00715071507151	0.0228640192539	0.001100110011	0.0023768366465
FBgn0039647	0.0198555956679	0.00180505415162	0.00715071507151	0.00361010830325	0.0	0.00715071507151	0.0228640192539	0.001100110011	0.0023768366465
FBgn0039640	0.0325814536341	0.015873015873	0.0401869158879	0.0392648287385	0.0140186915888	0.0691588785047	0.0651629072682	0.0130841121495	0.0023768366465
FBgn0031091	0.0325814536341	0.015873015873	0.0401869158879	0.0392648287385	0.0140186915888	0.0691588785047	0.0651629072682	0.0130841121495	0.0023768366465
FBgn0031090	0.00282007896221	0.00112803158488	0.00630733944954	0.00338409475465	0.00286697247706	0.00974770642202	0.00507614213198	0.00172018348624	0.0023768366465
FBgn0031093	0.0325814536341	0.015873015873	0.00630733944954	0.0392648287385	0.00286697247706	0.00974770642202	0.0651629072682	0.00172018348624	0.0023768366465
FBgn0031092	0.0325814536341	0.015873015873	0.00630733944954	0.0392648287385	0.00286697247706	0.00974770642202	0.0651629072682	0.00172018348624	0.0023768366465
FBgn0031094	0.0325814536341	0.015873015873	0.0401869158879	0.0392648287385	0.0140186915888	0.0691588785047	0.0651629072682	0.0130841121495	0.0023768366465
FBgn0031097	0.0325814536341	0.015873015873	0.0401869158879	0.0392648287385	0.0140186915888	0.0691588785047	0.0651629072682	0.0130841121495	0.0023768366465
FBgn0031099	0.00282007896221	0.00112803158488	0.00630733944954	0.00338409475465	0.00286697247706	0.00974770642202	0.00507614213198	0.00172018348624	0.0023768366465
FBgn0031098	0.00282007896221	0.00112803158488	0.00630733944954	0.00338409475465	0.00286697247706	0.00974770642202	0.00507614213198	0.00172018348624	0.0023768366465
FBgn0011361	0.00282007896221	0.00112803158488	0.00630733944954	0.00338409475465	0.00286697247706	0.00974770642202	0.00507614213198	0.00172018348624	0.0023768366465
FBgn0029947	0.0198555956679	0.00180505415162	0.00715071507151	0.00361010830325	0.0	0.00715071507151	0.0228640192539	0.001100110011	0.0023768366465
FBgn0029944	0.00282007896221	0.00112803158488	0.00630733944954	0.00338409475465	0.00286697247706	0.00974770642202	0.00507614213198	0.00172018348624	0.0023768366465
FBgn0031896	0.0325814536341	0.015873015873	0.0401869158879	0.0392648287385	0.0140186915888	0.0691588785047	0.0651629072682	0.0130841121495	0.0023768366465
FBgn0015584	0.0198555956679	0.00180505415162	0.00715071507151	0.00361010830325	0.0	0.00715071507151	0.0228640192539	0.001100110011	0.0023768366465
FBgn0027095	0.00282007896221	0.00112803158488	0.00630733944954	0.00338409475465	0.00286697247706	0.00974770642202	0.00507614213198	0.00172018348624	0.0023768366465
FBgn0034602	0.0325814536341	0.015873015873	0.00715071507151	0.0392648287385	0.0	0.00715071507151	0.0651629072682	0.001100110011	0.0023768366465
FBgn0034601	0.0198555956679	0.00180505415162	0.00715071507151	0.00361010830325	0.0	0.00715071507151	0.0228640192539	0.001100110011	0.0023768366465
FBgn0034606	0.0325814536341	0.015873015873	0.0401869158879	0.0392648287385	0.0140186915888	0.0691588785047	0.0651629072682	0.0130841121495	0.0023768366465
FBgn0015288	0.00282007896221	0.00112803158488	0.00630733944954	0.00338409475465	0.00286697247706	0.00974770642202	0.00507614213198	0.00172018348624	0.0023768366465
FBgn0040089	0.0325814536341	0.015873015873	0.0401869158879	0.0392648287385	0.0140186915888	0.0691588785047	0.0651629072682	0.0130841121495	0.0023768366465
FBgn0015286	0.0325814536341	0.015873015873	0.0401869158879	0.0392648287385	0.0140186915888	0.0691588785047	0.0651629072682	0.0130841121495	0.0023768366465
FBgn0015287	0.0325814536341	0.015873015873	0.00630733944954	0.0392648287385	0.00286697247706	0.00974770642202	0.0651629072682	0.00172018348624	0.0023768366465
FBgn0034356	0.0198555956679	0.00180505415162	0.0401869158879	0.00361010830325	0.0140186915888	0.0691588785047	0.0228640192539	0.0130841121495	0.0023768366465
FBgn0015282	0.00282007896221	0.00112803158488	0.00630733944954	0.00338409475465	0.00286697247706	0.00974770642202	0.00507614213198	0.00172018348624	0.0023768366465
FBgn0040080	0.00282007896221	0.00112803158488	0.00630733944954	0.00338409475465	0.00286697247706	0.00974770642202	0.00507614213198	0.00172018348624	0.0023768366465
FBgn0034352	0.0198555956679	0.00180505415162	0.00715071507151	0.00361010830325	0.0	0.00715071507151	0.0228640192539	0.001100110011	0.0023768366465
FBgn0038113	0.0198555956679	0.00180505415162	0.00715071507151	0.00361010830325	0.0	0.00715071507151	0.0228640192539	0.001100110011	0.0023768366465
FBgn0038110	0.00282007896221	0.00112803158488	0.00630733944954	0.00338409475465	0.00286697247706	0.00974770642202	0.00507614213198	0.00172018348624	0.0023768366465
FBgn0038114	0.0198555956679	0.00180505415162	0.00715071507151	0.00361010830325	0.0	0.00715071507151	0.0228640192539	0.001100110011	0.0023768366465
FBgn0038118	0.0325814536341	0.015873015873	0.0401869158879	0.0392648287385	0.0140186915888	0.0691588785047	0.0651629072682	0.0130841121495	0.0023768366465
FBgn0030276	0.00282007896221	0.00112803158488	0.00630733944954	0.00338409475465	0.00286697247706	0.00974770642202	0.00507614213198	0.00172018348624	0.0023768366465
FBgn0030277	0.0198555956679	0.00180505415162	0.00715071507151	0.00361010830325	0.0	0.00715071507151	0.0228640192539	0.001100110011	0.0023768366465
FBgn0030274	0.00282007896221	0.00112803158488	0.00630733944954	0.00338409475465	0.00286697247706	0.00974770642202	0.00507614213198	0.00172018348624	0.0023768366465
FBgn0030275	0.0325814536341	0.015873015873	0.0401869158879	0.0392648287385	0.0140186915888	0.0691588785047	0.0651629072682	0.0130841121495	0.0023768366465
FBgn0037550	0.00282007896221	0.00112803158488	0.00630733944954	0.00338409475465	0.00286697247706	0.00974770642202	0.00507614213198	0.00172018348624	0.0023768366465
FBgn0037551	0.00282007896221	0.00112803158488	0.00630733944954	0.00338409475465	0.00286697247706	0.00974770642202	0.00507614213198	0.00172018348624	0.0023768366465
FBgn0050359	0.0198555956679	0.00180505415162	0.00715071507151	0.00361010830325	0.0	0.00715071507151	0.0228640192539	0.001100110011	0.0023768366465
FBgn0036606	0.0198555956679	0.00180505415162	0.00715071507151	0.00361010830325	0.0	0.00715071507151	0.0228640192539	0.001100110011	0.0023768366465
FBgn0036600	0.0198555956679	0.00180505415162	0.00715071507151	0.00361010830325	0.0	0.00715071507151	0.0228640192539	0.001100110011	0.0023768366465
FBgn0036603	0.0198555956679	0.00180505415162	0.00715071507151	0.00361010830325	0.0	0.00715071507151	0.0228640192539	0.001100110011	0.0023768366465
FBgn0040260	0.0198555956679	0.00180505415162	0.00715071507151	0.00361010830325	0.0	0.00715071507151	0.0228640192539	0.001100110011	0.0023768366465
FBgn0010014	0.0325814536341	0.015873015873	0.0401869158879	0.0392648287385	0.0140186915888	0.0691588785047	0.0651629072682	0.0130841121495	0.0023768366465
FBgn0010015	0.0198555956679	0.00180505415162	0.00715071507151	0.00361010830325	0.0	0.00715071507151	0.0228640192539	0.001100110011	0.0023768366465
FBgn0010019	0.0198555956679	0.00180505415162	0.00715071507151	0.00361010830325	0.0	0.00715071507151	0.0228640192539	0.001100110011	0.0023768366465
FBgn0010548	0.0325814536341	0.015873015873	0.0401869158879	0.0392648287385	0.0140186915888	0.0691588785047	0.0651629072682	0.0130841121495	0.0023768366465
FBgn0023179	0.0198555956679	0.00180505415162	0.00715071507151	0.00361010830325	0.0	0.00715071507151	0.0228640192539	0.001100110011	0.0023768366465
FBgn0026418	0.00282007896221	0.00112803158488	0.00630733944954	0.00338409475465	0.00286697247706	0.00974770642202	0.00507614213198	0.00172018348624	0.0023768366465
FBgn0023175	0.00282007896221	0.00112803158488	0.00630733944954	0.00338409475465	0.00286697247706	0.00974770642202	0.00507614213198	0.00172018348624	0.0023768366465
FBgn0023174	0.00282007896221	0.00112803158488	0.00630733944954	0.00338409475465	0.00286697247706	0.00974770642202	0.00507614213198	0.00172018348624	0.0023768366465
FBgn0026417	0.00282007896221	0.00112803158488	0.00630733944954	0.00338409475465	0.00286697247706	0.00974770642202	0.00507614213198	0.00172018348624	0.0023768366465
FBgn0023170	0.00282007896221	0.00112803158488	0.00630733944954	0.00338409475465	0.00286697247706	0.00974770642202	0.00507614213198	0.00172018348624	0.0023768366465
FBgn0051221	0.0198555956679	0.00180505415162	0.00715071507151	0.00361010830325	0.0	0.00715071507151	0.0228640192539	0.001100110011	0.0023768366465
FBgn0021825	0.00282007896221	0.00112803158488	0.00630733944954	0.00338409475465	0.00286697247706	0.00974770642202	0.00507614213198	0.00172018348624	0.0023768366465
FBgn0037181	0.0198555956679	0.00180505415162	0.00715071507151	0.00361010830325	0.0	0.00715071507151	0.0228640192539	0.001100110011	0.0023768366465
FBgn0037180	0.0198555956679	0.00180505415162	0.00715071507151	0.00361010830325	0.0	0.00715071507151	0.0228640192539	0.001100110011	0.0023768366465
FBgn0051431	0.0325814536341	0.015873015873	0.0401869158879	0.0392648287385	0.0140186915888	0.0691588785047	0.0651629072682	0.0130841121495	0.0023768366465
FBgn0030852	0.0325814536341	0.015873015873	0.0401869158879	0.0392648287385	0.0140186915888	0.0691588785047	0.0651629072682	0.0130841121495	0.0023768366465
FBgn0030850	0.00282007896221	0.00112803158488	0.0401869158879	0.00338409475465	0.0140186915888	0.0691588785047	0.00507614213198	0.0130841121495	0.0023768366465
FBgn0030851	0.00282007896221	0.00112803158488	0.00630733944954	0.00338409475465	0.00286697247706	0.00974770642202	0.00507614213198	0.00172018348624	0.0023768366465
FBgn0030859	0.0198555956679	0.00180505415162	0.00715071507151	0.00361010830325	0.0	0.00715071507151	0.0228640192539	0.001100110011	0.0023768366465
FBgn0032726	0.0198555956679	0.00180505415162	0.00715071507151	0.00361010830325	0.0	0.00715071507151	0.0228640192539	0.001100110011	0.0023768366465
FBgn0032727	0.0325814536341	0.015873015873	0.0401869158879	0.0392648287385	0.0140186915888	0.0691588785047	0.0651629072682	0.0130841121495	0.0023768366465
FBgn0023545	0.00282007896221	0.00112803158488	0.00630733944954	0.00338409475465	0.00286697247706	0.00974770642202	0.00507614213198	0.00172018348624	0.0023768366465
FBgn0001205	0.00282007896221	0.00112803158488	0.00630733944954	0.00338409475465	0.00286697247706	0.00974770642202	0.00507614213198	0.00172018348624	0.0023768366465
FBgn0001204	0.0198555956679	0.00180505415162	0.0401869158879	0.00361010830325	0.0140186915888	0.0691588785047	0.0228640192539	0.0130841121495	0.0023768366465
FBgn0001203	0.0198555956679	0.00180505415162	0.00715071507151	0.00361010830325	0.0	0.00715071507151	0.0228640192539	0.001100110011	0.0023768366465
FBgn0001202	0.00282007896221	0.00112803158488	0.00630733944954	0.00338409475465	0.00286697247706	0.00974770642202	0.00507614213198	0.00172018348624	0.0023768366465
FBgn0053156	0.00282007896221	0.00112803158488	0.0401869158879	0.00338409475465	0.0140186915888	0.0691588785047	0.00507614213198	0.0130841121495	0.0023768366465
FBgn0052412	0.0198555956679	0.00180505415162	0.00715071507151	0.00361010830325	0.0	0.00715071507151	0.0228640192539	0.001100110011	0.0023768366465
FBgn0001208	0.0325814536341	0.015873015873	0.00715071507151	0.0392648287385	0.0	0.00715071507151	0.0651629072682	0.001100110011	0.0023768366465
FBgn0042138	0.00282007896221	0.00112803158488	0.00630733944954	0.00338409475465	0.00286697247706	0.00974770642202	0.00507614213198	0.00172018348624	0.0023768366465
FBgn0035989	0.00282007896221	0.00112803158488	0.00630733944954	0.00338409475465	0.00286697247706	0.00974770642202	0.00507614213198	0.00172018348624	0.0023768366465
FBgn0035983	0.00282007896221	0.00112803158488	0.00630733944954	0.00338409475465	0.00286697247706	0.00974770642202	0.00507614213198	0.00172018348624	0.0023768366465
FBgn0024250	0.0325814536341	0.015873015873	0.0401869158879	0.0392648287385	0.0140186915888	0.0691588785047	0.0651629072682	0.0130841121495	0.0023768366465
FBgn0024252	0.00282007896221	0.00112803158488	0.00630733944954	0.00338409475465	0.00286697247706	0.00974770642202	0.00507614213198	0.00172018348624	0.0023768366465
FBgn0020018	0.0325814536341	0.015873015873	0.0401869158879	0.0392648287385	0.0140186915888	0.0691588785047	0.0651629072682	0.0130841121495	0.0023768366465
FBgn0028374	0.0198555956679	0.00180505415162	0.00715071507151	0.00361010830325	0.0	0.00715071507151	0.0228640192539	0.001100110011	0.0023768366465
FBgn0028373	0.00282007896221	0.00112803158488	0.00630733944954	0.00338409475465	0.00286697247706	0.00974770642202	0.00507614213198	0.00172018348624	0.0023768366465
FBgn0028371	0.0325814536341	0.015873015873	0.0401869158879	0.0392648287385	0.0140186915888	0.0691588785047	0.0651629072682	0.0130841121495	0.0023768366465
FBgn0028379	0.0198555956679	0.00180505415162	0.00715071507151	0.00361010830325	0.0	0.00715071507151	0.0228640192539	0.001100110011	0.0023768366465
FBgn0029531	0.0325814536341	0.015873015873	0.00715071507151	0.0392648287385	0.0	0.00715071507151	0.0651629072682	0.001100110011	0.0023768366465
FBgn0022702	0.0325814536341	0.015873015873	0.0401869158879	0.0392648287385	0.0140186915888	0.0691588785047	0.0651629072682	0.0130841121495	0.0023768366465
FBgn0032549	0.0198555956679	0.00180505415162	0.00715071507151	0.00361010830325	0.0	0.00715071507151	0.0228640192539	0.001100110011	0.0023768366465
FBgn0022709	0.0198555956679	0.00180505415162	0.00715071507151	0.00361010830325	0.0	0.00715071507151	0.0228640192539	0.001100110011	0.0023768366465
FBgn0029539	0.0198555956679	0.00180505415162	0.00715071507151	0.00361010830325	0.0	0.00715071507151	0.0228640192539	0.001100110011	0.0023768366465
FBgn0035187	0.0198555956679	0.00180505415162	0.0401869158879	0.00361010830325	0.0140186915888	0.0691588785047	0.0228640192539	0.0130841121495	0.0023768366465
FBgn0035186	0.0325814536341	0.015873015873	0.0401869158879	0.0392648287385	0.0140186915888	0.0691588785047	0.0651629072682	0.0130841121495	0.0023768366465
FBgn0032231	0.00282007896221	0.00112803158488	0.00630733944954	0.00338409475465	0.00286697247706	0.00974770642202	0.00507614213198	0.00172018348624	0.0023768366465
FBgn0035189	0.0325814536341	0.015873015873	0.0401869158879	0.0392648287385	0.0140186915888	0.0691588785047	0.0651629072682	0.0130841121495	0.0023768366465
FBgn0052687	0.0198555956679	0.00180505415162	0.00715071507151	0.00361010830325	0.0	0.00715071507151	0.0228640192539	0.001100110011	0.0023768366465
FBgn0036102	0.0198555956679	0.00180505415162	0.00715071507151	0.00361010830325	0.0	0.00715071507151	0.0228640192539	0.001100110011	0.0023768366465
FBgn0031250	0.00282007896221	0.00112803158488	0.00630733944954	0.00338409475465	0.00286697247706	0.00974770642202	0.00507614213198	0.00172018348624	0.0023768366465
FBgn0033423	0.0198555956679	0.00180505415162	0.00715071507151	0.00361010830325	0.0	0.00715071507151	0.0228640192539	0.001100110011	0.0023768366465
FBgn0033427	0.00282007896221	0.00112803158488	0.00630733944954	0.00338409475465	0.00286697247706	0.00974770642202	0.00507614213198	0.00172018348624	0.0023768366465
FBgn0036988	0.00282007896221	0.00112803158488	0.00630733944954	0.00338409475465	0.00286697247706	0.00974770642202	0.00507614213198	0.00172018348624	0.0023768366465
FBgn0036104	0.00282007896221	0.00112803158488	0.00630733944954	0.00338409475465	0.00286697247706	0.00974770642202	0.00507614213198	0.00172018348624	0.0023768366465
FBgn0052350	0.00282007896221	0.00112803158488	0.0401869158879	0.00338409475465	0.0140186915888	0.0691588785047	0.00507614213198	0.0130841121495	0.0023768366465
FBgn0036980	0.00282007896221	0.00112803158488	0.00630733944954	0.00338409475465	0.00286697247706	0.00974770642202	0.00507614213198	0.00172018348624	0.0023768366465
FBgn0036986	0.0325814536341	0.015873015873	0.0401869158879	0.0392648287385	0.0140186915888	0.0691588785047	0.0651629072682	0.0130841121495	0.0023768366465
FBgn0036987	0.00282007896221	0.00112803158488	0.00630733944954	0.00338409475465	0.00286697247706	0.00974770642202	0.00507614213198	0.00172018348624	0.0023768366465
FBgn0036984	0.0325814536341	0.015873015873	0.00715071507151	0.0392648287385	0.0	0.00715071507151	0.0651629072682	0.001100110011	0.0023768366465
FBgn0028952	0.0325814536341	0.015873015873	0.00630733944954	0.0392648287385	0.00286697247706	0.00974770642202	0.0651629072682	0.00172018348624	0.0023768366465
FBgn0028953	0.00282007896221	0.00112803158488	0.00630733944954	0.00338409475465	0.00286697247706	0.00974770642202	0.00507614213198	0.00172018348624	0.0023768366465
FBgn0019940	0.0198555956679	0.00180505415162	0.00715071507151	0.00361010830325	0.0	0.00715071507151	0.0228640192539	0.001100110011	0.0023768366465
FBgn0019949	0.00282007896221	0.00112803158488	0.00630733944954	0.00338409475465	0.00286697247706	0.00974770642202	0.00507614213198	0.00172018348624	0.0023768366465
FBgn0019948	0.00282007896221	0.00112803158488	0.00630733944954	0.00338409475465	0.00286697247706	0.00974770642202	0.00507614213198	0.00172018348624	0.0023768366465
FBgn0030073	0.0325814536341	0.015873015873	0.0401869158879	0.0392648287385	0.0140186915888	0.0691588785047	0.0651629072682	0.0130841121495	0.0023768366465
FBgn0000492	0.0325814536341	0.015873015873	0.0401869158879	0.0392648287385	0.0140186915888	0.0691588785047	0.0651629072682	0.0130841121495	0.0023768366465
FBgn0034162	0.0325814536341	0.015873015873	0.0401869158879	0.0392648287385	0.0140186915888	0.0691588785047	0.0651629072682	0.0130841121495	0.0023768366465
FBgn0031406	0.0198555956679	0.00180505415162	0.00715071507151	0.00361010830325	0.0	0.00715071507151	0.0228640192539	0.001100110011	0.0023768366465
FBgn0031407	0.0198555956679	0.00180505415162	0.00715071507151	0.00361010830325	0.0	0.00715071507151	0.0228640192539	0.001100110011	0.0023768366465
FBgn0039189	0.0325814536341	0.015873015873	0.00630733944954	0.0392648287385	0.00286697247706	0.00974770642202	0.0651629072682	0.00172018348624	0.0023768366465
FBgn0031405	0.0198555956679	0.00180505415162	0.00715071507151	0.00361010830325	0.0	0.00715071507151	0.0228640192539	0.001100110011	0.0023768366465
FBgn0031070	0.0325814536341	0.015873015873	0.00630733944954	0.0392648287385	0.00286697247706	0.00974770642202	0.0651629072682	0.00172018348624	0.0023768366465
FBgn0037128	0.0198555956679	0.00180505415162	0.00715071507151	0.00361010830325	0.0	0.00715071507151	0.0228640192539	0.001100110011	0.0023768366465
FBgn0037126	0.0198555956679	0.00180505415162	0.00715071507151	0.00361010830325	0.0	0.00715071507151	0.0228640192539	0.001100110011	0.0023768366465
FBgn0037124	0.0198555956679	0.00180505415162	0.00715071507151	0.00361010830325	0.0	0.00715071507151	0.0228640192539	0.001100110011	0.0023768366465
FBgn0037123	0.0198555956679	0.00180505415162	0.00715071507151	0.00361010830325	0.0	0.00715071507151	0.0228640192539	0.001100110011	0.0023768366465
FBgn0037122	0.0198555956679	0.00180505415162	0.0401869158879	0.00361010830325	0.0140186915888	0.0691588785047	0.0228640192539	0.0130841121495	0.0023768366465
FBgn0037121	0.00282007896221	0.00112803158488	0.00630733944954	0.00338409475465	0.00286697247706	0.00974770642202	0.00507614213198	0.00172018348624	0.0023768366465
FBgn0025820	0.00282007896221	0.00112803158488	0.00630733944954	0.00338409475465	0.00286697247706	0.00974770642202	0.00507614213198	0.00172018348624	0.0023768366465
FBgn0025825	0.00282007896221	0.00112803158488	0.00630733944954	0.00338409475465	0.00286697247706	0.00974770642202	0.00507614213198	0.00172018348624	0.0023768366465
FBgn0025827	0.0198555956679	0.00180505415162	0.00715071507151	0.00361010830325	0.0	0.00715071507151	0.0228640192539	0.001100110011	0.0023768366465
FBgn0039459	0.00282007896221	0.00112803158488	0.00630733944954	0.00338409475465	0.00286697247706	0.00974770642202	0.00507614213198	0.00172018348624	0.0023768366465
FBgn0039451	0.00282007896221	0.00112803158488	0.00630733944954	0.00338409475465	0.00286697247706	0.00974770642202	0.00507614213198	0.00172018348624	0.0023768366465
FBgn0033802	0.0198555956679	0.00180505415162	0.0401869158879	0.00361010830325	0.0140186915888	0.0691588785047	0.0228640192539	0.0130841121495	0.0023768366465
FBgn0034299	0.0325814536341	0.015873015873	0.00630733944954	0.0392648287385	0.00286697247706	0.00974770642202	0.0651629072682	0.00172018348624	0.0023768366465
FBgn0034294	0.0198555956679	0.00180505415162	0.00715071507151	0.00361010830325	0.0	0.00715071507151	0.0228640192539	0.001100110011	0.0023768366465
FBgn0034295	0.0198555956679	0.00180505415162	0.00715071507151	0.00361010830325	0.0	0.00715071507151	0.0228640192539	0.001100110011	0.0023768366465
FBgn0031664	0.00282007896221	0.00112803158488	0.00630733944954	0.00338409475465	0.00286697247706	0.00974770642202	0.00507614213198	0.00172018348624	0.0023768366465
FBgn0031662	0.00282007896221	0.00112803158488	0.00630733944954	0.00338409475465	0.00286697247706	0.00974770642202	0.00507614213198	0.00172018348624	0.0023768366465
FBgn0031663	0.0325814536341	0.015873015873	0.0401869158879	0.0392648287385	0.0140186915888	0.0691588785047	0.0651629072682	0.0130841121495	0.0023768366465
FBgn0014010	0.00282007896221	0.00112803158488	0.00630733944954	0.00338409475465	0.00286697247706	0.00974770642202	0.00507614213198	0.00172018348624	0.0023768366465
FBgn0014011	0.0325814536341	0.015873015873	0.0401869158879	0.0392648287385	0.0140186915888	0.0691588785047	0.0651629072682	0.0130841121495	0.0023768366465
FBgn0004242	0.0198555956679	0.00180505415162	0.00715071507151	0.00361010830325	0.0	0.00715071507151	0.0228640192539	0.001100110011	0.0023768366465
FBgn0050115	0.0325814536341	0.015873015873	0.0401869158879	0.0392648287385	0.0140186915888	0.0691588785047	0.0651629072682	0.0130841121495	0.0023768366465
FBgn0036299	0.00282007896221	0.00112803158488	0.00630733944954	0.00338409475465	0.00286697247706	0.00974770642202	0.00507614213198	0.00172018348624	0.0023768366465
FBgn0036294	0.0325814536341	0.015873015873	0.0401869158879	0.0392648287385	0.0140186915888	0.0691588785047	0.0651629072682	0.0130841121495	0.0023768366465
FBgn0036292	0.00282007896221	0.00112803158488	0.00630733944954	0.00338409475465	0.00286697247706	0.00974770642202	0.00507614213198	0.00172018348624	0.0023768366465
FBgn0034838	0.0198555956679	0.00180505415162	0.00715071507151	0.00361010830325	0.0	0.00715071507151	0.0228640192539	0.001100110011	0.0023768366465
FBgn0002773	0.0325814536341	0.015873015873	0.00715071507151	0.0392648287385	0.0	0.00715071507151	0.0651629072682	0.001100110011	0.0023768366465
FBgn0034833	0.0198555956679	0.00180505415162	0.00715071507151	0.00361010830325	0.0	0.00715071507151	0.0228640192539	0.001100110011	0.0023768366465
FBgn0040696	0.0198555956679	0.00180505415162	0.00715071507151	0.00361010830325	0.0	0.00715071507151	0.0228640192539	0.001100110011	0.0023768366465
FBgn0030474	0.00282007896221	0.00112803158488	0.00630733944954	0.00338409475465	0.00286697247706	0.00974770642202	0.00507614213198	0.00172018348624	0.0023768366465
FBgn0038321	0.0325814536341	0.015873015873	0.0401869158879	0.0392648287385	0.0140186915888	0.0691588785047	0.0651629072682	0.0130841121495	0.0023768366465
FBgn0038323	0.00282007896221	0.00112803158488	0.00630733944954	0.00338409475465	0.00286697247706	0.00974770642202	0.00507614213198	0.00172018348624	0.0023768366465
FBgn0038324	0.00282007896221	0.00112803158488	0.00630733944954	0.00338409475465	0.00286697247706	0.00974770642202	0.00507614213198	0.00172018348624	0.0023768366465
FBgn0038325	0.00282007896221	0.00112803158488	0.00630733944954	0.00338409475465	0.00286697247706	0.00974770642202	0.00507614213198	0.00172018348624	0.0023768366465
FBgn0038327	0.00282007896221	0.00112803158488	0.00630733944954	0.00338409475465	0.00286697247706	0.00974770642202	0.00507614213198	0.00172018348624	0.0023768366465
FBgn0035400	0.00282007896221	0.00112803158488	0.00630733944954	0.00338409475465	0.00286697247706	0.00974770642202	0.00507614213198	0.00172018348624	0.0023768366465
FBgn0035401	0.00282007896221	0.00112803158488	0.00630733944954	0.00338409475465	0.00286697247706	0.00974770642202	0.00507614213198	0.00172018348624	0.0023768366465
FBgn0002775	0.00282007896221	0.00112803158488	0.00630733944954	0.00338409475465	0.00286697247706	0.00974770642202	0.00507614213198	0.00172018348624	0.0023768366465
FBgn0035409	0.0198555956679	0.00180505415162	0.00715071507151	0.00361010830325	0.0	0.00715071507151	0.0228640192539	0.001100110011	0.0023768366465
FBgn0036476	0.00282007896221	0.00112803158488	0.00630733944954	0.00338409475465	0.00286697247706	0.00974770642202	0.00507614213198	0.00172018348624	0.0023768366465
FBgn0033117	0.00282007896221	0.00112803158488	0.00630733944954	0.00338409475465	0.00286697247706	0.00974770642202	0.00507614213198	0.00172018348624	0.0023768366465
FBgn0033115	0.0325814536341	0.015873015873	0.00715071507151	0.0392648287385	0.0	0.00715071507151	0.0651629072682	0.001100110011	0.0023768366465
FBgn0036478	0.00282007896221	0.00112803158488	0.00630733944954	0.00338409475465	0.00286697247706	0.00974770642202	0.00507614213198	0.00172018348624	0.0023768366465
FBgn0013548	0.00282007896221	0.00112803158488	0.00630733944954	0.00338409475465	0.00286697247706	0.00974770642202	0.00507614213198	0.00172018348624	0.0023768366465
FBgn0002778	0.0325814536341	0.015873015873	0.0401869158879	0.0392648287385	0.0140186915888	0.0691588785047	0.0651629072682	0.0130841121495	0.0023768366465
FBgn0040524	0.0325814536341	0.015873015873	0.0401869158879	0.0392648287385	0.0140186915888	0.0691588785047	0.0651629072682	0.0130841121495	0.0023768366465
FBgn0005590	0.0198555956679	0.00180505415162	0.00715071507151	0.00361010830325	0.0	0.00715071507151	0.0228640192539	0.001100110011	0.0023768366465
FBgn0004009	0.0325814536341	0.015873015873	0.0401869158879	0.0392648287385	0.0140186915888	0.0691588785047	0.0651629072682	0.0130841121495	0.0023768366465
FBgn0001075	0.0198555956679	0.00180505415162	0.0401869158879	0.00361010830325	0.0140186915888	0.0691588785047	0.0228640192539	0.0130841121495	0.0023768366465
FBgn0004556	0.0325814536341	0.015873015873	0.0401869158879	0.0392648287385	0.0140186915888	0.0691588785047	0.0651629072682	0.0130841121495	0.0023768366465
FBgn0030964	0.0325814536341	0.015873015873	0.0401869158879	0.0392648287385	0.0140186915888	0.0691588785047	0.0651629072682	0.0130841121495	0.0023768366465
FBgn0002522	0.0325814536341	0.015873015873	0.0401869158879	0.0392648287385	0.0140186915888	0.0691588785047	0.0651629072682	0.0130841121495	0.0023768366465
FBgn0002521	0.0325814536341	0.015873015873	0.0401869158879	0.0392648287385	0.0140186915888	0.0691588785047	0.0651629072682	0.0130841121495	0.0023768366465
FBgn0002526	0.00282007896221	0.00112803158488	0.00630733944954	0.00338409475465	0.00286697247706	0.00974770642202	0.00507614213198	0.00172018348624	0.0023768366465
FBgn0002525	0.00282007896221	0.00112803158488	0.00630733944954	0.00338409475465	0.00286697247706	0.00974770642202	0.00507614213198	0.00172018348624	0.0023768366465
FBgn0002524	0.00282007896221	0.00112803158488	0.00630733944954	0.00338409475465	0.00286697247706	0.00974770642202	0.00507614213198	0.00172018348624	0.0023768366465
FBgn0013764	0.00282007896221	0.00112803158488	0.00630733944954	0.00338409475465	0.00286697247706	0.00974770642202	0.00507614213198	0.00172018348624	0.0023768366465
FBgn0025628	0.00282007896221	0.00112803158488	0.00630733944954	0.00338409475465	0.00286697247706	0.00974770642202	0.00507614213198	0.00172018348624	0.0023768366465
FBgn0025627	0.0325814536341	0.015873015873	0.0401869158879	0.0392648287385	0.0140186915888	0.0691588785047	0.0651629072682	0.0130841121495	0.0023768366465
FBgn0025626	0.00282007896221	0.00112803158488	0.00630733944954	0.00338409475465	0.00286697247706	0.00974770642202	0.00507614213198	0.00172018348624	0.0023768366465
FBgn0025625	0.0325814536341	0.015873015873	0.0401869158879	0.0392648287385	0.0140186915888	0.0691588785047	0.0651629072682	0.0130841121495	0.0023768366465
FBgn0025621	0.00282007896221	0.00112803158488	0.00630733944954	0.00338409475465	0.00286697247706	0.00974770642202	0.00507614213198	0.00172018348624	0.0023768366465
FBgn0025620	0.0198555956679	0.00180505415162	0.00715071507151	0.00361010830325	0.0	0.00715071507151	0.0228640192539	0.001100110011	0.0023768366465
FBgn0051321	0.0325814536341	0.015873015873	0.0401869158879	0.0392648287385	0.0140186915888	0.0691588785047	0.0651629072682	0.0130841121495	0.0023768366465
FBgn0039210	0.00282007896221	0.00112803158488	0.00630733944954	0.00338409475465	0.00286697247706	0.00974770642202	0.00507614213198	0.00172018348624	0.0023768366465
FBgn0029704	0.0325814536341	0.015873015873	0.0401869158879	0.0392648287385	0.0140186915888	0.0691588785047	0.0651629072682	0.0130841121495	0.0023768366465
FBgn0029705	0.0198555956679	0.00180505415162	0.00715071507151	0.00361010830325	0.0	0.00715071507151	0.0228640192539	0.001100110011	0.0023768366465
FBgn0029702	0.0198555956679	0.00180505415162	0.00715071507151	0.00361010830325	0.0	0.00715071507151	0.0228640192539	0.001100110011	0.0023768366465
FBgn0029703	0.0198555956679	0.00180505415162	0.00715071507151	0.00361010830325	0.0	0.00715071507151	0.0228640192539	0.001100110011	0.0023768366465
FBgn0030960	0.0198555956679	0.00180505415162	0.0401869158879	0.00361010830325	0.0140186915888	0.0691588785047	0.0228640192539	0.0130841121495	0.0023768366465
FBgn0034599	0.00282007896221	0.00112803158488	0.00630733944954	0.00338409475465	0.00286697247706	0.00974770642202	0.00507614213198	0.00172018348624	0.0023768366465
FBgn0008649	0.0325814536341	0.015873015873	0.0401869158879	0.0392648287385	0.0140186915888	0.0691588785047	0.0651629072682	0.0130841121495	0.0023768366465
FBgn0037918	0.00282007896221	0.00112803158488	0.00630733944954	0.00338409475465	0.00286697247706	0.00974770642202	0.00507614213198	0.00172018348624	0.0023768366465
FBgn0037917	0.00282007896221	0.00112803158488	0.0401869158879	0.00338409475465	0.0140186915888	0.0691588785047	0.00507614213198	0.0130841121495	0.0023768366465
FBgn0030040	0.0325814536341	0.015873015873	0.0401869158879	0.0392648287385	0.0140186915888	0.0691588785047	0.0651629072682	0.0130841121495	0.0023768366465
FBgn0027654	0.0325814536341	0.015873015873	0.00715071507151	0.0392648287385	0.0	0.00715071507151	0.0651629072682	0.001100110011	0.0023768366465
FBgn0039666	0.0325814536341	0.015873015873	0.0401869158879	0.0392648287385	0.0140186915888	0.0691588785047	0.0651629072682	0.0130841121495	0.0023768366465
FBgn0003345	0.0325814536341	0.015873015873	0.00630733944954	0.0392648287385	0.00286697247706	0.00974770642202	0.0651629072682	0.00172018348624	0.0023768366465
FBgn0003346	0.0198555956679	0.00180505415162	0.00715071507151	0.00361010830325	0.0	0.00715071507151	0.0228640192539	0.001100110011	0.0023768366465
FBgn0039665	0.00282007896221	0.00112803158488	0.0401869158879	0.00338409475465	0.0140186915888	0.0691588785047	0.00507614213198	0.0130841121495	0.0023768366465
FBgn0039663	0.00282007896221	0.00112803158488	0.00630733944954	0.00338409475465	0.00286697247706	0.00974770642202	0.00507614213198	0.00172018348624	0.0023768366465
FBgn0024939	0.00282007896221	0.00112803158488	0.00630733944954	0.00338409475465	0.00286697247706	0.00974770642202	0.00507614213198	0.00172018348624	0.0023768366465
FBgn0026255	0.0198555956679	0.00180505415162	0.00715071507151	0.00361010830325	0.0	0.00715071507151	0.0228640192539	0.001100110011	0.0023768366465
FBgn0020224	0.00282007896221	0.00112803158488	0.00630733944954	0.00338409475465	0.00286697247706	0.00974770642202	0.00507614213198	0.00172018348624	0.0023768366465
FBgn0030257	0.0198555956679	0.00180505415162	0.00715071507151	0.00361010830325	0.0	0.00715071507151	0.0228640192539	0.001100110011	0.0023768366465
FBgn0031872	0.00282007896221	0.00112803158488	0.00630733944954	0.00338409475465	0.00286697247706	0.00974770642202	0.00507614213198	0.00172018348624	0.0023768366465
FBgn0031871	0.00282007896221	0.00112803158488	0.00630733944954	0.00338409475465	0.00286697247706	0.00974770642202	0.00507614213198	0.00172018348624	0.0023768366465
FBgn0031876	0.00282007896221	0.00112803158488	0.00630733944954	0.00338409475465	0.00286697247706	0.00974770642202	0.00507614213198	0.00172018348624	0.0023768366465
FBgn0031878	0.00282007896221	0.00112803158488	0.00630733944954	0.00338409475465	0.00286697247706	0.00974770642202	0.00507614213198	0.00172018348624	0.0023768366465
FBgn0010409	0.00282007896221	0.00112803158488	0.00630733944954	0.00338409475465	0.00286697247706	0.00974770642202	0.00507614213198	0.00172018348624	0.0023768366465
FBgn0028918	0.0198555956679	0.00180505415162	0.00715071507151	0.00361010830325	0.0	0.00715071507151	0.0228640192539	0.001100110011	0.0023768366465
FBgn0028919	0.00282007896221	0.00112803158488	0.00630733944954	0.00338409475465	0.00286697247706	0.00974770642202	0.00507614213198	0.00172018348624	0.0023768366465
FBgn0040060	0.0198555956679	0.00180505415162	0.00715071507151	0.00361010830325	0.0	0.00715071507151	0.0228640192539	0.001100110011	0.0023768366465
FBgn0040064	0.0325814536341	0.015873015873	0.0401869158879	0.0392648287385	0.0140186915888	0.0691588785047	0.0651629072682	0.0130841121495	0.0023768366465
FBgn0034629	0.0198555956679	0.00180505415162	0.00715071507151	0.00361010830325	0.0	0.00715071507151	0.0228640192539	0.001100110011	0.0023768366465
FBgn0038134	0.0198555956679	0.00180505415162	0.00715071507151	0.00361010830325	0.0	0.00715071507151	0.0228640192539	0.001100110011	0.0023768366465
FBgn0038130	0.0198555956679	0.00180505415162	0.00715071507151	0.00361010830325	0.0	0.00715071507151	0.0228640192539	0.001100110011	0.0023768366465
FBgn0038132	0.0198555956679	0.00180505415162	0.00715071507151	0.00361010830325	0.0	0.00715071507151	0.0228640192539	0.001100110011	0.0023768366465
FBgn0030968	0.0198555956679	0.00180505415162	0.0401869158879	0.00361010830325	0.0140186915888	0.0691588785047	0.0228640192539	0.0130841121495	0.0023768366465
FBgn0028913	0.0198555956679	0.00180505415162	0.00715071507151	0.00361010830325	0.0	0.00715071507151	0.0228640192539	0.001100110011	0.0023768366465
FBgn0030969	0.00282007896221	0.00112803158488	0.00630733944954	0.00338409475465	0.00286697247706	0.00974770642202	0.00507614213198	0.00172018348624	0.0023768366465
FBgn0051632	0.0325814536341	0.015873015873	0.0401869158879	0.0392648287385	0.0140186915888	0.0691588785047	0.0651629072682	0.0130841121495	0.0023768366465
FBgn0015001	0.0198555956679	0.00180505415162	0.00715071507151	0.00361010830325	0.0	0.00715071507151	0.0228640192539	0.001100110011	0.0023768366465
FBgn0051635	0.00282007896221	0.00112803158488	0.00630733944954	0.00338409475465	0.00286697247706	0.00974770642202	0.00507614213198	0.00172018348624	0.0023768366465
FBgn0051634	0.0198555956679	0.00180505415162	0.00715071507151	0.00361010830325	0.0	0.00715071507151	0.0228640192539	0.001100110011	0.0023768366465
FBgn0035014	0.0198555956679	0.00180505415162	0.00715071507151	0.00361010830325	0.0	0.00715071507151	0.0228640192539	0.001100110011	0.0023768366465
FBgn0035016	0.00282007896221	0.00112803158488	0.00630733944954	0.00338409475465	0.00286697247706	0.00974770642202	0.00507614213198	0.00172018348624	0.0023768366465
FBgn0021847	0.00282007896221	0.00112803158488	0.00630733944954	0.00338409475465	0.00286697247706	0.00974770642202	0.00507614213198	0.00172018348624	0.0023768366465
FBgn0051457	0.00282007896221	0.00112803158488	0.00630733944954	0.00338409475465	0.00286697247706	0.00974770642202	0.00507614213198	0.00172018348624	0.0023768366465
FBgn0051453	0.00282007896221	0.00112803158488	0.00630733944954	0.00338409475465	0.00286697247706	0.00974770642202	0.00507614213198	0.00172018348624	0.0023768366465
FBgn0035469	0.00282007896221	0.00112803158488	0.00630733944954	0.00338409475465	0.00286697247706	0.00974770642202	0.00507614213198	0.00172018348624	0.0023768366465
FBgn0051989	0.00282007896221	0.00112803158488	0.00630733944954	0.00338409475465	0.00286697247706	0.00974770642202	0.00507614213198	0.00172018348624	0.0023768366465
FBgn0051988	0.0198555956679	0.00180505415162	0.00715071507151	0.00361010830325	0.0	0.00715071507151	0.0228640192539	0.001100110011	0.0023768366465
FBgn0000119	0.00282007896221	0.00112803158488	0.00630733944954	0.00338409475465	0.00286697247706	0.00974770642202	0.00507614213198	0.00172018348624	0.0023768366465
FBgn0030837	0.0198555956679	0.00180505415162	0.00715071507151	0.00361010830325	0.0	0.00715071507151	0.0228640192539	0.001100110011	0.0023768366465
FBgn0030830	0.0198555956679	0.00180505415162	0.00715071507151	0.00361010830325	0.0	0.00715071507151	0.0228640192539	0.001100110011	0.0023768366465
FBgn0030833	0.00282007896221	0.00112803158488	0.00630733944954	0.00338409475465	0.00286697247706	0.00974770642202	0.00507614213198	0.00172018348624	0.0023768366465
FBgn0030838	0.00282007896221	0.00112803158488	0.00630733944954	0.00338409475465	0.00286697247706	0.00974770642202	0.00507614213198	0.00172018348624	0.0023768366465
FBgn0000117	0.00282007896221	0.00112803158488	0.00630733944954	0.00338409475465	0.00286697247706	0.00974770642202	0.00507614213198	0.00172018348624	0.0023768366465
FBgn0036665	0.0198555956679	0.00180505415162	0.00715071507151	0.00361010830325	0.0	0.00715071507151	0.0228640192539	0.001100110011	0.0023768366465
FBgn0036662	0.00282007896221	0.00112803158488	0.00630733944954	0.00338409475465	0.00286697247706	0.00974770642202	0.00507614213198	0.00172018348624	0.0023768366465
FBgn0036661	0.00282007896221	0.00112803158488	0.00630733944954	0.00338409475465	0.00286697247706	0.00974770642202	0.00507614213198	0.00172018348624	0.0023768366465
FBgn0032744	0.00282007896221	0.00112803158488	0.00630733944954	0.00338409475465	0.00286697247706	0.00974770642202	0.00507614213198	0.00172018348624	0.0023768366465
FBgn0032741	0.0198555956679	0.00180505415162	0.00715071507151	0.00361010830325	0.0	0.00715071507151	0.0228640192539	0.001100110011	0.0023768366465
FBgn0032966	0.0198555956679	0.00180505415162	0.00715071507151	0.00361010830325	0.0	0.00715071507151	0.0228640192539	0.001100110011	0.0023768366465
FBgn0032967	0.0198555956679	0.00180505415162	0.00715071507151	0.00361010830325	0.0	0.00715071507151	0.0228640192539	0.001100110011	0.0023768366465
FBgn0001197	0.00282007896221	0.00112803158488	0.00630733944954	0.00338409475465	0.00286697247706	0.00974770642202	0.00507614213198	0.00172018348624	0.0023768366465
FBgn0033461	0.0198555956679	0.00180505415162	0.00715071507151	0.00361010830325	0.0	0.00715071507151	0.0228640192539	0.001100110011	0.0023768366465
FBgn0051326	0.0198555956679	0.00180505415162	0.00715071507151	0.00361010830325	0.0	0.00715071507151	0.0228640192539	0.001100110011	0.0023768366465
FBgn0030299	0.00282007896221	0.00112803158488	0.0401869158879	0.00338409475465	0.0140186915888	0.0691588785047	0.00507614213198	0.0130841121495	0.0023768366465
FBgn0005563	0.0198555956679	0.00180505415162	0.00715071507151	0.00361010830325	0.0	0.00715071507151	0.0228640192539	0.001100110011	0.0023768366465
FBgn0005564	0.0325814536341	0.015873015873	0.0401869158879	0.0392648287385	0.0140186915888	0.0691588785047	0.0651629072682	0.0130841121495	0.0023768366465
FBgn0003975	0.0325814536341	0.015873015873	0.0401869158879	0.0392648287385	0.0140186915888	0.0691588785047	0.0651629072682	0.0130841121495	0.0023768366465
FBgn0003970	0.0325814536341	0.015873015873	0.0401869158879	0.0392648287385	0.0140186915888	0.0691588785047	0.0651629072682	0.0130841121495	0.0023768366465
FBgn0013953	0.0325814536341	0.015873015873	0.0401869158879	0.0392648287385	0.0140186915888	0.0691588785047	0.0651629072682	0.0130841121495	0.0023768366465
FBgn0004619	0.0198555956679	0.00180505415162	0.00715071507151	0.00361010830325	0.0	0.00715071507151	0.0228640192539	0.001100110011	0.0023768366465
FBgn0004618	0.0198555956679	0.00180505415162	0.00715071507151	0.00361010830325	0.0	0.00715071507151	0.0228640192539	0.001100110011	0.0023768366465
FBgn0001222	0.00282007896221	0.00112803158488	0.00630733944954	0.00338409475465	0.00286697247706	0.00974770642202	0.00507614213198	0.00172018348624	0.0023768366465
FBgn0001225	0.0198555956679	0.00180505415162	0.00715071507151	0.00361010830325	0.0	0.00715071507151	0.0228640192539	0.001100110011	0.0023768366465
FBgn0001226	0.0325814536341	0.015873015873	0.0401869158879	0.0392648287385	0.0140186915888	0.0691588785047	0.0651629072682	0.0130841121495	0.0023768366465
FBgn0005694	0.00282007896221	0.00112803158488	0.00630733944954	0.00338409475465	0.00286697247706	0.00974770642202	0.00507614213198	0.00172018348624	0.0023768366465
FBgn0005695	0.00282007896221	0.00112803158488	0.00630733944954	0.00338409475465	0.00286697247706	0.00974770642202	0.00507614213198	0.00172018348624	0.0023768366465
FBgn0033566	0.00282007896221	0.00112803158488	0.00630733944954	0.00338409475465	0.00286697247706	0.00974770642202	0.00507614213198	0.00172018348624	0.0023768366465
FBgn0024150	0.0198555956679	0.00180505415162	0.00715071507151	0.00361010830325	0.0	0.00715071507151	0.0228640192539	0.001100110011	0.0023768366465
FBgn0035211	0.00282007896221	0.00112803158488	0.00630733944954	0.00338409475465	0.00286697247706	0.00974770642202	0.00507614213198	0.00172018348624	0.0023768366465
FBgn0024230	0.00282007896221	0.00112803158488	0.00630733944954	0.00338409475465	0.00286697247706	0.00974770642202	0.00507614213198	0.00172018348624	0.0023768366465
FBgn0000455	0.00282007896221	0.00112803158488	0.00630733944954	0.00338409475465	0.00286697247706	0.00974770642202	0.00507614213198	0.00172018348624	0.0023768366465
FBgn0033466	0.0325814536341	0.015873015873	0.0401869158879	0.0392648287385	0.0140186915888	0.0691588785047	0.0651629072682	0.0130841121495	0.0023768366465
FBgn0030252	0.0198555956679	0.00180505415162	0.00715071507151	0.00361010830325	0.0	0.00715071507151	0.0228640192539	0.001100110011	0.0023768366465
FBgn0038484	0.0198555956679	0.00180505415162	0.00715071507151	0.00361010830325	0.0	0.00715071507151	0.0228640192539	0.001100110011	0.0023768366465
FBgn0038486	0.0198555956679	0.00180505415162	0.00715071507151	0.00361010830325	0.0	0.00715071507151	0.0228640192539	0.001100110011	0.0023768366465
FBgn0038481	0.0198555956679	0.00180505415162	0.00715071507151	0.00361010830325	0.0	0.00715071507151	0.0228640192539	0.001100110011	0.0023768366465
FBgn0038951	0.00282007896221	0.00112803158488	0.00630733944954	0.00338409475465	0.00286697247706	0.00974770642202	0.00507614213198	0.00172018348624	0.0023768366465
FBgn0038488	0.00282007896221	0.00112803158488	0.00630733944954	0.00338409475465	0.00286697247706	0.00974770642202	0.00507614213198	0.00172018348624	0.0023768366465
FBgn0000459	0.0325814536341	0.015873015873	0.0401869158879	0.0392648287385	0.0140186915888	0.0691588785047	0.0651629072682	0.0130841121495	0.0023768366465
FBgn0042118	0.0198555956679	0.00180505415162	0.00715071507151	0.00361010830325	0.0	0.00715071507151	0.0228640192539	0.001100110011	0.0023768366465
FBgn0036732	0.0325814536341	0.015873015873	0.0401869158879	0.0392648287385	0.0140186915888	0.0691588785047	0.0651629072682	0.0130841121495	0.0023768366465
FBgn0003598	0.00282007896221	0.00112803158488	0.00630733944954	0.00338409475465	0.00286697247706	0.00974770642202	0.00507614213198	0.00172018348624	0.0023768366465
FBgn0031431	0.0198555956679	0.00180505415162	0.00715071507151	0.00361010830325	0.0	0.00715071507151	0.0228640192539	0.001100110011	0.0023768366465
FBgn0019929	0.0198555956679	0.00180505415162	0.00715071507151	0.00361010830325	0.0	0.00715071507151	0.0228640192539	0.001100110011	0.0023768366465
FBgn0036738	0.0198555956679	0.00180505415162	0.00715071507151	0.00361010830325	0.0	0.00715071507151	0.0228640192539	0.001100110011	0.0023768366465
FBgn0052405	0.0198555956679	0.00180505415162	0.00715071507151	0.00361010830325	0.0	0.00715071507151	0.0228640192539	0.001100110011	0.0023768366465
FBgn0052406	0.0325814536341	0.015873015873	0.00715071507151	0.0392648287385	0.0	0.00715071507151	0.0651629072682	0.001100110011	0.0023768366465
FBgn0036992	0.0198555956679	0.00180505415162	0.00715071507151	0.00361010830325	0.0	0.00715071507151	0.0228640192539	0.001100110011	0.0023768366465
FBgn0029512	0.00282007896221	0.00112803158488	0.00630733944954	0.00338409475465	0.00286697247706	0.00974770642202	0.00507614213198	0.00172018348624	0.0023768366465
FBgn0029514	0.00282007896221	0.00112803158488	0.00630733944954	0.00338409475465	0.00286697247706	0.00974770642202	0.00507614213198	0.00172018348624	0.0023768366465
FBgn0000477	0.0198555956679	0.00180505415162	0.0401869158879	0.00361010830325	0.0140186915888	0.0691588785047	0.0228640192539	0.0130841121495	0.0023768366465
FBgn0000479	0.0325814536341	0.015873015873	0.00715071507151	0.0392648287385	0.0	0.00715071507151	0.0651629072682	0.001100110011	0.0023768366465
FBgn0004838	0.00282007896221	0.00112803158488	0.00630733944954	0.00338409475465	0.00286697247706	0.00974770642202	0.00507614213198	0.00172018348624	0.0023768366465
FBgn0036046	0.0198555956679	0.00180505415162	0.00715071507151	0.00361010830325	0.0	0.00715071507151	0.0228640192539	0.001100110011	0.0023768366465
FBgn0031465	0.0198555956679	0.00180505415162	0.00715071507151	0.00361010830325	0.0	0.00715071507151	0.0228640192539	0.001100110011	0.0023768366465
FBgn0031467	0.0198555956679	0.00180505415162	0.00715071507151	0.00361010830325	0.0	0.00715071507151	0.0228640192539	0.001100110011	0.0023768366465
FBgn0031461	0.0325814536341	0.015873015873	0.0401869158879	0.0392648287385	0.0140186915888	0.0691588785047	0.0651629072682	0.0130841121495	0.0023768366465
FBgn0037101	0.0198555956679	0.00180505415162	0.00715071507151	0.00361010830325	0.0	0.00715071507151	0.0228640192539	0.001100110011	0.0023768366465
FBgn0030332	0.0198555956679	0.00180505415162	0.00715071507151	0.00361010830325	0.0	0.00715071507151	0.0228640192539	0.001100110011	0.0023768366465
FBgn0030485	0.00282007896221	0.00112803158488	0.00630733944954	0.00338409475465	0.00286697247706	0.00974770642202	0.00507614213198	0.00172018348624	0.0023768366465
FBgn0030481	0.00282007896221	0.00112803158488	0.00630733944954	0.00338409475465	0.00286697247706	0.00974770642202	0.00507614213198	0.00172018348624	0.0023768366465
FBgn0004784	0.0198555956679	0.00180505415162	0.00715071507151	0.00361010830325	0.0	0.00715071507151	0.0228640192539	0.001100110011	0.0023768366465
FBgn0000617	0.00282007896221	0.00112803158488	0.00630733944954	0.00338409475465	0.00286697247706	0.00974770642202	0.00507614213198	0.00172018348624	0.0023768366465
FBgn0000615	0.00282007896221	0.00112803158488	0.00630733944954	0.00338409475465	0.00286697247706	0.00974770642202	0.00507614213198	0.00172018348624	0.0023768366465
FBgn0036040	0.0198555956679	0.00180505415162	0.00715071507151	0.00361010830325	0.0	0.00715071507151	0.0228640192539	0.001100110011	0.0023768366465
FBgn0031682	0.00282007896221	0.00112803158488	0.00630733944954	0.00338409475465	0.00286697247706	0.00974770642202	0.00507614213198	0.00172018348624	0.0023768366465
FBgn0031683	0.0325814536341	0.015873015873	0.0401869158879	0.0392648287385	0.0140186915888	0.0691588785047	0.0651629072682	0.0130841121495	0.0023768366465
FBgn0015924	0.00282007896221	0.00112803158488	0.00630733944954	0.00338409475465	0.00286697247706	0.00974770642202	0.00507614213198	0.00172018348624	0.0023768366465
FBgn0031689	0.0198555956679	0.00180505415162	0.00715071507151	0.00361010830325	0.0	0.00715071507151	0.0228640192539	0.001100110011	0.0023768366465
FBgn0015929	0.0325814536341	0.015873015873	0.00630733944954	0.0392648287385	0.00286697247706	0.00974770642202	0.0651629072682	0.00172018348624	0.0023768366465
FBgn0000639	0.0198555956679	0.00180505415162	0.00715071507151	0.00361010830325	0.0	0.00715071507151	0.0228640192539	0.001100110011	0.0023768366465
FBgn0014032	0.0198555956679	0.00180505415162	0.00715071507151	0.00361010830325	0.0	0.00715071507151	0.0228640192539	0.001100110011	0.0023768366465
FBgn0030317	0.0198555956679	0.00180505415162	0.0401869158879	0.00361010830325	0.0140186915888	0.0691588785047	0.0228640192539	0.0130841121495	0.0023768366465
FBgn0030158	0.0198555956679	0.00180505415162	0.00715071507151	0.00361010830325	0.0	0.00715071507151	0.0228640192539	0.001100110011	0.0023768366465
FBgn0030311	0.00282007896221	0.00112803158488	0.00630733944954	0.00338409475465	0.00286697247706	0.00974770642202	0.00507614213198	0.00172018348624	0.0023768366465
FBgn0037473	0.0325814536341	0.015873015873	0.0401869158879	0.0392648287385	0.0140186915888	0.0691588785047	0.0651629072682	0.0130841121495	0.0023768366465
FBgn0034304	0.00282007896221	0.00112803158488	0.00630733944954	0.00338409475465	0.00286697247706	0.00974770642202	0.00507614213198	0.00172018348624	0.0023768366465
FBgn0033350	0.00282007896221	0.00112803158488	0.00630733944954	0.00338409475465	0.00286697247706	0.00974770642202	0.00507614213198	0.00172018348624	0.0023768366465
FBgn0015230	0.0198555956679	0.00180505415162	0.00715071507151	0.00361010830325	0.0	0.00715071507151	0.0228640192539	0.001100110011	0.0023768366465
FBgn0011592	0.00282007896221	0.00112803158488	0.00630733944954	0.00338409475465	0.00286697247706	0.00974770642202	0.00507614213198	0.00172018348624	0.0023768366465
FBgn0034816	0.0325814536341	0.015873015873	0.0401869158879	0.0392648287385	0.0140186915888	0.0691588785047	0.0651629072682	0.0130841121495	0.0023768366465
FBgn0010198	0.00282007896221	0.00112803158488	0.00630733944954	0.00338409475465	0.00286697247706	0.00974770642202	0.00507614213198	0.00172018348624	0.0023768366465
FBgn0038302	0.0325814536341	0.015873015873	0.0401869158879	0.0392648287385	0.0140186915888	0.0691588785047	0.0651629072682	0.0130841121495	0.0023768366465
FBgn0038303	0.00282007896221	0.00112803158488	0.00630733944954	0.00338409475465	0.00286697247706	0.00974770642202	0.00507614213198	0.00172018348624	0.0023768366465
FBgn0031437	0.00282007896221	0.00112803158488	0.00630733944954	0.00338409475465	0.00286697247706	0.00974770642202	0.00507614213198	0.00172018348624	0.0023768366465
FBgn0033680	0.0198555956679	0.00180505415162	0.00715071507151	0.00361010830325	0.0	0.00715071507151	0.0228640192539	0.001100110011	0.0023768366465
FBgn0033686	0.0325814536341	0.015873015873	0.0401869158879	0.0392648287385	0.0140186915888	0.0691588785047	0.0651629072682	0.0130841121495	0.0023768366465
FBgn0033174	0.0325814536341	0.015873015873	0.0401869158879	0.0392648287385	0.0140186915888	0.0691588785047	0.0651629072682	0.0130841121495	0.0023768366465
FBgn0036416	0.0198555956679	0.00180505415162	0.00715071507151	0.00361010830325	0.0	0.00715071507151	0.0228640192539	0.001100110011	0.0023768366465
FBgn0033170	0.0198555956679	0.00180505415162	0.0401869158879	0.00361010830325	0.0140186915888	0.0691588785047	0.0228640192539	0.0130841121495	0.0023768366465
FBgn0013563	0.00282007896221	0.00112803158488	0.00630733944954	0.00338409475465	0.00286697247706	0.00974770642202	0.00507614213198	0.00172018348624	0.0023768366465
FBgn0033178	0.00282007896221	0.00112803158488	0.00630733944954	0.00338409475465	0.00286697247706	0.00974770642202	0.00507614213198	0.00172018348624	0.0023768366465
FBgn0051849	0.00282007896221	0.00112803158488	0.00630733944954	0.00338409475465	0.00286697247706	0.00974770642202	0.00507614213198	0.00172018348624	0.0023768366465
FBgn0032889	0.0325814536341	0.015873015873	0.0401869158879	0.0392648287385	0.0140186915888	0.0691588785047	0.0651629072682	0.0130841121495	0.0023768366465
FBgn0032886	0.0325814536341	0.015873015873	0.0401869158879	0.0392648287385	0.0140186915888	0.0691588785047	0.0651629072682	0.0130841121495	0.0023768366465
FBgn0032884	0.00282007896221	0.00112803158488	0.00630733944954	0.00338409475465	0.00286697247706	0.00974770642202	0.00507614213198	0.00172018348624	0.0023768366465
FBgn0032883	0.00282007896221	0.00112803158488	0.00630733944954	0.00338409475465	0.00286697247706	0.00974770642202	0.00507614213198	0.00172018348624	0.0023768366465
FBgn0032882	0.0325814536341	0.015873015873	0.0401869158879	0.0392648287385	0.0140186915888	0.0691588785047	0.0651629072682	0.0130841121495	0.0023768366465
FBgn0004574	0.00282007896221	0.00112803158488	0.00630733944954	0.00338409475465	0.00286697247706	0.00974770642202	0.00507614213198	0.00172018348624	0.0023768366465
FBgn0004573	0.0198555956679	0.00180505415162	0.00715071507151	0.00361010830325	0.0	0.00715071507151	0.0228640192539	0.001100110011	0.0023768366465
FBgn0025833	0.0198555956679	0.00180505415162	0.00715071507151	0.00361010830325	0.0	0.00715071507151	0.0228640192539	0.001100110011	0.0023768366465
FBgn0013749	0.00282007896221	0.00112803158488	0.00630733944954	0.00338409475465	0.00286697247706	0.00974770642202	0.00507614213198	0.00172018348624	0.0023768366465
FBgn0030792	0.00282007896221	0.00112803158488	0.00630733944954	0.00338409475465	0.00286697247706	0.00974770642202	0.00507614213198	0.00172018348624	0.0023768366465
FBgn0003053	0.0325814536341	0.015873015873	0.0401869158879	0.0392648287385	0.0140186915888	0.0691588785047	0.0651629072682	0.0130841121495	0.0023768366465
FBgn0032087	0.0325814536341	0.015873015873	0.00715071507151	0.0392648287385	0.0	0.00715071507151	0.0651629072682	0.001100110011	0.0023768366465
FBgn0032082	0.0198555956679	0.00180505415162	0.00715071507151	0.00361010830325	0.0	0.00715071507151	0.0228640192539	0.001100110011	0.0023768366465
FBgn0032089	0.0198555956679	0.00180505415162	0.00715071507151	0.00361010830325	0.0	0.00715071507151	0.0228640192539	0.001100110011	0.0023768366465
FBgn0032088	0.0325814536341	0.015873015873	0.00715071507151	0.0392648287385	0.0	0.00715071507151	0.0651629072682	0.001100110011	0.0023768366465
FBgn0025352	0.00282007896221	0.00112803158488	0.0401869158879	0.00338409475465	0.0140186915888	0.0691588785047	0.00507614213198	0.0130841121495	0.0023768366465
FBgn0028582	0.00282007896221	0.00112803158488	0.00630733944954	0.00338409475465	0.00286697247706	0.00974770642202	0.00507614213198	0.00172018348624	0.0023768366465
FBgn0052109	0.0325814536341	0.015873015873	0.0401869158879	0.0392648287385	0.0140186915888	0.0691588785047	0.0651629072682	0.0130841121495	0.0023768366465
FBgn0039232	0.0198555956679	0.00180505415162	0.00715071507151	0.00361010830325	0.0	0.00715071507151	0.0228640192539	0.001100110011	0.0023768366465
FBgn0039235	0.0198555956679	0.00180505415162	0.00715071507151	0.00361010830325	0.0	0.00715071507151	0.0228640192539	0.001100110011	0.0023768366465
FBgn0039234	0.00282007896221	0.00112803158488	0.00630733944954	0.00338409475465	0.00286697247706	0.00974770642202	0.00507614213198	0.00172018348624	0.0023768366465
FBgn0039237	0.0198555956679	0.00180505415162	0.00715071507151	0.00361010830325	0.0	0.00715071507151	0.0228640192539	0.001100110011	0.0023768366465
FBgn0029723	0.0198555956679	0.00180505415162	0.00715071507151	0.00361010830325	0.0	0.00715071507151	0.0228640192539	0.001100110011	0.0023768366465
FBgn0026372	0.00282007896221	0.00112803158488	0.00630733944954	0.00338409475465	0.00286697247706	0.00974770642202	0.00507614213198	0.00172018348624	0.0023768366465
FBgn0035685	0.0325814536341	0.015873015873	0.00715071507151	0.0392648287385	0.0	0.00715071507151	0.0651629072682	0.001100110011	0.0023768366465
FBgn0033076	0.0198555956679	0.00180505415162	0.00715071507151	0.00361010830325	0.0	0.00715071507151	0.0228640192539	0.001100110011	0.0023768366465
FBgn0015300	0.0198555956679	0.00180505415162	0.00715071507151	0.00361010830325	0.0	0.00715071507151	0.0228640192539	0.001100110011	0.0023768366465
FBgn0044817	0.0198555956679	0.00180505415162	0.00715071507151	0.00361010830325	0.0	0.00715071507151	0.0228640192539	0.001100110011	0.0023768366465
FBgn0038470	0.0325814536341	0.015873015873	0.00630733944954	0.0392648287385	0.00286697247706	0.00974770642202	0.0651629072682	0.00172018348624	0.0023768366465
FBgn0016047	0.0198555956679	0.00180505415162	0.00715071507151	0.00361010830325	0.0	0.00715071507151	0.0228640192539	0.001100110011	0.0023768366465
FBgn0003366	0.0198555956679	0.00180505415162	0.00715071507151	0.00361010830325	0.0	0.00715071507151	0.0228640192539	0.001100110011	0.0023768366465
FBgn0003360	0.0325814536341	0.015873015873	0.0401869158879	0.0392648287385	0.0140186915888	0.0691588785047	0.0651629072682	0.0130841121495	0.0023768366465
FBgn0015582	0.00282007896221	0.00112803158488	0.00630733944954	0.00338409475465	0.00286697247706	0.00974770642202	0.00507614213198	0.00172018348624	0.0023768366465
FBgn0040968	0.0198555956679	0.00180505415162	0.00715071507151	0.00361010830325	0.0	0.00715071507151	0.0228640192539	0.001100110011	0.0023768366465
FBgn0035028	0.0325814536341	0.015873015873	0.0401869158879	0.0392648287385	0.0140186915888	0.0691588785047	0.0651629072682	0.0130841121495	0.0023768366465
FBgn0038545	0.00282007896221	0.00112803158488	0.00630733944954	0.00338409475465	0.00286697247706	0.00974770642202	0.00507614213198	0.00172018348624	0.0023768366465
FBgn0027534	0.00282007896221	0.00112803158488	0.00630733944954	0.00338409475465	0.00286697247706	0.00974770642202	0.00507614213198	0.00172018348624	0.0023768366465
FBgn0029989	0.0198555956679	0.00180505415162	0.00715071507151	0.00361010830325	0.0	0.00715071507151	0.0228640192539	0.001100110011	0.0023768366465
FBgn0029980	0.00282007896221	0.00112803158488	0.00630733944954	0.00338409475465	0.00286697247706	0.00974770642202	0.00507614213198	0.00172018348624	0.0023768366465
FBgn0029987	0.0198555956679	0.00180505415162	0.00715071507151	0.00361010830325	0.0	0.00715071507151	0.0228640192539	0.001100110011	0.0023768366465
FBgn0031855	0.0198555956679	0.00180505415162	0.00715071507151	0.00361010830325	0.0	0.00715071507151	0.0228640192539	0.001100110011	0.0023768366465
FBgn0031850	0.0325814536341	0.015873015873	0.0401869158879	0.0392648287385	0.0140186915888	0.0691588785047	0.0651629072682	0.0130841121495	0.0023768366465
FBgn0031859	0.0198555956679	0.00180505415162	0.00715071507151	0.00361010830325	0.0	0.00715071507151	0.0228640192539	0.001100110011	0.0023768366465
FBgn0031858	0.0198555956679	0.00180505415162	0.00715071507151	0.00361010830325	0.0	0.00715071507151	0.0228640192539	0.001100110011	0.0023768366465
FBgn0052452	0.00282007896221	0.00112803158488	0.00630733944954	0.00338409475465	0.00286697247706	0.00974770642202	0.00507614213198	0.00172018348624	0.0023768366465
FBgn0034318	0.0198555956679	0.00180505415162	0.00715071507151	0.00361010830325	0.0	0.00715071507151	0.0228640192539	0.001100110011	0.0023768366465
FBgn0031148	0.0325814536341	0.015873015873	0.0401869158879	0.0392648287385	0.0140186915888	0.0691588785047	0.0651629072682	0.0130841121495	0.0023768366465
FBgn0034647	0.0325814536341	0.015873015873	0.0401869158879	0.0392648287385	0.0140186915888	0.0691588785047	0.0651629072682	0.0130841121495	0.0023768366465
FBgn0034313	0.00282007896221	0.00112803158488	0.00630733944954	0.00338409475465	0.00286697247706	0.00974770642202	0.00507614213198	0.00172018348624	0.0023768366465
FBgn0034312	0.00282007896221	0.00112803158488	0.0401869158879	0.00338409475465	0.0140186915888	0.0691588785047	0.00507614213198	0.0130841121495	0.0023768366465
FBgn0034643	0.00282007896221	0.00112803158488	0.00630733944954	0.00338409475465	0.00286697247706	0.00974770642202	0.00507614213198	0.00172018348624	0.0023768366465
FBgn0015247	0.00282007896221	0.00112803158488	0.00630733944954	0.00338409475465	0.00286697247706	0.00974770642202	0.00507614213198	0.00172018348624	0.0023768366465
FBgn0038150	0.0325814536341	0.015873015873	0.0401869158879	0.0392648287385	0.0140186915888	0.0691588785047	0.0651629072682	0.0130841121495	0.0023768366465
FBgn0034068	0.00282007896221	0.00112803158488	0.00630733944954	0.00338409475465	0.00286697247706	0.00974770642202	0.00507614213198	0.00172018348624	0.0023768366465
FBgn0026188	0.00282007896221	0.00112803158488	0.0401869158879	0.00338409475465	0.0140186915888	0.0691588785047	0.00507614213198	0.0130841121495	0.0023768366465
FBgn0040950	0.0198555956679	0.00180505415162	0.00715071507151	0.00361010830325	0.0	0.00715071507151	0.0228640192539	0.001100110011	0.0023768366465
FBgn0040227	0.00282007896221	0.00112803158488	0.00630733944954	0.00338409475465	0.00286697247706	0.00974770642202	0.00507614213198	0.00172018348624	0.0023768366465
FBgn0015025	0.0325814536341	0.015873015873	0.00630733944954	0.0392648287385	0.00286697247706	0.00974770642202	0.0651629072682	0.00172018348624	0.0023768366465
FBgn0040954	0.00282007896221	0.00112803158488	0.00630733944954	0.00338409475465	0.00286697247706	0.00974770642202	0.00507614213198	0.00172018348624	0.0023768366465
FBgn0010053	0.0198555956679	0.00180505415162	0.0401869158879	0.00361010830325	0.0140186915888	0.0691588785047	0.0228640192539	0.0130841121495	0.0023768366465
FBgn0026323	0.00282007896221	0.00112803158488	0.00630733944954	0.00338409475465	0.00286697247706	0.00974770642202	0.00507614213198	0.00172018348624	0.0023768366465
FBgn0023130	0.00282007896221	0.00112803158488	0.00630733944954	0.00338409475465	0.00286697247706	0.00974770642202	0.00507614213198	0.00172018348624	0.0023768366465
FBgn0051619	0.0325814536341	0.015873015873	0.00715071507151	0.0392648287385	0.0	0.00715071507151	0.0651629072682	0.001100110011	0.0023768366465
FBgn0000286	0.00282007896221	0.00112803158488	0.00630733944954	0.00338409475465	0.00286697247706	0.00974770642202	0.00507614213198	0.00172018348624	0.0023768366465
FBgn0000287	0.0198555956679	0.00180505415162	0.00715071507151	0.00361010830325	0.0	0.00715071507151	0.0228640192539	0.001100110011	0.0023768366465
FBgn0027584	0.0198555956679	0.00180505415162	0.00715071507151	0.00361010830325	0.0	0.00715071507151	0.0228640192539	0.001100110011	0.0023768366465
FBgn0027585	0.0325814536341	0.015873015873	0.00715071507151	0.0392648287385	0.0	0.00715071507151	0.0651629072682	0.001100110011	0.0023768366465
FBgn0027586	0.0198555956679	0.00180505415162	0.00715071507151	0.00361010830325	0.0	0.00715071507151	0.0228640192539	0.001100110011	0.0023768366465
FBgn0027587	0.00282007896221	0.00112803158488	0.00630733944954	0.00338409475465	0.00286697247706	0.00974770642202	0.00507614213198	0.00172018348624	0.0023768366465
FBgn0051472	0.0325814536341	0.015873015873	0.0401869158879	0.0392648287385	0.0140186915888	0.0691588785047	0.0651629072682	0.0130841121495	0.0023768366465
FBgn0030814	0.0198555956679	0.00180505415162	0.00715071507151	0.00361010830325	0.0	0.00715071507151	0.0228640192539	0.001100110011	0.0023768366465
FBgn0030813	0.00282007896221	0.00112803158488	0.00630733944954	0.00338409475465	0.00286697247706	0.00974770642202	0.00507614213198	0.00172018348624	0.0023768366465
FBgn0000137	0.0325814536341	0.015873015873	0.0401869158879	0.0392648287385	0.0140186915888	0.0691588785047	0.0651629072682	0.0130841121495	0.0023768366465
FBgn0036643	0.00282007896221	0.00112803158488	0.00630733944954	0.00338409475465	0.00286697247706	0.00974770642202	0.00507614213198	0.00172018348624	0.0023768366465
FBgn0036648	0.0325814536341	0.015873015873	0.0401869158879	0.0392648287385	0.0140186915888	0.0691588785047	0.0651629072682	0.0130841121495	0.0023768366465
FBgn0032946	0.0325814536341	0.015873015873	0.00715071507151	0.0392648287385	0.0	0.00715071507151	0.0651629072682	0.001100110011	0.0023768366465
FBgn0032945	0.0325814536341	0.015873015873	0.00715071507151	0.0392648287385	0.0	0.00715071507151	0.0651629072682	0.001100110011	0.0023768366465
FBgn0004903	0.00282007896221	0.00112803158488	0.00630733944954	0.00338409475465	0.00286697247706	0.00974770642202	0.00507614213198	0.00172018348624	0.0023768366465
FBgn0032769	0.0198555956679	0.00180505415162	0.00715071507151	0.00361010830325	0.0	0.00715071507151	0.0228640192539	0.001100110011	0.0023768366465
FBgn0033322	0.0198555956679	0.00180505415162	0.00715071507151	0.00361010830325	0.0	0.00715071507151	0.0228640192539	0.001100110011	0.0023768366465
FBgn0020440	0.00282007896221	0.00112803158488	0.00630733944954	0.00338409475465	0.00286697247706	0.00974770642202	0.00507614213198	0.00172018348624	0.0023768366465
FBgn0053110	0.0198555956679	0.00180505415162	0.00715071507151	0.00361010830325	0.0	0.00715071507151	0.0228640192539	0.001100110011	0.0023768366465
FBgn0053113	0.00282007896221	0.00112803158488	0.00630733944954	0.00338409475465	0.00286697247706	0.00974770642202	0.00507614213198	0.00172018348624	0.0023768366465
FBgn0032340	0.00282007896221	0.00112803158488	0.00630733944954	0.00338409475465	0.00286697247706	0.00974770642202	0.00507614213198	0.00172018348624	0.0023768366465
FBgn0011828	0.0198555956679	0.00180505415162	0.00715071507151	0.00361010830325	0.0	0.00715071507151	0.0228640192539	0.001100110011	0.0023768366465
FBgn0032341	0.00282007896221	0.00112803158488	0.00630733944954	0.00338409475465	0.00286697247706	0.00974770642202	0.00507614213198	0.00172018348624	0.0023768366465
FBgn0032614	0.0325814536341	0.015873015873	0.00715071507151	0.0392648287385	0.0	0.00715071507151	0.0651629072682	0.001100110011	0.0023768366465
FBgn0033549	0.00282007896221	0.00112803158488	0.00630733944954	0.00338409475465	0.00286697247706	0.00974770642202	0.00507614213198	0.00172018348624	0.0023768366465
FBgn0033540	0.00282007896221	0.00112803158488	0.00630733944954	0.00338409475465	0.00286697247706	0.00974770642202	0.00507614213198	0.00172018348624	0.0023768366465
FBgn0033543	0.0325814536341	0.015873015873	0.0401869158879	0.0392648287385	0.0140186915888	0.0691588785047	0.0651629072682	0.0130841121495	0.0023768366465
FBgn0039867	0.00282007896221	0.00112803158488	0.00630733944954	0.00338409475465	0.00286697247706	0.00974770642202	0.00507614213198	0.00172018348624	0.0023768366465
FBgn0035234	0.0198555956679	0.00180505415162	0.00715071507151	0.00361010830325	0.0	0.00715071507151	0.0228640192539	0.001100110011	0.0023768366465
FBgn0035236	0.00282007896221	0.00112803158488	0.00630733944954	0.00338409475465	0.00286697247706	0.00974770642202	0.00507614213198	0.00172018348624	0.0023768366465
FBgn0035231	0.0198555956679	0.00180505415162	0.0401869158879	0.00361010830325	0.0140186915888	0.0691588785047	0.0228640192539	0.0130841121495	0.0023768366465
FBgn0033374	0.0198555956679	0.00180505415162	0.0401869158879	0.00361010830325	0.0140186915888	0.0691588785047	0.0228640192539	0.0130841121495	0.0023768366465
FBgn0035233	0.00282007896221	0.00112803158488	0.00630733944954	0.00338409475465	0.00286697247706	0.00974770642202	0.00507614213198	0.00172018348624	0.0023768366465
FBgn0035232	0.00282007896221	0.00112803158488	0.00630733944954	0.00338409475465	0.00286697247706	0.00974770642202	0.00507614213198	0.00172018348624	0.0023768366465
FBgn0033375	0.00282007896221	0.00112803158488	0.00630733944954	0.00338409475465	0.00286697247706	0.00974770642202	0.00507614213198	0.00172018348624	0.0023768366465
FBgn0035238	0.00282007896221	0.00112803158488	0.00630733944954	0.00338409475465	0.00286697247706	0.00974770642202	0.00507614213198	0.00172018348624	0.0023768366465
FBgn0032310	0.0198555956679	0.00180505415162	0.00715071507151	0.00361010830325	0.0	0.00715071507151	0.0228640192539	0.001100110011	0.0023768366465
FBgn0037307	0.0198555956679	0.00180505415162	0.00715071507151	0.00361010830325	0.0	0.00715071507151	0.0228640192539	0.001100110011	0.0023768366465
FBgn0038979	0.0198555956679	0.00180505415162	0.00715071507151	0.00361010830325	0.0	0.00715071507151	0.0228640192539	0.001100110011	0.0023768366465
FBgn0038973	0.0198555956679	0.00180505415162	0.0401869158879	0.00361010830325	0.0140186915888	0.0691588785047	0.0228640192539	0.0130841121495	0.0023768366465
FBgn0038972	0.0325814536341	0.015873015873	0.00715071507151	0.0392648287385	0.0	0.00715071507151	0.0651629072682	0.001100110011	0.0023768366465
FBgn0052647	0.0198555956679	0.00180505415162	0.00715071507151	0.00361010830325	0.0	0.00715071507151	0.0228640192539	0.001100110011	0.0023768366465
FBgn0028572	0.0325814536341	0.015873015873	0.0401869158879	0.0392648287385	0.0140186915888	0.0691588785047	0.0651629072682	0.0130841121495	0.0023768366465
FBgn0028573	0.0198555956679	0.00180505415162	0.00715071507151	0.00361010830325	0.0	0.00715071507151	0.0228640192539	0.001100110011	0.0023768366465
FBgn0031908	0.0325814536341	0.015873015873	0.00715071507151	0.0392648287385	0.0	0.00715071507151	0.0651629072682	0.001100110011	0.0023768366465
FBgn0031907	0.0198555956679	0.00180505415162	0.00715071507151	0.00361010830325	0.0	0.00715071507151	0.0228640192539	0.001100110011	0.0023768366465
FBgn0031906	0.0198555956679	0.00180505415162	0.00715071507151	0.00361010830325	0.0	0.00715071507151	0.0228640192539	0.001100110011	0.0023768366465
FBgn0042177	0.0325814536341	0.015873015873	0.0401869158879	0.0392648287385	0.0140186915888	0.0691588785047	0.0651629072682	0.0130841121495	0.0023768366465
FBgn0031904	0.00282007896221	0.00112803158488	0.00630733944954	0.00338409475465	0.00286697247706	0.00974770642202	0.00507614213198	0.00172018348624	0.0023768366465
FBgn0052396	0.0198555956679	0.00180505415162	0.00715071507151	0.00361010830325	0.0	0.00715071507151	0.0228640192539	0.001100110011	0.0023768366465
FBgn0052393	0.00282007896221	0.00112803158488	0.00630733944954	0.00338409475465	0.00286697247706	0.00974770642202	0.00507614213198	0.00172018348624	0.0023768366465
FBgn0052392	0.0198555956679	0.00180505415162	0.00715071507151	0.00361010830325	0.0	0.00715071507151	0.0228640192539	0.001100110011	0.0023768366465
FBgn0037891	0.00282007896221	0.00112803158488	0.0401869158879	0.00338409475465	0.0140186915888	0.0691588785047	0.00507614213198	0.0130841121495	0.0023768366465
FBgn0037897	0.00282007896221	0.00112803158488	0.00630733944954	0.00338409475465	0.00286697247706	0.00974770642202	0.00507614213198	0.00172018348624	0.0023768366465
FBgn0037895	0.0198555956679	0.00180505415162	0.00715071507151	0.00361010830325	0.0	0.00715071507151	0.0228640192539	0.001100110011	0.0023768366465
FBgn0037894	0.0325814536341	0.015873015873	0.0401869158879	0.0392648287385	0.0140186915888	0.0691588785047	0.0651629072682	0.0130841121495	0.0023768366465
FBgn0004171	0.0198555956679	0.00180505415162	0.00715071507151	0.00361010830325	0.0	0.00715071507151	0.0228640192539	0.001100110011	0.0023768366465
FBgn0032688	0.00282007896221	0.00112803158488	0.00630733944954	0.00338409475465	0.00286697247706	0.00974770642202	0.00507614213198	0.00172018348624	0.0023768366465
FBgn0000451	0.0325814536341	0.015873015873	0.00715071507151	0.0392648287385	0.0	0.00715071507151	0.0651629072682	0.001100110011	0.0023768366465
FBgn0039140	0.00282007896221	0.00112803158488	0.00630733944954	0.00338409475465	0.00286697247706	0.00974770642202	0.00507614213198	0.00172018348624	0.0023768366465
FBgn0039147	0.0198555956679	0.00180505415162	0.0401869158879	0.00361010830325	0.0140186915888	0.0691588785047	0.0228640192539	0.0130841121495	0.0023768366465
FBgn0039145	0.00282007896221	0.00112803158488	0.0401869158879	0.00338409475465	0.0140186915888	0.0691588785047	0.00507614213198	0.0130841121495	0.0023768366465
FBgn0030178	0.00282007896221	0.00112803158488	0.00630733944954	0.00338409475465	0.00286697247706	0.00974770642202	0.00507614213198	0.00172018348624	0.0023768366465
FBgn0034127	0.0198555956679	0.00180505415162	0.00715071507151	0.00361010830325	0.0	0.00715071507151	0.0228640192539	0.001100110011	0.0023768366465
FBgn0031333	0.0198555956679	0.00180505415162	0.00715071507151	0.00361010830325	0.0	0.00715071507151	0.0228640192539	0.001100110011	0.0023768366465
FBgn0031335	0.0198555956679	0.00180505415162	0.00715071507151	0.00361010830325	0.0	0.00715071507151	0.0228640192539	0.001100110011	0.0023768366465
FBgn0031440	0.0198555956679	0.00180505415162	0.00715071507151	0.00361010830325	0.0	0.00715071507151	0.0228640192539	0.001100110011	0.0023768366465
FBgn0036576	0.0198555956679	0.00180505415162	0.0401869158879	0.00361010830325	0.0140186915888	0.0691588785047	0.0228640192539	0.0130841121495	0.0023768366465
FBgn0037475	0.0325814536341	0.015873015873	0.0401869158879	0.0392648287385	0.0140186915888	0.0691588785047	0.0651629072682	0.0130841121495	0.0023768366465
FBgn0037472	0.00282007896221	0.00112803158488	0.00630733944954	0.00338409475465	0.00286697247706	0.00974770642202	0.00507614213198	0.00172018348624	0.0023768366465
FBgn0000636	0.00282007896221	0.00112803158488	0.00630733944954	0.00338409475465	0.00286697247706	0.00974770642202	0.00507614213198	0.00172018348624	0.0023768366465
FBgn0011591	0.0325814536341	0.015873015873	0.0401869158879	0.0392648287385	0.0140186915888	0.0691588785047	0.0651629072682	0.0130841121495	0.0023768366465
FBgn0011224	0.0325814536341	0.015873015873	0.0401869158879	0.0392648287385	0.0140186915888	0.0691588785047	0.0651629072682	0.0130841121495	0.0023768366465
FBgn0039494	0.0198555956679	0.00180505415162	0.00715071507151	0.00361010830325	0.0	0.00715071507151	0.0228640192539	0.001100110011	0.0023768366465
FBgn0015240	0.00282007896221	0.00112803158488	0.00630733944954	0.00338409475465	0.00286697247706	0.00974770642202	0.00507614213198	0.00172018348624	0.0023768366465
FBgn0039492	0.00282007896221	0.00112803158488	0.00630733944954	0.00338409475465	0.00286697247706	0.00974770642202	0.00507614213198	0.00172018348624	0.0023768366465
FBgn0039498	0.0198555956679	0.00180505415162	0.00715071507151	0.00361010830325	0.0	0.00715071507151	0.0228640192539	0.001100110011	0.0023768366465
FBgn0030174	0.0198555956679	0.00180505415162	0.00715071507151	0.00361010830325	0.0	0.00715071507151	0.0228640192539	0.001100110011	0.0023768366465
FBgn0015904	0.0325814536341	0.015873015873	0.0401869158879	0.0392648287385	0.0140186915888	0.0691588785047	0.0651629072682	0.0130841121495	0.0023768366465
FBgn0002641	0.00282007896221	0.00112803158488	0.0401869158879	0.00338409475465	0.0140186915888	0.0691588785047	0.00507614213198	0.0130841121495	0.0023768366465
FBgn0030506	0.00282007896221	0.00112803158488	0.00630733944954	0.00338409475465	0.00286697247706	0.00974770642202	0.00507614213198	0.00172018348624	0.0023768366465
FBgn0030500	0.00282007896221	0.00112803158488	0.00630733944954	0.00338409475465	0.00286697247706	0.00974770642202	0.00507614213198	0.00172018348624	0.0023768366465
FBgn0030503	0.0325814536341	0.015873015873	0.0401869158879	0.0392648287385	0.0140186915888	0.0691588785047	0.0651629072682	0.0130841121495	0.0023768366465
FBgn0034783	0.0198555956679	0.00180505415162	0.00715071507151	0.00361010830325	0.0	0.00715071507151	0.0228640192539	0.001100110011	0.0023768366465
FBgn0034788	0.0198555956679	0.00180505415162	0.00715071507151	0.00361010830325	0.0	0.00715071507151	0.0228640192539	0.001100110011	0.0023768366465
FBgn0035267	0.0325814536341	0.015873015873	0.00630733944954	0.0392648287385	0.00286697247706	0.00974770642202	0.0651629072682	0.00172018348624	0.0023768366465
FBgn0036258	0.00282007896221	0.00112803158488	0.00630733944954	0.00338409475465	0.00286697247706	0.00974770642202	0.00507614213198	0.00172018348624	0.0023768366465
FBgn0036785	0.0325814536341	0.015873015873	0.00715071507151	0.0392648287385	0.0	0.00715071507151	0.0651629072682	0.001100110011	0.0023768366465
FBgn0036786	0.0325814536341	0.015873015873	0.0401869158879	0.0392648287385	0.0140186915888	0.0691588785047	0.0651629072682	0.0130841121495	0.0023768366465
FBgn0036787	0.0325814536341	0.015873015873	0.00715071507151	0.0392648287385	0.0	0.00715071507151	0.0651629072682	0.001100110011	0.0023768366465
FBgn0036781	0.0198555956679	0.00180505415162	0.00715071507151	0.00361010830325	0.0	0.00715071507151	0.0228640192539	0.001100110011	0.0023768366465
FBgn0036783	0.0198555956679	0.00180505415162	0.00715071507151	0.00361010830325	0.0	0.00715071507151	0.0228640192539	0.001100110011	0.0023768366465
FBgn0037906	0.0198555956679	0.00180505415162	0.00715071507151	0.00361010830325	0.0	0.00715071507151	0.0228640192539	0.001100110011	0.0023768366465
FBgn0014362	0.00282007896221	0.00112803158488	0.00630733944954	0.00338409475465	0.00286697247706	0.00974770642202	0.00507614213198	0.00172018348624	0.0023768366465
FBgn0034871	0.0198555956679	0.00180505415162	0.00715071507151	0.00361010830325	0.0	0.00715071507151	0.0228640192539	0.001100110011	0.0023768366465
FBgn0034878	0.00282007896221	0.00112803158488	0.00630733944954	0.00338409475465	0.00286697247706	0.00974770642202	0.00507614213198	0.00172018348624	0.0023768366465
FBgn0038366	0.0198555956679	0.00180505415162	0.0401869158879	0.00361010830325	0.0140186915888	0.0691588785047	0.0228640192539	0.0130841121495	0.0023768366465
FBgn0038360	0.00282007896221	0.00112803158488	0.00630733944954	0.00338409475465	0.00286697247706	0.00974770642202	0.00507614213198	0.00172018348624	0.0023768366465
FBgn0030170	0.0325814536341	0.015873015873	0.00630733944954	0.0392648287385	0.00286697247706	0.00974770642202	0.0651629072682	0.00172018348624	0.0023768366465
FBgn0002940	0.0198555956679	0.00180505415162	0.00715071507151	0.00361010830325	0.0	0.00715071507151	0.0228640192539	0.001100110011	0.0023768366465
FBgn0037781	0.0325814536341	0.015873015873	0.0401869158879	0.0392648287385	0.0140186915888	0.0691588785047	0.0651629072682	0.0130841121495	0.0023768366465
FBgn0037780	0.00282007896221	0.00112803158488	0.00630733944954	0.00338409475465	0.00286697247706	0.00974770642202	0.00507614213198	0.00172018348624	0.0023768366465
FBgn0036437	0.0198555956679	0.00180505415162	0.00715071507151	0.00361010830325	0.0	0.00715071507151	0.0228640192539	0.001100110011	0.0023768366465
FBgn0033154	0.0198555956679	0.00180505415162	0.00715071507151	0.00361010830325	0.0	0.00715071507151	0.0228640192539	0.001100110011	0.0023768366465
FBgn0033155	0.00282007896221	0.00112803158488	0.00630733944954	0.00338409475465	0.00286697247706	0.00974770642202	0.00507614213198	0.00172018348624	0.0023768366465
FBgn0036433	0.0325814536341	0.015873015873	0.0401869158879	0.0392648287385	0.0140186915888	0.0691588785047	0.0651629072682	0.0130841121495	0.0023768366465
FBgn0010313	0.00282007896221	0.00112803158488	0.00630733944954	0.00338409475465	0.00286697247706	0.00974770642202	0.00507614213198	0.00172018348624	0.0023768366465
FBgn0010238	0.0325814536341	0.015873015873	0.0401869158879	0.0392648287385	0.0140186915888	0.0691588785047	0.0651629072682	0.0130841121495	0.0023768366465
FBgn0015763	0.00282007896221	0.00112803158488	0.00630733944954	0.00338409475465	0.00286697247706	0.00974770642202	0.00507614213198	0.00172018348624	0.0023768366465
FBgn0015765	0.0325814536341	0.015873015873	0.0401869158879	0.0392648287385	0.0140186915888	0.0691588785047	0.0651629072682	0.0130841121495	0.0023768366465
FBgn0010316	0.00282007896221	0.00112803158488	0.00630733944954	0.00338409475465	0.00286697247706	0.00974770642202	0.00507614213198	0.00172018348624	0.0023768366465
FBgn0015766	0.0325814536341	0.015873015873	0.00715071507151	0.0392648287385	0.0	0.00715071507151	0.0651629072682	0.001100110011	0.0023768366465
FBgn0051867	0.0198555956679	0.00180505415162	0.00715071507151	0.00361010830325	0.0	0.00715071507151	0.0228640192539	0.001100110011	0.0023768366465
FBgn0010317	0.0198555956679	0.00180505415162	0.00715071507151	0.00361010830325	0.0	0.00715071507151	0.0228640192539	0.001100110011	0.0023768366465
FBgn0051869	0.0198555956679	0.00180505415162	0.00715071507151	0.00361010830325	0.0	0.00715071507151	0.0228640192539	0.001100110011	0.0023768366465
FBgn0035263	0.0198555956679	0.00180505415162	0.00715071507151	0.00361010830325	0.0	0.00715071507151	0.0228640192539	0.001100110011	0.0023768366465
FBgn0038512	0.0198555956679	0.00180505415162	0.00715071507151	0.00361010830325	0.0	0.00715071507151	0.0228640192539	0.001100110011	0.0023768366465
FBgn0033442	0.0198555956679	0.00180505415162	0.00715071507151	0.00361010830325	0.0	0.00715071507151	0.0228640192539	0.001100110011	0.0023768366465
FBgn0025378	0.0198555956679	0.00180505415162	0.00715071507151	0.00361010830325	0.0	0.00715071507151	0.0228640192539	0.001100110011	0.0023768366465
FBgn0032204	0.00282007896221	0.00112803158488	0.00630733944954	0.00338409475465	0.00286697247706	0.00974770642202	0.00507614213198	0.00172018348624	0.0023768366465
FBgn0032202	0.0325814536341	0.015873015873	0.0401869158879	0.0392648287385	0.0140186915888	0.0691588785047	0.0651629072682	0.0130841121495	0.0023768366465
FBgn0002566	0.00282007896221	0.00112803158488	0.00630733944954	0.00338409475465	0.00286697247706	0.00974770642202	0.00507614213198	0.00172018348624	0.0023768366465
FBgn0002564	0.0198555956679	0.00180505415162	0.00715071507151	0.00361010830325	0.0	0.00715071507151	0.0228640192539	0.001100110011	0.0023768366465
FBgn0002563	0.0198555956679	0.00180505415162	0.00715071507151	0.00361010830325	0.0	0.00715071507151	0.0228640192539	0.001100110011	0.0023768366465
FBgn0002561	0.0325814536341	0.015873015873	0.0401869158879	0.0392648287385	0.0140186915888	0.0691588785047	0.0651629072682	0.0130841121495	0.0023768366465
FBgn0028398	0.00282007896221	0.00112803158488	0.00630733944954	0.00338409475465	0.00286697247706	0.00974770642202	0.00507614213198	0.00172018348624	0.0023768366465
FBgn0024689	0.00282007896221	0.00112803158488	0.00630733944954	0.00338409475465	0.00286697247706	0.00974770642202	0.00507614213198	0.00172018348624	0.0023768366465
FBgn0052512	0.0198555956679	0.00180505415162	0.00715071507151	0.00361010830325	0.0	0.00715071507151	0.0228640192539	0.001100110011	0.0023768366465
FBgn0003383	0.0198555956679	0.00180505415162	0.00715071507151	0.00361010830325	0.0	0.00715071507151	0.0228640192539	0.001100110011	0.0023768366465
FBgn0003386	0.0325814536341	0.015873015873	0.00715071507151	0.0392648287385	0.0	0.00715071507151	0.0651629072682	0.001100110011	0.0023768366465
FBgn0004623	0.0325814536341	0.015873015873	0.0401869158879	0.0392648287385	0.0140186915888	0.0691588785047	0.0651629072682	0.0130841121495	0.0023768366465
FBgn0004620	0.0198555956679	0.00180505415162	0.00715071507151	0.00361010830325	0.0	0.00715071507151	0.0228640192539	0.001100110011	0.0023768366465
FBgn0024975	0.00282007896221	0.00112803158488	0.00630733944954	0.00338409475465	0.00286697247706	0.00974770642202	0.00507614213198	0.00172018348624	0.0023768366465
FBgn0035006	0.0198555956679	0.00180505415162	0.00715071507151	0.00361010830325	0.0	0.00715071507151	0.0228640192539	0.001100110011	0.0023768366465
FBgn0020269	0.0325814536341	0.015873015873	0.00715071507151	0.0392648287385	0.0	0.00715071507151	0.0651629072682	0.001100110011	0.0023768366465
FBgn0031781	0.00282007896221	0.00112803158488	0.00630733944954	0.00338409475465	0.00286697247706	0.00974770642202	0.00507614213198	0.00172018348624	0.0023768366465
FBgn0052076	0.0325814536341	0.015873015873	0.0401869158879	0.0392648287385	0.0140186915888	0.0691588785047	0.0651629072682	0.0130841121495	0.0023768366465
FBgn0034661	0.0198555956679	0.00180505415162	0.00715071507151	0.00361010830325	0.0	0.00715071507151	0.0228640192539	0.001100110011	0.0023768366465
FBgn0034663	0.0198555956679	0.00180505415162	0.00715071507151	0.00361010830325	0.0	0.00715071507151	0.0228640192539	0.001100110011	0.0023768366465
FBgn0031161	0.00282007896221	0.00112803158488	0.0401869158879	0.00338409475465	0.0140186915888	0.0691588785047	0.00507614213198	0.0130841121495	0.0023768366465
FBgn0038170	0.0325814536341	0.015873015873	0.00715071507151	0.0392648287385	0.0	0.00715071507151	0.0651629072682	0.001100110011	0.0023768366465
FBgn0038172	0.0198555956679	0.00180505415162	0.00715071507151	0.00361010830325	0.0	0.00715071507151	0.0228640192539	0.001100110011	0.0023768366465
FBgn0038175	0.0198555956679	0.00180505415162	0.00715071507151	0.00361010830325	0.0	0.00715071507151	0.0228640192539	0.001100110011	0.0023768366465
FBgn0038179	0.0198555956679	0.00180505415162	0.00715071507151	0.00361010830325	0.0	0.00715071507151	0.0228640192539	0.001100110011	0.0023768366465
FBgn0011692	0.00282007896221	0.00112803158488	0.00630733944954	0.00338409475465	0.00286697247706	0.00974770642202	0.00507614213198	0.00172018348624	0.0023768366465
FBgn0011695	0.0198555956679	0.00180505415162	0.0401869158879	0.00361010830325	0.0140186915888	0.0691588785047	0.0228640192539	0.0130841121495	0.0023768366465
FBgn0030294	0.00282007896221	0.00112803158488	0.00630733944954	0.00338409475465	0.00286697247706	0.00974770642202	0.00507614213198	0.00172018348624	0.0023768366465
FBgn0015591	0.0198555956679	0.00180505415162	0.00715071507151	0.00361010830325	0.0	0.00715071507151	0.0228640192539	0.001100110011	0.0023768366465
FBgn0051676	0.0198555956679	0.00180505415162	0.00715071507151	0.00361010830325	0.0	0.00715071507151	0.0228640192539	0.001100110011	0.0023768366465
FBgn0051675	0.0198555956679	0.00180505415162	0.00715071507151	0.00361010830325	0.0	0.00715071507151	0.0228640192539	0.001100110011	0.0023768366465
FBgn0051673	0.0198555956679	0.00180505415162	0.00715071507151	0.00361010830325	0.0	0.00715071507151	0.0228640192539	0.001100110011	0.0023768366465
FBgn0051216	0.0198555956679	0.00180505415162	0.00715071507151	0.00361010830325	0.0	0.00715071507151	0.0228640192539	0.001100110011	0.0023768366465
FBgn0039779	0.0198555956679	0.00180505415162	0.00715071507151	0.00361010830325	0.0	0.00715071507151	0.0228640192539	0.001100110011	0.0023768366465
FBgn0039774	0.0325814536341	0.015873015873	0.00715071507151	0.0392648287385	0.0	0.00715071507151	0.0651629072682	0.001100110011	0.0023768366465
FBgn0039776	0.0325814536341	0.015873015873	0.0401869158879	0.0392648287385	0.0140186915888	0.0691588785047	0.0651629072682	0.0130841121495	0.0023768366465
FBgn0039777	0.0198555956679	0.00180505415162	0.00715071507151	0.00361010830325	0.0	0.00715071507151	0.0228640192539	0.001100110011	0.0023768366465
FBgn0037310	0.0198555956679	0.00180505415162	0.00715071507151	0.00361010830325	0.0	0.00715071507151	0.0228640192539	0.001100110011	0.0023768366465
FBgn0037313	0.00282007896221	0.00112803158488	0.00630733944954	0.00338409475465	0.00286697247706	0.00974770642202	0.00507614213198	0.00172018348624	0.0023768366465
FBgn0037646	0.0325814536341	0.015873015873	0.0401869158879	0.0392648287385	0.0140186915888	0.0691588785047	0.0651629072682	0.0130841121495	0.0023768366465
FBgn0037315	0.0325814536341	0.015873015873	0.0401869158879	0.0392648287385	0.0140186915888	0.0691588785047	0.0651629072682	0.0130841121495	0.0023768366465
FBgn0037644	0.00282007896221	0.00112803158488	0.00630733944954	0.00338409475465	0.00286697247706	0.00974770642202	0.00507614213198	0.00172018348624	0.0023768366465
FBgn0037317	0.00282007896221	0.00112803158488	0.00630733944954	0.00338409475465	0.00286697247706	0.00974770642202	0.00507614213198	0.00172018348624	0.0023768366465
FBgn0031920	0.0198555956679	0.00180505415162	0.00715071507151	0.00361010830325	0.0	0.00715071507151	0.0228640192539	0.001100110011	0.0023768366465
FBgn0000157	0.0198555956679	0.00180505415162	0.0401869158879	0.00361010830325	0.0140186915888	0.0691588785047	0.0228640192539	0.0130841121495	0.0023768366465
FBgn0004430	0.0198555956679	0.00180505415162	0.0401869158879	0.00361010830325	0.0140186915888	0.0691588785047	0.0228640192539	0.0130841121495	0.0023768366465
FBgn0004926	0.00282007896221	0.00112803158488	0.00630733944954	0.00338409475465	0.00286697247706	0.00974770642202	0.00507614213198	0.00172018348624	0.0023768366465
FBgn0004381	0.00282007896221	0.00112803158488	0.00630733944954	0.00338409475465	0.00286697247706	0.00974770642202	0.00507614213198	0.00172018348624	0.0023768366465
FBgn0004657	0.00282007896221	0.00112803158488	0.00630733944954	0.00338409475465	0.00286697247706	0.00974770642202	0.00507614213198	0.00172018348624	0.0023768366465
FBgn0004656	0.00282007896221	0.00112803158488	0.00630733944954	0.00338409475465	0.00286697247706	0.00974770642202	0.00507614213198	0.00172018348624	0.0023768366465
FBgn0004650	0.0325814536341	0.015873015873	0.0401869158879	0.0392648287385	0.0140186915888	0.0691588785047	0.0651629072682	0.0130841121495	0.0023768366465
FBgn0033527	0.00282007896221	0.00112803158488	0.00630733944954	0.00338409475465	0.00286697247706	0.00974770642202	0.00507614213198	0.00172018348624	0.0023768366465
FBgn0033524	0.0198555956679	0.00180505415162	0.00715071507151	0.00361010830325	0.0	0.00715071507151	0.0228640192539	0.001100110011	0.0023768366465
FBgn0033523	0.0325814536341	0.015873015873	0.00630733944954	0.0392648287385	0.00286697247706	0.00974770642202	0.0651629072682	0.00172018348624	0.0023768366465
FBgn0013995	0.0198555956679	0.00180505415162	0.00715071507151	0.00361010830325	0.0	0.00715071507151	0.0228640192539	0.001100110011	0.0023768366465
FBgn0033528	0.00282007896221	0.00112803158488	0.00630733944954	0.00338409475465	0.00286697247706	0.00974770642202	0.00507614213198	0.00172018348624	0.0023768366465
FBgn0035257	0.0198555956679	0.00180505415162	0.00715071507151	0.00361010830325	0.0	0.00715071507151	0.0228640192539	0.001100110011	0.0023768366465
FBgn0035254	0.00282007896221	0.00112803158488	0.00630733944954	0.00338409475465	0.00286697247706	0.00974770642202	0.00507614213198	0.00172018348624	0.0023768366465
FBgn0035251	0.00282007896221	0.00112803158488	0.00630733944954	0.00338409475465	0.00286697247706	0.00974770642202	0.00507614213198	0.00172018348624	0.0023768366465
FBgn0039277	0.0325814536341	0.015873015873	0.00715071507151	0.0392648287385	0.0	0.00715071507151	0.0651629072682	0.001100110011	0.0023768366465
FBgn0028687	0.00282007896221	0.00112803158488	0.00630733944954	0.00338409475465	0.00286697247706	0.00974770642202	0.00507614213198	0.00172018348624	0.0023768366465
FBgn0028685	0.00282007896221	0.00112803158488	0.00630733944954	0.00338409475465	0.00286697247706	0.00974770642202	0.00507614213198	0.00172018348624	0.0023768366465
FBgn0028688	0.00282007896221	0.00112803158488	0.00630733944954	0.00338409475465	0.00286697247706	0.00974770642202	0.00507614213198	0.00172018348624	0.0023768366465
FBgn0037517	0.0198555956679	0.00180505415162	0.00715071507151	0.00361010830325	0.0	0.00715071507151	0.0228640192539	0.001100110011	0.0023768366465
FBgn0039969	0.0325814536341	0.015873015873	0.0401869158879	0.0392648287385	0.0140186915888	0.0691588785047	0.0651629072682	0.0130841121495	0.0023768366465
FBgn0038993	0.0198555956679	0.00180505415162	0.00715071507151	0.00361010830325	0.0	0.00715071507151	0.0228640192539	0.001100110011	0.0023768366465
FBgn0002715	0.00282007896221	0.00112803158488	0.00630733944954	0.00338409475465	0.00286697247706	0.00974770642202	0.00507614213198	0.00172018348624	0.0023768366465
FBgn0052666	0.00282007896221	0.00112803158488	0.00630733944954	0.00338409475465	0.00286697247706	0.00974770642202	0.00507614213198	0.00172018348624	0.0023768366465
FBgn0031716	0.0325814536341	0.015873015873	0.00715071507151	0.0392648287385	0.0	0.00715071507151	0.0651629072682	0.001100110011	0.0023768366465
FBgn0031717	0.0325814536341	0.015873015873	0.0401869158879	0.0392648287385	0.0140186915888	0.0691588785047	0.0651629072682	0.0130841121495	0.0023768366465
FBgn0033308	0.0198555956679	0.00180505415162	0.00715071507151	0.00361010830325	0.0	0.00715071507151	0.0228640192539	0.001100110011	0.0023768366465
FBgn0036173	0.00282007896221	0.00112803158488	0.00630733944954	0.00338409475465	0.00286697247706	0.00974770642202	0.00507614213198	0.00172018348624	0.0023768366465
FBgn0035520	0.00282007896221	0.00112803158488	0.00630733944954	0.00338409475465	0.00286697247706	0.00974770642202	0.00507614213198	0.00172018348624	0.0023768366465
FBgn0003449	0.00282007896221	0.00112803158488	0.00630733944954	0.00338409475465	0.00286697247706	0.00974770642202	0.00507614213198	0.00172018348624	0.0023768366465
FBgn0003448	0.0325814536341	0.015873015873	0.0401869158879	0.0392648287385	0.0140186915888	0.0691588785047	0.0651629072682	0.0130841121495	0.0023768366465
FBgn0003444	0.00282007896221	0.00112803158488	0.00630733944954	0.00338409475465	0.00286697247706	0.00974770642202	0.00507614213198	0.00172018348624	0.0023768366465
FBgn0039165	0.0325814536341	0.015873015873	0.0401869158879	0.0392648287385	0.0140186915888	0.0691588785047	0.0651629072682	0.0130841121495	0.0023768366465
FBgn0039167	0.0325814536341	0.015873015873	0.0401869158879	0.0392648287385	0.0140186915888	0.0691588785047	0.0651629072682	0.0130841121495	0.0023768366465
FBgn0031319	0.00282007896221	0.00112803158488	0.00630733944954	0.00338409475465	0.00286697247706	0.00974770642202	0.00507614213198	0.00172018348624	0.0023768366465
FBgn0039161	0.0198555956679	0.00180505415162	0.00715071507151	0.00361010830325	0.0	0.00715071507151	0.0228640192539	0.001100110011	0.0023768366465
FBgn0039160	0.00282007896221	0.00112803158488	0.00630733944954	0.00338409475465	0.00286697247706	0.00974770642202	0.00507614213198	0.00172018348624	0.0023768366465
FBgn0031313	0.0325814536341	0.015873015873	0.0401869158879	0.0392648287385	0.0140186915888	0.0691588785047	0.0651629072682	0.0130841121495	0.0023768366465
FBgn0031310	0.00282007896221	0.00112803158488	0.00630733944954	0.00338409475465	0.00286697247706	0.00974770642202	0.00507614213198	0.00172018348624	0.0023768366465
FBgn0031317	0.00282007896221	0.00112803158488	0.00630733944954	0.00338409475465	0.00286697247706	0.00974770642202	0.00507614213198	0.00172018348624	0.0023768366465
FBgn0031314	0.00282007896221	0.00112803158488	0.00630733944954	0.00338409475465	0.00286697247706	0.00974770642202	0.00507614213198	0.00172018348624	0.0023768366465
FBgn0031315	0.00282007896221	0.00112803158488	0.0401869158879	0.00338409475465	0.0140186915888	0.0691588785047	0.00507614213198	0.0130841121495	0.0023768366465
FBgn0000382	0.00282007896221	0.00112803158488	0.00630733944954	0.00338409475465	0.00286697247706	0.00974770642202	0.00507614213198	0.00172018348624	0.0023768366465
FBgn0032371	0.0198555956679	0.00180505415162	0.00715071507151	0.00361010830325	0.0	0.00715071507151	0.0228640192539	0.001100110011	0.0023768366465
FBgn0000251	0.0325814536341	0.015873015873	0.0401869158879	0.0392648287385	0.0140186915888	0.0691588785047	0.0651629072682	0.0130841121495	0.0023768366465
FBgn0035526	0.00282007896221	0.00112803158488	0.00630733944954	0.00338409475465	0.00286697247706	0.00974770642202	0.00507614213198	0.00172018348624	0.0023768366465
FBgn0051693	0.0198555956679	0.00180505415162	0.00715071507151	0.00361010830325	0.0	0.00715071507151	0.0228640192539	0.001100110011	0.0023768366465
FBgn0038694	0.0198555956679	0.00180505415162	0.00715071507151	0.00361010830325	0.0	0.00715071507151	0.0228640192539	0.001100110011	0.0023768366465
FBgn0038697	0.0198555956679	0.00180505415162	0.00715071507151	0.00361010830325	0.0	0.00715071507151	0.0228640192539	0.001100110011	0.0023768366465
FBgn0038690	0.0198555956679	0.00180505415162	0.0401869158879	0.00361010830325	0.0140186915888	0.0691588785047	0.0228640192539	0.0130841121495	0.0023768366465
FBgn0038691	0.00282007896221	0.00112803158488	0.00630733944954	0.00338409475465	0.00286697247706	0.00974770642202	0.00507614213198	0.00172018348624	0.0023768366465
FBgn0037419	0.0198555956679	0.00180505415162	0.00715071507151	0.00361010830325	0.0	0.00715071507151	0.0228640192539	0.001100110011	0.0023768366465
FBgn0030376	0.0198555956679	0.00180505415162	0.00715071507151	0.00361010830325	0.0	0.00715071507151	0.0228640192539	0.001100110011	0.0023768366465
FBgn0030373	0.0198555956679	0.00180505415162	0.00715071507151	0.00361010830325	0.0	0.00715071507151	0.0228640192539	0.001100110011	0.0023768366465
FBgn0037412	0.0198555956679	0.00180505415162	0.00715071507151	0.00361010830325	0.0	0.00715071507151	0.0228640192539	0.001100110011	0.0023768366465
FBgn0037411	0.0198555956679	0.00180505415162	0.00715071507151	0.00361010830325	0.0	0.00715071507151	0.0228640192539	0.001100110011	0.0023768366465
FBgn0030370	0.0198555956679	0.00180505415162	0.00715071507151	0.00361010830325	0.0	0.00715071507151	0.0228640192539	0.001100110011	0.0023768366465
FBgn0036239	0.00282007896221	0.00112803158488	0.00630733944954	0.00338409475465	0.00286697247706	0.00974770642202	0.00507614213198	0.00172018348624	0.0023768366465
FBgn0034509	0.0198555956679	0.00180505415162	0.00715071507151	0.00361010830325	0.0	0.00715071507151	0.0228640192539	0.001100110011	0.0023768366465
FBgn0015271	0.00282007896221	0.00112803158488	0.00630733944954	0.00338409475465	0.00286697247706	0.00974770642202	0.00507614213198	0.00172018348624	0.0023768366465
FBgn0034858	0.00282007896221	0.00112803158488	0.00630733944954	0.00338409475465	0.00286697247706	0.00974770642202	0.00507614213198	0.00172018348624	0.0023768366465
FBgn0034859	0.0325814536341	0.015873015873	0.0401869158879	0.0392648287385	0.0140186915888	0.0691588785047	0.0651629072682	0.0130841121495	0.0023768366465
FBgn0034501	0.0325814536341	0.015873015873	0.0401869158879	0.0392648287385	0.0140186915888	0.0691588785047	0.0651629072682	0.0130841121495	0.0023768366465
FBgn0034503	0.00282007896221	0.00112803158488	0.00630733944954	0.00338409475465	0.00286697247706	0.00974770642202	0.00507614213198	0.00172018348624	0.0023768366465
FBgn0034504	0.00282007896221	0.00112803158488	0.00630733944954	0.00338409475465	0.00286697247706	0.00974770642202	0.00507614213198	0.00172018348624	0.0023768366465
FBgn0034506	0.0198555956679	0.00180505415162	0.00715071507151	0.00361010830325	0.0	0.00715071507151	0.0228640192539	0.001100110011	0.0023768366465
FBgn0038347	0.0198555956679	0.00180505415162	0.00715071507151	0.00361010830325	0.0	0.00715071507151	0.0228640192539	0.001100110011	0.0023768366465
FBgn0038344	0.00282007896221	0.00112803158488	0.00630733944954	0.00338409475465	0.00286697247706	0.00974770642202	0.00507614213198	0.00172018348624	0.0023768366465
FBgn0038345	0.0198555956679	0.00180505415162	0.00715071507151	0.00361010830325	0.0	0.00715071507151	0.0228640192539	0.001100110011	0.0023768366465
FBgn0038341	0.0325814536341	0.015873015873	0.0401869158879	0.0392648287385	0.0140186915888	0.0691588785047	0.0651629072682	0.0130841121495	0.0023768366465
FBgn0030191	0.0325814536341	0.015873015873	0.00715071507151	0.0392648287385	0.0	0.00715071507151	0.0651629072682	0.001100110011	0.0023768366465
FBgn0030196	0.00282007896221	0.00112803158488	0.00630733944954	0.00338409475465	0.00286697247706	0.00974770642202	0.00507614213198	0.00172018348624	0.0023768366465
FBgn0036875	0.0198555956679	0.00180505415162	0.00715071507151	0.00361010830325	0.0	0.00715071507151	0.0228640192539	0.001100110011	0.0023768366465
FBgn0036391	0.0198555956679	0.00180505415162	0.00715071507151	0.00361010830325	0.0	0.00715071507151	0.0228640192539	0.001100110011	0.0023768366465
FBgn0040582	0.0198555956679	0.00180505415162	0.00715071507151	0.00361010830325	0.0	0.00715071507151	0.0228640192539	0.001100110011	0.0023768366465
FBgn0015781	0.0325814536341	0.015873015873	0.0401869158879	0.0392648287385	0.0140186915888	0.0691588785047	0.0651629072682	0.0130841121495	0.0023768366465
FBgn0032817	0.0325814536341	0.015873015873	0.0401869158879	0.0392648287385	0.0140186915888	0.0691588785047	0.0651629072682	0.0130841121495	0.0023768366465
FBgn0015789	0.00282007896221	0.00112803158488	0.00630733944954	0.00338409475465	0.00286697247706	0.00974770642202	0.00507614213198	0.00172018348624	0.0023768366465
FBgn0010333	0.00282007896221	0.00112803158488	0.00630733944954	0.00338409475465	0.00286697247706	0.00974770642202	0.00507614213198	0.00172018348624	0.0023768366465
FBgn0030999	0.0198555956679	0.00180505415162	0.00715071507151	0.00361010830325	0.0	0.00715071507151	0.0228640192539	0.001100110011	0.0023768366465
FBgn0051802	0.0198555956679	0.00180505415162	0.00715071507151	0.00361010830325	0.0	0.00715071507151	0.0228640192539	0.001100110011	0.0023768366465
FBgn0030993	0.0198555956679	0.00180505415162	0.00715071507151	0.00361010830325	0.0	0.00715071507151	0.0228640192539	0.001100110011	0.0023768366465
FBgn0030992	0.0325814536341	0.015873015873	0.0401869158879	0.0392648287385	0.0140186915888	0.0691588785047	0.0651629072682	0.0130841121495	0.0023768366465
FBgn0030990	0.00282007896221	0.00112803158488	0.00630733944954	0.00338409475465	0.00286697247706	0.00974770642202	0.00507614213198	0.00172018348624	0.0023768366465
FBgn0030996	0.00282007896221	0.00112803158488	0.00630733944954	0.00338409475465	0.00286697247706	0.00974770642202	0.00507614213198	0.00172018348624	0.0023768366465
FBgn0030994	0.0198555956679	0.00180505415162	0.00715071507151	0.00361010830325	0.0	0.00715071507151	0.0228640192539	0.001100110011	0.0023768366465
FBgn0004054	0.0325814536341	0.015873015873	0.00715071507151	0.0392648287385	0.0	0.00715071507151	0.0651629072682	0.001100110011	0.0023768366465
FBgn0032042	0.00282007896221	0.00112803158488	0.00630733944954	0.00338409475465	0.00286697247706	0.00974770642202	0.00507614213198	0.00172018348624	0.0023768366465
FBgn0032047	0.0325814536341	0.015873015873	0.0401869158879	0.0392648287385	0.0140186915888	0.0691588785047	0.0651629072682	0.0130841121495	0.0023768366465
FBgn0032048	0.0198555956679	0.00180505415162	0.00715071507151	0.00361010830325	0.0	0.00715071507151	0.0228640192539	0.001100110011	0.0023768366465
FBgn0041180	0.0325814536341	0.015873015873	0.0401869158879	0.0392648287385	0.0140186915888	0.0691588785047	0.0651629072682	0.0130841121495	0.0023768366465
FBgn0041181	0.0198555956679	0.00180505415162	0.00715071507151	0.00361010830325	0.0	0.00715071507151	0.0228640192539	0.001100110011	0.0023768366465
FBgn0041182	0.0325814536341	0.015873015873	0.00715071507151	0.0392648287385	0.0	0.00715071507151	0.0651629072682	0.001100110011	0.0023768366465
FBgn0045823	0.00282007896221	0.00112803158488	0.00630733944954	0.00338409475465	0.00286697247706	0.00974770642202	0.00507614213198	0.00172018348624	0.0023768366465
FBgn0028903	0.0198555956679	0.00180505415162	0.00715071507151	0.00361010830325	0.0	0.00715071507151	0.0228640192539	0.001100110011	0.0023768366465
FBgn0010622	0.00282007896221	0.00112803158488	0.00630733944954	0.00338409475465	0.00286697247706	0.00974770642202	0.00507614213198	0.00172018348624	0.0023768366465
FBgn0053099	0.0325814536341	0.015873015873	0.0401869158879	0.0392648287385	0.0140186915888	0.0691588785047	0.0651629072682	0.0130841121495	0.0023768366465
FBgn0032599	0.00282007896221	0.00112803158488	0.00630733944954	0.00338409475465	0.00286697247706	0.00974770642202	0.00507614213198	0.00172018348624	0.0023768366465
FBgn0032598	0.0198555956679	0.00180505415162	0.0401869158879	0.00361010830325	0.0140186915888	0.0691588785047	0.0228640192539	0.0130841121495	0.0023768366465
FBgn0034588	0.0198555956679	0.00180505415162	0.0401869158879	0.00361010830325	0.0140186915888	0.0691588785047	0.0228640192539	0.0130841121495	0.0023768366465
FBgn0003145	0.0198555956679	0.00180505415162	0.0401869158879	0.00361010830325	0.0140186915888	0.0691588785047	0.0228640192539	0.0130841121495	0.0023768366465
FBgn0003140	0.0198555956679	0.00180505415162	0.00715071507151	0.00361010830325	0.0	0.00715071507151	0.0228640192539	0.001100110011	0.0023768366465
FBgn0053278	0.0198555956679	0.00180505415162	0.00715071507151	0.00361010830325	0.0	0.00715071507151	0.0228640192539	0.001100110011	0.0023768366465
FBgn0051961	0.00282007896221	0.00112803158488	0.0401869158879	0.00338409475465	0.0140186915888	0.0691588785047	0.00507614213198	0.0130841121495	0.0023768366465
FBgn0011710	0.00282007896221	0.00112803158488	0.00630733944954	0.00338409475465	0.00286697247706	0.00974770642202	0.00507614213198	0.00172018348624	0.0023768366465
FBgn0015277	0.00282007896221	0.00112803158488	0.00630733944954	0.00338409475465	0.00286697247706	0.00974770642202	0.00507614213198	0.00172018348624	0.0023768366465
FBgn0022338	0.0325814536341	0.015873015873	0.00630733944954	0.0392648287385	0.00286697247706	0.00974770642202	0.0651629072682	0.00172018348624	0.0023768366465
FBgn0026718	0.0325814536341	0.015873015873	0.0401869158879	0.0392648287385	0.0140186915888	0.0691588785047	0.0651629072682	0.0130841121495	0.0023768366465
FBgn0022359	0.0198555956679	0.00180505415162	0.00715071507151	0.00361010830325	0.0	0.00715071507151	0.0228640192539	0.001100110011	0.0023768366465
FBgn0024958	0.00282007896221	0.00112803158488	0.00630733944954	0.00338409475465	0.00286697247706	0.00974770642202	0.00507614213198	0.00172018348624	0.0023768366465
FBgn0024956	0.00282007896221	0.00112803158488	0.00630733944954	0.00338409475465	0.00286697247706	0.00974770642202	0.00507614213198	0.00172018348624	0.0023768366465
FBgn0035064	0.00282007896221	0.00112803158488	0.00630733944954	0.00338409475465	0.00286697247706	0.00974770642202	0.00507614213198	0.00172018348624	0.0023768366465
FBgn0035065	0.00282007896221	0.00112803158488	0.00630733944954	0.00338409475465	0.00286697247706	0.00974770642202	0.00507614213198	0.00172018348624	0.0023768366465
FBgn0035069	0.0198555956679	0.00180505415162	0.00715071507151	0.00361010830325	0.0	0.00715071507151	0.0228640192539	0.001100110011	0.0023768366465
FBgn0031762	0.0325814536341	0.015873015873	0.0401869158879	0.0392648287385	0.0140186915888	0.0691588785047	0.0651629072682	0.0130841121495	0.0023768366465
FBgn0031813	0.0325814536341	0.015873015873	0.0401869158879	0.0392648287385	0.0140186915888	0.0691588785047	0.0651629072682	0.0130841121495	0.0023768366465
FBgn0031760	0.00282007896221	0.00112803158488	0.00630733944954	0.00338409475465	0.00286697247706	0.00974770642202	0.00507614213198	0.00172018348624	0.0023768366465
FBgn0031818	0.00282007896221	0.00112803158488	0.00630733944954	0.00338409475465	0.00286697247706	0.00974770642202	0.00507614213198	0.00172018348624	0.0023768366465
FBgn0031769	0.00282007896221	0.00112803158488	0.00630733944954	0.00338409475465	0.00286697247706	0.00974770642202	0.00507614213198	0.00172018348624	0.0023768366465
FBgn0052053	0.0325814536341	0.015873015873	0.0401869158879	0.0392648287385	0.0140186915888	0.0691588785047	0.0651629072682	0.0130841121495	0.0023768366465
FBgn0052056	0.00282007896221	0.00112803158488	0.00630733944954	0.00338409475465	0.00286697247706	0.00974770642202	0.00507614213198	0.00172018348624	0.0023768366465
FBgn0052057	0.0198555956679	0.00180505415162	0.00715071507151	0.00361010830325	0.0	0.00715071507151	0.0228640192539	0.001100110011	0.0023768366465
FBgn0028893	0.0198555956679	0.00180505415162	0.00715071507151	0.00361010830325	0.0	0.00715071507151	0.0228640192539	0.001100110011	0.0023768366465
FBgn0028897	0.0325814536341	0.015873015873	0.00630733944954	0.0392648287385	0.00286697247706	0.00974770642202	0.0651629072682	0.00172018348624	0.0023768366465
FBgn0028896	0.0198555956679	0.00180505415162	0.00715071507151	0.00361010830325	0.0	0.00715071507151	0.0228640192539	0.001100110011	0.0023768366465
FBgn0000500	0.0198555956679	0.00180505415162	0.00715071507151	0.00361010830325	0.0	0.00715071507151	0.0228640192539	0.001100110011	0.0023768366465
FBgn0031103	0.0198555956679	0.00180505415162	0.00715071507151	0.00361010830325	0.0	0.00715071507151	0.0228640192539	0.001100110011	0.0023768366465
FBgn0026149	0.00282007896221	0.00112803158488	0.00630733944954	0.00338409475465	0.00286697247706	0.00974770642202	0.00507614213198	0.00172018348624	0.0023768366465
FBgn0026148	0.0325814536341	0.015873015873	0.0401869158879	0.0392648287385	0.0140186915888	0.0691588785047	0.0651629072682	0.0130841121495	0.0023768366465
FBgn0051122	0.00282007896221	0.00112803158488	0.00630733944954	0.00338409475465	0.00286697247706	0.00974770642202	0.00507614213198	0.00172018348624	0.0023768366465
FBgn0051121	0.0325814536341	0.015873015873	0.0401869158879	0.0392648287385	0.0140186915888	0.0691588785047	0.0651629072682	0.0130841121495	0.0023768366465
FBgn0051120	0.00282007896221	0.00112803158488	0.00630733944954	0.00338409475465	0.00286697247706	0.00974770642202	0.00507614213198	0.00172018348624	0.0023768366465
FBgn0051125	0.00282007896221	0.00112803158488	0.00630733944954	0.00338409475465	0.00286697247706	0.00974770642202	0.00507614213198	0.00172018348624	0.0023768366465
FBgn0035003	0.0198555956679	0.00180505415162	0.00715071507151	0.00361010830325	0.0	0.00715071507151	0.0228640192539	0.001100110011	0.0023768366465
FBgn0051128	0.0198555956679	0.00180505415162	0.00715071507151	0.00361010830325	0.0	0.00715071507151	0.0228640192539	0.001100110011	0.0023768366465
FBgn0038567	0.0325814536341	0.015873015873	0.00715071507151	0.0392648287385	0.0	0.00715071507151	0.0651629072682	0.001100110011	0.0023768366465
FBgn0038564	0.00282007896221	0.00112803158488	0.00630733944954	0.00338409475465	0.00286697247706	0.00974770642202	0.00507614213198	0.00172018348624	0.0023768366465
FBgn0024973	0.00282007896221	0.00112803158488	0.00630733944954	0.00338409475465	0.00286697247706	0.00974770642202	0.00507614213198	0.00172018348624	0.0023768366465
FBgn0039756	0.0325814536341	0.015873015873	0.0401869158879	0.0392648287385	0.0140186915888	0.0691588785047	0.0651629072682	0.0130841121495	0.0023768366465
FBgn0039757	0.00282007896221	0.00112803158488	0.00630733944954	0.00338409475465	0.00286697247706	0.00974770642202	0.00507614213198	0.00172018348624	0.0023768366465
FBgn0039754	0.0198555956679	0.00180505415162	0.00715071507151	0.00361010830325	0.0	0.00715071507151	0.0228640192539	0.001100110011	0.0023768366465
FBgn0039759	0.0198555956679	0.00180505415162	0.00715071507151	0.00361010830325	0.0	0.00715071507151	0.0228640192539	0.001100110011	0.0023768366465
FBgn0037338	0.0325814536341	0.015873015873	0.0401869158879	0.0392648287385	0.0140186915888	0.0691588785047	0.0651629072682	0.0130841121495	0.0023768366465
FBgn0037339	0.00282007896221	0.00112803158488	0.00630733944954	0.00338409475465	0.00286697247706	0.00974770642202	0.00507614213198	0.00172018348624	0.0023768366465
FBgn0037332	0.00282007896221	0.00112803158488	0.00630733944954	0.00338409475465	0.00286697247706	0.00974770642202	0.00507614213198	0.00172018348624	0.0023768366465
FBgn0037330	0.00282007896221	0.00112803158488	0.00630733944954	0.00338409475465	0.00286697247706	0.00974770642202	0.00507614213198	0.00172018348624	0.0023768366465
FBgn0037627	0.0198555956679	0.00180505415162	0.00715071507151	0.00361010830325	0.0	0.00715071507151	0.0228640192539	0.001100110011	0.0023768366465
FBgn0037621	0.00282007896221	0.00112803158488	0.00630733944954	0.00338409475465	0.00286697247706	0.00974770642202	0.00507614213198	0.00172018348624	0.0023768366465
FBgn0000171	0.0325814536341	0.015873015873	0.0401869158879	0.0392648287385	0.0140186915888	0.0691588785047	0.0651629072682	0.0130841121495	0.0023768366465
FBgn0001170	0.0325814536341	0.015873015873	0.0401869158879	0.0392648287385	0.0140186915888	0.0691588785047	0.0651629072682	0.0130841121495	0.0023768366465
FBgn0050290	0.00282007896221	0.00112803158488	0.00630733944954	0.00338409475465	0.00286697247706	0.00974770642202	0.00507614213198	0.00172018348624	0.0023768366465
FBgn0050291	0.00282007896221	0.00112803158488	0.00630733944954	0.00338409475465	0.00286697247706	0.00974770642202	0.00507614213198	0.00172018348624	0.0023768366465
FBgn0050295	0.0325814536341	0.015873015873	0.0401869158879	0.0392648287385	0.0140186915888	0.0691588785047	0.0651629072682	0.0130841121495	0.0023768366465
FBgn0028408	0.0325814536341	0.015873015873	0.0401869158879	0.0392648287385	0.0140186915888	0.0691588785047	0.0651629072682	0.0130841121495	0.0023768366465
FBgn0030913	0.0198555956679	0.00180505415162	0.00715071507151	0.00361010830325	0.0	0.00715071507151	0.0228640192539	0.001100110011	0.0023768366465
FBgn0003997	0.0325814536341	0.015873015873	0.0401869158879	0.0392648287385	0.0140186915888	0.0691588785047	0.0651629072682	0.0130841121495	0.0023768366465
FBgn0027360	0.00282007896221	0.00112803158488	0.00630733944954	0.00338409475465	0.00286697247706	0.00974770642202	0.00507614213198	0.00172018348624	0.0023768366465
FBgn0027363	0.00282007896221	0.00112803158488	0.00630733944954	0.00338409475465	0.00286697247706	0.00974770642202	0.00507614213198	0.00172018348624	0.0023768366465
FBgn0030915	0.00282007896221	0.00112803158488	0.00630733944954	0.00338409475465	0.00286697247706	0.00974770642202	0.00507614213198	0.00172018348624	0.0023768366465
FBgn0033501	0.0198555956679	0.00180505415162	0.00715071507151	0.00361010830325	0.0	0.00715071507151	0.0228640192539	0.001100110011	0.0023768366465
FBgn0033051	0.0198555956679	0.00180505415162	0.00715071507151	0.00361010830325	0.0	0.00715071507151	0.0228640192539	0.001100110011	0.0023768366465
FBgn0033050	0.00282007896221	0.00112803158488	0.00630733944954	0.00338409475465	0.00286697247706	0.00974770642202	0.00507614213198	0.00172018348624	0.0023768366465
FBgn0033054	0.0198555956679	0.00180505415162	0.00715071507151	0.00361010830325	0.0	0.00715071507151	0.0228640192539	0.001100110011	0.0023768366465
FBgn0037238	0.0198555956679	0.00180505415162	0.0401869158879	0.00361010830325	0.0140186915888	0.0691588785047	0.0228640192539	0.0130841121495	0.0023768366465
FBgn0032906	0.0325814536341	0.015873015873	0.00630733944954	0.0392648287385	0.00286697247706	0.00974770642202	0.0651629072682	0.00172018348624	0.0023768366465
FBgn0032907	0.0325814536341	0.015873015873	0.0401869158879	0.0392648287385	0.0140186915888	0.0691588785047	0.0651629072682	0.0130841121495	0.0023768366465
FBgn0032901	0.00282007896221	0.00112803158488	0.00630733944954	0.00338409475465	0.00286697247706	0.00974770642202	0.00507614213198	0.00172018348624	0.0023768366465
FBgn0035270	0.00282007896221	0.00112803158488	0.00630733944954	0.00338409475465	0.00286697247706	0.00974770642202	0.00507614213198	0.00172018348624	0.0023768366465
FBgn0035907	0.0325814536341	0.015873015873	0.0401869158879	0.0392648287385	0.0140186915888	0.0691588785047	0.0651629072682	0.0130841121495	0.0023768366465
FBgn0035906	0.0325814536341	0.015873015873	0.0401869158879	0.0392648287385	0.0140186915888	0.0691588785047	0.0651629072682	0.0130841121495	0.0023768366465
FBgn0035276	0.00282007896221	0.00112803158488	0.00630733944954	0.00338409475465	0.00286697247706	0.00974770642202	0.00507614213198	0.00172018348624	0.0023768366465
FBgn0031786	0.0198555956679	0.00180505415162	0.00715071507151	0.00361010830325	0.0	0.00715071507151	0.0228640192539	0.001100110011	0.0023768366465
FBgn0021750	0.0325814536341	0.015873015873	0.0401869158879	0.0392648287385	0.0140186915888	0.0691588785047	0.0651629072682	0.0130841121495	0.0023768366465
FBgn0030900	0.0325814536341	0.015873015873	0.0401869158879	0.0392648287385	0.0140186915888	0.0691588785047	0.0651629072682	0.0130841121495	0.0023768366465
FBgn0002736	0.00282007896221	0.00112803158488	0.00630733944954	0.00338409475465	0.00286697247706	0.00974770642202	0.00507614213198	0.00172018348624	0.0023768366465
FBgn0002733	0.0325814536341	0.015873015873	0.0401869158879	0.0392648287385	0.0140186915888	0.0691588785047	0.0651629072682	0.0130841121495	0.0023768366465
FBgn0052601	0.0198555956679	0.00180505415162	0.00715071507151	0.00361010830325	0.0	0.00715071507151	0.0228640192539	0.001100110011	0.0023768366465
FBgn0019886	0.00282007896221	0.00112803158488	0.00630733944954	0.00338409475465	0.00286697247706	0.00974770642202	0.00507614213198	0.00172018348624	0.0023768366465
FBgn0032358	0.00282007896221	0.00112803158488	0.00630733944954	0.00338409475465	0.00286697247706	0.00974770642202	0.00507614213198	0.00172018348624	0.0023768366465
FBgn0032671	0.00282007896221	0.00112803158488	0.00630733944954	0.00338409475465	0.00286697247706	0.00974770642202	0.00507614213198	0.00172018348624	0.0023768366465
FBgn0032673	0.0325814536341	0.015873015873	0.00715071507151	0.0392648287385	0.0	0.00715071507151	0.0651629072682	0.001100110011	0.0023768366465
FBgn0033933	0.0198555956679	0.00180505415162	0.00715071507151	0.00361010830325	0.0	0.00715071507151	0.0228640192539	0.001100110011	0.0023768366465
FBgn0033935	0.00282007896221	0.00112803158488	0.00630733944954	0.00338409475465	0.00286697247706	0.00974770642202	0.00507614213198	0.00172018348624	0.0023768366465
FBgn0003285	0.0325814536341	0.015873015873	0.0401869158879	0.0392648287385	0.0140186915888	0.0691588785047	0.0651629072682	0.0130841121495	0.0023768366465
FBgn0001248	0.0325814536341	0.015873015873	0.0401869158879	0.0392648287385	0.0140186915888	0.0691588785047	0.0651629072682	0.0130841121495	0.0023768366465
FBgn0000411	0.0325814536341	0.015873015873	0.0401869158879	0.0392648287385	0.0140186915888	0.0691588785047	0.0651629072682	0.0130841121495	0.0023768366465
FBgn0039109	0.0325814536341	0.015873015873	0.00715071507151	0.0392648287385	0.0	0.00715071507151	0.0651629072682	0.001100110011	0.0023768366465
FBgn0039107	0.0198555956679	0.00180505415162	0.00715071507151	0.00361010830325	0.0	0.00715071507151	0.0228640192539	0.001100110011	0.0023768366465
FBgn0003464	0.00282007896221	0.00112803158488	0.00630733944954	0.00338409475465	0.00286697247706	0.00974770642202	0.00507614213198	0.00172018348624	0.0023768366465
FBgn0039104	0.0198555956679	0.00180505415162	0.00715071507151	0.00361010830325	0.0	0.00715071507151	0.0228640192539	0.001100110011	0.0023768366465
FBgn0039102	0.0325814536341	0.015873015873	0.0401869158879	0.0392648287385	0.0140186915888	0.0691588785047	0.0651629072682	0.0130841121495	0.0023768366465
FBgn0003463	0.0325814536341	0.015873015873	0.0401869158879	0.0392648287385	0.0140186915888	0.0691588785047	0.0651629072682	0.0130841121495	0.0023768366465
FBgn0003462	0.0325814536341	0.015873015873	0.0401869158879	0.0392648287385	0.0140186915888	0.0691588785047	0.0651629072682	0.0130841121495	0.0023768366465
FBgn0053519	0.0198555956679	0.00180505415162	0.00715071507151	0.00361010830325	0.0	0.00715071507151	0.0228640192539	0.001100110011	0.0023768366465
FBgn0031374	0.00282007896221	0.00112803158488	0.00630733944954	0.00338409475465	0.00286697247706	0.00974770642202	0.00507614213198	0.00172018348624	0.0023768366465
FBgn0053514	0.0325814536341	0.015873015873	0.0401869158879	0.0392648287385	0.0140186915888	0.0691588785047	0.0651629072682	0.0130841121495	0.0023768366465
FBgn0031372	0.0198555956679	0.00180505415162	0.00715071507151	0.00361010830325	0.0	0.00715071507151	0.0228640192539	0.001100110011	0.0023768366465
FBgn0017549	0.00282007896221	0.00112803158488	0.00630733944954	0.00338409475465	0.00286697247706	0.00974770642202	0.00507614213198	0.00172018348624	0.0023768366465
FBgn0038194	0.0325814536341	0.015873015873	0.00715071507151	0.0392648287385	0.0	0.00715071507151	0.0651629072682	0.001100110011	0.0023768366465
FBgn0017545	0.00282007896221	0.00112803158488	0.00630733944954	0.00338409475465	0.00286697247706	0.00974770642202	0.00507614213198	0.00172018348624	0.0023768366465
FBgn0013433	0.0325814536341	0.015873015873	0.00715071507151	0.0392648287385	0.0	0.00715071507151	0.0651629072682	0.001100110011	0.0023768366465
FBgn0016762	0.0325814536341	0.015873015873	0.00630733944954	0.0392648287385	0.00286697247706	0.00974770642202	0.0651629072682	0.00172018348624	0.0023768366465
FBgn0011260	0.00282007896221	0.00112803158488	0.00630733944954	0.00338409475465	0.00286697247706	0.00974770642202	0.00507614213198	0.00172018348624	0.0023768366465
FBgn0036500	0.00282007896221	0.00112803158488	0.00630733944954	0.00338409475465	0.00286697247706	0.00974770642202	0.00507614213198	0.00172018348624	0.0023768366465
FBgn0033021	0.0325814536341	0.015873015873	0.0401869158879	0.0392648287385	0.0140186915888	0.0691588785047	0.0651629072682	0.0130841121495	0.0023768366465
FBgn0015946	0.0325814536341	0.015873015873	0.00715071507151	0.0392648287385	0.0	0.00715071507151	0.0651629072682	0.001100110011	0.0023768366465
FBgn0015949	0.00282007896221	0.00112803158488	0.00630733944954	0.00338409475465	0.00286697247706	0.00974770642202	0.00507614213198	0.00172018348624	0.0023768366465
FBgn0019624	0.00282007896221	0.00112803158488	0.00630733944954	0.00338409475465	0.00286697247706	0.00974770642202	0.00507614213198	0.00172018348624	0.0023768366465
FBgn0030745	0.0325814536341	0.015873015873	0.0401869158879	0.0392648287385	0.0140186915888	0.0691588785047	0.0651629072682	0.0130841121495	0.0023768366465
FBgn0031599	0.0325814536341	0.015873015873	0.00630733944954	0.0392648287385	0.00286697247706	0.00974770642202	0.0651629072682	0.00172018348624	0.0023768366465
FBgn0031590	0.00282007896221	0.00112803158488	0.00630733944954	0.00338409475465	0.00286697247706	0.00974770642202	0.00507614213198	0.00172018348624	0.0023768366465
FBgn0030352	0.00282007896221	0.00112803158488	0.00630733944954	0.00338409475465	0.00286697247706	0.00974770642202	0.00507614213198	0.00172018348624	0.0023768366465
FBgn0037435	0.00282007896221	0.00112803158488	0.00630733944954	0.00338409475465	0.00286697247706	0.00974770642202	0.00507614213198	0.00172018348624	0.0023768366465
FBgn0030357	0.0198555956679	0.00180505415162	0.00715071507151	0.00361010830325	0.0	0.00715071507151	0.0228640192539	0.001100110011	0.0023768366465
FBgn0030358	0.0325814536341	0.015873015873	0.00715071507151	0.0392648287385	0.0	0.00715071507151	0.0651629072682	0.001100110011	0.0023768366465
FBgn0036813	0.00282007896221	0.00112803158488	0.00630733944954	0.00338409475465	0.00286697247706	0.00974770642202	0.00507614213198	0.00172018348624	0.0023768366465
FBgn0036740	0.00282007896221	0.00112803158488	0.00630733944954	0.00338409475465	0.00286697247706	0.00974770642202	0.00507614213198	0.00172018348624	0.0023768366465
FBgn0036741	0.00282007896221	0.00112803158488	0.00630733944954	0.00338409475465	0.00286697247706	0.00974770642202	0.00507614213198	0.00172018348624	0.0023768366465
FBgn0033990	0.00282007896221	0.00112803158488	0.00630733944954	0.00338409475465	0.00286697247706	0.00974770642202	0.00507614213198	0.00172018348624	0.0023768366465
FBgn0033996	0.00282007896221	0.00112803158488	0.00630733944954	0.00338409475465	0.00286697247706	0.00974770642202	0.00507614213198	0.00172018348624	0.0023768366465
FBgn0005638	0.0325814536341	0.015873015873	0.00715071507151	0.0392648287385	0.0	0.00715071507151	0.0651629072682	0.001100110011	0.0023768366465
FBgn0034523	0.00282007896221	0.00112803158488	0.00630733944954	0.00338409475465	0.00286697247706	0.00974770642202	0.00507614213198	0.00172018348624	0.0023768366465
FBgn0034520	0.0198555956679	0.00180505415162	0.0401869158879	0.00361010830325	0.0140186915888	0.0691588785047	0.0228640192539	0.0130841121495	0.0023768366465
FBgn0002901	0.00282007896221	0.00112803158488	0.00630733944954	0.00338409475465	0.00286697247706	0.00974770642202	0.00507614213198	0.00172018348624	0.0023768366465
FBgn0011217	0.0325814536341	0.015873015873	0.0401869158879	0.0392648287385	0.0140186915888	0.0691588785047	0.0651629072682	0.0130841121495	0.0023768366465
FBgn0010356	0.00282007896221	0.00112803158488	0.00630733944954	0.00338409475465	0.00286697247706	0.00974770642202	0.00507614213198	0.00172018348624	0.0023768366465
FBgn0010350	0.00282007896221	0.00112803158488	0.00630733944954	0.00338409475465	0.00286697247706	0.00974770642202	0.00507614213198	0.00172018348624	0.0023768366465
FBgn0010359	0.0198555956679	0.00180505415162	0.00715071507151	0.00361010830325	0.0	0.00715071507151	0.0228640192539	0.001100110011	0.0023768366465
FBgn0037299	0.00282007896221	0.00112803158488	0.00630733944954	0.00338409475465	0.00286697247706	0.00974770642202	0.00507614213198	0.00172018348624	0.0023768366465
FBgn0037295	0.0198555956679	0.00180505415162	0.00715071507151	0.00361010830325	0.0	0.00715071507151	0.0228640192539	0.001100110011	0.0023768366465
FBgn0037297	0.00282007896221	0.00112803158488	0.00630733944954	0.00338409475465	0.00286697247706	0.00974770642202	0.00507614213198	0.00172018348624	0.0023768366465
FBgn0037296	0.00282007896221	0.00112803158488	0.00630733944954	0.00338409475465	0.00286697247706	0.00974770642202	0.00507614213198	0.00172018348624	0.0023768366465
FBgn0037291	0.0198555956679	0.00180505415162	0.00715071507151	0.00361010830325	0.0	0.00715071507151	0.0228640192539	0.001100110011	0.0023768366465
FBgn0037290	0.0198555956679	0.00180505415162	0.00715071507151	0.00361010830325	0.0	0.00715071507151	0.0228640192539	0.001100110011	0.0023768366465
FBgn0037293	0.00282007896221	0.00112803158488	0.00630733944954	0.00338409475465	0.00286697247706	0.00974770642202	0.00507614213198	0.00172018348624	0.0023768366465
FBgn0050194	0.0198555956679	0.00180505415162	0.00715071507151	0.00361010830325	0.0	0.00715071507151	0.0228640192539	0.001100110011	0.0023768366465
FBgn0050197	0.0325814536341	0.015873015873	0.00715071507151	0.0392648287385	0.0	0.00715071507151	0.0651629072682	0.001100110011	0.0023768366465
FBgn0032066	0.0198555956679	0.00180505415162	0.00715071507151	0.00361010830325	0.0	0.00715071507151	0.0228640192539	0.001100110011	0.0023768366465
FBgn0032061	0.0198555956679	0.00180505415162	0.00715071507151	0.00361010830325	0.0	0.00715071507151	0.0228640192539	0.001100110011	0.0023768366465
FBgn0004885	0.0325814536341	0.015873015873	0.0401869158879	0.0392648287385	0.0140186915888	0.0691588785047	0.0651629072682	0.0130841121495	0.0023768366465
FBgn0032068	0.0198555956679	0.00180505415162	0.00715071507151	0.00361010830325	0.0	0.00715071507151	0.0228640192539	0.001100110011	0.0023768366465
FBgn0004880	0.0325814536341	0.015873015873	0.0401869158879	0.0392648287385	0.0140186915888	0.0691588785047	0.0651629072682	0.0130841121495	0.0023768366465
FBgn0032451	0.00282007896221	0.00112803158488	0.00630733944954	0.00338409475465	0.00286697247706	0.00974770642202	0.00507614213198	0.00172018348624	0.0023768366465
FBgn0039269	0.00282007896221	0.00112803158488	0.00630733944954	0.00338409475465	0.00286697247706	0.00974770642202	0.00507614213198	0.00172018348624	0.0023768366465
FBgn0033195	0.00282007896221	0.00112803158488	0.00630733944954	0.00338409475465	0.00286697247706	0.00974770642202	0.00507614213198	0.00172018348624	0.0023768366465
FBgn0032249	0.0325814536341	0.015873015873	0.0401869158879	0.0392648287385	0.0140186915888	0.0691588785047	0.0651629072682	0.0130841121495	0.0023768366465
FBgn0032248	0.00282007896221	0.00112803158488	0.00630733944954	0.00338409475465	0.00286697247706	0.00974770642202	0.00507614213198	0.00172018348624	0.0023768366465
FBgn0039298	0.0198555956679	0.00180505415162	0.00715071507151	0.00361010830325	0.0	0.00715071507151	0.0228640192539	0.001100110011	0.0023768366465
FBgn0039297	0.0198555956679	0.00180505415162	0.00715071507151	0.00361010830325	0.0	0.00715071507151	0.0228640192539	0.001100110011	0.0023768366465
FBgn0032243	0.00282007896221	0.00112803158488	0.0401869158879	0.00338409475465	0.0140186915888	0.0691588785047	0.00507614213198	0.0130841121495	0.0023768366465
FBgn0039293	0.00282007896221	0.00112803158488	0.00630733944954	0.00338409475465	0.00286697247706	0.00974770642202	0.00507614213198	0.00172018348624	0.0023768366465
FBgn0032246	0.00282007896221	0.00112803158488	0.00630733944954	0.00338409475465	0.00286697247706	0.00974770642202	0.00507614213198	0.00172018348624	0.0023768366465
FBgn0001612	0.00282007896221	0.00112803158488	0.00630733944954	0.00338409475465	0.00286697247706	0.00974770642202	0.00507614213198	0.00172018348624	0.0023768366465
FBgn0025693	0.0325814536341	0.015873015873	0.0401869158879	0.0392648287385	0.0140186915888	0.0691588785047	0.0651629072682	0.0130841121495	0.0023768366465
FBgn0037996	0.0198555956679	0.00180505415162	0.00715071507151	0.00361010830325	0.0	0.00715071507151	0.0228640192539	0.001100110011	0.0023768366465
FBgn0037994	0.0198555956679	0.00180505415162	0.00715071507151	0.00361010830325	0.0	0.00715071507151	0.0228640192539	0.001100110011	0.0023768366465
FBgn0037995	0.0198555956679	0.00180505415162	0.00715071507151	0.00361010830325	0.0	0.00715071507151	0.0228640192539	0.001100110011	0.0023768366465
FBgn0037992	0.0325814536341	0.015873015873	0.00715071507151	0.0392648287385	0.0	0.00715071507151	0.0651629072682	0.001100110011	0.0023768366465
FBgn0037993	0.0198555956679	0.00180505415162	0.00715071507151	0.00361010830325	0.0	0.00715071507151	0.0228640192539	0.001100110011	0.0023768366465
FBgn0037998	0.00282007896221	0.00112803158488	0.00630733944954	0.00338409475465	0.00286697247706	0.00974770642202	0.00507614213198	0.00172018348624	0.0023768366465
FBgn0037999	0.0198555956679	0.00180505415162	0.00715071507151	0.00361010830325	0.0	0.00715071507151	0.0228640192539	0.001100110011	0.0023768366465
FBgn0028523	0.0198555956679	0.00180505415162	0.00715071507151	0.00361010830325	0.0	0.00715071507151	0.0228640192539	0.001100110011	0.0023768366465
FBgn0028520	0.0198555956679	0.00180505415162	0.00715071507151	0.00361010830325	0.0	0.00715071507151	0.0228640192539	0.001100110011	0.0023768366465
FBgn0028527	0.0325814536341	0.015873015873	0.0401869158879	0.0392648287385	0.0140186915888	0.0691588785047	0.0651629072682	0.0130841121495	0.0023768366465
FBgn0028525	0.0325814536341	0.015873015873	0.0401869158879	0.0392648287385	0.0140186915888	0.0691588785047	0.0651629072682	0.0130841121495	0.0023768366465
FBgn0029123	0.0198555956679	0.00180505415162	0.0401869158879	0.00361010830325	0.0140186915888	0.0691588785047	0.0228640192539	0.0130841121495	0.0023768366465
FBgn0038528	0.0198555956679	0.00180505415162	0.00715071507151	0.00361010830325	0.0	0.00715071507151	0.0228640192539	0.001100110011	0.0023768366465
FBgn0035049	0.0325814536341	0.015873015873	0.00715071507151	0.0392648287385	0.0	0.00715071507151	0.0651629072682	0.001100110011	0.0023768366465
FBgn0035730	0.0198555956679	0.00180505415162	0.00715071507151	0.00361010830325	0.0	0.00715071507151	0.0228640192539	0.001100110011	0.0023768366465
FBgn0035047	0.00282007896221	0.00112803158488	0.00630733944954	0.00338409475465	0.00286697247706	0.00974770642202	0.00507614213198	0.00172018348624	0.0023768366465
FBgn0035734	0.0198555956679	0.00180505415162	0.00715071507151	0.00361010830325	0.0	0.00715071507151	0.0228640192539	0.001100110011	0.0023768366465
FBgn0003612	0.00282007896221	0.00112803158488	0.00630733944954	0.00338409475465	0.00286697247706	0.00974770642202	0.00507614213198	0.00172018348624	0.0023768366465
FBgn0031745	0.0325814536341	0.015873015873	0.0401869158879	0.0392648287385	0.0140186915888	0.0691588785047	0.0651629072682	0.0130841121495	0.0023768366465
FBgn0031296	0.0198555956679	0.00180505415162	0.00715071507151	0.00361010830325	0.0	0.00715071507151	0.0228640192539	0.001100110011	0.0023768366465
FBgn0031747	0.0198555956679	0.00180505415162	0.00715071507151	0.00361010830325	0.0	0.00715071507151	0.0228640192539	0.001100110011	0.0023768366465
FBgn0031749	0.0198555956679	0.00180505415162	0.00715071507151	0.00361010830325	0.0	0.00715071507151	0.0228640192539	0.001100110011	0.0023768366465
FBgn0031299	0.0198555956679	0.00180505415162	0.0401869158879	0.00361010830325	0.0140186915888	0.0691588785047	0.0228640192539	0.0130841121495	0.0023768366465
FBgn0031298	0.00282007896221	0.00112803158488	0.00630733944954	0.00338409475465	0.00286697247706	0.00974770642202	0.00507614213198	0.00172018348624	0.0023768366465
FBgn0017482	0.0325814536341	0.015873015873	0.0401869158879	0.0392648287385	0.0140186915888	0.0691588785047	0.0651629072682	0.0130841121495	0.0023768366465
FBgn0052037	0.0198555956679	0.00180505415162	0.0401869158879	0.00361010830325	0.0140186915888	0.0691588785047	0.0228640192539	0.0130841121495	0.0023768366465
FBgn0052030	0.0325814536341	0.015873015873	0.0401869158879	0.0392648287385	0.0140186915888	0.0691588785047	0.0651629072682	0.0130841121495	0.0023768366465
FBgn0052039	0.0325814536341	0.015873015873	0.00630733944954	0.0392648287385	0.00286697247706	0.00974770642202	0.0651629072682	0.00172018348624	0.0023768366465
FBgn0025592	0.0325814536341	0.015873015873	0.0401869158879	0.0392648287385	0.0140186915888	0.0691588785047	0.0651629072682	0.0130841121495	0.0023768366465
FBgn0016687	0.00282007896221	0.00112803158488	0.00630733944954	0.00338409475465	0.00286697247706	0.00974770642202	0.00507614213198	0.00172018348624	0.0023768366465
FBgn0016685	0.00282007896221	0.00112803158488	0.00630733944954	0.00338409475465	0.00286697247706	0.00974770642202	0.00507614213198	0.00172018348624	0.0023768366465
FBgn0016684	0.0198555956679	0.00180505415162	0.0401869158879	0.00361010830325	0.0140186915888	0.0691588785047	0.0228640192539	0.0130841121495	0.0023768366465
FBgn0035226	0.00282007896221	0.00112803158488	0.00630733944954	0.00338409475465	0.00286697247706	0.00974770642202	0.00507614213198	0.00172018348624	0.0023768366465
FBgn0051109	0.00282007896221	0.00112803158488	0.00630733944954	0.00338409475465	0.00286697247706	0.00974770642202	0.00507614213198	0.00172018348624	0.0023768366465
FBgn0051108	0.00282007896221	0.00112803158488	0.00630733944954	0.00338409475465	0.00286697247706	0.00974770642202	0.00507614213198	0.00172018348624	0.0023768366465
FBgn0031129	0.0198555956679	0.00180505415162	0.00715071507151	0.00361010830325	0.0	0.00715071507151	0.0228640192539	0.001100110011	0.0023768366465
FBgn0039730	0.00282007896221	0.00112803158488	0.00630733944954	0.00338409475465	0.00286697247706	0.00974770642202	0.00507614213198	0.00172018348624	0.0023768366465
FBgn0039732	0.00282007896221	0.00112803158488	0.00630733944954	0.00338409475465	0.00286697247706	0.00974770642202	0.00507614213198	0.00172018348624	0.0023768366465
FBgn0039733	0.00282007896221	0.00112803158488	0.00630733944954	0.00338409475465	0.00286697247706	0.00974770642202	0.00507614213198	0.00172018348624	0.0023768366465
FBgn0039738	0.0325814536341	0.015873015873	0.0401869158879	0.0392648287385	0.0140186915888	0.0691588785047	0.0651629072682	0.0130841121495	0.0023768366465
FBgn0031127	0.0198555956679	0.00180505415162	0.00715071507151	0.00361010830325	0.0	0.00715071507151	0.0228640192539	0.001100110011	0.0023768366465
FBgn0030658	0.00282007896221	0.00112803158488	0.00630733944954	0.00338409475465	0.00286697247706	0.00974770642202	0.00507614213198	0.00172018348624	0.0023768366465
FBgn0030659	0.00282007896221	0.00112803158488	0.00630733944954	0.00338409475465	0.00286697247706	0.00974770642202	0.00507614213198	0.00172018348624	0.0023768366465
FBgn0037359	0.00282007896221	0.00112803158488	0.00630733944954	0.00338409475465	0.00286697247706	0.00974770642202	0.00507614213198	0.00172018348624	0.0023768366465
FBgn0037609	0.00282007896221	0.00112803158488	0.00630733944954	0.00338409475465	0.00286697247706	0.00974770642202	0.00507614213198	0.00172018348624	0.0023768366465
FBgn0037354	0.0325814536341	0.015873015873	0.0401869158879	0.0392648287385	0.0140186915888	0.0691588785047	0.0651629072682	0.0130841121495	0.0023768366465
FBgn0037607	0.0325814536341	0.015873015873	0.0401869158879	0.0392648287385	0.0140186915888	0.0691588785047	0.0651629072682	0.0130841121495	0.0023768366465
FBgn0014135	0.0198555956679	0.00180505415162	0.0401869158879	0.00361010830325	0.0140186915888	0.0691588785047	0.0228640192539	0.0130841121495	0.0023768366465
FBgn0030653	0.0198555956679	0.00180505415162	0.00715071507151	0.00361010830325	0.0	0.00715071507151	0.0228640192539	0.001100110011	0.0023768366465
FBgn0030655	0.00282007896221	0.00112803158488	0.00630733944954	0.00338409475465	0.00286697247706	0.00974770642202	0.00507614213198	0.00172018348624	0.0023768366465
FBgn0030657	0.00282007896221	0.00112803158488	0.00630733944954	0.00338409475465	0.00286697247706	0.00974770642202	0.00507614213198	0.00172018348624	0.0023768366465
FBgn0011741	0.00282007896221	0.00112803158488	0.00630733944954	0.00338409475465	0.00286697247706	0.00974770642202	0.00507614213198	0.00172018348624	0.0023768366465
FBgn0011740	0.00282007896221	0.00112803158488	0.00630733944954	0.00338409475465	0.00286697247706	0.00974770642202	0.00507614213198	0.00172018348624	0.0023768366465
FBgn0011745	0.00282007896221	0.00112803158488	0.00630733944954	0.00338409475465	0.00286697247706	0.00974770642202	0.00507614213198	0.00172018348624	0.0023768366465
FBgn0000567	0.0198555956679	0.00180505415162	0.00715071507151	0.00361010830325	0.0	0.00715071507151	0.0228640192539	0.001100110011	0.0023768366465
FBgn0030309	0.0198555956679	0.00180505415162	0.00715071507151	0.00361010830325	0.0	0.00715071507151	0.0228640192539	0.001100110011	0.0023768366465
FBgn0040284	0.00282007896221	0.00112803158488	0.00630733944954	0.00338409475465	0.00286697247706	0.00974770642202	0.00507614213198	0.00172018348624	0.0023768366465
FBgn0040282	0.0198555956679	0.00180505415162	0.00715071507151	0.00361010830325	0.0	0.00715071507151	0.0228640192539	0.001100110011	0.0023768366465
FBgn0020369	0.00282007896221	0.00112803158488	0.00630733944954	0.00338409475465	0.00286697247706	0.00974770642202	0.00507614213198	0.00172018348624	0.0023768366465
FBgn0035571	0.0198555956679	0.00180505415162	0.00715071507151	0.00361010830325	0.0	0.00715071507151	0.0228640192539	0.001100110011	0.0023768366465
FBgn0035146	0.0325814536341	0.015873015873	0.0401869158879	0.0392648287385	0.0140186915888	0.0691588785047	0.0651629072682	0.0130841121495	0.0023768366465
FBgn0014865	0.0198555956679	0.00180505415162	0.00715071507151	0.00361010830325	0.0	0.00715071507151	0.0228640192539	0.001100110011	0.0023768366465
FBgn0050503	0.00282007896221	0.00112803158488	0.00630733944954	0.00338409475465	0.00286697247706	0.00974770642202	0.00507614213198	0.00172018348624	0.0023768366465
FBgn0038465	0.0325814536341	0.015873015873	0.0401869158879	0.0392648287385	0.0140186915888	0.0691588785047	0.0651629072682	0.0130841121495	0.0023768366465
FBgn0014863	0.0325814536341	0.015873015873	0.00715071507151	0.0392648287385	0.0	0.00715071507151	0.0651629072682	0.001100110011	0.0023768366465
FBgn0038464	0.00282007896221	0.00112803158488	0.00630733944954	0.00338409475465	0.00286697247706	0.00974770642202	0.00507614213198	0.00172018348624	0.0023768366465
FBgn0033292	0.0198555956679	0.00180505415162	0.00715071507151	0.00361010830325	0.0	0.00715071507151	0.0228640192539	0.001100110011	0.0023768366465
FBgn0033297	0.0198555956679	0.00180505415162	0.00715071507151	0.00361010830325	0.0	0.00715071507151	0.0228640192539	0.001100110011	0.0023768366465
FBgn0035141	0.00282007896221	0.00112803158488	0.00630733944954	0.00338409475465	0.00286697247706	0.00974770642202	0.00507614213198	0.00172018348624	0.0023768366465
FBgn0030306	0.00282007896221	0.00112803158488	0.00630733944954	0.00338409475465	0.00286697247706	0.00974770642202	0.00507614213198	0.00172018348624	0.0023768366465
FBgn0034956	0.0325814536341	0.015873015873	0.0401869158879	0.0392648287385	0.0140186915888	0.0691588785047	0.0651629072682	0.0130841121495	0.0023768366465
FBgn0030304	0.0198555956679	0.00180505415162	0.00715071507151	0.00361010830325	0.0	0.00715071507151	0.0228640192539	0.001100110011	0.0023768366465
FBgn0038063	0.0198555956679	0.00180505415162	0.00715071507151	0.00361010830325	0.0	0.00715071507151	0.0228640192539	0.001100110011	0.0023768366465
FBgn0032378	0.00282007896221	0.00112803158488	0.00630733944954	0.00338409475465	0.00286697247706	0.00974770642202	0.00507614213198	0.00172018348624	0.0023768366465
FBgn0033079	0.0325814536341	0.015873015873	0.0401869158879	0.0392648287385	0.0140186915888	0.0691588785047	0.0651629072682	0.0130841121495	0.0023768366465
FBgn0036004	0.00282007896221	0.00112803158488	0.00630733944954	0.00338409475465	0.00286697247706	0.00974770642202	0.00507614213198	0.00172018348624	0.0023768366465
FBgn0033075	0.0325814536341	0.015873015873	0.00715071507151	0.0392648287385	0.0	0.00715071507151	0.0651629072682	0.001100110011	0.0023768366465
FBgn0036008	0.00282007896221	0.00112803158488	0.0401869158879	0.00338409475465	0.0140186915888	0.0691588785047	0.00507614213198	0.0130841121495	0.0023768366465
FBgn0036551	0.0325814536341	0.015873015873	0.0401869158879	0.0392648287385	0.0140186915888	0.0691588785047	0.0651629072682	0.0130841121495	0.0023768366465
FBgn0033072	0.0198555956679	0.00180505415162	0.00715071507151	0.00361010830325	0.0	0.00715071507151	0.0228640192539	0.001100110011	0.0023768366465
FBgn0015623	0.00282007896221	0.00112803158488	0.00630733944954	0.00338409475465	0.00286697247706	0.00974770642202	0.00507614213198	0.00172018348624	0.0023768366465
FBgn0015625	0.0325814536341	0.015873015873	0.00630733944954	0.0392648287385	0.00286697247706	0.00974770642202	0.0651629072682	0.00172018348624	0.0023768366465
FBgn0039850	0.0325814536341	0.015873015873	0.0401869158879	0.0392648287385	0.0140186915888	0.0691588785047	0.0651629072682	0.0130841121495	0.0023768366465
FBgn0001114	0.0325814536341	0.015873015873	0.00715071507151	0.0392648287385	0.0	0.00715071507151	0.0651629072682	0.001100110011	0.0023768366465
FBgn0001112	0.0325814536341	0.015873015873	0.00715071507151	0.0392648287385	0.0	0.00715071507151	0.0651629072682	0.001100110011	0.0023768366465
FBgn0035926	0.0198555956679	0.00180505415162	0.00715071507151	0.00361010830325	0.0	0.00715071507151	0.0228640192539	0.001100110011	0.0023768366465
FBgn0035921	0.0198555956679	0.00180505415162	0.00715071507151	0.00361010830325	0.0	0.00715071507151	0.0228640192539	0.001100110011	0.0023768366465
FBgn0028540	0.0325814536341	0.015873015873	0.0401869158879	0.0392648287385	0.0140186915888	0.0691588785047	0.0651629072682	0.0130841121495	0.0023768366465
FBgn0035929	0.0198555956679	0.00180505415162	0.00715071507151	0.00361010830325	0.0	0.00715071507151	0.0228640192539	0.001100110011	0.0023768366465
FBgn0033757	0.00282007896221	0.00112803158488	0.0401869158879	0.00338409475465	0.0140186915888	0.0691588785047	0.00507614213198	0.0130841121495	0.0023768366465
FBgn0003510	0.0198555956679	0.00180505415162	0.0401869158879	0.00361010830325	0.0140186915888	0.0691588785047	0.0228640192539	0.0130841121495	0.0023768366465
FBgn0033751	0.00282007896221	0.00112803158488	0.00630733944954	0.00338409475465	0.00286697247706	0.00974770642202	0.00507614213198	0.00172018348624	0.0023768366465
FBgn0021776	0.0325814536341	0.015873015873	0.0401869158879	0.0392648287385	0.0140186915888	0.0691588785047	0.0651629072682	0.0130841121495	0.0023768366465
FBgn0052627	0.0198555956679	0.00180505415162	0.00715071507151	0.00361010830325	0.0	0.00715071507151	0.0228640192539	0.001100110011	0.0023768366465
FBgn0052626	0.0325814536341	0.015873015873	0.00715071507151	0.0392648287385	0.0	0.00715071507151	0.0651629072682	0.001100110011	0.0023768366465
FBgn0037645	0.0325814536341	0.015873015873	0.00715071507151	0.0392648287385	0.0	0.00715071507151	0.0651629072682	0.001100110011	0.0023768366465
FBgn0034438	0.0325814536341	0.015873015873	0.0401869158879	0.0392648287385	0.0140186915888	0.0691588785047	0.0651629072682	0.0130841121495	0.0023768366465
FBgn0032652	0.0325814536341	0.015873015873	0.00715071507151	0.0392648287385	0.0	0.00715071507151	0.0651629072682	0.001100110011	0.0023768366465
FBgn0032651	0.0325814536341	0.015873015873	0.0401869158879	0.0392648287385	0.0140186915888	0.0691588785047	0.0651629072682	0.0130841121495	0.0023768366465
FBgn0032656	0.00282007896221	0.00112803158488	0.00630733944954	0.00338409475465	0.00286697247706	0.00974770642202	0.00507614213198	0.00172018348624	0.0023768366465
FBgn0031914	0.0325814536341	0.015873015873	0.0401869158879	0.0392648287385	0.0140186915888	0.0691588785047	0.0651629072682	0.0130841121495	0.0023768366465
FBgn0052485	0.0325814536341	0.015873015873	0.0401869158879	0.0392648287385	0.0140186915888	0.0691588785047	0.0651629072682	0.0130841121495	0.0023768366465
FBgn0025458	0.0325814536341	0.015873015873	0.0401869158879	0.0392648287385	0.0140186915888	0.0691588785047	0.0651629072682	0.0130841121495	0.0023768366465
FBgn0025109	0.00282007896221	0.00112803158488	0.00630733944954	0.00338409475465	0.00286697247706	0.00974770642202	0.00507614213198	0.00172018348624	0.0023768366465
FBgn0025455	0.00282007896221	0.00112803158488	0.00630733944954	0.00338409475465	0.00286697247706	0.00974770642202	0.00507614213198	0.00172018348624	0.0023768366465
FBgn0003261	0.00282007896221	0.00112803158488	0.00630733944954	0.00338409475465	0.00286697247706	0.00974770642202	0.00507614213198	0.00172018348624	0.0023768366465
FBgn0031457	0.00282007896221	0.00112803158488	0.00630733944954	0.00338409475465	0.00286697247706	0.00974770642202	0.00507614213198	0.00172018348624	0.0023768366465
FBgn0034032	0.00282007896221	0.00112803158488	0.0401869158879	0.00338409475465	0.0140186915888	0.0691588785047	0.00507614213198	0.0130841121495	0.0023768366465
FBgn0029594	0.00282007896221	0.00112803158488	0.0401869158879	0.00338409475465	0.0140186915888	0.0691588785047	0.00507614213198	0.0130841121495	0.0023768366465
FBgn0039125	0.00282007896221	0.00112803158488	0.00630733944954	0.00338409475465	0.00286697247706	0.00974770642202	0.00507614213198	0.00172018348624	0.0023768366465
FBgn0039124	0.0198555956679	0.00180505415162	0.00715071507151	0.00361010830325	0.0	0.00715071507151	0.0228640192539	0.001100110011	0.0023768366465
FBgn0039127	0.0325814536341	0.015873015873	0.0401869158879	0.0392648287385	0.0140186915888	0.0691588785047	0.0651629072682	0.0130841121495	0.0023768366465
FBgn0039126	0.00282007896221	0.00112803158488	0.00630733944954	0.00338409475465	0.00286697247706	0.00974770642202	0.00507614213198	0.00172018348624	0.0023768366465
FBgn0039129	0.0325814536341	0.015873015873	0.0401869158879	0.0392648287385	0.0140186915888	0.0691588785047	0.0651629072682	0.0130841121495	0.0023768366465
FBgn0039128	0.00282007896221	0.00112803158488	0.00630733944954	0.00338409475465	0.00286697247706	0.00974770642202	0.00507614213198	0.00172018348624	0.0023768366465
FBgn0031351	0.00282007896221	0.00112803158488	0.00630733944954	0.00338409475465	0.00286697247706	0.00974770642202	0.00507614213198	0.00172018348624	0.0023768366465
FBgn0031359	0.00282007896221	0.00112803158488	0.00630733944954	0.00338409475465	0.00286697247706	0.00974770642202	0.00507614213198	0.00172018348624	0.0023768366465
FBgn0012049	0.00282007896221	0.00112803158488	0.00630733944954	0.00338409475465	0.00286697247706	0.00974770642202	0.00507614213198	0.00172018348624	0.0023768366465
FBgn0011244	0.0198555956679	0.00180505415162	0.00715071507151	0.00361010830325	0.0	0.00715071507151	0.0228640192539	0.001100110011	0.0023768366465
FBgn0035755	0.0325814536341	0.015873015873	0.00715071507151	0.0392648287385	0.0	0.00715071507151	0.0651629072682	0.001100110011	0.0023768366465
FBgn0011241	0.00282007896221	0.00112803158488	0.00630733944954	0.00338409475465	0.00286697247706	0.00974770642202	0.00507614213198	0.00172018348624	0.0023768366465
FBgn0035753	0.00282007896221	0.00112803158488	0.00630733944954	0.00338409475465	0.00286697247706	0.00974770642202	0.00507614213198	0.00172018348624	0.0023768366465
FBgn0030166	0.0198555956679	0.00180505415162	0.00715071507151	0.00361010830325	0.0	0.00715071507151	0.0228640192539	0.001100110011	0.0023768366465
FBgn0038582	0.00282007896221	0.00112803158488	0.00630733944954	0.00338409475465	0.00286697247706	0.00974770642202	0.00507614213198	0.00172018348624	0.0023768366465
FBgn0030164	0.0198555956679	0.00180505415162	0.00715071507151	0.00361010830325	0.0	0.00715071507151	0.0228640192539	0.001100110011	0.0023768366465
FBgn0036948	0.0198555956679	0.00180505415162	0.00715071507151	0.00361010830325	0.0	0.00715071507151	0.0228640192539	0.001100110011	0.0023768366465
FBgn0030539	0.0198555956679	0.00180505415162	0.00715071507151	0.00361010830325	0.0	0.00715071507151	0.0228640192539	0.001100110011	0.0023768366465
FBgn0030160	0.0325814536341	0.015873015873	0.00715071507151	0.0392648287385	0.0	0.00715071507151	0.0651629072682	0.001100110011	0.0023768366465
FBgn0036945	0.0325814536341	0.015873015873	0.0401869158879	0.0392648287385	0.0140186915888	0.0691588785047	0.0651629072682	0.0130841121495	0.0023768366465
FBgn0032926	0.00282007896221	0.00112803158488	0.00630733944954	0.00338409475465	0.00286697247706	0.00974770642202	0.00507614213198	0.00172018348624	0.0023768366465
FBgn0034093	0.00282007896221	0.00112803158488	0.0401869158879	0.00338409475465	0.0140186915888	0.0691588785047	0.00507614213198	0.0130841121495	0.0023768366465
FBgn0001150	0.0198555956679	0.00180505415162	0.0401869158879	0.00361010830325	0.0140186915888	0.0691588785047	0.0228640192539	0.0130841121495	0.0023768366465
FBgn0034725	0.0198555956679	0.00180505415162	0.00715071507151	0.00361010830325	0.0	0.00715071507151	0.0228640192539	0.001100110011	0.0023768366465
FBgn0034095	0.00282007896221	0.00112803158488	0.0401869158879	0.00338409475465	0.0140186915888	0.0691588785047	0.00507614213198	0.0130841121495	0.0023768366465
FBgn0038651	0.00282007896221	0.00112803158488	0.00630733944954	0.00338409475465	0.00286697247706	0.00974770642202	0.00507614213198	0.00172018348624	0.0023768366465
FBgn0038652	0.0325814536341	0.015873015873	0.00715071507151	0.0392648287385	0.0	0.00715071507151	0.0651629072682	0.001100110011	0.0023768366465
FBgn0038656	0.0325814536341	0.015873015873	0.00715071507151	0.0392648287385	0.0	0.00715071507151	0.0651629072682	0.001100110011	0.0023768366465
FBgn0038659	0.00282007896221	0.00112803158488	0.00630733944954	0.00338409475465	0.00286697247706	0.00974770642202	0.00507614213198	0.00172018348624	0.0023768366465
FBgn0032923	0.0325814536341	0.015873015873	0.0401869158879	0.0392648287385	0.0140186915888	0.0691588785047	0.0651629072682	0.0130841121495	0.0023768366465
FBgn0036833	0.0198555956679	0.00180505415162	0.00715071507151	0.00361010830325	0.0	0.00715071507151	0.0228640192539	0.001100110011	0.0023768366465
FBgn0030403	0.00282007896221	0.00112803158488	0.00630733944954	0.00338409475465	0.00286697247706	0.00974770642202	0.00507614213198	0.00172018348624	0.0023768366465
FBgn0036839	0.0198555956679	0.00180505415162	0.00715071507151	0.00361010830325	0.0	0.00715071507151	0.0228640192539	0.001100110011	0.0023768366465
FBgn0030409	0.0325814536341	0.015873015873	0.00715071507151	0.0392648287385	0.0	0.00715071507151	0.0651629072682	0.001100110011	0.0023768366465
FBgn0034897	0.0325814536341	0.015873015873	0.0401869158879	0.0392648287385	0.0140186915888	0.0691588785047	0.0651629072682	0.0130841121495	0.0023768366465
FBgn0034894	0.00282007896221	0.00112803158488	0.00630733944954	0.00338409475465	0.00286697247706	0.00974770642202	0.00507614213198	0.00172018348624	0.0023768366465
FBgn0010114	0.0198555956679	0.00180505415162	0.00715071507151	0.00361010830325	0.0	0.00715071507151	0.0228640192539	0.001100110011	0.0023768366465
FBgn0034546	0.0198555956679	0.00180505415162	0.00715071507151	0.00361010830325	0.0	0.00715071507151	0.0228640192539	0.001100110011	0.0023768366465
FBgn0038389	0.00282007896221	0.00112803158488	0.00630733944954	0.00338409475465	0.00286697247706	0.00974770642202	0.00507614213198	0.00172018348624	0.0023768366465
FBgn0034540	0.0198555956679	0.00180505415162	0.00715071507151	0.00361010830325	0.0	0.00715071507151	0.0228640192539	0.001100110011	0.0023768366465
FBgn0038381	0.0198555956679	0.00180505415162	0.00715071507151	0.00361010830325	0.0	0.00715071507151	0.0228640192539	0.001100110011	0.0023768366465
FBgn0038385	0.0325814536341	0.015873015873	0.0401869158879	0.0392648287385	0.0140186915888	0.0691588785047	0.0651629072682	0.0130841121495	0.0023768366465
FBgn0031623	0.0198555956679	0.00180505415162	0.00715071507151	0.00361010830325	0.0	0.00715071507151	0.0228640192539	0.001100110011	0.0023768366465
FBgn0031620	0.0198555956679	0.00180505415162	0.00715071507151	0.00361010830325	0.0	0.00715071507151	0.0228640192539	0.001100110011	0.0023768366465
FBgn0015776	0.0325814536341	0.015873015873	0.0401869158879	0.0392648287385	0.0140186915888	0.0691588785047	0.0651629072682	0.0130841121495	0.0023768366465
FBgn0032849	0.00282007896221	0.00112803158488	0.00630733944954	0.00338409475465	0.00286697247706	0.00974770642202	0.00507614213198	0.00172018348624	0.0023768366465
FBgn0000039	0.0198555956679	0.00180505415162	0.00715071507151	0.00361010830325	0.0	0.00715071507151	0.0228640192539	0.001100110011	0.0023768366465
FBgn0000038	0.0325814536341	0.015873015873	0.00715071507151	0.0392648287385	0.0	0.00715071507151	0.0651629072682	0.001100110011	0.0023768366465
FBgn0015773	0.0198555956679	0.00180505415162	0.0401869158879	0.00361010830325	0.0140186915888	0.0691588785047	0.0228640192539	0.0130841121495	0.0023768366465
FBgn0036769	0.0198555956679	0.00180505415162	0.00715071507151	0.00361010830325	0.0	0.00715071507151	0.0228640192539	0.001100110011	0.0023768366465
FBgn0032008	0.0198555956679	0.00180505415162	0.00715071507151	0.00361010830325	0.0	0.00715071507151	0.0228640192539	0.001100110011	0.0023768366465
FBgn0032005	0.0325814536341	0.015873015873	0.0401869158879	0.0392648287385	0.0140186915888	0.0691588785047	0.0651629072682	0.0130841121495	0.0023768366465
FBgn0032004	0.0198555956679	0.00180505415162	0.00715071507151	0.00361010830325	0.0	0.00715071507151	0.0228640192539	0.001100110011	0.0023768366465
FBgn0032003	0.0198555956679	0.00180505415162	0.00715071507151	0.00361010830325	0.0	0.00715071507151	0.0228640192539	0.001100110011	0.0023768366465
FBgn0032002	0.0325814536341	0.015873015873	0.0401869158879	0.0392648287385	0.0140186915888	0.0691588785047	0.0651629072682	0.0130841121495	0.0023768366465
FBgn0032000	0.00282007896221	0.00112803158488	0.00630733944954	0.00338409475465	0.00286697247706	0.00974770642202	0.00507614213198	0.00172018348624	0.0023768366465
FBgn0004867	0.00282007896221	0.00112803158488	0.00630733944954	0.00338409475465	0.00286697247706	0.00974770642202	0.00507614213198	0.00172018348624	0.0023768366465
FBgn0037011	0.00282007896221	0.00112803158488	0.00630733944954	0.00338409475465	0.00286697247706	0.00974770642202	0.00507614213198	0.00172018348624	0.0023768366465
FBgn0037016	0.0325814536341	0.015873015873	0.00715071507151	0.0392648287385	0.0	0.00715071507151	0.0651629072682	0.001100110011	0.0023768366465
FBgn0037015	0.0325814536341	0.015873015873	0.00715071507151	0.0392648287385	0.0	0.00715071507151	0.0651629072682	0.001100110011	0.0023768366465
FBgn0005198	0.00282007896221	0.00112803158488	0.00630733944954	0.00338409475465	0.00286697247706	0.00974770642202	0.00507614213198	0.00172018348624	0.0023768366465
FBgn0036498	0.0198555956679	0.00180505415162	0.00715071507151	0.00361010830325	0.0	0.00715071507151	0.0228640192539	0.001100110011	0.0023768366465
FBgn0036494	0.0325814536341	0.015873015873	0.0401869158879	0.0392648287385	0.0140186915888	0.0691588785047	0.0651629072682	0.0130841121495	0.0023768366465
FBgn0036496	0.0198555956679	0.00180505415162	0.00715071507151	0.00361010830325	0.0	0.00715071507151	0.0228640192539	0.001100110011	0.0023768366465
FBgn0001325	0.0325814536341	0.015873015873	0.0401869158879	0.0392648287385	0.0140186915888	0.0691588785047	0.0651629072682	0.0130841121495	0.0023768366465
FBgn0053056	0.0325814536341	0.015873015873	0.0401869158879	0.0392648287385	0.0140186915888	0.0691588785047	0.0651629072682	0.0130841121495	0.0023768366465
FBgn0001321	0.0325814536341	0.015873015873	0.00715071507151	0.0392648287385	0.0	0.00715071507151	0.0651629072682	0.001100110011	0.0023768366465
FBgn0001323	0.0325814536341	0.015873015873	0.0401869158879	0.0392648287385	0.0140186915888	0.0691588785047	0.0651629072682	0.0130841121495	0.0023768366465
FBgn0024191	0.00282007896221	0.00112803158488	0.00630733944954	0.00338409475465	0.00286697247706	0.00974770642202	0.00507614213198	0.00172018348624	0.0023768366465
FBgn0038897	0.0325814536341	0.015873015873	0.0401869158879	0.0392648287385	0.0140186915888	0.0691588785047	0.0651629072682	0.0130841121495	0.0023768366465
FBgn0038892	0.0198555956679	0.00180505415162	0.00715071507151	0.00361010830325	0.0	0.00715071507151	0.0228640192539	0.001100110011	0.0023768366465
FBgn0033710	0.0198555956679	0.00180505415162	0.00715071507151	0.00361010830325	0.0	0.00715071507151	0.0228640192539	0.001100110011	0.0023768366465
FBgn0033713	0.00282007896221	0.00112803158488	0.00630733944954	0.00338409475465	0.00286697247706	0.00974770642202	0.00507614213198	0.00172018348624	0.0023768366465
FBgn0033714	0.00282007896221	0.00112803158488	0.00630733944954	0.00338409475465	0.00286697247706	0.00974770642202	0.00507614213198	0.00172018348624	0.0023768366465
FBgn0033715	0.00282007896221	0.00112803158488	0.00630733944954	0.00338409475465	0.00286697247706	0.00974770642202	0.00507614213198	0.00172018348624	0.0023768366465
FBgn0033717	0.0325814536341	0.015873015873	0.0401869158879	0.0392648287385	0.0140186915888	0.0691588785047	0.0651629072682	0.0130841121495	0.0023768366465
FBgn0028507	0.00282007896221	0.00112803158488	0.00630733944954	0.00338409475465	0.00286697247706	0.00974770642202	0.00507614213198	0.00172018348624	0.0023768366465
FBgn0028506	0.00282007896221	0.00112803158488	0.00630733944954	0.00338409475465	0.00286697247706	0.00974770642202	0.00507614213198	0.00172018348624	0.0023768366465
FBgn0028509	0.00282007896221	0.00112803158488	0.00630733944954	0.00338409475465	0.00286697247706	0.00974770642202	0.00507614213198	0.00172018348624	0.0023768366465
FBgn0024991	0.00282007896221	0.00112803158488	0.00630733944954	0.00338409475465	0.00286697247706	0.00974770642202	0.00507614213198	0.00172018348624	0.0023768366465
FBgn0035713	0.00282007896221	0.00112803158488	0.00630733944954	0.00338409475465	0.00286697247706	0.00974770642202	0.00507614213198	0.00172018348624	0.0023768366465
FBgn0035710	0.0325814536341	0.015873015873	0.0401869158879	0.0392648287385	0.0140186915888	0.0691588785047	0.0651629072682	0.0130841121495	0.0023768366465
FBgn0035719	0.0325814536341	0.015873015873	0.00715071507151	0.0392648287385	0.0	0.00715071507151	0.0651629072682	0.001100110011	0.0023768366465
FBgn0033055	0.00282007896221	0.00112803158488	0.00630733944954	0.00338409475465	0.00286697247706	0.00974770642202	0.00507614213198	0.00172018348624	0.0023768366465
FBgn0036106	0.0325814536341	0.015873015873	0.0401869158879	0.0392648287385	0.0140186915888	0.0691588785047	0.0651629072682	0.0130841121495	0.0023768366465
FBgn0032408	0.00282007896221	0.00112803158488	0.00630733944954	0.00338409475465	0.00286697247706	0.00974770642202	0.00507614213198	0.00172018348624	0.0023768366465
FBgn0027538	0.00282007896221	0.00112803158488	0.00630733944954	0.00338409475465	0.00286697247706	0.00974770642202	0.00507614213198	0.00172018348624	0.0023768366465
FBgn0025712	0.0325814536341	0.015873015873	0.0401869158879	0.0392648287385	0.0140186915888	0.0691588785047	0.0651629072682	0.0130841121495	0.0023768366465
FBgn0032404	0.00282007896221	0.00112803158488	0.00630733944954	0.00338409475465	0.00286697247706	0.00974770642202	0.00507614213198	0.00172018348624	0.0023768366465
FBgn0033763	0.0198555956679	0.00180505415162	0.00715071507151	0.00361010830325	0.0	0.00715071507151	0.0228640192539	0.001100110011	0.0023768366465
FBgn0031726	0.0198555956679	0.00180505415162	0.00715071507151	0.00361010830325	0.0	0.00715071507151	0.0228640192539	0.001100110011	0.0023768366465
FBgn0031723	0.0198555956679	0.00180505415162	0.00715071507151	0.00361010830325	0.0	0.00715071507151	0.0228640192539	0.001100110011	0.0023768366465
FBgn0031722	0.0198555956679	0.00180505415162	0.00715071507151	0.00361010830325	0.0	0.00715071507151	0.0228640192539	0.001100110011	0.0023768366465
FBgn0031721	0.0198555956679	0.00180505415162	0.00715071507151	0.00361010830325	0.0	0.00715071507151	0.0228640192539	0.001100110011	0.0023768366465
FBgn0030098	0.0198555956679	0.00180505415162	0.00715071507151	0.00361010830325	0.0	0.00715071507151	0.0228640192539	0.001100110011	0.0023768366465
FBgn0030096	0.00282007896221	0.00112803158488	0.00630733944954	0.00338409475465	0.00286697247706	0.00974770642202	0.00507614213198	0.00172018348624	0.0023768366465
FBgn0030097	0.0198555956679	0.00180505415162	0.00715071507151	0.00361010830325	0.0	0.00715071507151	0.0228640192539	0.001100110011	0.0023768366465
FBgn0030092	0.00282007896221	0.00112803158488	0.00630733944954	0.00338409475465	0.00286697247706	0.00974770642202	0.00507614213198	0.00172018348624	0.0023768366465
FBgn0030093	0.00282007896221	0.00112803158488	0.00630733944954	0.00338409475465	0.00286697247706	0.00974770642202	0.00507614213198	0.00172018348624	0.0023768366465
FBgn0051200	0.0198555956679	0.00180505415162	0.00715071507151	0.00361010830325	0.0	0.00715071507151	0.0228640192539	0.001100110011	0.0023768366465
FBgn0039719	0.0198555956679	0.00180505415162	0.00715071507151	0.00361010830325	0.0	0.00715071507151	0.0228640192539	0.001100110011	0.0023768366465
FBgn0039714	0.00282007896221	0.00112803158488	0.00630733944954	0.00338409475465	0.00286697247706	0.00974770642202	0.00507614213198	0.00172018348624	0.0023768366465
FBgn0039712	0.00282007896221	0.00112803158488	0.00630733944954	0.00338409475465	0.00286697247706	0.00974770642202	0.00507614213198	0.00172018348624	0.0023768366465
FBgn0039713	0.00282007896221	0.00112803158488	0.00630733944954	0.00338409475465	0.00286697247706	0.00974770642202	0.00507614213198	0.00172018348624	0.0023768366465
FBgn0039710	0.00282007896221	0.00112803158488	0.00630733944954	0.00338409475465	0.00286697247706	0.00974770642202	0.00507614213198	0.00172018348624	0.0023768366465
FBgn0039711	0.0325814536341	0.015873015873	0.0401869158879	0.0392648287385	0.0140186915888	0.0691588785047	0.0651629072682	0.0130841121495	0.0023768366465
FBgn0034390	0.0198555956679	0.00180505415162	0.00715071507151	0.00361010830325	0.0	0.00715071507151	0.0228640192539	0.001100110011	0.0023768366465
FBgn0034392	0.00282007896221	0.00112803158488	0.00630733944954	0.00338409475465	0.00286697247706	0.00974770642202	0.00507614213198	0.00172018348624	0.0023768366465
FBgn0034396	0.0198555956679	0.00180505415162	0.00715071507151	0.00361010830325	0.0	0.00715071507151	0.0228640192539	0.001100110011	0.0023768366465
FBgn0037166	0.0325814536341	0.015873015873	0.00715071507151	0.0392648287385	0.0	0.00715071507151	0.0651629072682	0.001100110011	0.0023768366465
FBgn0030670	0.00282007896221	0.00112803158488	0.00630733944954	0.00338409475465	0.00286697247706	0.00974770642202	0.00507614213198	0.00172018348624	0.0023768366465
FBgn0030675	0.00282007896221	0.00112803158488	0.00630733944954	0.00338409475465	0.00286697247706	0.00974770642202	0.00507614213198	0.00172018348624	0.0023768366465
FBgn0030678	0.00282007896221	0.00112803158488	0.00630733944954	0.00338409475465	0.00286697247706	0.00974770642202	0.00507614213198	0.00172018348624	0.0023768366465
FBgn0030679	0.00282007896221	0.00112803158488	0.00630733944954	0.00338409475465	0.00286697247706	0.00974770642202	0.00507614213198	0.00172018348624	0.0023768366465
FBgn0011768	0.0325814536341	0.015873015873	0.0401869158879	0.0392648287385	0.0140186915888	0.0691588785047	0.0651629072682	0.0130841121495	0.0023768366465
FBgn0011764	0.00282007896221	0.00112803158488	0.00630733944954	0.00338409475465	0.00286697247706	0.00974770642202	0.00507614213198	0.00172018348624	0.0023768366465
FBgn0011766	0.0325814536341	0.015873015873	0.0401869158879	0.0392648287385	0.0140186915888	0.0691588785047	0.0651629072682	0.0130841121495	0.0023768366465
FBgn0011761	0.0198555956679	0.00180505415162	0.0401869158879	0.00361010830325	0.0140186915888	0.0691588785047	0.0228640192539	0.0130841121495	0.0023768366465
FBgn0011760	0.0325814536341	0.015873015873	0.0401869158879	0.0392648287385	0.0140186915888	0.0691588785047	0.0651629072682	0.0130841121495	0.0023768366465
FBgn0029818	0.00282007896221	0.00112803158488	0.00630733944954	0.00338409475465	0.00286697247706	0.00974770642202	0.00507614213198	0.00172018348624	0.0023768366465
FBgn0029810	0.0198555956679	0.00180505415162	0.00715071507151	0.00361010830325	0.0	0.00715071507151	0.0228640192539	0.001100110011	0.0023768366465
FBgn0029812	0.0198555956679	0.00180505415162	0.00715071507151	0.00361010830325	0.0	0.00715071507151	0.0228640192539	0.001100110011	0.0023768366465
FBgn0029814	0.0198555956679	0.00180505415162	0.00715071507151	0.00361010830325	0.0	0.00715071507151	0.0228640192539	0.001100110011	0.0023768366465
FBgn0029816	0.0198555956679	0.00180505415162	0.00715071507151	0.00361010830325	0.0	0.00715071507151	0.0228640192539	0.001100110011	0.0023768366465
FBgn0051169	0.0325814536341	0.015873015873	0.0401869158879	0.0392648287385	0.0140186915888	0.0691588785047	0.0651629072682	0.0130841121495	0.0023768366465
FBgn0025864	0.00282007896221	0.00112803158488	0.00630733944954	0.00338409475465	0.00286697247706	0.00974770642202	0.00507614213198	0.00172018348624	0.0023768366465
FBgn0033273	0.0325814536341	0.015873015873	0.00715071507151	0.0392648287385	0.0	0.00715071507151	0.0651629072682	0.001100110011	0.0023768366465
FBgn0033272	0.00282007896221	0.00112803158488	0.00630733944954	0.00338409475465	0.00286697247706	0.00974770642202	0.00507614213198	0.00172018348624	0.0023768366465
FBgn0033271	0.0325814536341	0.015873015873	0.0401869158879	0.0392648287385	0.0140186915888	0.0691588785047	0.0651629072682	0.0130841121495	0.0023768366465
FBgn0033275	0.0198555956679	0.00180505415162	0.00715071507151	0.00361010830325	0.0	0.00715071507151	0.0228640192539	0.001100110011	0.0023768366465
FBgn0033279	0.0198555956679	0.00180505415162	0.00715071507151	0.00361010830325	0.0	0.00715071507151	0.0228640192539	0.001100110011	0.0023768366465
FBgn0034979	0.0198555956679	0.00180505415162	0.00715071507151	0.00361010830325	0.0	0.00715071507151	0.0228640192539	0.001100110011	0.0023768366465
FBgn0034978	0.0325814536341	0.015873015873	0.0401869158879	0.0392648287385	0.0140186915888	0.0691588785047	0.0651629072682	0.0130841121495	0.0023768366465
FBgn0034974	0.0325814536341	0.015873015873	0.0401869158879	0.0392648287385	0.0140186915888	0.0691588785047	0.0651629072682	0.0130841121495	0.0023768366465
FBgn0034970	0.00282007896221	0.00112803158488	0.00630733944954	0.00338409475465	0.00286697247706	0.00974770642202	0.00507614213198	0.00172018348624	0.0023768366465
FBgn0033627	0.0325814536341	0.015873015873	0.0401869158879	0.0392648287385	0.0140186915888	0.0691588785047	0.0651629072682	0.0130841121495	0.0023768366465
FBgn0038049	0.00282007896221	0.00112803158488	0.00630733944954	0.00338409475465	0.00286697247706	0.00974770642202	0.00507614213198	0.00172018348624	0.0023768366465
FBgn0034232	0.00282007896221	0.00112803158488	0.00630733944954	0.00338409475465	0.00286697247706	0.00974770642202	0.00507614213198	0.00172018348624	0.0023768366465
FBgn0038042	0.0325814536341	0.015873015873	0.0401869158879	0.0392648287385	0.0140186915888	0.0691588785047	0.0651629072682	0.0130841121495	0.0023768366465
FBgn0033017	0.00282007896221	0.00112803158488	0.0401869158879	0.00338409475465	0.0140186915888	0.0691588785047	0.00507614213198	0.0130841121495	0.0023768366465
FBgn0036534	0.00282007896221	0.00112803158488	0.00630733944954	0.00338409475465	0.00286697247706	0.00974770642202	0.00507614213198	0.00172018348624	0.0023768366465
FBgn0036533	0.00282007896221	0.00112803158488	0.00630733944954	0.00338409475465	0.00286697247706	0.00974770642202	0.00507614213198	0.00172018348624	0.0023768366465
FBgn0036020	0.00282007896221	0.00112803158488	0.00630733944954	0.00338409475465	0.00286697247706	0.00974770642202	0.00507614213198	0.00172018348624	0.0023768366465
FBgn0036023	0.0198555956679	0.00180505415162	0.00715071507151	0.00361010830325	0.0	0.00715071507151	0.0228640192539	0.001100110011	0.0023768366465
FBgn0033010	0.0325814536341	0.015873015873	0.0401869158879	0.0392648287385	0.0140186915888	0.0691588785047	0.0651629072682	0.0130841121495	0.0023768366465
FBgn0013469	0.0325814536341	0.015873015873	0.0401869158879	0.0392648287385	0.0140186915888	0.0691588785047	0.0651629072682	0.0130841121495	0.0023768366465
FBgn0033019	0.0325814536341	0.015873015873	0.0401869158879	0.0392648287385	0.0140186915888	0.0691588785047	0.0651629072682	0.0130841121495	0.0023768366465
FBgn0036538	0.0325814536341	0.015873015873	0.0401869158879	0.0392648287385	0.0140186915888	0.0691588785047	0.0651629072682	0.0130841121495	0.0023768366465
FBgn0015602	0.00282007896221	0.00112803158488	0.00630733944954	0.00338409475465	0.00286697247706	0.00974770642202	0.00507614213198	0.00172018348624	0.0023768366465
FBgn0015600	0.0325814536341	0.015873015873	0.00630733944954	0.0392648287385	0.00286697247706	0.00974770642202	0.0651629072682	0.00172018348624	0.0023768366465
FBgn0051782	0.00282007896221	0.00112803158488	0.00630733944954	0.00338409475465	0.00286697247706	0.00974770642202	0.00507614213198	0.00172018348624	0.0023768366465
FBgn0051781	0.0198555956679	0.00180505415162	0.00715071507151	0.00361010830325	0.0	0.00715071507151	0.0228640192539	0.001100110011	0.0023768366465
FBgn0001133	0.00282007896221	0.00112803158488	0.00630733944954	0.00338409475465	0.00286697247706	0.00974770642202	0.00507614213198	0.00172018348624	0.0023768366465
FBgn0002440	0.0198555956679	0.00180505415162	0.00715071507151	0.00361010830325	0.0	0.00715071507151	0.0228640192539	0.001100110011	0.0023768366465
FBgn0030243	0.00282007896221	0.00112803158488	0.00630733944954	0.00338409475465	0.00286697247706	0.00974770642202	0.00507614213198	0.00172018348624	0.0023768366465
FBgn0032217	0.00282007896221	0.00112803158488	0.00630733944954	0.00338409475465	0.00286697247706	0.00974770642202	0.00507614213198	0.00172018348624	0.0023768366465
FBgn0032635	0.00282007896221	0.00112803158488	0.00630733944954	0.00338409475465	0.00286697247706	0.00974770642202	0.00507614213198	0.00172018348624	0.0023768366465
FBgn0023417	0.0325814536341	0.015873015873	0.0401869158879	0.0392648287385	0.0140186915888	0.0691588785047	0.0651629072682	0.0130841121495	0.0023768366465
FBgn0024291	0.00282007896221	0.00112803158488	0.00630733944954	0.00338409475465	0.00286697247706	0.00974770642202	0.00507614213198	0.00172018348624	0.0023768366465
FBgn0024294	0.0198555956679	0.00180505415162	0.00715071507151	0.00361010830325	0.0	0.00715071507151	0.0228640192539	0.001100110011	0.0023768366465
FBgn0035944	0.00282007896221	0.00112803158488	0.00630733944954	0.00338409475465	0.00286697247706	0.00974770642202	0.00507614213198	0.00172018348624	0.0023768366465
FBgn0035941	0.0325814536341	0.015873015873	0.0401869158879	0.0392648287385	0.0140186915888	0.0691588785047	0.0651629072682	0.0130841121495	0.0023768366465
FBgn0028990	0.0325814536341	0.015873015873	0.0401869158879	0.0392648287385	0.0140186915888	0.0691588785047	0.0651629072682	0.0130841121495	0.0023768366465
FBgn0028999	0.0325814536341	0.015873015873	0.0401869158879	0.0392648287385	0.0140186915888	0.0691588785047	0.0651629072682	0.0130841121495	0.0023768366465
FBgn0033443	0.0198555956679	0.00180505415162	0.00715071507151	0.00361010830325	0.0	0.00715071507151	0.0228640192539	0.001100110011	0.0023768366465
FBgn0003249	0.0198555956679	0.00180505415162	0.00715071507151	0.00361010830325	0.0	0.00715071507151	0.0228640192539	0.001100110011	0.0023768366465
FBgn0003248	0.0198555956679	0.00180505415162	0.00715071507151	0.00361010830325	0.0	0.00715071507151	0.0228640192539	0.001100110011	0.0023768366465
FBgn0037816	0.00282007896221	0.00112803158488	0.00630733944954	0.00338409475465	0.00286697247706	0.00974770642202	0.00507614213198	0.00172018348624	0.0023768366465
FBgn0037814	0.00282007896221	0.00112803158488	0.00630733944954	0.00338409475465	0.00286697247706	0.00974770642202	0.00507614213198	0.00172018348624	0.0023768366465
FBgn0034573	0.00282007896221	0.00112803158488	0.00630733944954	0.00338409475465	0.00286697247706	0.00974770642202	0.00507614213198	0.00172018348624	0.0023768366465
FBgn0003429	0.0198555956679	0.00180505415162	0.00715071507151	0.00361010830325	0.0	0.00715071507151	0.0228640192539	0.001100110011	0.0023768366465
FBgn0042710	0.0198555956679	0.00180505415162	0.00715071507151	0.00361010830325	0.0	0.00715071507151	0.0228640192539	0.001100110011	0.0023768366465
FBgn0031500	0.00282007896221	0.00112803158488	0.00630733944954	0.00338409475465	0.00286697247706	0.00974770642202	0.00507614213198	0.00172018348624	0.0023768366465
FBgn0031059	0.00282007896221	0.00112803158488	0.00630733944954	0.00338409475465	0.00286697247706	0.00974770642202	0.00507614213198	0.00172018348624	0.0023768366465
FBgn0028689	0.00282007896221	0.00112803158488	0.00630733944954	0.00338409475465	0.00286697247706	0.00974770642202	0.00507614213198	0.00172018348624	0.0023768366465
FBgn0035360	0.0325814536341	0.015873015873	0.00715071507151	0.0392648287385	0.0	0.00715071507151	0.0651629072682	0.001100110011	0.0023768366465
FBgn0034758	0.0325814536341	0.015873015873	0.0401869158879	0.0392648287385	0.0140186915888	0.0691588785047	0.0651629072682	0.0130841121495	0.0023768366465
FBgn0031057	0.00282007896221	0.00112803158488	0.00630733944954	0.00338409475465	0.00286697247706	0.00974770642202	0.00507614213198	0.00172018348624	0.0023768366465
FBgn0016726	0.00282007896221	0.00112803158488	0.00630733944954	0.00338409475465	0.00286697247706	0.00974770642202	0.00507614213198	0.00172018348624	0.0023768366465
FBgn0030589	0.0198555956679	0.00180505415162	0.00715071507151	0.00361010830325	0.0	0.00715071507151	0.0228640192539	0.001100110011	0.0023768366465
FBgn0030706	0.0198555956679	0.00180505415162	0.00715071507151	0.00361010830325	0.0	0.00715071507151	0.0228640192539	0.001100110011	0.0023768366465
FBgn0028693	0.00282007896221	0.00112803158488	0.00630733944954	0.00338409475465	0.00286697247706	0.00974770642202	0.00507614213198	0.00172018348624	0.0023768366465
FBgn0037430	0.0198555956679	0.00180505415162	0.00715071507151	0.00361010830325	0.0	0.00715071507151	0.0228640192539	0.001100110011	0.0023768366465
FBgn0030219	0.0198555956679	0.00180505415162	0.00715071507151	0.00361010830325	0.0	0.00715071507151	0.0228640192539	0.001100110011	0.0023768366465
FBgn0034709	0.0325814536341	0.015873015873	0.00715071507151	0.0392648287385	0.0	0.00715071507151	0.0651629072682	0.001100110011	0.0023768366465
FBgn0034703	0.00282007896221	0.00112803158488	0.00630733944954	0.00338409475465	0.00286697247706	0.00974770642202	0.00507614213198	0.00172018348624	0.0023768366465
FBgn0034706	0.0325814536341	0.015873015873	0.0401869158879	0.0392648287385	0.0140186915888	0.0691588785047	0.0651629072682	0.0130841121495	0.0023768366465
FBgn0034707	0.00282007896221	0.00112803158488	0.00630733944954	0.00338409475465	0.00286697247706	0.00974770642202	0.00507614213198	0.00172018348624	0.0023768366465
FBgn0038678	0.00282007896221	0.00112803158488	0.00630733944954	0.00338409475465	0.00286697247706	0.00974770642202	0.00507614213198	0.00172018348624	0.0023768366465
FBgn0038679	0.0198555956679	0.00180505415162	0.00715071507151	0.00361010830325	0.0	0.00715071507151	0.0228640192539	0.001100110011	0.0023768366465
FBgn0038672	0.00282007896221	0.00112803158488	0.00630733944954	0.00338409475465	0.00286697247706	0.00974770642202	0.00507614213198	0.00172018348624	0.0023768366465
FBgn0038675	0.00282007896221	0.00112803158488	0.00630733944954	0.00338409475465	0.00286697247706	0.00974770642202	0.00507614213198	0.00172018348624	0.0023768366465
FBgn0030469	0.0325814536341	0.015873015873	0.0401869158879	0.0392648287385	0.0140186915888	0.0691588785047	0.0651629072682	0.0130841121495	0.0023768366465
FBgn0052207	0.0325814536341	0.015873015873	0.0401869158879	0.0392648287385	0.0140186915888	0.0691588785047	0.0651629072682	0.0130841121495	0.0023768366465
FBgn0052205	0.0325814536341	0.015873015873	0.0401869158879	0.0392648287385	0.0140186915888	0.0691588785047	0.0651629072682	0.0130841121495	0.0023768366465
FBgn0036856	0.00282007896221	0.00112803158488	0.00630733944954	0.00338409475465	0.00286697247706	0.00974770642202	0.00507614213198	0.00172018348624	0.0023768366465
FBgn0036857	0.0198555956679	0.00180505415162	0.00715071507151	0.00361010830325	0.0	0.00715071507151	0.0228640192539	0.001100110011	0.0023768366465
FBgn0030456	0.00282007896221	0.00112803158488	0.00630733944954	0.00338409475465	0.00286697247706	0.00974770642202	0.00507614213198	0.00172018348624	0.0023768366465
FBgn0034567	0.0325814536341	0.015873015873	0.00715071507151	0.0392648287385	0.0	0.00715071507151	0.0651629072682	0.001100110011	0.0023768366465
FBgn0040653	0.0198555956679	0.00180505415162	0.00715071507151	0.00361010830325	0.0	0.00715071507151	0.0228640192539	0.001100110011	0.0023768366465
FBgn0031188	0.00282007896221	0.00112803158488	0.0401869158879	0.00338409475465	0.0140186915888	0.0691588785047	0.00507614213198	0.0130841121495	0.0023768366465
FBgn0010391	0.0325814536341	0.015873015873	0.0401869158879	0.0392648287385	0.0140186915888	0.0691588785047	0.0651629072682	0.0130841121495	0.0023768366465
FBgn0010397	0.0325814536341	0.015873015873	0.00715071507151	0.0392648287385	0.0	0.00715071507151	0.0651629072682	0.001100110011	0.0023768366465
FBgn0010395	0.0325814536341	0.015873015873	0.0401869158879	0.0392648287385	0.0140186915888	0.0691588785047	0.0651629072682	0.0130841121495	0.0023768366465
FBgn0010399	0.0198555956679	0.00180505415162	0.00715071507151	0.00361010830325	0.0	0.00715071507151	0.0228640192539	0.001100110011	0.0023768366465
FBgn0010398	0.00282007896221	0.00112803158488	0.00630733944954	0.00338409475465	0.00286697247706	0.00974770642202	0.00507614213198	0.00172018348624	0.0023768366465
FBgn0051313	0.0198555956679	0.00180505415162	0.00715071507151	0.00361010830325	0.0	0.00715071507151	0.0228640192539	0.001100110011	0.0023768366465
FBgn0030280	0.0198555956679	0.00180505415162	0.00715071507151	0.00361010830325	0.0	0.00715071507151	0.0228640192539	0.001100110011	0.0023768366465
FBgn0039503	0.0198555956679	0.00180505415162	0.0401869158879	0.00361010830325	0.0140186915888	0.0691588785047	0.0228640192539	0.0130841121495	0.0023768366465
FBgn0039501	0.0198555956679	0.00180505415162	0.00715071507151	0.00361010830325	0.0	0.00715071507151	0.0228640192539	0.001100110011	0.0023768366465
FBgn0039505	0.00282007896221	0.00112803158488	0.00630733944954	0.00338409475465	0.00286697247706	0.00974770642202	0.00507614213198	0.00172018348624	0.0023768366465
FBgn0036703	0.0198555956679	0.00180505415162	0.00715071507151	0.00361010830325	0.0	0.00715071507151	0.0228640192539	0.001100110011	0.0023768366465
FBgn0032021	0.0198555956679	0.00180505415162	0.00715071507151	0.00361010830325	0.0	0.00715071507151	0.0228640192539	0.001100110011	0.0023768366465
FBgn0032022	0.0325814536341	0.015873015873	0.00715071507151	0.0392648287385	0.0	0.00715071507151	0.0651629072682	0.001100110011	0.0023768366465
FBgn0032025	0.0198555956679	0.00180505415162	0.00715071507151	0.00361010830325	0.0	0.00715071507151	0.0228640192539	0.001100110011	0.0023768366465
FBgn0037038	0.0198555956679	0.00180505415162	0.00715071507151	0.00361010830325	0.0	0.00715071507151	0.0228640192539	0.001100110011	0.0023768366465
FBgn0037035	0.0198555956679	0.00180505415162	0.00715071507151	0.00361010830325	0.0	0.00715071507151	0.0228640192539	0.001100110011	0.0023768366465
FBgn0037031	0.0325814536341	0.015873015873	0.00630733944954	0.0392648287385	0.00286697247706	0.00974770642202	0.0651629072682	0.00172018348624	0.0023768366465
FBgn0037736	0.0325814536341	0.015873015873	0.0401869158879	0.0392648287385	0.0140186915888	0.0691588785047	0.0651629072682	0.0130841121495	0.0023768366465
FBgn0032285	0.0198555956679	0.00180505415162	0.00715071507151	0.00361010830325	0.0	0.00715071507151	0.0228640192539	0.001100110011	0.0023768366465
FBgn0032287	0.0325814536341	0.015873015873	0.0401869158879	0.0392648287385	0.0140186915888	0.0691588785047	0.0651629072682	0.0130841121495	0.0023768366465
FBgn0032286	0.0198555956679	0.00180505415162	0.00715071507151	0.00361010830325	0.0	0.00715071507151	0.0228640192539	0.001100110011	0.0023768366465
FBgn0032281	0.0198555956679	0.00180505415162	0.00715071507151	0.00361010830325	0.0	0.00715071507151	0.0228640192539	0.001100110011	0.0023768366465
FBgn0032282	0.0198555956679	0.00180505415162	0.00715071507151	0.00361010830325	0.0	0.00715071507151	0.0228640192539	0.001100110011	0.0023768366465
FBgn0001301	0.00282007896221	0.00112803158488	0.00630733944954	0.00338409475465	0.00286697247706	0.00974770642202	0.00507614213198	0.00172018348624	0.0023768366465
FBgn0050043	0.0198555956679	0.00180505415162	0.00715071507151	0.00361010830325	0.0	0.00715071507151	0.0228640192539	0.001100110011	0.0023768366465
FBgn0050046	0.0198555956679	0.00180505415162	0.00715071507151	0.00361010830325	0.0	0.00715071507151	0.0228640192539	0.001100110011	0.0023768366465
FBgn0033480	0.00282007896221	0.00112803158488	0.00630733944954	0.00338409475465	0.00286697247706	0.00974770642202	0.00507614213198	0.00172018348624	0.0023768366465
FBgn0033481	0.0325814536341	0.015873015873	0.0401869158879	0.0392648287385	0.0140186915888	0.0691588785047	0.0651629072682	0.0130841121495	0.0023768366465
FBgn0033483	0.0325814536341	0.015873015873	0.0401869158879	0.0392648287385	0.0140186915888	0.0691588785047	0.0651629072682	0.0130841121495	0.0023768366465
FBgn0051522	0.0325814536341	0.015873015873	0.00630733944954	0.0392648287385	0.00286697247706	0.00974770642202	0.0651629072682	0.00172018348624	0.0023768366465
FBgn0038876	0.00282007896221	0.00112803158488	0.00630733944954	0.00338409475465	0.00286697247706	0.00974770642202	0.00507614213198	0.00172018348624	0.0023768366465
FBgn0038879	0.0198555956679	0.00180505415162	0.00715071507151	0.00361010830325	0.0	0.00715071507151	0.0228640192539	0.001100110011	0.0023768366465
FBgn0035889	0.00282007896221	0.00112803158488	0.00630733944954	0.00338409475465	0.00286697247706	0.00974770642202	0.00507614213198	0.00172018348624	0.0023768366465
FBgn0033736	0.0198555956679	0.00180505415162	0.00715071507151	0.00361010830325	0.0	0.00715071507151	0.0228640192539	0.001100110011	0.0023768366465
FBgn0033734	0.0325814536341	0.015873015873	0.0401869158879	0.0392648287385	0.0140186915888	0.0691588785047	0.0651629072682	0.0130841121495	0.0023768366465
FBgn0028563	0.0325814536341	0.015873015873	0.0401869158879	0.0392648287385	0.0140186915888	0.0691588785047	0.0651629072682	0.0130841121495	0.0023768366465
FBgn0028560	0.0198555956679	0.00180505415162	0.00715071507151	0.00361010830325	0.0	0.00715071507151	0.0228640192539	0.001100110011	0.0023768366465
FBgn0035088	0.00282007896221	0.00112803158488	0.00630733944954	0.00338409475465	0.00286697247706	0.00974770642202	0.00507614213198	0.00172018348624	0.0023768366465
FBgn0035089	0.0198555956679	0.00180505415162	0.0401869158879	0.00361010830325	0.0140186915888	0.0691588785047	0.0228640192539	0.0130841121495	0.0023768366465
FBgn0035082	0.0325814536341	0.015873015873	0.0401869158879	0.0392648287385	0.0140186915888	0.0691588785047	0.0651629072682	0.0130841121495	0.0023768366465
FBgn0035087	0.00282007896221	0.00112803158488	0.00630733944954	0.00338409475465	0.00286697247706	0.00974770642202	0.00507614213198	0.00172018348624	0.0023768366465
FBgn0035084	0.0198555956679	0.00180505415162	0.0401869158879	0.00361010830325	0.0140186915888	0.0691588785047	0.0228640192539	0.0130841121495	0.0023768366465
FBgn0035776	0.0198555956679	0.00180505415162	0.00715071507151	0.00361010830325	0.0	0.00715071507151	0.0228640192539	0.001100110011	0.0023768366465
FBgn0035772	0.00282007896221	0.00112803158488	0.00630733944954	0.00338409475465	0.00286697247706	0.00974770642202	0.00507614213198	0.00172018348624	0.0023768366465
FBgn0003655	0.0325814536341	0.015873015873	0.0401869158879	0.0392648287385	0.0140186915888	0.0691588785047	0.0651629072682	0.0130841121495	0.0023768366465
FBgn0003651	0.0198555956679	0.00180505415162	0.0401869158879	0.00361010830325	0.0140186915888	0.0691588785047	0.0228640192539	0.0130841121495	0.0023768366465
FBgn0031987	0.00282007896221	0.00112803158488	0.00630733944954	0.00338409475465	0.00286697247706	0.00974770642202	0.00507614213198	0.00172018348624	0.0023768366465
FBgn0052442	0.0325814536341	0.015873015873	0.0401869158879	0.0392648287385	0.0140186915888	0.0691588785047	0.0651629072682	0.0130841121495	0.0023768366465
FBgn0052564	0.0198555956679	0.00180505415162	0.00715071507151	0.00361010830325	0.0	0.00715071507151	0.0228640192539	0.001100110011	0.0023768366465
FBgn0028381	0.0198555956679	0.00180505415162	0.00715071507151	0.00361010830325	0.0	0.00715071507151	0.0228640192539	0.001100110011	0.0023768366465
FBgn0028387	0.00282007896221	0.00112803158488	0.00630733944954	0.00338409475465	0.00286697247706	0.00974770642202	0.00507614213198	0.00172018348624	0.0023768366465
FBgn0029167	0.0198555956679	0.00180505415162	0.00715071507151	0.00361010830325	0.0	0.00715071507151	0.0228640192539	0.001100110011	0.0023768366465
FBgn0031988	0.00282007896221	0.00112803158488	0.00630733944954	0.00338409475465	0.00286697247706	0.00974770642202	0.00507614213198	0.00172018348624	0.0023768366465
FBgn0033665	0.0325814536341	0.015873015873	0.00630733944954	0.0392648287385	0.00286697247706	0.00974770642202	0.0651629072682	0.00172018348624	0.0023768366465
FBgn0039084	0.0198555956679	0.00180505415162	0.00715071507151	0.00361010830325	0.0	0.00715071507151	0.0228640192539	0.001100110011	0.0023768366465
FBgn0039085	0.0198555956679	0.00180505415162	0.00715071507151	0.00361010830325	0.0	0.00715071507151	0.0228640192539	0.001100110011	0.0023768366465
FBgn0039081	0.0198555956679	0.00180505415162	0.00715071507151	0.00361010830325	0.0	0.00715071507151	0.0228640192539	0.001100110011	0.0023768366465
FBgn0031700	0.0198555956679	0.00180505415162	0.00715071507151	0.00361010830325	0.0	0.00715071507151	0.0228640192539	0.001100110011	0.0023768366465
FBgn0031251	0.0325814536341	0.015873015873	0.00715071507151	0.0392648287385	0.0	0.00715071507151	0.0651629072682	0.001100110011	0.0023768366465
FBgn0031702	0.0325814536341	0.015873015873	0.00715071507151	0.0392648287385	0.0	0.00715071507151	0.0651629072682	0.001100110011	0.0023768366465
FBgn0031257	0.0325814536341	0.015873015873	0.0401869158879	0.0392648287385	0.0140186915888	0.0691588785047	0.0651629072682	0.0130841121495	0.0023768366465
FBgn0031256	0.00282007896221	0.00112803158488	0.00630733944954	0.00338409475465	0.00286697247706	0.00974770642202	0.00507614213198	0.00172018348624	0.0023768366465
FBgn0031708	0.00282007896221	0.00112803158488	0.00630733944954	0.00338409475465	0.00286697247706	0.00974770642202	0.00507614213198	0.00172018348624	0.0023768366465
FBgn0010410	0.00282007896221	0.00112803158488	0.00630733944954	0.00338409475465	0.00286697247706	0.00974770642202	0.00507614213198	0.00172018348624	0.0023768366465
FBgn0031258	0.0198555956679	0.00180505415162	0.00715071507151	0.00361010830325	0.0	0.00715071507151	0.0228640192539	0.001100110011	0.0023768366465
FBgn0000229	0.00282007896221	0.00112803158488	0.00630733944954	0.00338409475465	0.00286697247706	0.00974770642202	0.00507614213198	0.00172018348624	0.0023768366465
FBgn0030078	0.0198555956679	0.00180505415162	0.00715071507151	0.00361010830325	0.0	0.00715071507151	0.0228640192539	0.001100110011	0.0023768366465
FBgn0000227	0.0198555956679	0.00180505415162	0.00715071507151	0.00361010830325	0.0	0.00715071507151	0.0228640192539	0.001100110011	0.0023768366465
FBgn0028665	0.00282007896221	0.00112803158488	0.00630733944954	0.00338409475465	0.00286697247706	0.00974770642202	0.00507614213198	0.00172018348624	0.0023768366465
FBgn0030612	0.00282007896221	0.00112803158488	0.00630733944954	0.00338409475465	0.00286697247706	0.00974770642202	0.00507614213198	0.00172018348624	0.0023768366465
FBgn0030619	0.0198555956679	0.00180505415162	0.00715071507151	0.00361010830325	0.0	0.00715071507151	0.0228640192539	0.001100110011	0.0023768366465
FBgn0011701	0.0198555956679	0.00180505415162	0.0401869158879	0.00361010830325	0.0140186915888	0.0691588785047	0.0228640192539	0.0130841121495	0.0023768366465
FBgn0029833	0.00282007896221	0.00112803158488	0.00630733944954	0.00338409475465	0.00286697247706	0.00974770642202	0.00507614213198	0.00172018348624	0.0023768366465
FBgn0029831	0.0325814536341	0.015873015873	0.00715071507151	0.0392648287385	0.0	0.00715071507151	0.0651629072682	0.001100110011	0.0023768366465
FBgn0029836	0.0198555956679	0.00180505415162	0.00715071507151	0.00361010830325	0.0	0.00715071507151	0.0228640192539	0.001100110011	0.0023768366465
FBgn0029838	0.0198555956679	0.00180505415162	0.00715071507151	0.00361010830325	0.0	0.00715071507151	0.0228640192539	0.001100110011	0.0023768366465
FBgn0029839	0.0198555956679	0.00180505415162	0.00715071507151	0.00361010830325	0.0	0.00715071507151	0.0228640192539	0.001100110011	0.0023768366465
FBgn0035547	0.0198555956679	0.00180505415162	0.00715071507151	0.00361010830325	0.0	0.00715071507151	0.0228640192539	0.001100110011	0.0023768366465
FBgn0051145	0.0325814536341	0.015873015873	0.00715071507151	0.0392648287385	0.0	0.00715071507151	0.0651629072682	0.001100110011	0.0023768366465
FBgn0051146	0.0325814536341	0.015873015873	0.00715071507151	0.0392648287385	0.0	0.00715071507151	0.0651629072682	0.001100110011	0.0023768366465
FBgn0033257	0.0198555956679	0.00180505415162	0.00715071507151	0.00361010830325	0.0	0.00715071507151	0.0228640192539	0.001100110011	0.0023768366465
FBgn0033250	0.0198555956679	0.00180505415162	0.00715071507151	0.00361010830325	0.0	0.00715071507151	0.0228640192539	0.001100110011	0.0023768366465
FBgn0010424	0.0325814536341	0.015873015873	0.00715071507151	0.0392648287385	0.0	0.00715071507151	0.0651629072682	0.001100110011	0.0023768366465
FBgn0033259	0.00282007896221	0.00112803158488	0.00630733944954	0.00338409475465	0.00286697247706	0.00974770642202	0.00507614213198	0.00172018348624	0.0023768366465
FBgn0033258	0.00282007896221	0.00112803158488	0.00630733944954	0.00338409475465	0.00286697247706	0.00974770642202	0.00507614213198	0.00172018348624	0.0023768366465
FBgn0034913	0.00282007896221	0.00112803158488	0.00630733944954	0.00338409475465	0.00286697247706	0.00974770642202	0.00507614213198	0.00172018348624	0.0023768366465
FBgn0035545	0.0198555956679	0.00180505415162	0.00715071507151	0.00361010830325	0.0	0.00715071507151	0.0228640192539	0.001100110011	0.0023768366465
FBgn0037222	0.0198555956679	0.00180505415162	0.00715071507151	0.00361010830325	0.0	0.00715071507151	0.0228640192539	0.001100110011	0.0023768366465
FBgn0034919	0.00282007896221	0.00112803158488	0.00630733944954	0.00338409475465	0.00286697247706	0.00974770642202	0.00507614213198	0.00172018348624	0.0023768366465
FBgn0034918	0.00282007896221	0.00112803158488	0.00630733944954	0.00338409475465	0.00286697247706	0.00974770642202	0.00507614213198	0.00172018348624	0.0023768366465
FBgn0038029	0.0198555956679	0.00180505415162	0.0401869158879	0.00361010830325	0.0140186915888	0.0691588785047	0.0228640192539	0.0130841121495	0.0023768366465
FBgn0033031	0.0325814536341	0.015873015873	0.00715071507151	0.0392648287385	0.0	0.00715071507151	0.0651629072682	0.001100110011	0.0023768366465
FBgn0033033	0.0198555956679	0.00180505415162	0.00715071507151	0.00361010830325	0.0	0.00715071507151	0.0228640192539	0.001100110011	0.0023768366465
FBgn0033032	0.00282007896221	0.00112803158488	0.00630733944954	0.00338409475465	0.00286697247706	0.00974770642202	0.00507614213198	0.00172018348624	0.0023768366465
FBgn0036514	0.00282007896221	0.00112803158488	0.00630733944954	0.00338409475465	0.00286697247706	0.00974770642202	0.00507614213198	0.00172018348624	0.0023768366465
FBgn0015663	0.0325814536341	0.015873015873	0.0401869158879	0.0392648287385	0.0140186915888	0.0691588785047	0.0651629072682	0.0130841121495	0.0023768366465
FBgn0034247	0.0198555956679	0.00180505415162	0.0401869158879	0.00361010830325	0.0140186915888	0.0691588785047	0.0228640192539	0.0130841121495	0.0023768366465
FBgn0014396	0.0198555956679	0.00180505415162	0.00715071507151	0.00361010830325	0.0	0.00715071507151	0.0228640192539	0.001100110011	0.0023768366465
FBgn0031792	0.0198555956679	0.00180505415162	0.00715071507151	0.00361010830325	0.0	0.00715071507151	0.0228640192539	0.001100110011	0.0023768366465
FBgn0023388	0.00282007896221	0.00112803158488	0.00630733944954	0.00338409475465	0.00286697247706	0.00974770642202	0.00507614213198	0.00172018348624	0.0023768366465
FBgn0039860	0.00282007896221	0.00112803158488	0.00630733944954	0.00338409475465	0.00286697247706	0.00974770642202	0.00507614213198	0.00172018348624	0.0023768366465
FBgn0032345	0.0198555956679	0.00180505415162	0.0401869158879	0.00361010830325	0.0140186915888	0.0691588785047	0.0228640192539	0.0130841121495	0.0023768366465
FBgn0033905	0.0325814536341	0.015873015873	0.0401869158879	0.0392648287385	0.0140186915888	0.0691588785047	0.0651629072682	0.0130841121495	0.0023768366465
FBgn0035967	0.0198555956679	0.00180505415162	0.00715071507151	0.00361010830325	0.0	0.00715071507151	0.0228640192539	0.001100110011	0.0023768366465
FBgn0035966	0.0325814536341	0.015873015873	0.00715071507151	0.0392648287385	0.0	0.00715071507151	0.0651629072682	0.001100110011	0.0023768366465
FBgn0035969	0.0198555956679	0.00180505415162	0.00715071507151	0.00361010830325	0.0	0.00715071507151	0.0228640192539	0.001100110011	0.0023768366465
FBgn0036436	0.0198555956679	0.00180505415162	0.00715071507151	0.00361010830325	0.0	0.00715071507151	0.0228640192539	0.001100110011	0.0023768366465
FBgn0031318	0.00282007896221	0.00112803158488	0.00630733944954	0.00338409475465	0.00286697247706	0.00974770642202	0.00507614213198	0.00172018348624	0.0023768366465
FBgn0035621	0.0198555956679	0.00180505415162	0.00715071507151	0.00361010830325	0.0	0.00715071507151	0.0228640192539	0.001100110011	0.0023768366465
FBgn0052048	0.0325814536341	0.015873015873	0.0401869158879	0.0392648287385	0.0140186915888	0.0691588785047	0.0651629072682	0.0130841121495	0.0023768366465
FBgn0037835	0.0325814536341	0.015873015873	0.0401869158879	0.0392648287385	0.0140186915888	0.0691588785047	0.0651629072682	0.0130841121495	0.0023768366465
FBgn0037834	0.00282007896221	0.00112803158488	0.00630733944954	0.00338409475465	0.00286697247706	0.00974770642202	0.00507614213198	0.00172018348624	0.0023768366465
FBgn0037837	0.0325814536341	0.015873015873	0.0401869158879	0.0392648287385	0.0140186915888	0.0691588785047	0.0651629072682	0.0130841121495	0.0023768366465
FBgn0037839	0.0198555956679	0.00180505415162	0.00715071507151	0.00361010830325	0.0	0.00715071507151	0.0228640192539	0.001100110011	0.0023768366465
FBgn0037838	0.00282007896221	0.00112803158488	0.0401869158879	0.00338409475465	0.0140186915888	0.0691588785047	0.00507614213198	0.0130841121495	0.0023768366465
FBgn0033582	0.0325814536341	0.015873015873	0.0401869158879	0.0392648287385	0.0140186915888	0.0691588785047	0.0651629072682	0.0130841121495	0.0023768366465
FBgn0033584	0.0325814536341	0.015873015873	0.00715071507151	0.0392648287385	0.0	0.00715071507151	0.0651629072682	0.001100110011	0.0023768366465
FBgn0036752	0.0325814536341	0.015873015873	0.0401869158879	0.0392648287385	0.0140186915888	0.0691588785047	0.0651629072682	0.0130841121495	0.0023768366465
FBgn0024811	0.00282007896221	0.00112803158488	0.00630733944954	0.00338409475465	0.00286697247706	0.00974770642202	0.00507614213198	0.00172018348624	0.0023768366465
FBgn0035344	0.0198555956679	0.00180505415162	0.00715071507151	0.00361010830325	0.0	0.00715071507151	0.0228640192539	0.001100110011	0.0023768366465
FBgn0035346	0.0325814536341	0.015873015873	0.0401869158879	0.0392648287385	0.0140186915888	0.0691588785047	0.0651629072682	0.0130841121495	0.0023768366465
FBgn0035343	0.0198555956679	0.00180505415162	0.00715071507151	0.00361010830325	0.0	0.00715071507151	0.0228640192539	0.001100110011	0.0023768366465
FBgn0052190	0.00282007896221	0.00112803158488	0.00630733944954	0.00338409475465	0.00286697247706	0.00974770642202	0.00507614213198	0.00172018348624	0.0023768366465
FBgn0031068	0.00282007896221	0.00112803158488	0.00630733944954	0.00338409475465	0.00286697247706	0.00974770642202	0.00507614213198	0.00172018348624	0.0023768366465
FBgn0031065	0.0198555956679	0.00180505415162	0.0401869158879	0.00361010830325	0.0140186915888	0.0691588785047	0.0228640192539	0.0130841121495	0.0023768366465
FBgn0038610	0.0325814536341	0.015873015873	0.0401869158879	0.0392648287385	0.0140186915888	0.0691588785047	0.0651629072682	0.0130841121495	0.0023768366465
FBgn0038611	0.0198555956679	0.00180505415162	0.00715071507151	0.00361010830325	0.0	0.00715071507151	0.0228640192539	0.001100110011	0.0023768366465
FBgn0038613	0.0198555956679	0.00180505415162	0.00715071507151	0.00361010830325	0.0	0.00715071507151	0.0228640192539	0.001100110011	0.0023768366465
FBgn0010453	0.0325814536341	0.015873015873	0.0401869158879	0.0392648287385	0.0140186915888	0.0691588785047	0.0651629072682	0.0130841121495	0.0023768366465
FBgn0036876	0.0198555956679	0.00180505415162	0.00715071507151	0.00361010830325	0.0	0.00715071507151	0.0228640192539	0.001100110011	0.0023768366465
FBgn0052220	0.0198555956679	0.00180505415162	0.00715071507151	0.00361010830325	0.0	0.00715071507151	0.0228640192539	0.001100110011	0.0023768366465
FBgn0037254	0.0198555956679	0.00180505415162	0.00715071507151	0.00361010830325	0.0	0.00715071507151	0.0228640192539	0.001100110011	0.0023768366465
FBgn0011576	0.0198555956679	0.00180505415162	0.00715071507151	0.00361010830325	0.0	0.00715071507151	0.0228640192539	0.001100110011	0.0023768366465
FBgn0011571	0.00282007896221	0.00112803158488	0.00630733944954	0.00338409475465	0.00286697247706	0.00974770642202	0.00507614213198	0.00172018348624	0.0023768366465
FBgn0016700	0.00282007896221	0.00112803158488	0.00630733944954	0.00338409475465	0.00286697247706	0.00974770642202	0.00507614213198	0.00172018348624	0.0023768366465
FBgn0010620	0.0325814536341	0.015873015873	0.0401869158879	0.0392648287385	0.0140186915888	0.0691588785047	0.0651629072682	0.0130841121495	0.0023768366465
FBgn0034585	0.00282007896221	0.00112803158488	0.00630733944954	0.00338409475465	0.00286697247706	0.00974770642202	0.00507614213198	0.00172018348624	0.0023768366465
FBgn0051088	0.0198555956679	0.00180505415162	0.00715071507151	0.00361010830325	0.0	0.00715071507151	0.0228640192539	0.001100110011	0.0023768366465
FBgn0039691	0.00282007896221	0.00112803158488	0.00630733944954	0.00338409475465	0.00286697247706	0.00974770642202	0.00507614213198	0.00172018348624	0.0023768366465
FBgn0039690	0.0325814536341	0.015873015873	0.0401869158879	0.0392648287385	0.0140186915888	0.0691588785047	0.0651629072682	0.0130841121495	0.0023768366465
FBgn0039694	0.0198555956679	0.00180505415162	0.00715071507151	0.00361010830325	0.0	0.00715071507151	0.0228640192539	0.001100110011	0.0023768366465
FBgn0021944	0.00282007896221	0.00112803158488	0.00630733944954	0.00338409475465	0.00286697247706	0.00974770642202	0.00507614213198	0.00172018348624	0.0023768366465
FBgn0051337	0.0198555956679	0.00180505415162	0.00715071507151	0.00361010830325	0.0	0.00715071507151	0.0228640192539	0.001100110011	0.0023768366465
FBgn0037233	0.0325814536341	0.015873015873	0.0401869158879	0.0392648287385	0.0140186915888	0.0691588785047	0.0651629072682	0.0130841121495	0.0023768366465
FBgn0037230	0.0198555956679	0.00180505415162	0.00715071507151	0.00361010830325	0.0	0.00715071507151	0.0228640192539	0.001100110011	0.0023768366465
FBgn0037235	0.00282007896221	0.00112803158488	0.00630733944954	0.00338409475465	0.00286697247706	0.00974770642202	0.00507614213198	0.00172018348624	0.0023768366465
FBgn0030914	0.0198555956679	0.00180505415162	0.00715071507151	0.00361010830325	0.0	0.00715071507151	0.0228640192539	0.001100110011	0.0023768366465
FBgn0030918	0.0198555956679	0.00180505415162	0.00715071507151	0.00361010830325	0.0	0.00715071507151	0.0228640192539	0.001100110011	0.0023768366465
FBgn0037580	0.00282007896221	0.00112803158488	0.00630733944954	0.00338409475465	0.00286697247706	0.00974770642202	0.00507614213198	0.00172018348624	0.0023768366465
FBgn0000078	0.0198555956679	0.00180505415162	0.00715071507151	0.00361010830325	0.0	0.00715071507151	0.0228640192539	0.001100110011	0.0023768366465
FBgn0039529	0.0198555956679	0.00180505415162	0.00715071507151	0.00361010830325	0.0	0.00715071507151	0.0228640192539	0.001100110011	0.0023768366465
FBgn0036723	0.0198555956679	0.00180505415162	0.00715071507151	0.00361010830325	0.0	0.00715071507151	0.0228640192539	0.001100110011	0.0023768366465
FBgn0039525	0.0198555956679	0.00180505415162	0.00715071507151	0.00361010830325	0.0	0.00715071507151	0.0228640192539	0.001100110011	0.0023768366465
FBgn0033939	0.0198555956679	0.00180505415162	0.0401869158879	0.00361010830325	0.0140186915888	0.0691588785047	0.0228640192539	0.0130841121495	0.0023768366465
FBgn0037057	0.0325814536341	0.015873015873	0.0401869158879	0.0392648287385	0.0140186915888	0.0691588785047	0.0651629072682	0.0130841121495	0.0023768366465
FBgn0041102	0.0198555956679	0.00180505415162	0.0401869158879	0.00361010830325	0.0140186915888	0.0691588785047	0.0228640192539	0.0130841121495	0.0023768366465
FBgn0037050	0.0325814536341	0.015873015873	0.0401869158879	0.0392648287385	0.0140186915888	0.0691588785047	0.0651629072682	0.0130841121495	0.0023768366465
FBgn0050217	0.0198555956679	0.00180505415162	0.00715071507151	0.00361010830325	0.0	0.00715071507151	0.0228640192539	0.001100110011	0.0023768366465
FBgn0024315	0.0198555956679	0.00180505415162	0.00715071507151	0.00361010830325	0.0	0.00715071507151	0.0228640192539	0.001100110011	0.0023768366465
FBgn0004173	0.0198555956679	0.00180505415162	0.00715071507151	0.00361010830325	0.0	0.00715071507151	0.0228640192539	0.001100110011	0.0023768366465
FBgn0004177	0.00282007896221	0.00112803158488	0.00630733944954	0.00338409475465	0.00286697247706	0.00974770642202	0.00507614213198	0.00172018348624	0.0023768366465
FBgn0034552	0.0198555956679	0.00180505415162	0.00715071507151	0.00361010830325	0.0	0.00715071507151	0.0228640192539	0.001100110011	0.0023768366465
FBgn0036183	0.0325814536341	0.015873015873	0.0401869158879	0.0392648287385	0.0140186915888	0.0691588785047	0.0651629072682	0.0130841121495	0.0023768366465
FBgn0036180	0.00282007896221	0.00112803158488	0.00630733944954	0.00338409475465	0.00286697247706	0.00974770642202	0.00507614213198	0.00172018348624	0.0023768366465
FBgn0036186	0.0198555956679	0.00180505415162	0.00715071507151	0.00361010830325	0.0	0.00715071507151	0.0228640192539	0.001100110011	0.0023768366465
FBgn0036187	0.00282007896221	0.00112803158488	0.00630733944954	0.00338409475465	0.00286697247706	0.00974770642202	0.00507614213198	0.00172018348624	0.0023768366465
FBgn0036184	0.00282007896221	0.00112803158488	0.00630733944954	0.00338409475465	0.00286697247706	0.00974770642202	0.00507614213198	0.00172018348624	0.0023768366465
FBgn0036188	0.00282007896221	0.00112803158488	0.00630733944954	0.00338409475465	0.00286697247706	0.00974770642202	0.00507614213198	0.00172018348624	0.0023768366465
FBgn0038855	0.00282007896221	0.00112803158488	0.00630733944954	0.00338409475465	0.00286697247706	0.00974770642202	0.00507614213198	0.00172018348624	0.0023768366465
FBgn0033750	0.00282007896221	0.00112803158488	0.00630733944954	0.00338409475465	0.00286697247706	0.00974770642202	0.00507614213198	0.00172018348624	0.0023768366465
FBgn0028544	0.0198555956679	0.00180505415162	0.00715071507151	0.00361010830325	0.0	0.00715071507151	0.0228640192539	0.001100110011	0.0023768366465
FBgn0033752	0.00282007896221	0.00112803158488	0.00630733944954	0.00338409475465	0.00286697247706	0.00974770642202	0.00507614213198	0.00172018348624	0.0023768366465
FBgn0033970	0.0198555956679	0.00180505415162	0.00715071507151	0.00361010830325	0.0	0.00715071507151	0.0228640192539	0.001100110011	0.0023768366465
FBgn0039250	0.00282007896221	0.00112803158488	0.00630733944954	0.00338409475465	0.00286697247706	0.00974770642202	0.00507614213198	0.00172018348624	0.0023768366465
FBgn0038588	0.00282007896221	0.00112803158488	0.00630733944954	0.00338409475465	0.00286697247706	0.00974770642202	0.00507614213198	0.00172018348624	0.0023768366465
FBgn0038584	0.00282007896221	0.00112803158488	0.00630733944954	0.00338409475465	0.00286697247706	0.00974770642202	0.00507614213198	0.00172018348624	0.0023768366465
FBgn0038586	0.0325814536341	0.015873015873	0.0401869158879	0.0392648287385	0.0140186915888	0.0691588785047	0.0651629072682	0.0130841121495	0.0023768366465
FBgn0035752	0.00282007896221	0.00112803158488	0.00630733944954	0.00338409475465	0.00286697247706	0.00974770642202	0.00507614213198	0.00172018348624	0.0023768366465
FBgn0038581	0.0325814536341	0.015873015873	0.0401869158879	0.0392648287385	0.0140186915888	0.0691588785047	0.0651629072682	0.0130841121495	0.0023768366465
FBgn0002631	0.0198555956679	0.00180505415162	0.0401869158879	0.00361010830325	0.0140186915888	0.0691588785047	0.0228640192539	0.0130841121495	0.0023768366465
FBgn0052767	0.00282007896221	0.00112803158488	0.00630733944954	0.00338409475465	0.00286697247706	0.00974770642202	0.00507614213198	0.00172018348624	0.0023768366465
FBgn0002638	0.0325814536341	0.015873015873	0.00630733944954	0.0392648287385	0.00286697247706	0.00974770642202	0.0651629072682	0.00172018348624	0.0023768366465
FBgn0017429	0.00282007896221	0.00112803158488	0.00630733944954	0.00338409475465	0.00286697247706	0.00974770642202	0.00507614213198	0.00172018348624	0.0023768366465
FBgn0032409	0.00282007896221	0.00112803158488	0.00630733944954	0.00338409475465	0.00286697247706	0.00974770642202	0.00507614213198	0.00172018348624	0.0023768366465
FBgn0039328	0.0198555956679	0.00180505415162	0.00715071507151	0.00361010830325	0.0	0.00715071507151	0.0228640192539	0.001100110011	0.0023768366465
FBgn0032402	0.0325814536341	0.015873015873	0.0401869158879	0.0392648287385	0.0140186915888	0.0691588785047	0.0651629072682	0.0130841121495	0.0023768366465
FBgn0032401	0.00282007896221	0.00112803158488	0.00630733944954	0.00338409475465	0.00286697247706	0.00974770642202	0.00507614213198	0.00172018348624	0.0023768366465
FBgn0029147	0.0325814536341	0.015873015873	0.0401869158879	0.0392648287385	0.0140186915888	0.0691588785047	0.0651629072682	0.0130841121495	0.0023768366465
FBgn0029639	0.0198555956679	0.00180505415162	0.00715071507151	0.00361010830325	0.0	0.00715071507151	0.0228640192539	0.001100110011	0.0023768366465
FBgn0039066	0.00282007896221	0.00112803158488	0.00630733944954	0.00338409475465	0.00286697247706	0.00974770642202	0.00507614213198	0.00172018348624	0.0023768366465
FBgn0039067	0.00282007896221	0.00112803158488	0.00630733944954	0.00338409475465	0.00286697247706	0.00974770642202	0.00507614213198	0.00172018348624	0.0023768366465
FBgn0039068	0.00282007896221	0.00112803158488	0.00630733944954	0.00338409475465	0.00286697247706	0.00974770642202	0.00507614213198	0.00172018348624	0.0023768366465
FBgn0039069	0.0198555956679	0.00180505415162	0.00715071507151	0.00361010830325	0.0	0.00715071507151	0.0228640192539	0.001100110011	0.0023768366465
FBgn0042693	0.00282007896221	0.00112803158488	0.00630733944954	0.00338409475465	0.00286697247706	0.00974770642202	0.00507614213198	0.00172018348624	0.0023768366465
FBgn0031275	0.0198555956679	0.00180505415162	0.00715071507151	0.00361010830325	0.0	0.00715071507151	0.0228640192539	0.001100110011	0.0023768366465
FBgn0031279	0.0198555956679	0.00180505415162	0.00715071507151	0.00361010830325	0.0	0.00715071507151	0.0228640192539	0.001100110011	0.0023768366465
FBgn0001402	0.0198555956679	0.00180505415162	0.00715071507151	0.00361010830325	0.0	0.00715071507151	0.0228640192539	0.001100110011	0.0023768366465
FBgn0030584	0.00282007896221	0.00112803158488	0.00630733944954	0.00338409475465	0.00286697247706	0.00974770642202	0.00507614213198	0.00172018348624	0.0023768366465
FBgn0030586	0.0198555956679	0.00180505415162	0.00715071507151	0.00361010830325	0.0	0.00715071507151	0.0228640192539	0.001100110011	0.0023768366465
FBgn0030587	0.0198555956679	0.00180505415162	0.00715071507151	0.00361010830325	0.0	0.00715071507151	0.0228640192539	0.001100110011	0.0023768366465
FBgn0030581	0.0325814536341	0.015873015873	0.0401869158879	0.0392648287385	0.0140186915888	0.0691588785047	0.0651629072682	0.0130841121495	0.0023768366465
FBgn0000241	0.0198555956679	0.00180505415162	0.00715071507151	0.00361010830325	0.0	0.00715071507151	0.0228640192539	0.001100110011	0.0023768366465
FBgn0000242	0.0325814536341	0.015873015873	0.0401869158879	0.0392648287385	0.0140186915888	0.0691588785047	0.0651629072682	0.0130841121495	0.0023768366465
FBgn0031189	0.00282007896221	0.00112803158488	0.00630733944954	0.00338409475465	0.00286697247706	0.00974770642202	0.00507614213198	0.00172018348624	0.0023768366465
FBgn0031184	0.0325814536341	0.015873015873	0.0401869158879	0.0392648287385	0.0140186915888	0.0691588785047	0.0651629072682	0.0130841121495	0.0023768366465
FBgn0031183	0.00282007896221	0.00112803158488	0.00630733944954	0.00338409475465	0.00286697247706	0.00974770642202	0.00507614213198	0.00172018348624	0.0023768366465
FBgn0031182	0.0198555956679	0.00180505415162	0.00715071507151	0.00361010830325	0.0	0.00715071507151	0.0228640192539	0.001100110011	0.0023768366465
FBgn0028484	0.00282007896221	0.00112803158488	0.00630733944954	0.00338409475465	0.00286697247706	0.00974770642202	0.00507614213198	0.00172018348624	0.0023768366465
FBgn0011722	0.0325814536341	0.015873015873	0.0401869158879	0.0392648287385	0.0140186915888	0.0691588785047	0.0651629072682	0.0130841121495	0.0023768366465
FBgn0028480	0.00282007896221	0.00112803158488	0.00630733944954	0.00338409475465	0.00286697247706	0.00974770642202	0.00507614213198	0.00172018348624	0.0023768366465
FBgn0029854	0.00282007896221	0.00112803158488	0.00630733944954	0.00338409475465	0.00286697247706	0.00974770642202	0.00507614213198	0.00172018348624	0.0023768366465
FBgn0035508	0.0198555956679	0.00180505415162	0.00715071507151	0.00361010830325	0.0	0.00715071507151	0.0228640192539	0.001100110011	0.0023768366465
FBgn0029858	0.00282007896221	0.00112803158488	0.00630733944954	0.00338409475465	0.00286697247706	0.00974770642202	0.00507614213198	0.00172018348624	0.0023768366465
FBgn0040992	0.0198555956679	0.00180505415162	0.0401869158879	0.00361010830325	0.0140186915888	0.0691588785047	0.0228640192539	0.0130841121495	0.0023768366465
FBgn0040993	0.0198555956679	0.00180505415162	0.00715071507151	0.00361010830325	0.0	0.00715071507151	0.0228640192539	0.001100110011	0.0023768366465
FBgn0035507	0.00282007896221	0.00112803158488	0.00630733944954	0.00338409475465	0.00286697247706	0.00974770642202	0.00507614213198	0.00172018348624	0.0023768366465
FBgn0030053	0.00282007896221	0.00112803158488	0.00630733944954	0.00338409475465	0.00286697247706	0.00974770642202	0.00507614213198	0.00172018348624	0.0023768366465
FBgn0030050	0.0198555956679	0.00180505415162	0.00715071507151	0.00361010830325	0.0	0.00715071507151	0.0228640192539	0.001100110011	0.0023768366465
FBgn0030051	0.0198555956679	0.00180505415162	0.00715071507151	0.00361010830325	0.0	0.00715071507151	0.0228640192539	0.001100110011	0.0023768366465
FBgn0035154	0.0198555956679	0.00180505415162	0.0401869158879	0.00361010830325	0.0140186915888	0.0691588785047	0.0228640192539	0.0130841121495	0.0023768366465
FBgn0033238	0.0198555956679	0.00180505415162	0.00715071507151	0.00361010830325	0.0	0.00715071507151	0.0228640192539	0.001100110011	0.0023768366465
FBgn0033236	0.00282007896221	0.00112803158488	0.0401869158879	0.00338409475465	0.0140186915888	0.0691588785047	0.00507614213198	0.0130841121495	0.0023768366465
FBgn0033235	0.0325814536341	0.015873015873	0.00630733944954	0.0392648287385	0.00286697247706	0.00974770642202	0.0651629072682	0.00172018348624	0.0023768366465
FBgn0033234	0.0198555956679	0.00180505415162	0.00715071507151	0.00361010830325	0.0	0.00715071507151	0.0228640192539	0.001100110011	0.0023768366465
FBgn0034939	0.00282007896221	0.00112803158488	0.00630733944954	0.00338409475465	0.00286697247706	0.00974770642202	0.00507614213198	0.00172018348624	0.0023768366465
FBgn0035501	0.0198555956679	0.00180505415162	0.00715071507151	0.00361010830325	0.0	0.00715071507151	0.0228640192539	0.001100110011	0.0023768366465
FBgn0037416	0.0198555956679	0.00180505415162	0.00715071507151	0.00361010830325	0.0	0.00715071507151	0.0228640192539	0.001100110011	0.0023768366465
FBgn0034931	0.00282007896221	0.00112803158488	0.0401869158879	0.00338409475465	0.0140186915888	0.0691588785047	0.00507614213198	0.0130841121495	0.0023768366465
FBgn0034242	0.0325814536341	0.015873015873	0.0401869158879	0.0392648287385	0.0140186915888	0.0691588785047	0.0651629072682	0.0130841121495	0.0023768366465
FBgn0034935	0.0198555956679	0.00180505415162	0.0401869158879	0.00361010830325	0.0140186915888	0.0691588785047	0.0228640192539	0.0130841121495	0.0023768366465
FBgn0034937	0.0325814536341	0.015873015873	0.0401869158879	0.0392648287385	0.0140186915888	0.0691588785047	0.0651629072682	0.0130841121495	0.0023768366465
FBgn0034936	0.0325814536341	0.015873015873	0.0401869158879	0.0392648287385	0.0140186915888	0.0691588785047	0.0651629072682	0.0130841121495	0.0023768366465
FBgn0038008	0.0198555956679	0.00180505415162	0.00715071507151	0.00361010830325	0.0	0.00715071507151	0.0228640192539	0.001100110011	0.0023768366465
FBgn0015396	0.0325814536341	0.015873015873	0.00630733944954	0.0392648287385	0.00286697247706	0.00974770642202	0.0651629072682	0.00172018348624	0.0023768366465
FBgn0037414	0.0198555956679	0.00180505415162	0.00715071507151	0.00361010830325	0.0	0.00715071507151	0.0228640192539	0.001100110011	0.0023768366465
FBgn0032431	0.0325814536341	0.015873015873	0.00715071507151	0.0392648287385	0.0	0.00715071507151	0.0651629072682	0.001100110011	0.0023768366465
FBgn0038000	0.0198555956679	0.00180505415162	0.00715071507151	0.00361010830325	0.0	0.00715071507151	0.0228640192539	0.001100110011	0.0023768366465
FBgn0038005	0.0198555956679	0.00180505415162	0.00715071507151	0.00361010830325	0.0	0.00715071507151	0.0228640192539	0.001100110011	0.0023768366465
FBgn0030638	0.0325814536341	0.015873015873	0.0401869158879	0.0392648287385	0.0140186915888	0.0691588785047	0.0651629072682	0.0130841121495	0.0023768366465
FBgn0020377	0.0325814536341	0.015873015873	0.0401869158879	0.0392648287385	0.0140186915888	0.0691588785047	0.0651629072682	0.0130841121495	0.0023768366465
FBgn0032366	0.0198555956679	0.00180505415162	0.00715071507151	0.00361010830325	0.0	0.00715071507151	0.0228640192539	0.001100110011	0.0023768366465
FBgn0030634	0.0325814536341	0.015873015873	0.00715071507151	0.0392648287385	0.0	0.00715071507151	0.0651629072682	0.001100110011	0.0023768366465
FBgn0037410	0.0198555956679	0.00180505415162	0.00715071507151	0.00361010830325	0.0	0.00715071507151	0.0228640192539	0.001100110011	0.0023768366465
FBgn0030630	0.00282007896221	0.00112803158488	0.0401869158879	0.00338409475465	0.0140186915888	0.0691588785047	0.00507614213198	0.0130841121495	0.0023768366465
FBgn0036063	0.00282007896221	0.00112803158488	0.00630733944954	0.00338409475465	0.00286697247706	0.00974770642202	0.00507614213198	0.00172018348624	0.0023768366465
FBgn0036064	0.00282007896221	0.00112803158488	0.00630733944954	0.00338409475465	0.00286697247706	0.00974770642202	0.00507614213198	0.00172018348624	0.0023768366465
FBgn0036068	0.0198555956679	0.00180505415162	0.00715071507151	0.00361010830325	0.0	0.00715071507151	0.0228640192539	0.001100110011	0.0023768366465
FBgn0040339	0.00282007896221	0.00112803158488	0.00630733944954	0.00338409475465	0.00286697247706	0.00974770642202	0.00507614213198	0.00172018348624	0.0023768366465
FBgn0033760	0.0198555956679	0.00180505415162	0.00715071507151	0.00361010830325	0.0	0.00715071507151	0.0228640192539	0.001100110011	0.0023768366465
FBgn0010452	0.0325814536341	0.015873015873	0.0401869158879	0.0392648287385	0.0140186915888	0.0691588785047	0.0651629072682	0.0130841121495	0.0023768366465
FBgn0040333	0.00282007896221	0.00112803158488	0.00630733944954	0.00338409475465	0.00286697247706	0.00974770642202	0.00507614213198	0.00172018348624	0.0023768366465
FBgn0040336	0.00282007896221	0.00112803158488	0.00630733944954	0.00338409475465	0.00286697247706	0.00974770642202	0.00507614213198	0.00172018348624	0.0023768366465
FBgn0040337	0.00282007896221	0.00112803158488	0.00630733944954	0.00338409475465	0.00286697247706	0.00974770642202	0.00507614213198	0.00172018348624	0.0023768366465
FBgn0032987	0.00282007896221	0.00112803158488	0.00630733944954	0.00338409475465	0.00286697247706	0.00974770642202	0.00507614213198	0.00172018348624	0.0023768366465
FBgn0036513	0.00282007896221	0.00112803158488	0.00630733944954	0.00338409475465	0.00286697247706	0.00974770642202	0.00507614213198	0.00172018348624	0.0023768366465
FBgn0004580	0.0198555956679	0.00180505415162	0.00715071507151	0.00361010830325	0.0	0.00715071507151	0.0228640192539	0.001100110011	0.0023768366465
FBgn0023023	0.00282007896221	0.00112803158488	0.0401869158879	0.00338409475465	0.0140186915888	0.0691588785047	0.00507614213198	0.0130841121495	0.0023768366465
FBgn0004366	0.0198555956679	0.00180505415162	0.00715071507151	0.00361010830325	0.0	0.00715071507151	0.0228640192539	0.001100110011	0.0023768366465
FBgn0033316	0.00282007896221	0.00112803158488	0.00630733944954	0.00338409475465	0.00286697247706	0.00974770642202	0.00507614213198	0.00172018348624	0.0023768366465
FBgn0036512	0.00282007896221	0.00112803158488	0.00630733944954	0.00338409475465	0.00286697247706	0.00974770642202	0.00507614213198	0.00172018348624	0.0023768366465
FBgn0032189	0.00282007896221	0.00112803158488	0.00630733944954	0.00338409475465	0.00286697247706	0.00974770642202	0.00507614213198	0.00172018348624	0.0023768366465
FBgn0032187	0.0198555956679	0.00180505415162	0.00715071507151	0.00361010830325	0.0	0.00715071507151	0.0228640192539	0.001100110011	0.0023768366465
FBgn0032180	0.0198555956679	0.00180505415162	0.00715071507151	0.00361010830325	0.0	0.00715071507151	0.0228640192539	0.001100110011	0.0023768366465
FBgn0037325	0.0198555956679	0.00180505415162	0.00715071507151	0.00361010830325	0.0	0.00715071507151	0.0228640192539	0.001100110011	0.0023768366465
FBgn0037634	0.00282007896221	0.00112803158488	0.00630733944954	0.00338409475465	0.00286697247706	0.00974770642202	0.00507614213198	0.00172018348624	0.0023768366465
FBgn0034114	0.00282007896221	0.00112803158488	0.00630733944954	0.00338409475465	0.00286697247706	0.00974770642202	0.00507614213198	0.00172018348624	0.0023768366465
FBgn0039870	0.00282007896221	0.00112803158488	0.00630733944954	0.00338409475465	0.00286697247706	0.00974770642202	0.00507614213198	0.00172018348624	0.0023768366465
FBgn0037321	0.00282007896221	0.00112803158488	0.00630733944954	0.00338409475465	0.00286697247706	0.00974770642202	0.00507614213198	0.00172018348624	0.0023768366465
FBgn0028482	0.0198555956679	0.00180505415162	0.00715071507151	0.00361010830325	0.0	0.00715071507151	0.0228640192539	0.001100110011	0.0023768366465
FBgn0031432	0.0198555956679	0.00180505415162	0.00715071507151	0.00361010830325	0.0	0.00715071507151	0.0228640192539	0.001100110011	0.0023768366465
FBgn0034500	0.0325814536341	0.015873015873	0.0401869158879	0.0392648287385	0.0140186915888	0.0691588785047	0.0651629072682	0.0130841121495	0.0023768366465
FBgn0004581	0.0198555956679	0.00180505415162	0.0401869158879	0.00361010830325	0.0140186915888	0.0691588785047	0.0228640192539	0.0130841121495	0.0023768366465
FBgn0032369	0.0198555956679	0.00180505415162	0.00715071507151	0.00361010830325	0.0	0.00715071507151	0.0228640192539	0.001100110011	0.0023768366465
FBgn0004587	0.00282007896221	0.00112803158488	0.00630733944954	0.00338409475465	0.00286697247706	0.00974770642202	0.00507614213198	0.00172018348624	0.0023768366465
FBgn0031926	0.0325814536341	0.015873015873	0.00715071507151	0.0392648287385	0.0	0.00715071507151	0.0651629072682	0.001100110011	0.0023768366465
FBgn0034853	0.00282007896221	0.00112803158488	0.00630733944954	0.00338409475465	0.00286697247706	0.00974770642202	0.00507614213198	0.00172018348624	0.0023768366465
FBgn0034850	0.0325814536341	0.015873015873	0.0401869158879	0.0392648287385	0.0140186915888	0.0691588785047	0.0651629072682	0.0130841121495	0.0023768366465
FBgn0000166	0.0198555956679	0.00180505415162	0.00715071507151	0.00361010830325	0.0	0.00715071507151	0.0228640192539	0.001100110011	0.0023768366465
FBgn0003200	0.00282007896221	0.00112803158488	0.00630733944954	0.00338409475465	0.00286697247706	0.00974770642202	0.00507614213198	0.00172018348624	0.0023768366465
FBgn0003205	0.00282007896221	0.00112803158488	0.00630733944954	0.00338409475465	0.00286697247706	0.00974770642202	0.00507614213198	0.00172018348624	0.0023768366465
FBgn0005670	0.0198555956679	0.00180505415162	0.00715071507151	0.00361010830325	0.0	0.00715071507151	0.0228640192539	0.001100110011	0.0023768366465
FBgn0037856	0.00282007896221	0.00112803158488	0.00630733944954	0.00338409475465	0.00286697247706	0.00974770642202	0.00507614213198	0.00172018348624	0.0023768366465
FBgn0037852	0.0325814536341	0.015873015873	0.00630733944954	0.0392648287385	0.00286697247706	0.00974770642202	0.0651629072682	0.00172018348624	0.0023768366465
FBgn0020372	0.0198555956679	0.00180505415162	0.00715071507151	0.00361010830325	0.0	0.00715071507151	0.0228640192539	0.001100110011	0.0023768366465
FBgn0042205	0.00282007896221	0.00112803158488	0.00630733944954	0.00338409475465	0.00286697247706	0.00974770642202	0.00507614213198	0.00172018348624	0.0023768366465
FBgn0042201	0.0198555956679	0.00180505415162	0.00715071507151	0.00361010830325	0.0	0.00715071507151	0.0228640192539	0.001100110011	0.0023768366465
FBgn0024833	0.00282007896221	0.00112803158488	0.00630733944954	0.00338409475465	0.00286697247706	0.00974770642202	0.00507614213198	0.00172018348624	0.0023768366465
FBgn0024832	0.00282007896221	0.00112803158488	0.00630733944954	0.00338409475465	0.00286697247706	0.00974770642202	0.00507614213198	0.00172018348624	0.0023768366465
FBgn0024836	0.0198555956679	0.00180505415162	0.00715071507151	0.00361010830325	0.0	0.00715071507151	0.0228640192539	0.001100110011	0.0023768366465
FBgn0035325	0.0198555956679	0.00180505415162	0.0401869158879	0.00361010830325	0.0140186915888	0.0691588785047	0.0228640192539	0.0130841121495	0.0023768366465
FBgn0035321	0.0325814536341	0.015873015873	0.0401869158879	0.0392648287385	0.0140186915888	0.0691588785047	0.0651629072682	0.0130841121495	0.0023768366465
FBgn0004394	0.0325814536341	0.015873015873	0.0401869158879	0.0392648287385	0.0140186915888	0.0691588785047	0.0651629072682	0.0130841121495	0.0023768366465
FBgn0002924	0.00282007896221	0.00112803158488	0.00630733944954	0.00338409475465	0.00286697247706	0.00974770642202	0.00507614213198	0.00172018348624	0.0023768366465
FBgn0028737	0.00282007896221	0.00112803158488	0.00630733944954	0.00338409475465	0.00286697247706	0.00974770642202	0.00507614213198	0.00172018348624	0.0023768366465
FBgn0028734	0.0325814536341	0.015873015873	0.0401869158879	0.0392648287385	0.0140186915888	0.0691588785047	0.0651629072682	0.0130841121495	0.0023768366465
FBgn0022160	0.0325814536341	0.015873015873	0.00715071507151	0.0392648287385	0.0	0.00715071507151	0.0651629072682	0.001100110011	0.0023768366465
FBgn0005671	0.00282007896221	0.00112803158488	0.00630733944954	0.00338409475465	0.00286697247706	0.00974770642202	0.00507614213198	0.00172018348624	0.0023768366465
FBgn0028969	0.00282007896221	0.00112803158488	0.00630733944954	0.00338409475465	0.00286697247706	0.00974770642202	0.00507614213198	0.00172018348624	0.0023768366465
FBgn0052306	0.0325814536341	0.015873015873	0.0401869158879	0.0392648287385	0.0140186915888	0.0691588785047	0.0651629072682	0.0130841121495	0.0023768366465
FBgn0030521	0.00282007896221	0.00112803158488	0.00630733944954	0.00338409475465	0.00286697247706	0.00974770642202	0.00507614213198	0.00172018348624	0.0023768366465
FBgn0034744	0.00282007896221	0.00112803158488	0.00630733944954	0.00338409475465	0.00286697247706	0.00974770642202	0.00507614213198	0.00172018348624	0.0023768366465
FBgn0031514	0.0198555956679	0.00180505415162	0.00715071507151	0.00361010830325	0.0	0.00715071507151	0.0228640192539	0.001100110011	0.0023768366465
FBgn0031048	0.0325814536341	0.015873015873	0.0401869158879	0.0392648287385	0.0140186915888	0.0691588785047	0.0651629072682	0.0130841121495	0.0023768366465
FBgn0036890	0.0325814536341	0.015873015873	0.0401869158879	0.0392648287385	0.0140186915888	0.0691588785047	0.0651629072682	0.0130841121495	0.0023768366465
FBgn0036891	0.0325814536341	0.015873015873	0.00715071507151	0.0392648287385	0.0	0.00715071507151	0.0651629072682	0.001100110011	0.0023768366465
FBgn0036893	0.00282007896221	0.00112803158488	0.00630733944954	0.00338409475465	0.00286697247706	0.00974770642202	0.00507614213198	0.00172018348624	0.0023768366465
FBgn0052243	0.0325814536341	0.015873015873	0.0401869158879	0.0392648287385	0.0140186915888	0.0691588785047	0.0651629072682	0.0130841121495	0.0023768366465
FBgn0036895	0.0198555956679	0.00180505415162	0.0401869158879	0.00361010830325	0.0140186915888	0.0691588785047	0.0228640192539	0.0130841121495	0.0023768366465
FBgn0036899	0.0198555956679	0.00180505415162	0.0401869158879	0.00361010830325	0.0140186915888	0.0691588785047	0.0228640192539	0.0130841121495	0.0023768366465
FBgn0011556	0.0198555956679	0.00180505415162	0.00715071507151	0.00361010830325	0.0	0.00715071507151	0.0228640192539	0.001100110011	0.0023768366465
FBgn0001148	0.0325814536341	0.015873015873	0.0401869158879	0.0392648287385	0.0140186915888	0.0691588785047	0.0651629072682	0.0130841121495	0.0023768366465
FBgn0011555	0.0198555956679	0.00180505415162	0.00715071507151	0.00361010830325	0.0	0.00715071507151	0.0228640192539	0.001100110011	0.0023768366465
FBgn0001149	0.0325814536341	0.015873015873	0.0401869158879	0.0392648287385	0.0140186915888	0.0691588785047	0.0651629072682	0.0130841121495	0.0023768366465
FBgn0011559	0.0198555956679	0.00180505415162	0.00715071507151	0.00361010830325	0.0	0.00715071507151	0.0228640192539	0.001100110011	0.0023768366465
FBgn0040832	0.0198555956679	0.00180505415162	0.00715071507151	0.00361010830325	0.0	0.00715071507151	0.0228640192539	0.001100110011	0.0023768366465
FBgn0051534	0.0198555956679	0.00180505415162	0.00715071507151	0.00361010830325	0.0	0.00715071507151	0.0228640192539	0.001100110011	0.0023768366465
FBgn0051536	0.00282007896221	0.00112803158488	0.00630733944954	0.00338409475465	0.00286697247706	0.00974770642202	0.00507614213198	0.00172018348624	0.0023768366465
FBgn0026262	0.00282007896221	0.00112803158488	0.00630733944954	0.00338409475465	0.00286697247706	0.00974770642202	0.00507614213198	0.00172018348624	0.0023768366465
FBgn0002985	0.0198555956679	0.00180505415162	0.0401869158879	0.00361010830325	0.0140186915888	0.0691588785047	0.0228640192539	0.0130841121495	0.0023768366465
FBgn0002989	0.00282007896221	0.00112803158488	0.00630733944954	0.00338409475465	0.00286697247706	0.00974770642202	0.00507614213198	0.00172018348624	0.0023768366465
FBgn0026268	0.0198555956679	0.00180505415162	0.00715071507151	0.00361010830325	0.0	0.00715071507151	0.0228640192539	0.001100110011	0.0023768366465
FBgn0015336	0.0198555956679	0.00180505415162	0.00715071507151	0.00361010830325	0.0	0.00715071507151	0.0228640192539	0.001100110011	0.0023768366465
FBgn0030930	0.00282007896221	0.00112803158488	0.00630733944954	0.00338409475465	0.00286697247706	0.00974770642202	0.00507614213198	0.00172018348624	0.0023768366465
FBgn0030933	0.0198555956679	0.00180505415162	0.0401869158879	0.00361010830325	0.0140186915888	0.0691588785047	0.0228640192539	0.0130841121495	0.0023768366465
FBgn0030932	0.0198555956679	0.00180505415162	0.0401869158879	0.00361010830325	0.0140186915888	0.0691588785047	0.0228640192539	0.0130841121495	0.0023768366465
FBgn0000052	0.0325814536341	0.015873015873	0.0401869158879	0.0392648287385	0.0140186915888	0.0691588785047	0.0651629072682	0.0130841121495	0.0023768366465
FBgn0037218	0.00282007896221	0.00112803158488	0.00630733944954	0.00338409475465	0.00286697247706	0.00974770642202	0.00507614213198	0.00172018348624	0.0023768366465
FBgn0033919	0.0325814536341	0.015873015873	0.0401869158879	0.0392648287385	0.0140186915888	0.0691588785047	0.0651629072682	0.0130841121495	0.0023768366465
FBgn0001258	0.0325814536341	0.015873015873	0.0401869158879	0.0392648287385	0.0140186915888	0.0691588785047	0.0651629072682	0.0130841121495	0.0023768366465
FBgn0033913	0.0325814536341	0.015873015873	0.0401869158879	0.0392648287385	0.0140186915888	0.0691588785047	0.0651629072682	0.0130841121495	0.0023768366465
FBgn0033916	0.00282007896221	0.00112803158488	0.00630733944954	0.00338409475465	0.00286697247706	0.00974770642202	0.00507614213198	0.00172018348624	0.0023768366465
FBgn0039544	0.00282007896221	0.00112803158488	0.00630733944954	0.00338409475465	0.00286697247706	0.00974770642202	0.00507614213198	0.00172018348624	0.0023768366465
FBgn0039543	0.0325814536341	0.015873015873	0.00630733944954	0.0392648287385	0.00286697247706	0.00974770642202	0.0651629072682	0.00172018348624	0.0023768366465
FBgn0032435	0.0325814536341	0.015873015873	0.00715071507151	0.0392648287385	0.0	0.00715071507151	0.0651629072682	0.001100110011	0.0023768366465
FBgn0004777	0.0198555956679	0.00180505415162	0.00715071507151	0.00361010830325	0.0	0.00715071507151	0.0228640192539	0.001100110011	0.0023768366465
FBgn0004779	0.0198555956679	0.00180505415162	0.00715071507151	0.00361010830325	0.0	0.00715071507151	0.0228640192539	0.001100110011	0.0023768366465
FBgn0004117	0.0325814536341	0.015873015873	0.00715071507151	0.0392648287385	0.0	0.00715071507151	0.0651629072682	0.001100110011	0.0023768366465
FBgn0004110	0.0325814536341	0.015873015873	0.0401869158879	0.0392648287385	0.0140186915888	0.0691588785047	0.0651629072682	0.0130841121495	0.0023768366465
FBgn0050008	0.0325814536341	0.015873015873	0.0401869158879	0.0392648287385	0.0140186915888	0.0691588785047	0.0651629072682	0.0130841121495	0.0023768366465
FBgn0034985	0.0325814536341	0.015873015873	0.0401869158879	0.0392648287385	0.0140186915888	0.0691588785047	0.0651629072682	0.0130841121495	0.0023768366465
FBgn0052533	0.00282007896221	0.00112803158488	0.00630733944954	0.00338409475465	0.00286697247706	0.00974770642202	0.00507614213198	0.00172018348624	0.0023768366465
FBgn0035518	0.00282007896221	0.00112803158488	0.00630733944954	0.00338409475465	0.00286697247706	0.00974770642202	0.00507614213198	0.00172018348624	0.0023768366465
FBgn0038839	0.0198555956679	0.00180505415162	0.00715071507151	0.00361010830325	0.0	0.00715071507151	0.0228640192539	0.001100110011	0.0023768366465
FBgn0038834	0.00282007896221	0.00112803158488	0.00630733944954	0.00338409475465	0.00286697247706	0.00974770642202	0.00507614213198	0.00172018348624	0.0023768366465
FBgn0038830	0.0325814536341	0.015873015873	0.0401869158879	0.0392648287385	0.0140186915888	0.0691588785047	0.0651629072682	0.0130841121495	0.0023768366465
FBgn0035513	0.0198555956679	0.00180505415162	0.00715071507151	0.00361010830325	0.0	0.00715071507151	0.0228640192539	0.001100110011	0.0023768366465
FBgn0013988	0.00282007896221	0.00112803158488	0.00630733944954	0.00338409475465	0.00286697247706	0.00974770642202	0.00507614213198	0.00172018348624	0.0023768366465
FBgn0013983	0.0325814536341	0.015873015873	0.0401869158879	0.0392648287385	0.0140186915888	0.0691588785047	0.0651629072682	0.0130841121495	0.0023768366465
FBgn0033777	0.00282007896221	0.00112803158488	0.0401869158879	0.00338409475465	0.0140186915888	0.0691588785047	0.00507614213198	0.0130841121495	0.0023768366465
FBgn0046878	0.0198555956679	0.00180505415162	0.00715071507151	0.00361010830325	0.0	0.00715071507151	0.0228640192539	0.001100110011	0.0023768366465
FBgn0005649	0.00282007896221	0.00112803158488	0.00630733944954	0.00338409475465	0.00286697247706	0.00974770642202	0.00507614213198	0.00172018348624	0.0023768366465
FBgn0005648	0.00282007896221	0.00112803158488	0.00630733944954	0.00338409475465	0.00286697247706	0.00974770642202	0.00507614213198	0.00172018348624	0.0023768366465
FBgn0005642	0.00282007896221	0.00112803158488	0.00630733944954	0.00338409475465	0.00286697247706	0.00974770642202	0.00507614213198	0.00172018348624	0.0023768366465
FBgn0005640	0.00282007896221	0.00112803158488	0.00630733944954	0.00338409475465	0.00286697247706	0.00974770642202	0.00507614213198	0.00172018348624	0.0023768366465
FBgn0004646	0.00282007896221	0.00112803158488	0.00630733944954	0.00338409475465	0.00286697247706	0.00974770642202	0.00507614213198	0.00172018348624	0.0023768366465
FBgn0035149	0.00282007896221	0.00112803158488	0.00630733944954	0.00338409475465	0.00286697247706	0.00974770642202	0.00507614213198	0.00172018348624	0.0023768366465
FBgn0032798	0.0325814536341	0.015873015873	0.00715071507151	0.0392648287385	0.0	0.00715071507151	0.0651629072682	0.001100110011	0.0023768366465
FBgn0032790	0.00282007896221	0.00112803158488	0.0401869158879	0.00338409475465	0.0140186915888	0.0691588785047	0.00507614213198	0.0130841121495	0.0023768366465
FBgn0032797	0.0198555956679	0.00180505415162	0.00715071507151	0.00361010830325	0.0	0.00715071507151	0.0228640192539	0.001100110011	0.0023768366465
FBgn0029824	0.0325814536341	0.015873015873	0.0401869158879	0.0392648287385	0.0140186915888	0.0691588785047	0.0651629072682	0.0130841121495	0.0023768366465
FBgn0034405	0.0198555956679	0.00180505415162	0.00715071507151	0.00361010830325	0.0	0.00715071507151	0.0228640192539	0.001100110011	0.0023768366465
FBgn0032429	0.00282007896221	0.00112803158488	0.00630733944954	0.00338409475465	0.00286697247706	0.00974770642202	0.00507614213198	0.00172018348624	0.0023768366465
FBgn0032428	0.0325814536341	0.015873015873	0.0401869158879	0.0392648287385	0.0140186915888	0.0691588785047	0.0651629072682	0.0130841121495	0.0023768366465
FBgn0039305	0.00282007896221	0.00112803158488	0.0401869158879	0.00338409475465	0.0140186915888	0.0691588785047	0.00507614213198	0.0130841121495	0.0023768366465
FBgn0032421	0.00282007896221	0.00112803158488	0.00630733944954	0.00338409475465	0.00286697247706	0.00974770642202	0.00507614213198	0.00172018348624	0.0023768366465
FBgn0032509	0.00282007896221	0.00112803158488	0.00630733944954	0.00338409475465	0.00286697247706	0.00974770642202	0.00507614213198	0.00172018348624	0.0023768366465
FBgn0025777	0.00282007896221	0.00112803158488	0.00630733944954	0.00338409475465	0.00286697247706	0.00974770642202	0.00507614213198	0.00172018348624	0.0023768366465
FBgn0039049	0.0325814536341	0.015873015873	0.0401869158879	0.0392648287385	0.0140186915888	0.0691588785047	0.0651629072682	0.0130841121495	0.0023768366465
FBgn0039043	0.0325814536341	0.015873015873	0.00715071507151	0.0392648287385	0.0	0.00715071507151	0.0651629072682	0.001100110011	0.0023768366465
FBgn0039044	0.0325814536341	0.015873015873	0.0401869158879	0.0392648287385	0.0140186915888	0.0691588785047	0.0651629072682	0.0130841121495	0.0023768366465
FBgn0031216	0.00282007896221	0.00112803158488	0.00630733944954	0.00338409475465	0.00286697247706	0.00974770642202	0.00507614213198	0.00172018348624	0.0023768366465
FBgn0015805	0.00282007896221	0.00112803158488	0.00630733944954	0.00338409475465	0.00286697247706	0.00974770642202	0.00507614213198	0.00172018348624	0.0023768366465
FBgn0015801	0.0325814536341	0.015873015873	0.0401869158879	0.0392648287385	0.0140186915888	0.0691588785047	0.0651629072682	0.0130841121495	0.0023768366465
FBgn0027615	0.0325814536341	0.015873015873	0.0401869158879	0.0392648287385	0.0140186915888	0.0691588785047	0.0651629072682	0.0130841121495	0.0023768366465
FBgn0027611	0.0325814536341	0.015873015873	0.0401869158879	0.0392648287385	0.0140186915888	0.0691588785047	0.0651629072682	0.0130841121495	0.0023768366465
FBgn0029878	0.00282007896221	0.00112803158488	0.00630733944954	0.00338409475465	0.00286697247706	0.00974770642202	0.00507614213198	0.00172018348624	0.0023768366465
FBgn0029879	0.0198555956679	0.00180505415162	0.00715071507151	0.00361010830325	0.0	0.00715071507151	0.0228640192539	0.001100110011	0.0023768366465
FBgn0029877	0.0198555956679	0.00180505415162	0.00715071507151	0.00361010830325	0.0	0.00715071507151	0.0228640192539	0.001100110011	0.0023768366465
FBgn0034485	0.0198555956679	0.00180505415162	0.00715071507151	0.00361010830325	0.0	0.00715071507151	0.0228640192539	0.001100110011	0.0023768366465
FBgn0029873	0.00282007896221	0.00112803158488	0.00630733944954	0.00338409475465	0.00286697247706	0.00974770642202	0.00507614213198	0.00172018348624	0.0023768366465
FBgn0038799	0.0198555956679	0.00180505415162	0.00715071507151	0.00361010830325	0.0	0.00715071507151	0.0228640192539	0.001100110011	0.0023768366465
FBgn0036939	0.0198555956679	0.00180505415162	0.00715071507151	0.00361010830325	0.0	0.00715071507151	0.0228640192539	0.001100110011	0.0023768366465
FBgn0030038	0.00282007896221	0.00112803158488	0.00630733944954	0.00338409475465	0.00286697247706	0.00974770642202	0.00507614213198	0.00172018348624	0.0023768366465
FBgn0036935	0.0325814536341	0.015873015873	0.00715071507151	0.0392648287385	0.0	0.00715071507151	0.0651629072682	0.001100110011	0.0023768366465
FBgn0030033	0.0198555956679	0.00180505415162	0.00715071507151	0.00361010830325	0.0	0.00715071507151	0.0228640192539	0.001100110011	0.0023768366465
FBgn0033210	0.00282007896221	0.00112803158488	0.00630733944954	0.00338409475465	0.00286697247706	0.00974770642202	0.00507614213198	0.00172018348624	0.0023768366465
FBgn0033215	0.0198555956679	0.00180505415162	0.0401869158879	0.00361010830325	0.0140186915888	0.0691588785047	0.0228640192539	0.0130841121495	0.0023768366465
FBgn0033214	0.0198555956679	0.00180505415162	0.00715071507151	0.00361010830325	0.0	0.00715071507151	0.0228640192539	0.001100110011	0.0023768366465
FBgn0027929	0.0325814536341	0.015873015873	0.00715071507151	0.0392648287385	0.0	0.00715071507151	0.0651629072682	0.001100110011	0.0023768366465
FBgn0034269	0.00282007896221	0.00112803158488	0.00630733944954	0.00338409475465	0.00286697247706	0.00974770642202	0.00507614213198	0.00172018348624	0.0023768366465
FBgn0032910	0.0198555956679	0.00180505415162	0.00715071507151	0.00361010830325	0.0	0.00715071507151	0.0228640192539	0.001100110011	0.0023768366465
FBgn0034264	0.0325814536341	0.015873015873	0.0401869158879	0.0392648287385	0.0140186915888	0.0691588785047	0.0651629072682	0.0130841121495	0.0023768366465
FBgn0010294	0.0198555956679	0.00180505415162	0.00715071507151	0.00361010830325	0.0	0.00715071507151	0.0228640192539	0.001100110011	0.0023768366465
FBgn0034263	0.0198555956679	0.00180505415162	0.00715071507151	0.00361010830325	0.0	0.00715071507151	0.0228640192539	0.001100110011	0.0023768366465
FBgn0037686	0.00282007896221	0.00112803158488	0.00630733944954	0.00338409475465	0.00286697247706	0.00974770642202	0.00507614213198	0.00172018348624	0.0023768366465
FBgn0037687	0.00282007896221	0.00112803158488	0.00630733944954	0.00338409475465	0.00286697247706	0.00974770642202	0.00507614213198	0.00172018348624	0.0023768366465
FBgn0037684	0.0198555956679	0.00180505415162	0.00715071507151	0.00361010830325	0.0	0.00715071507151	0.0228640192539	0.001100110011	0.0023768366465
FBgn0037683	0.0198555956679	0.00180505415162	0.00715071507151	0.00361010830325	0.0	0.00715071507151	0.0228640192539	0.001100110011	0.0023768366465
FBgn0025742	0.00282007896221	0.00112803158488	0.00630733944954	0.00338409475465	0.00286697247706	0.00974770642202	0.00507614213198	0.00172018348624	0.0023768366465
FBgn0000338	0.0325814536341	0.015873015873	0.0401869158879	0.0392648287385	0.0140186915888	0.0691588785047	0.0651629072682	0.0130841121495	0.0023768366465
FBgn0010473	0.00282007896221	0.00112803158488	0.0401869158879	0.00338409475465	0.0140186915888	0.0691588785047	0.00507614213198	0.0130841121495	0.0023768366465
FBgn0010470	0.0325814536341	0.015873015873	0.0401869158879	0.0392648287385	0.0140186915888	0.0691588785047	0.0651629072682	0.0130841121495	0.0023768366465
FBgn0051272	0.0325814536341	0.015873015873	0.00715071507151	0.0392648287385	0.0	0.00715071507151	0.0651629072682	0.001100110011	0.0023768366465
FBgn0040318	0.0325814536341	0.015873015873	0.0401869158879	0.0392648287385	0.0140186915888	0.0691588785047	0.0651629072682	0.0130841121495	0.0023768366465
FBgn0040319	0.0325814536341	0.015873015873	0.0401869158879	0.0392648287385	0.0140186915888	0.0691588785047	0.0651629072682	0.0130841121495	0.0023768366465
FBgn0051274	0.0198555956679	0.00180505415162	0.00715071507151	0.00361010830325	0.0	0.00715071507151	0.0228640192539	0.001100110011	0.0023768366465
FBgn0033875	0.0198555956679	0.00180505415162	0.00715071507151	0.00361010830325	0.0	0.00715071507151	0.0228640192539	0.001100110011	0.0023768366465
FBgn0033874	0.0198555956679	0.00180505415162	0.00715071507151	0.00361010830325	0.0	0.00715071507151	0.0228640192539	0.001100110011	0.0023768366465
FBgn0050278	0.0198555956679	0.00180505415162	0.00715071507151	0.00361010830325	0.0	0.00715071507151	0.0228640192539	0.001100110011	0.0023768366465
FBgn0031391	0.00282007896221	0.00112803158488	0.00630733944954	0.00338409475465	0.00286697247706	0.00974770642202	0.00507614213198	0.00172018348624	0.0023768366465
FBgn0050271	0.0198555956679	0.00180505415162	0.00715071507151	0.00361010830325	0.0	0.00715071507151	0.0228640192539	0.001100110011	0.0023768366465
FBgn0058053	0.0198555956679	0.00180505415162	0.00715071507151	0.00361010830325	0.0	0.00715071507151	0.0228640192539	0.001100110011	0.0023768366465
FBgn0033873	0.0198555956679	0.00180505415162	0.00715071507151	0.00361010830325	0.0	0.00715071507151	0.0228640192539	0.001100110011	0.0023768366465
FBgn0033872	0.0325814536341	0.015873015873	0.0401869158879	0.0392648287385	0.0140186915888	0.0691588785047	0.0651629072682	0.0130841121495	0.0023768366465
FBgn0037574	0.00282007896221	0.00112803158488	0.0401869158879	0.00338409475465	0.0140186915888	0.0691588785047	0.00507614213198	0.0130841121495	0.0023768366465
FBgn0053098	0.0198555956679	0.00180505415162	0.00715071507151	0.00361010830325	0.0	0.00715071507151	0.0228640192539	0.001100110011	0.0023768366465
FBgn0010040	0.0198555956679	0.00180505415162	0.00715071507151	0.00361010830325	0.0	0.00715071507151	0.0228640192539	0.001100110011	0.0023768366465
FBgn0039905	0.0198555956679	0.00180505415162	0.0401869158879	0.00361010830325	0.0140186915888	0.0691588785047	0.0228640192539	0.0130841121495	0.0023768366465
[truncated: 2,627 more rows]

## Sheet: Wilczynski_Dataset_S4b
Gene	stage11-12	stage7-8	stage13-16	stage9-10	stage4-6
FBgn0035367	0.00770077007701	0.002200220022	0.0294825511432	0.001100110011	0.002200220022
FBgn0027563	0.00770077007701	0.002200220022	0.0294825511432	0.001100110011	0.002200220022
FBgn0027560	0.0682242990654	0.0317757009346	0.0910609857978	0.0429906542056	0.0308411214953
FBgn0027561	0.00860091743119	0.00401376146789	0.00846023688663	0.00630733944954	0.00286697247706
FBgn0036260	0.00770077007701	0.002200220022	0.0294825511432	0.001100110011	0.002200220022
FBgn0027569	0.00860091743119	0.00401376146789	0.00846023688663	0.00630733944954	0.00286697247706
FBgn0010434	0.0682242990654	0.0317757009346	0.00846023688663	0.0429906542056	0.0308411214953
FBgn0010435	0.00770077007701	0.002200220022	0.0910609857978	0.001100110011	0.002200220022
FBgn0036115	0.0682242990654	0.0317757009346	0.0910609857978	0.0429906542056	0.0308411214953
FBgn0033434	0.00860091743119	0.00401376146789	0.00846023688663	0.00630733944954	0.00286697247706
FBgn0033437	0.00770077007701	0.002200220022	0.0294825511432	0.001100110011	0.002200220022
FBgn0033431	0.0682242990654	0.0317757009346	0.0910609857978	0.0429906542056	0.0308411214953
FBgn0010431	0.0682242990654	0.0317757009346	0.0910609857978	0.0429906542056	0.0308411214953
FBgn0033439	0.00770077007701	0.002200220022	0.0294825511432	0.001100110011	0.002200220022
FBgn0015550	0.0682242990654	0.0317757009346	0.0910609857978	0.0429906542056	0.0308411214953
FBgn0033981	0.00770077007701	0.002200220022	0.0294825511432	0.001100110011	0.002200220022
FBgn0038243	0.0682242990654	0.0317757009346	0.0910609857978	0.0429906542056	0.0308411214953
FBgn0051233	0.00770077007701	0.002200220022	0.0294825511432	0.001100110011	0.002200220022
FBgn0036379	0.0682242990654	0.0317757009346	0.0294825511432	0.0429906542056	0.0308411214953
FBgn0033574	0.00770077007701	0.002200220022	0.0294825511432	0.001100110011	0.002200220022
FBgn0036373	0.00860091743119	0.00401376146789	0.00846023688663	0.00630733944954	0.00286697247706
FBgn0033980	0.00770077007701	0.002200220022	0.0294825511432	0.001100110011	0.002200220022
FBgn0036377	0.00770077007701	0.002200220022	0.0294825511432	0.001100110011	0.002200220022
FBgn0051908	0.00860091743119	0.00401376146789	0.00846023688663	0.00630733944954	0.00286697247706
FBgn0035034	0.00770077007701	0.002200220022	0.0910609857978	0.001100110011	0.002200220022
FBgn0026566	0.00860091743119	0.00401376146789	0.00846023688663	0.00630733944954	0.00286697247706
FBgn0005614	0.00770077007701	0.002200220022	0.0294825511432	0.001100110011	0.002200220022
FBgn0005616	0.00860091743119	0.00401376146789	0.00846023688663	0.00630733944954	0.00286697247706
FBgn0005617	0.00860091743119	0.00401376146789	0.00846023688663	0.00630733944954	0.00286697247706
FBgn0000370	0.00860091743119	0.00401376146789	0.00846023688663	0.00630733944954	0.00286697247706
FBgn0035872	0.00860091743119	0.00401376146789	0.00846023688663	0.00630733944954	0.00286697247706
FBgn0028646	0.00770077007701	0.002200220022	0.0910609857978	0.001100110011	0.002200220022
FBgn0028644	0.00770077007701	0.002200220022	0.0294825511432	0.001100110011	0.002200220022
FBgn0028645	0.00770077007701	0.002200220022	0.0294825511432	0.001100110011	0.002200220022
FBgn0028648	0.00860091743119	0.00401376146789	0.00846023688663	0.00630733944954	0.00286697247706
FBgn0025549	0.00860091743119	0.00401376146789	0.00846023688663	0.00630733944954	0.00286697247706
FBgn0032478	0.0682242990654	0.0317757009346	0.0294825511432	0.0429906542056	0.0308411214953
FBgn0032476	0.00860091743119	0.00401376146789	0.00846023688663	0.00630733944954	0.00286697247706
FBgn0032477	0.00860091743119	0.00401376146789	0.00846023688663	0.00630733944954	0.00286697247706
FBgn0032475	0.00860091743119	0.00401376146789	0.00846023688663	0.00630733944954	0.00286697247706
FBgn0032472	0.00770077007701	0.002200220022	0.0294825511432	0.001100110011	0.002200220022
FBgn0003046	0.00770077007701	0.002200220022	0.0294825511432	0.001100110011	0.002200220022
FBgn0003513	0.0682242990654	0.0317757009346	0.0294825511432	0.0429906542056	0.0308411214953
FBgn0003515	0.00770077007701	0.002200220022	0.0910609857978	0.001100110011	0.002200220022
FBgn0035296	0.00770077007701	0.002200220022	0.0294825511432	0.001100110011	0.002200220022
FBgn0035294	0.00860091743119	0.00401376146789	0.00846023688663	0.00630733944954	0.00286697247706
FBgn0052598	0.00770077007701	0.002200220022	0.0294825511432	0.001100110011	0.002200220022
FBgn0052594	0.0682242990654	0.0317757009346	0.00846023688663	0.0429906542056	0.0308411214953
FBgn0035207	0.00860091743119	0.00401376146789	0.00846023688663	0.00630733944954	0.00286697247706
FBgn0038405	0.00770077007701	0.002200220022	0.0294825511432	0.001100110011	0.002200220022
FBgn0035124	0.00770077007701	0.002200220022	0.0294825511432	0.001100110011	0.002200220022
FBgn0038407	0.00770077007701	0.002200220022	0.0294825511432	0.001100110011	0.002200220022
FBgn0035121	0.00860091743119	0.00401376146789	0.00846023688663	0.00630733944954	0.00286697247706
FBgn0035122	0.00860091743119	0.00401376146789	0.00846023688663	0.00630733944954	0.00286697247706
FBgn0031979	0.00860091743119	0.00401376146789	0.00846023688663	0.00630733944954	0.00286697247706
FBgn0031972	0.00860091743119	0.00401376146789	0.0910609857978	0.00630733944954	0.00286697247706
FBgn0031970	0.00770077007701	0.002200220022	0.0910609857978	0.001100110011	0.002200220022
FBgn0031971	0.00860091743119	0.00401376146789	0.00846023688663	0.00630733944954	0.00286697247706
FBgn0031975	0.00770077007701	0.002200220022	0.0294825511432	0.001100110011	0.002200220022
FBgn0034186	0.00860091743119	0.00401376146789	0.00846023688663	0.00630733944954	0.00286697247706
FBgn0038749	0.00770077007701	0.002200220022	0.0294825511432	0.001100110011	0.002200220022
FBgn0034181	0.00860091743119	0.00401376146789	0.00846023688663	0.00630733944954	0.00286697247706
FBgn0038742	0.00860091743119	0.00401376146789	0.0910609857978	0.00630733944954	0.00286697247706
FBgn0038747	0.00860091743119	0.00401376146789	0.00846023688663	0.00630733944954	0.00286697247706
FBgn0038745	0.0682242990654	0.0317757009346	0.0910609857978	0.0429906542056	0.0308411214953
FBgn0030511	0.0682242990654	0.0317757009346	0.0910609857978	0.0429906542056	0.0308411214953
FBgn0036967	0.00860091743119	0.00401376146789	0.00846023688663	0.00630733944954	0.00286697247706
FBgn0019650	0.0682242990654	0.0317757009346	0.0910609857978	0.0429906542056	0.0308411214953
FBgn0036111	0.00860091743119	0.00401376146789	0.00846023688663	0.00630733944954	0.00286697247706
FBgn0031608	0.00860091743119	0.00401376146789	0.00846023688663	0.00630733944954	0.00286697247706
FBgn0034989	0.00860091743119	0.00401376146789	0.00846023688663	0.00630733944954	0.00286697247706
FBgn0010229	0.00860091743119	0.00401376146789	0.00846023688663	0.00630733944954	0.00286697247706
FBgn0010225	0.0682242990654	0.0317757009346	0.0910609857978	0.0429906542056	0.0308411214953
FBgn0010222	0.0682242990654	0.0317757009346	0.00846023688663	0.0429906542056	0.0308411214953
FBgn0031606	0.00860091743119	0.00401376146789	0.00846023688663	0.00630733944954	0.00286697247706
FBgn0010220	0.00860091743119	0.00401376146789	0.00846023688663	0.00630733944954	0.00286697247706
FBgn0051739	0.00860091743119	0.00401376146789	0.00846023688663	0.00630733944954	0.00286697247706
FBgn0037188	0.00860091743119	0.00401376146789	0.00846023688663	0.00630733944954	0.00286697247706
FBgn0051223	0.0682242990654	0.0317757009346	0.0910609857978	0.0429906542056	0.0308411214953
FBgn0026577	0.00860091743119	0.00401376146789	0.00846023688663	0.00630733944954	0.00286697247706
FBgn0037185	0.00860091743119	0.00401376146789	0.0910609857978	0.00630733944954	0.00286697247706
FBgn0026573	0.00860091743119	0.00401376146789	0.00846023688663	0.00630733944954	0.00286697247706
FBgn0026570	0.00770077007701	0.002200220022	0.0294825511432	0.001100110011	0.002200220022
FBgn0037186	0.0682242990654	0.0317757009346	0.0910609857978	0.0429906542056	0.0308411214953
FBgn0000346	0.00770077007701	0.002200220022	0.0910609857978	0.001100110011	0.002200220022
FBgn0039433	0.00770077007701	0.002200220022	0.0294825511432	0.001100110011	0.002200220022
FBgn0039430	0.00770077007701	0.002200220022	0.0910609857978	0.001100110011	0.002200220022
FBgn0039437	0.00770077007701	0.002200220022	0.0294825511432	0.001100110011	0.002200220022
FBgn0039436	0.00770077007701	0.002200220022	0.0294825511432	0.001100110011	0.002200220022
FBgn0039435	0.00770077007701	0.002200220022	0.0294825511432	0.001100110011	0.002200220022
FBgn0039434	0.00770077007701	0.002200220022	0.0294825511432	0.001100110011	0.002200220022
FBgn0032111	0.00770077007701	0.002200220022	0.0294825511432	0.001100110011	0.002200220022
FBgn0032116	0.00770077007701	0.002200220022	0.0294825511432	0.001100110011	0.002200220022
FBgn0038498	0.00770077007701	0.002200220022	0.0294825511432	0.001100110011	0.002200220022
FBgn0043455	0.00860091743119	0.00401376146789	0.00846023688663	0.00630733944954	0.00286697247706
FBgn0038499	0.00860091743119	0.00401376146789	0.00846023688663	0.00630733944954	0.00286697247706
FBgn0037766	0.00770077007701	0.002200220022	0.0294825511432	0.001100110011	0.002200220022
FBgn0037760	0.00860091743119	0.00401376146789	0.00846023688663	0.00630733944954	0.00286697247706
FBgn0037763	0.00770077007701	0.002200220022	0.0294825511432	0.001100110011	0.002200220022
FBgn0032801	0.00860091743119	0.00401376146789	0.00846023688663	0.00630733944954	0.00286697247706
FBgn0032800	0.0682242990654	0.0317757009346	0.0910609857978	0.0429906542056	0.0308411214953
FBgn0050172	0.0682242990654	0.0317757009346	0.0910609857978	0.0429906542056	0.0308411214953
FBgn0020506	0.00770077007701	0.002200220022	0.0294825511432	0.001100110011	0.002200220022
FBgn0003870	0.00860091743119	0.00401376146789	0.00846023688663	0.00630733944954	0.00286697247706
FBgn0031030	0.00860091743119	0.00401376146789	0.00846023688663	0.00630733944954	0.00286697247706
FBgn0030467	0.00860091743119	0.00401376146789	0.00846023688663	0.00630733944954	0.00286697247706
FBgn0030465	0.00860091743119	0.00401376146789	0.00846023688663	0.00630733944954	0.00286697247706
FBgn0024558	0.00860091743119	0.00401376146789	0.00846023688663	0.00630733944954	0.00286697247706
FBgn0035461	0.0682242990654	0.0317757009346	0.0910609857978	0.0429906542056	0.0308411214953
FBgn0035462	0.00860091743119	0.00401376146789	0.00846023688663	0.00630733944954	0.00286697247706
FBgn0020642	0.00770077007701	0.002200220022	0.0294825511432	0.001100110011	0.002200220022
FBgn0020643	0.00770077007701	0.002200220022	0.0294825511432	0.001100110011	0.002200220022
FBgn0020641	0.00770077007701	0.002200220022	0.0294825511432	0.001100110011	0.002200220022
FBgn0033602	0.00770077007701	0.002200220022	0.0294825511432	0.001100110011	0.002200220022
FBgn0033607	0.00860091743119	0.00401376146789	0.00846023688663	0.00630733944954	0.00286697247706
FBgn0024889	0.00860091743119	0.00401376146789	0.00846023688663	0.00630733944954	0.00286697247706
FBgn0030606	0.00860091743119	0.00401376146789	0.00846023688663	0.00630733944954	0.00286697247706
FBgn0040823	0.00770077007701	0.002200220022	0.0294825511432	0.001100110011	0.002200220022
FBgn0052102	0.0682242990654	0.0317757009346	0.0294825511432	0.0429906542056	0.0308411214953
FBgn0052105	0.0682242990654	0.0317757009346	0.0294825511432	0.0429906542056	0.0308411214953
FBgn0025680	0.00770077007701	0.002200220022	0.0294825511432	0.001100110011	0.002200220022
FBgn0025683	0.0682242990654	0.0317757009346	0.0910609857978	0.0429906542056	0.0308411214953
FBgn0014022	0.00860091743119	0.00401376146789	0.00846023688663	0.00630733944954	0.00286697247706
FBgn0034564	0.00860091743119	0.00401376146789	0.00846023688663	0.00630733944954	0.00286697247706
FBgn0043470	0.00770077007701	0.002200220022	0.0294825511432	0.001100110011	0.002200220022
FBgn0010173	0.00860091743119	0.00401376146789	0.0910609857978	0.00630733944954	0.00286697247706
FBgn0030608	0.0682242990654	0.0317757009346	0.0910609857978	0.0429906542056	0.0308411214953
FBgn0003187	0.0682242990654	0.0317757009346	0.0910609857978	0.0429906542056	0.0308411214953
FBgn0037974	0.00770077007701	0.002200220022	0.0294825511432	0.001100110011	0.002200220022
FBgn0037975	0.00770077007701	0.002200220022	0.0294825511432	0.001100110011	0.002200220022
FBgn0037976	0.00770077007701	0.002200220022	0.0294825511432	0.001100110011	0.002200220022
FBgn0000578	0.00860091743119	0.00401376146789	0.00846023688663	0.00630733944954	0.00286697247706
FBgn0000577	0.0682242990654	0.0317757009346	0.0910609857978	0.0429906542056	0.0308411214953
FBgn0037063	0.0682242990654	0.0317757009346	0.0910609857978	0.0429906542056	0.0308411214953
FBgn0039601	0.00860091743119	0.00401376146789	0.00846023688663	0.00630733944954	0.00286697247706
FBgn0030724	0.0682242990654	0.0317757009346	0.0910609857978	0.0429906542056	0.0308411214953
FBgn0030720	0.00860091743119	0.00401376146789	0.00846023688663	0.00630733944954	0.00286697247706
FBgn0030721	0.0682242990654	0.0317757009346	0.0910609857978	0.0429906542056	0.0308411214953
FBgn0030723	0.00770077007701	0.002200220022	0.0294825511432	0.001100110011	0.002200220022
FBgn0029905	0.00860091743119	0.00401376146789	0.00846023688663	0.00630733944954	0.00286697247706
FBgn0029909	0.00770077007701	0.002200220022	0.0294825511432	0.001100110011	0.002200220022
FBgn0051032	0.00860091743119	0.00401376146789	0.0910609857978	0.00630733944954	0.00286697247706
FBgn0051036	0.00770077007701	0.002200220022	0.0294825511432	0.001100110011	0.002200220022
FBgn0051038	0.0682242990654	0.0317757009346	0.0910609857978	0.0429906542056	0.0308411214953
FBgn0050342	0.00860091743119	0.00401376146789	0.00846023688663	0.00630733944954	0.00286697247706
FBgn0050344	0.00860091743119	0.00401376146789	0.00846023688663	0.00630733944954	0.00286697247706
FBgn0027504	0.00860091743119	0.00401376146789	0.00846023688663	0.00630733944954	0.00286697247706
FBgn0027506	0.0682242990654	0.0317757009346	0.00846023688663	0.0429906542056	0.0308411214953
FBgn0027507	0.00860091743119	0.00401376146789	0.00846023688663	0.00630733944954	0.00286697247706
FBgn0027503	0.00860091743119	0.00401376146789	0.00846023688663	0.00630733944954	0.00286697247706
FBgn0029822	0.00860091743119	0.00401376146789	0.00846023688663	0.00630733944954	0.00286697247706
FBgn0028902	0.00770077007701	0.002200220022	0.0294825511432	0.001100110011	0.002200220022
FBgn0052843	0.00770077007701	0.002200220022	0.0294825511432	0.001100110011	0.002200220022
FBgn0032848	0.00860091743119	0.00401376146789	0.00846023688663	0.00630733944954	0.00286697247706
FBgn0037518	0.00770077007701	0.002200220022	0.0910609857978	0.001100110011	0.002200220022
FBgn0030239	0.00860091743119	0.00401376146789	0.00846023688663	0.00630733944954	0.00286697247706
FBgn0037513	0.00770077007701	0.002200220022	0.0910609857978	0.001100110011	0.002200220022
FBgn0030237	0.0682242990654	0.0317757009346	0.0910609857978	0.0429906542056	0.0308411214953
FBgn0030234	0.0682242990654	0.0317757009346	0.0294825511432	0.0429906542056	0.0308411214953
FBgn0030235	0.0682242990654	0.0317757009346	0.0910609857978	0.0429906542056	0.0308411214953
FBgn0024912	0.0682242990654	0.0317757009346	0.0910609857978	0.0429906542056	0.0308411214953
FBgn0033457	0.00860091743119	0.00401376146789	0.00846023688663	0.00630733944954	0.00286697247706
FBgn0033452	0.00860091743119	0.00401376146789	0.00846023688663	0.00630733944954	0.00286697247706
FBgn0033451	0.0682242990654	0.0317757009346	0.0294825511432	0.0429906542056	0.0308411214953
FBgn0038269	0.00860091743119	0.00401376146789	0.00846023688663	0.00630733944954	0.00286697247706
FBgn0051698	0.00770077007701	0.002200220022	0.0294825511432	0.001100110011	0.002200220022
FBgn0040732	0.00770077007701	0.002200220022	0.0294825511432	0.001100110011	0.002200220022
FBgn0038266	0.00770077007701	0.002200220022	0.0294825511432	0.001100110011	0.002200220022
FBgn0035020	0.00860091743119	0.00401376146789	0.00846023688663	0.00630733944954	0.00286697247706
FBgn0035021	0.00860091743119	0.00401376146789	0.00846023688663	0.00630733944954	0.00286697247706
FBgn0035022	0.00770077007701	0.002200220022	0.0294825511432	0.001100110011	0.002200220022
FBgn0005586	0.00770077007701	0.002200220022	0.0910609857978	0.001100110011	0.002200220022
FBgn0036390	0.00770077007701	0.002200220022	0.0294825511432	0.001100110011	0.002200220022
FBgn0036396	0.00860091743119	0.00401376146789	0.0910609857978	0.00630733944954	0.00286697247706
FBgn0036395	0.00860091743119	0.00401376146789	0.00846023688663	0.00630733944954	0.00286697247706
FBgn0035027	0.00860091743119	0.00401376146789	0.00846023688663	0.00630733944954	0.00286697247706
FBgn0004181	0.00770077007701	0.002200220022	0.0294825511432	0.001100110011	0.002200220022
FBgn0029506	0.00860091743119	0.00401376146789	0.00846023688663	0.00630733944954	0.00286697247706
FBgn0023507	0.0682242990654	0.0317757009346	0.0910609857978	0.0429906542056	0.0308411214953
FBgn0023508	0.00860091743119	0.00401376146789	0.00846023688663	0.00630733944954	0.00286697247706
FBgn0023509	0.00860091743119	0.00401376146789	0.00846023688663	0.00630733944954	0.00286697247706
FBgn0035853	0.00860091743119	0.00401376146789	0.00846023688663	0.00630733944954	0.00286697247706
FBgn0035852	0.0682242990654	0.0317757009346	0.0910609857978	0.0429906542056	0.0308411214953
FBgn0035855	0.00770077007701	0.002200220022	0.0294825511432	0.001100110011	0.002200220022
FBgn0035857	0.00770077007701	0.002200220022	0.0294825511432	0.001100110011	0.002200220022
FBgn0035856	0.00770077007701	0.002200220022	0.0294825511432	0.001100110011	0.002200220022
FBgn0035859	0.00770077007701	0.002200220022	0.0294825511432	0.001100110011	0.002200220022
FBgn0028622	0.0682242990654	0.0317757009346	0.0910609857978	0.0429906542056	0.0308411214953
FBgn0032494	0.00770077007701	0.002200220022	0.0294825511432	0.001100110011	0.002200220022
FBgn0032495	0.00770077007701	0.002200220022	0.0294825511432	0.001100110011	0.002200220022
FBgn0032840	0.00770077007701	0.002200220022	0.0294825511432	0.001100110011	0.002200220022
FBgn0053196	0.0682242990654	0.0317757009346	0.0910609857978	0.0429906542056	0.0308411214953
FBgn0036117	0.0682242990654	0.0317757009346	0.00846023688663	0.0429906542056	0.0308411214953
FBgn0053191	0.00770077007701	0.002200220022	0.0294825511432	0.001100110011	0.002200220022
FBgn0053193	0.00860091743119	0.00401376146789	0.00846023688663	0.00630733944954	0.00286697247706
FBgn0005636	0.0682242990654	0.0317757009346	0.0910609857978	0.0429906542056	0.0308411214953
FBgn0005632	0.0682242990654	0.0317757009346	0.00846023688663	0.0429906542056	0.0308411214953
FBgn0005633	0.00770077007701	0.002200220022	0.0910609857978	0.001100110011	0.002200220022
FBgn0005630	0.00860091743119	0.00401376146789	0.00846023688663	0.00630733944954	0.00286697247706
FBgn0003065	0.00770077007701	0.002200220022	0.0294825511432	0.001100110011	0.002200220022
FBgn0003067	0.0682242990654	0.0317757009346	0.0294825511432	0.0429906542056	0.0308411214953
FBgn0031435	0.0682242990654	0.0317757009346	0.0910609857978	0.0429906542056	0.0308411214953
FBgn0029573	0.0682242990654	0.0317757009346	0.0294825511432	0.0429906542056	0.0308411214953
FBgn0022073	0.0682242990654	0.0317757009346	0.0910609857978	0.0429906542056	0.0308411214953
FBgn0028862	0.0682242990654	0.0317757009346	0.0910609857978	0.0429906542056	0.0308411214953
FBgn0031434	0.0682242990654	0.0317757009346	0.0910609857978	0.0429906542056	0.0308411214953
FBgn0035147	0.00860091743119	0.00401376146789	0.00846023688663	0.00630733944954	0.00286697247706
FBgn0020368	0.00860091743119	0.00401376146789	0.00846023688663	0.00630733944954	0.00286697247706
FBgn0039509	0.00860091743119	0.00401376146789	0.00846023688663	0.00630733944954	0.00286697247706
FBgn0020367	0.0682242990654	0.0317757009346	0.00846023688663	0.0429906542056	0.0308411214953
FBgn0035148	0.00860091743119	0.00401376146789	0.00846023688663	0.00630733944954	0.00286697247706
FBgn0024321	0.00770077007701	0.002200220022	0.0294825511432	0.001100110011	0.002200220022
FBgn0014184	0.00860091743119	0.00401376146789	0.00846023688663	0.00630733944954	0.00286697247706
FBgn0031918	0.00770077007701	0.002200220022	0.0294825511432	0.001100110011	0.002200220022
FBgn0034439	0.00770077007701	0.002200220022	0.0294825511432	0.001100110011	0.002200220022
FBgn0034436	0.0682242990654	0.0317757009346	0.0910609857978	0.0429906542056	0.0308411214953
FBgn0031910	0.00770077007701	0.002200220022	0.0294825511432	0.001100110011	0.002200220022
FBgn0031913	0.0682242990654	0.0317757009346	0.0910609857978	0.0429906542056	0.0308411214953
FBgn0036704	0.00770077007701	0.002200220022	0.0294825511432	0.001100110011	0.002200220022
FBgn0038720	0.0682242990654	0.0317757009346	0.0910609857978	0.0429906542056	0.0308411214953
FBgn0036706	0.00770077007701	0.002200220022	0.0294825511432	0.001100110011	0.002200220022
FBgn0038722	0.00860091743119	0.00401376146789	0.00846023688663	0.00630733944954	0.00286697247706
FBgn0038723	0.0682242990654	0.0317757009346	0.0910609857978	0.0429906542056	0.0308411214953
FBgn0030537	0.00770077007701	0.002200220022	0.0294825511432	0.001100110011	0.002200220022
FBgn0030536	0.00770077007701	0.002200220022	0.0294825511432	0.001100110011	0.002200220022
FBgn0036941	0.00770077007701	0.002200220022	0.0294825511432	0.001100110011	0.002200220022
FBgn0015321	0.0682242990654	0.0317757009346	0.00846023688663	0.0429906542056	0.0308411214953
FBgn0031621	0.00770077007701	0.002200220022	0.0294825511432	0.001100110011	0.002200220022
FBgn0015324	0.00860091743119	0.00401376146789	0.00846023688663	0.00630733944954	0.00286697247706
FBgn0031629	0.00770077007701	0.002200220022	0.0910609857978	0.001100110011	0.002200220022
FBgn0038095	0.00770077007701	0.002200220022	0.0294825511432	0.001100110011	0.002200220022
FBgn0039354	0.00770077007701	0.002200220022	0.0294825511432	0.001100110011	0.002200220022
FBgn0038098	0.00770077007701	0.002200220022	0.0294825511432	0.001100110011	0.002200220022
FBgn0038099	0.00770077007701	0.002200220022	0.0294825511432	0.001100110011	0.002200220022
FBgn0039352	0.00860091743119	0.00401376146789	0.00846023688663	0.00630733944954	0.00286697247706
FBgn0031453	0.00860091743119	0.00401376146789	0.00846023688663	0.00630733944954	0.00286697247706
FBgn0032029	0.0682242990654	0.0317757009346	0.0910609857978	0.0429906542056	0.0308411214953
FBgn0031320	0.00860091743119	0.00401376146789	0.00846023688663	0.00630733944954	0.00286697247706
FBgn0031327	0.00770077007701	0.002200220022	0.0294825511432	0.001100110011	0.002200220022
FBgn0040385	0.0682242990654	0.0317757009346	0.0910609857978	0.0429906542056	0.0308411214953
FBgn0051759	0.00770077007701	0.002200220022	0.0910609857978	0.001100110011	0.002200220022
FBgn0040383	0.0682242990654	0.0317757009346	0.0294825511432	0.0429906542056	0.0308411214953
FBgn0040382	0.00860091743119	0.00401376146789	0.00846023688663	0.00630733944954	0.00286697247706
FBgn0051207	0.00770077007701	0.002200220022	0.0294825511432	0.001100110011	0.002200220022
FBgn0040388	0.00860091743119	0.00401376146789	0.00846023688663	0.00630733944954	0.00286697247706
FBgn0037163	0.00770077007701	0.002200220022	0.0294825511432	0.001100110011	0.002200220022
FBgn0026592	0.00770077007701	0.002200220022	0.0910609857978	0.001100110011	0.002200220022
FBgn0026593	0.00770077007701	0.002200220022	0.0294825511432	0.001100110011	0.002200220022
FBgn0030398	0.00770077007701	0.002200220022	0.0294825511432	0.001100110011	0.002200220022
FBgn0037165	0.00770077007701	0.002200220022	0.0294825511432	0.001100110011	0.002200220022
FBgn0030394	0.00770077007701	0.002200220022	0.0910609857978	0.001100110011	0.002200220022
FBgn0037169	0.00770077007701	0.002200220022	0.0294825511432	0.001100110011	0.002200220022
FBgn0000326	0.0682242990654	0.0317757009346	0.0910609857978	0.0429906542056	0.0308411214953
FBgn0000320	0.0682242990654	0.0317757009346	0.0910609857978	0.0429906542056	0.0308411214953
FBgn0016983	0.00860091743119	0.00401376146789	0.00846023688663	0.00630733944954	0.00286697247706
FBgn0016984	0.00860091743119	0.00401376146789	0.00846023688663	0.00630733944954	0.00286697247706
FBgn0033842	0.00860091743119	0.00401376146789	0.00846023688663	0.00630733944954	0.00286697247706
FBgn0039417	0.0682242990654	0.0317757009346	0.00846023688663	0.0429906542056	0.0308411214953
FBgn0037705	0.00860091743119	0.00401376146789	0.00846023688663	0.00630733944954	0.00286697247706
FBgn0030323	0.0682242990654	0.0317757009346	0.00846023688663	0.0429906542056	0.0308411214953
FBgn0037700	0.00860091743119	0.00401376146789	0.00846023688663	0.00630733944954	0.00286697247706
FBgn0037709	0.00860091743119	0.00401376146789	0.00846023688663	0.00630733944954	0.00286697247706
FBgn0037708	0.0682242990654	0.0317757009346	0.0910609857978	0.0429906542056	0.0308411214953
FBgn0030326	0.00770077007701	0.002200220022	0.0294825511432	0.001100110011	0.002200220022
FBgn0030327	0.00860091743119	0.00401376146789	0.00846023688663	0.00630733944954	0.00286697247706
FBgn0031141	0.00770077007701	0.002200220022	0.0294825511432	0.001100110011	0.002200220022
FBgn0004510	0.00860091743119	0.00401376146789	0.00846023688663	0.00630733944954	0.00286697247706
FBgn0004512	0.0682242990654	0.0317757009346	0.0294825511432	0.0429906542056	0.0308411214953
FBgn0004513	0.00770077007701	0.002200220022	0.0294825511432	0.001100110011	0.002200220022
FBgn0004047	0.0682242990654	0.0317757009346	0.0294825511432	0.0429906542056	0.0308411214953
FBgn0004516	0.00770077007701	0.002200220022	0.0910609857978	0.001100110011	0.002200220022
FBgn0004045	0.00770077007701	0.002200220022	0.0294825511432	0.001100110011	0.002200220022
FBgn0034315	0.00860091743119	0.00401376146789	0.00846023688663	0.00630733944954	0.00286697247706
FBgn0034314	0.0682242990654	0.0317757009346	0.0910609857978	0.0429906542056	0.0308411214953
FBgn0050403	0.00770077007701	0.002200220022	0.0910609857978	0.001100110011	0.002200220022
FBgn0050158	0.00770077007701	0.002200220022	0.0294825511432	0.001100110011	0.002200220022
FBgn0050404	0.00860091743119	0.00401376146789	0.00846023688663	0.00630733944954	0.00286697247706
FBgn0050151	0.00770077007701	0.002200220022	0.0294825511432	0.001100110011	0.002200220022
FBgn0003896	0.0682242990654	0.0317757009346	0.0910609857978	0.0429906542056	0.0308411214953
FBgn0011236	0.0682242990654	0.0317757009346	0.0910609857978	0.0429906542056	0.0308411214953
FBgn0020626	0.00860091743119	0.00401376146789	0.00846023688663	0.00630733944954	0.00286697247706
FBgn0020620	0.00860091743119	0.00401376146789	0.00846023688663	0.00630733944954	0.00286697247706
FBgn0020622	0.00860091743119	0.00401376146789	0.00846023688663	0.00630733944954	0.00286697247706
FBgn0020623	0.00770077007701	0.002200220022	0.0294825511432	0.001100110011	0.002200220022
FBgn0033667	0.00770077007701	0.002200220022	0.0294825511432	0.001100110011	0.002200220022
FBgn0011581	0.00770077007701	0.002200220022	0.0294825511432	0.001100110011	0.002200220022
FBgn0033668	0.00770077007701	0.002200220022	0.0910609857978	0.001100110011	0.002200220022
FBgn0033669	0.00860091743119	0.00401376146789	0.00846023688663	0.00630733944954	0.00286697247706
FBgn0032393	0.0682242990654	0.0317757009346	0.0910609857978	0.0429906542056	0.0308411214953
FBgn0032390	0.00860091743119	0.00401376146789	0.00846023688663	0.00630733944954	0.00286697247706
FBgn0035626	0.0682242990654	0.0317757009346	0.0910609857978	0.0429906542056	0.0308411214953
FBgn0035627	0.00860091743119	0.00401376146789	0.0910609857978	0.00630733944954	0.00286697247706
FBgn0035625	0.0682242990654	0.0317757009346	0.0910609857978	0.0429906542056	0.0308411214953
FBgn0035622	0.00860091743119	0.00401376146789	0.00846023688663	0.00630733944954	0.00286697247706
FBgn0035623	0.00770077007701	0.002200220022	0.0910609857978	0.001100110011	0.002200220022
FBgn0035620	0.00770077007701	0.002200220022	0.0294825511432	0.001100110011	0.002200220022
FBgn0003514	0.00860091743119	0.00401376146789	0.00846023688663	0.00630733944954	0.00286697247706
FBgn0003517	0.00860091743119	0.00401376146789	0.00846023688663	0.00630733944954	0.00286697247706
FBgn0013725	0.0682242990654	0.0317757009346	0.0910609857978	0.0429906542056	0.0308411214953
FBgn0002023	0.00770077007701	0.002200220022	0.0910609857978	0.001100110011	0.002200220022
FBgn0037556	0.00860091743119	0.00401376146789	0.00846023688663	0.00630733944954	0.00286697247706
FBgn0039259	0.00860091743119	0.00401376146789	0.00846023688663	0.00630733944954	0.00286697247706
FBgn0032538	0.00770077007701	0.002200220022	0.0294825511432	0.001100110011	0.002200220022
FBgn0032283	0.00770077007701	0.002200220022	0.0294825511432	0.001100110011	0.002200220022
FBgn0039251	0.00770077007701	0.002200220022	0.0294825511432	0.001100110011	0.002200220022
FBgn0039254	0.00860091743119	0.00401376146789	0.00846023688663	0.00630733944954	0.00286697247706
FBgn0029749	0.00770077007701	0.002200220022	0.0294825511432	0.001100110011	0.002200220022
FBgn0037958	0.00860091743119	0.00401376146789	0.00846023688663	0.00630733944954	0.00286697247706
FBgn0003308	0.0682242990654	0.0317757009346	0.0910609857978	0.0429906542056	0.0308411214953
FBgn0039629	0.00770077007701	0.002200220022	0.0294825511432	0.001100110011	0.002200220022
FBgn0003300	0.0682242990654	0.0317757009346	0.0910609857978	0.0429906542056	0.0308411214953
FBgn0003302	0.00860091743119	0.00401376146789	0.00846023688663	0.00630733944954	0.00286697247706
FBgn0039626	0.00860091743119	0.00401376146789	0.00846023688663	0.00630733944954	0.00286697247706
FBgn0039625	0.00860091743119	0.00401376146789	0.0910609857978	0.00630733944954	0.00286697247706
FBgn0001145	0.0682242990654	0.0317757009346	0.0294825511432	0.0429906542056	0.0308411214953
FBgn0023444	0.00860091743119	0.00401376146789	0.00846023688663	0.00630733944954	0.00286697247706
FBgn0015024	0.00860091743119	0.00401376146789	0.00846023688663	0.00630733944954	0.00286697247706
FBgn0016641	0.00860091743119	0.00401376146789	0.00846023688663	0.00630733944954	0.00286697247706
FBgn0032336	0.00770077007701	0.002200220022	0.0294825511432	0.001100110011	0.002200220022
FBgn0029969	0.0682242990654	0.0317757009346	0.00846023688663	0.0429906542056	0.0308411214953
FBgn0010269	0.00860091743119	0.00401376146789	0.00846023688663	0.00630733944954	0.00286697247706
FBgn0027526	0.00860091743119	0.00401376146789	0.00846023688663	0.00630733944954	0.00286697247706
FBgn0027527	0.00770077007701	0.002200220022	0.0294825511432	0.001100110011	0.002200220022
FBgn0027524	0.00860091743119	0.00401376146789	0.00846023688663	0.00630733944954	0.00286697247706
FBgn0027525	0.00860091743119	0.00401376146789	0.00846023688663	0.00630733944954	0.00286697247706
FBgn0027521	0.00860091743119	0.00401376146789	0.0910609857978	0.00630733944954	0.00286697247706
FBgn0034378	0.00770077007701	0.002200220022	0.0294825511432	0.001100110011	0.002200220022
FBgn0034372	0.00860091743119	0.00401376146789	0.00846023688663	0.00630733944954	0.00286697247706
FBgn0034371	0.0682242990654	0.0317757009346	0.0910609857978	0.0429906542056	0.0308411214953
FBgn0034374	0.00770077007701	0.002200220022	0.0294825511432	0.001100110011	0.002200220022
FBgn0030259	0.00770077007701	0.002200220022	0.0294825511432	0.001100110011	0.002200220022
FBgn0036951	0.00770077007701	0.002200220022	0.0294825511432	0.001100110011	0.002200220022
FBgn0030704	0.00860091743119	0.00401376146789	0.00846023688663	0.00630733944954	0.00286697247706
FBgn0037572	0.0682242990654	0.0317757009346	0.0294825511432	0.0429906542056	0.0308411214953
FBgn0037573	0.00860091743119	0.00401376146789	0.00846023688663	0.00630733944954	0.00286697247706
FBgn0033471	0.00860091743119	0.00401376146789	0.00846023688663	0.00630733944954	0.00286697247706
FBgn0036152	0.0682242990654	0.0317757009346	0.0294825511432	0.0429906542056	0.0308411214953
FBgn0033475	0.0682242990654	0.0317757009346	0.0910609857978	0.0429906542056	0.0308411214953
FBgn0033474	0.00860091743119	0.00401376146789	0.00846023688663	0.00630733944954	0.00286697247706
FBgn0033477	0.00860091743119	0.00401376146789	0.00846023688663	0.00630733944954	0.00286697247706
FBgn0015040	0.00770077007701	0.002200220022	0.0294825511432	0.001100110011	0.002200220022
FBgn0026438	0.00770077007701	0.002200220022	0.0294825511432	0.001100110011	0.002200220022
FBgn0026433	0.00860091743119	0.00401376146789	0.00846023688663	0.00630733944954	0.00286697247706
FBgn0026432	0.00860091743119	0.00401376146789	0.00846023688663	0.00630733944954	0.00286697247706
FBgn0026431	0.00860091743119	0.00401376146789	0.0910609857978	0.00630733944954	0.00286697247706
FBgn0026430	0.00860091743119	0.00401376146789	0.00846023688663	0.00630733944954	0.00286697247706
FBgn0050362	0.00770077007701	0.002200220022	0.0294825511432	0.001100110011	0.002200220022
FBgn0031478	0.00860091743119	0.00401376146789	0.00846023688663	0.00630733944954	0.00286697247706
FBgn0021800	0.0682242990654	0.0317757009346	0.0910609857978	0.0429906542056	0.0308411214953
FBgn0030873	0.00860091743119	0.00401376146789	0.00846023688663	0.00630733944954	0.00286697247706
FBgn0030874	0.00860091743119	0.00401376146789	0.00846023688663	0.00630733944954	0.00286697247706
FBgn0030877	0.00860091743119	0.00401376146789	0.00846023688663	0.00630733944954	0.00286697247706
FBgn0050090	0.00770077007701	0.002200220022	0.0294825511432	0.001100110011	0.002200220022
FBgn0032700	0.00860091743119	0.00401376146789	0.00846023688663	0.00630733944954	0.00286697247706
FBgn0023529	0.00860091743119	0.00401376146789	0.00846023688663	0.00630733944954	0.00286697247706
FBgn0032705	0.00860091743119	0.00401376146789	0.00846023688663	0.00630733944954	0.00286697247706
FBgn0023522	0.00860091743119	0.00401376146789	0.00846023688663	0.00630733944954	0.00286697247706
FBgn0023521	0.00860091743119	0.00401376146789	0.00846023688663	0.00630733944954	0.00286697247706
FBgn0023526	0.00860091743119	0.00401376146789	0.00846023688663	0.00630733944954	0.00286697247706
FBgn0023525	0.0682242990654	0.0317757009346	0.0910609857978	0.0429906542056	0.0308411214953
FBgn0035551	0.00770077007701	0.002200220022	0.0294825511432	0.001100110011	0.002200220022
FBgn0035886	0.00770077007701	0.002200220022	0.0294825511432	0.001100110011	0.002200220022
FBgn0038401	0.00860091743119	0.00401376146789	0.00846023688663	0.00630733944954	0.00286697247706
FBgn0035557	0.00770077007701	0.002200220022	0.0294825511432	0.001100110011	0.002200220022
FBgn0001269	0.0682242990654	0.0317757009346	0.0910609857978	0.0429906542056	0.0308411214953
FBgn0001263	0.00770077007701	0.002200220022	0.0294825511432	0.001100110011	0.002200220022
FBgn0032350	0.00770077007701	0.002200220022	0.0294825511432	0.001100110011	0.002200220022
FBgn0024273	0.00860091743119	0.00401376146789	0.00846023688663	0.00630733944954	0.00286697247706
FBgn0033367	0.00770077007701	0.002200220022	0.0294825511432	0.001100110011	0.002200220022
FBgn0029003	0.0682242990654	0.0317757009346	0.0910609857978	0.0429906542056	0.0308411214953
FBgn0022724	0.00860091743119	0.00401376146789	0.00846023688663	0.00630733944954	0.00286697247706
FBgn0035169	0.00860091743119	0.00401376146789	0.00846023688663	0.00630733944954	0.00286697247706
FBgn0030817	0.00770077007701	0.002200220022	0.0294825511432	0.001100110011	0.002200220022
FBgn0035165	0.00860091743119	0.00401376146789	0.00846023688663	0.00630733944954	0.00286697247706
FBgn0035167	0.0682242990654	0.0317757009346	0.0910609857978	0.0429906542056	0.0308411214953
FBgn0020381	0.00860091743119	0.00401376146789	0.00846023688663	0.00630733944954	0.00286697247706
FBgn0033159	0.0682242990654	0.0317757009346	0.0910609857978	0.0429906542056	0.0308411214953
FBgn0020386	0.00860091743119	0.00401376146789	0.0910609857978	0.00630733944954	0.00286697247706
FBgn0020389	0.0682242990654	0.0317757009346	0.00846023688663	0.0429906542056	0.0308411214953
FBgn0033368	0.00770077007701	0.002200220022	0.0294825511432	0.001100110011	0.002200220022
FBgn0024285	0.00860091743119	0.00401376146789	0.00846023688663	0.00630733944954	0.00286697247706
FBgn0030810	0.00770077007701	0.002200220022	0.0294825511432	0.001100110011	0.002200220022
FBgn0034453	0.00860091743119	0.00401376146789	0.00846023688663	0.00630733944954	0.00286697247706
FBgn0031393	0.0682242990654	0.0317757009346	0.0294825511432	0.0429906542056	0.0308411214953
FBgn0031397	0.00770077007701	0.002200220022	0.0910609857978	0.001100110011	0.002200220022
FBgn0031395	0.00860091743119	0.00401376146789	0.00846023688663	0.00630733944954	0.00286697247706
FBgn0031428	0.00860091743119	0.00401376146789	0.00846023688663	0.00630733944954	0.00286697247706
FBgn0031398	0.00860091743119	0.00401376146789	0.00846023688663	0.00630733944954	0.00286697247706
FBgn0034418	0.00860091743119	0.00401376146789	0.00846023688663	0.00630733944954	0.00286697247706
FBgn0038700	0.00770077007701	0.002200220022	0.0294825511432	0.001100110011	0.002200220022
FBgn0038701	0.00770077007701	0.002200220022	0.0294825511432	0.001100110011	0.002200220022
FBgn0038708	0.00770077007701	0.002200220022	0.0910609857978	0.001100110011	0.002200220022
FBgn0038709	0.00770077007701	0.002200220022	0.0294825511432	0.001100110011	0.002200220022
FBgn0052373	0.00770077007701	0.002200220022	0.0294825511432	0.001100110011	0.002200220022
FBgn0052372	0.0682242990654	0.0317757009346	0.0910609857978	0.0429906542056	0.0308411214953
FBgn0034187	0.0682242990654	0.0317757009346	0.00846023688663	0.0429906542056	0.0308411214953
FBgn0010825	0.00860091743119	0.00401376146789	0.00846023688663	0.00630733944954	0.00286697247706
FBgn0031644	0.00770077007701	0.002200220022	0.0294825511432	0.001100110011	0.002200220022
FBgn0010774	0.00860091743119	0.00401376146789	0.00846023688663	0.00630733944954	0.00286697247706
FBgn0031646	0.00770077007701	0.002200220022	0.0294825511432	0.001100110011	0.002200220022
FBgn0026602	0.00770077007701	0.002200220022	0.0910609857978	0.001100110011	0.002200220022
FBgn0047199	0.00770077007701	0.002200220022	0.0294825511432	0.001100110011	0.002200220022
FBgn0000568	0.0682242990654	0.0317757009346	0.0910609857978	0.0429906542056	0.0308411214953
FBgn0000658	0.0682242990654	0.0317757009346	0.0910609857978	0.0429906542056	0.0308411214953
FBgn0025807	0.00860091743119	0.00401376146789	0.00846023688663	0.00630733944954	0.00286697247706
FBgn0000303	0.00770077007701	0.002200220022	0.0910609857978	0.001100110011	0.002200220022
FBgn0000307	0.00860091743119	0.00401376146789	0.00846023688663	0.00630733944954	0.00286697247706
FBgn0011280	0.0682242990654	0.0317757009346	0.0294825511432	0.0429906542056	0.0308411214953
FBgn0011286	0.0682242990654	0.0317757009346	0.0910609857978	0.0429906542056	0.0308411214953
FBgn0033867	0.00770077007701	0.002200220022	0.0294825511432	0.001100110011	0.002200220022
FBgn0033865	0.00770077007701	0.002200220022	0.0294825511432	0.001100110011	0.002200220022
FBgn0039476	0.00770077007701	0.002200220022	0.0294825511432	0.001100110011	0.002200220022
FBgn0039475	0.00770077007701	0.002200220022	0.0294825511432	0.001100110011	0.002200220022
FBgn0039474	0.00770077007701	0.002200220022	0.0294825511432	0.001100110011	0.002200220022
FBgn0039473	0.00770077007701	0.002200220022	0.0294825511432	0.001100110011	0.002200220022
FBgn0039471	0.00770077007701	0.002200220022	0.0294825511432	0.001100110011	0.002200220022
FBgn0039470	0.00770077007701	0.002200220022	0.0294825511432	0.001100110011	0.002200220022
FBgn0035771	0.00860091743119	0.00401376146789	0.00846023688663	0.00630733944954	0.00286697247706
FBgn0037721	0.00770077007701	0.002200220022	0.0294825511432	0.001100110011	0.002200220022
FBgn0037723	0.0682242990654	0.0317757009346	0.0910609857978	0.0429906542056	0.0308411214953
FBgn0037727	0.00770077007701	0.002200220022	0.0294825511432	0.001100110011	0.002200220022
FBgn0031574	0.0682242990654	0.0317757009346	0.0910609857978	0.0429906542056	0.0308411214953
FBgn0036422	0.00770077007701	0.002200220022	0.0294825511432	0.001100110011	0.002200220022
FBgn0004028	0.00770077007701	0.002200220022	0.0910609857978	0.001100110011	0.002200220022
FBgn0020545	0.00860091743119	0.00401376146789	0.00846023688663	0.00630733944954	0.00286697247706
FBgn0033397	0.00770077007701	0.002200220022	0.0294825511432	0.001100110011	0.002200220022
FBgn0033391	0.0682242990654	0.0317757009346	0.00846023688663	0.0429906542056	0.0308411214953
FBgn0033392	0.00860091743119	0.00401376146789	0.00846023688663	0.00630733944954	0.00286697247706
FBgn0038197	0.0682242990654	0.0317757009346	0.0910609857978	0.0429906542056	0.0308411214953
FBgn0035428	0.00770077007701	0.002200220022	0.0294825511432	0.001100110011	0.002200220022
FBgn0035429	0.00770077007701	0.002200220022	0.0910609857978	0.001100110011	0.002200220022
FBgn0024510	0.00860091743119	0.00401376146789	0.00846023688663	0.00630733944954	0.00286697247706
FBgn0035425	0.00860091743119	0.00401376146789	0.00846023688663	0.00630733944954	0.00286697247706
FBgn0035423	0.00860091743119	0.00401376146789	0.00846023688663	0.00630733944954	0.00286697247706
FBgn0033138	0.00770077007701	0.002200220022	0.0294825511432	0.001100110011	0.002200220022
FBgn0033130	0.00770077007701	0.002200220022	0.0294825511432	0.001100110011	0.002200220022
FBgn0033132	0.00770077007701	0.002200220022	0.0910609857978	0.001100110011	0.002200220022
FBgn0033134	0.00770077007701	0.002200220022	0.0910609857978	0.001100110011	0.002200220022
FBgn0033135	0.00770077007701	0.002200220022	0.0294825511432	0.001100110011	0.002200220022
FBgn0040507	0.0682242990654	0.0317757009346	0.0294825511432	0.0429906542056	0.0308411214953
FBgn0039897	0.00770077007701	0.002200220022	0.0910609857978	0.001100110011	0.002200220022
FBgn0035397	0.00860091743119	0.00401376146789	0.00846023688663	0.00630733944954	0.00286697247706
FBgn0005778	0.00770077007701	0.002200220022	0.0294825511432	0.001100110011	0.002200220022
FBgn0005771	0.00860091743119	0.00401376146789	0.00846023688663	0.00630733944954	0.00286697247706
FBgn0015756	0.00860091743119	0.00401376146789	0.00846023688663	0.00630733944954	0.00286697247706
FBgn0040102	0.0682242990654	0.0317757009346	0.0910609857978	0.0429906542056	0.0308411214953
FBgn0034230	0.00860091743119	0.00401376146789	0.00846023688663	0.00630733944954	0.00286697247706
FBgn0034231	0.00860091743119	0.00401376146789	0.00846023688663	0.00630733944954	0.00286697247706
FBgn0032899	0.00770077007701	0.002200220022	0.0910609857978	0.001100110011	0.002200220022
FBgn0032897	0.0682242990654	0.0317757009346	0.0910609857978	0.0429906542056	0.0308411214953
FBgn0051871	0.00770077007701	0.002200220022	0.0910609857978	0.001100110011	0.002200220022
FBgn0025394	0.00860091743119	0.00401376146789	0.00846023688663	0.00630733944954	0.00286697247706
FBgn0025643	0.00770077007701	0.002200220022	0.0910609857978	0.001100110011	0.002200220022
FBgn0011648	0.00860091743119	0.00401376146789	0.00846023688663	0.00630733944954	0.00286697247706
FBgn0029768	0.00770077007701	0.002200220022	0.0294825511432	0.001100110011	0.002200220022
FBgn0029769	0.00770077007701	0.002200220022	0.0294825511432	0.001100110011	0.002200220022
FBgn0032518	0.00860091743119	0.00401376146789	0.00846023688663	0.00630733944954	0.00286697247706
FBgn0029761	0.00770077007701	0.002200220022	0.0294825511432	0.001100110011	0.002200220022
FBgn0029765	0.00770077007701	0.002200220022	0.0294825511432	0.001100110011	0.002200220022
FBgn0039359	0.0682242990654	0.0317757009346	0.00846023688663	0.0429906542056	0.0308411214953
FBgn0037934	0.00770077007701	0.002200220022	0.0294825511432	0.001100110011	0.002200220022
FBgn0037930	0.00860091743119	0.00401376146789	0.00846023688663	0.00630733944954	0.00286697247706
FBgn0037933	0.00860091743119	0.00401376146789	0.00846023688663	0.00630733944954	0.00286697247706
FBgn0037938	0.00770077007701	0.002200220022	0.0294825511432	0.001100110011	0.002200220022
FBgn0037939	0.00770077007701	0.002200220022	0.0294825511432	0.001100110011	0.002200220022
FBgn0000533	0.0682242990654	0.0317757009346	0.0910609857978	0.0429906542056	0.0308411214953
FBgn0000826	0.00770077007701	0.002200220022	0.0294825511432	0.001100110011	0.002200220022
FBgn0039647	0.00770077007701	0.002200220022	0.0294825511432	0.001100110011	0.002200220022
FBgn0039640	0.0682242990654	0.0317757009346	0.0910609857978	0.0429906542056	0.0308411214953
FBgn0031091	0.0682242990654	0.0317757009346	0.0910609857978	0.0429906542056	0.0308411214953
FBgn0031090	0.00860091743119	0.00401376146789	0.00846023688663	0.00630733944954	0.00286697247706
FBgn0031093	0.00860091743119	0.00401376146789	0.0910609857978	0.00630733944954	0.00286697247706
FBgn0031092	0.00860091743119	0.00401376146789	0.0910609857978	0.00630733944954	0.00286697247706
FBgn0031094	0.0682242990654	0.0317757009346	0.0910609857978	0.0429906542056	0.0308411214953
FBgn0031097	0.0682242990654	0.0317757009346	0.0910609857978	0.0429906542056	0.0308411214953
FBgn0031099	0.00860091743119	0.00401376146789	0.00846023688663	0.00630733944954	0.00286697247706
FBgn0031098	0.00860091743119	0.00401376146789	0.00846023688663	0.00630733944954	0.00286697247706
FBgn0011361	0.00860091743119	0.00401376146789	0.00846023688663	0.00630733944954	0.00286697247706
FBgn0029947	0.00770077007701	0.002200220022	0.0294825511432	0.001100110011	0.002200220022
FBgn0029944	0.00860091743119	0.00401376146789	0.00846023688663	0.00630733944954	0.00286697247706
FBgn0031896	0.0682242990654	0.0317757009346	0.0910609857978	0.0429906542056	0.0308411214953
FBgn0015584	0.00770077007701	0.002200220022	0.0294825511432	0.001100110011	0.002200220022
FBgn0027095	0.00860091743119	0.00401376146789	0.00846023688663	0.00630733944954	0.00286697247706
FBgn0034602	0.00770077007701	0.002200220022	0.0910609857978	0.001100110011	0.002200220022
FBgn0034601	0.00770077007701	0.002200220022	0.0294825511432	0.001100110011	0.002200220022
FBgn0034606	0.0682242990654	0.0317757009346	0.0910609857978	0.0429906542056	0.0308411214953
FBgn0015288	0.00860091743119	0.00401376146789	0.00846023688663	0.00630733944954	0.00286697247706
FBgn0040089	0.0682242990654	0.0317757009346	0.0910609857978	0.0429906542056	0.0308411214953
FBgn0015286	0.0682242990654	0.0317757009346	0.0910609857978	0.0429906542056	0.0308411214953
FBgn0015287	0.00860091743119	0.00401376146789	0.0910609857978	0.00630733944954	0.00286697247706
FBgn0034356	0.0682242990654	0.0317757009346	0.0294825511432	0.0429906542056	0.0308411214953
FBgn0015282	0.00860091743119	0.00401376146789	0.00846023688663	0.00630733944954	0.00286697247706
FBgn0040080	0.00860091743119	0.00401376146789	0.00846023688663	0.00630733944954	0.00286697247706
FBgn0034352	0.00770077007701	0.002200220022	0.0294825511432	0.001100110011	0.002200220022
FBgn0038113	0.00770077007701	0.002200220022	0.0294825511432	0.001100110011	0.002200220022
FBgn0038110	0.00860091743119	0.00401376146789	0.00846023688663	0.00630733944954	0.00286697247706
FBgn0038114	0.00770077007701	0.002200220022	0.0294825511432	0.001100110011	0.002200220022
FBgn0038118	0.0682242990654	0.0317757009346	0.0910609857978	0.0429906542056	0.0308411214953
FBgn0030276	0.00860091743119	0.00401376146789	0.00846023688663	0.00630733944954	0.00286697247706
FBgn0030277	0.00770077007701	0.002200220022	0.0294825511432	0.001100110011	0.002200220022
FBgn0030274	0.00860091743119	0.00401376146789	0.00846023688663	0.00630733944954	0.00286697247706
FBgn0030275	0.0682242990654	0.0317757009346	0.0910609857978	0.0429906542056	0.0308411214953
FBgn0037550	0.00860091743119	0.00401376146789	0.00846023688663	0.00630733944954	0.00286697247706
FBgn0037551	0.00860091743119	0.00401376146789	0.00846023688663	0.00630733944954	0.00286697247706
FBgn0050359	0.00770077007701	0.002200220022	0.0294825511432	0.001100110011	0.002200220022
FBgn0036606	0.00770077007701	0.002200220022	0.0294825511432	0.001100110011	0.002200220022
FBgn0036600	0.00770077007701	0.002200220022	0.0294825511432	0.001100110011	0.002200220022
FBgn0036603	0.00770077007701	0.002200220022	0.0294825511432	0.001100110011	0.002200220022
FBgn0040260	0.00770077007701	0.002200220022	0.0294825511432	0.001100110011	0.002200220022
FBgn0010014	0.0682242990654	0.0317757009346	0.0910609857978	0.0429906542056	0.0308411214953
FBgn0010015	0.00770077007701	0.002200220022	0.0294825511432	0.001100110011	0.002200220022
FBgn0010019	0.00770077007701	0.002200220022	0.0294825511432	0.001100110011	0.002200220022
FBgn0010548	0.0682242990654	0.0317757009346	0.0910609857978	0.0429906542056	0.0308411214953
FBgn0023179	0.00770077007701	0.002200220022	0.0294825511432	0.001100110011	0.002200220022
FBgn0026418	0.00860091743119	0.00401376146789	0.00846023688663	0.00630733944954	0.00286697247706
FBgn0023175	0.00860091743119	0.00401376146789	0.00846023688663	0.00630733944954	0.00286697247706
FBgn0023174	0.00860091743119	0.00401376146789	0.00846023688663	0.00630733944954	0.00286697247706
FBgn0026417	0.00860091743119	0.00401376146789	0.00846023688663	0.00630733944954	0.00286697247706
FBgn0023170	0.00860091743119	0.00401376146789	0.00846023688663	0.00630733944954	0.00286697247706
FBgn0051221	0.00770077007701	0.002200220022	0.0294825511432	0.001100110011	0.002200220022
FBgn0021825	0.00860091743119	0.00401376146789	0.00846023688663	0.00630733944954	0.00286697247706
FBgn0037181	0.00770077007701	0.002200220022	0.0294825511432	0.001100110011	0.002200220022
FBgn0037180	0.00770077007701	0.002200220022	0.0294825511432	0.001100110011	0.002200220022
FBgn0051431	0.0682242990654	0.0317757009346	0.0910609857978	0.0429906542056	0.0308411214953
FBgn0030852	0.0682242990654	0.0317757009346	0.0910609857978	0.0429906542056	0.0308411214953
FBgn0030850	0.0682242990654	0.0317757009346	0.00846023688663	0.0429906542056	0.0308411214953
FBgn0030851	0.00860091743119	0.00401376146789	0.00846023688663	0.00630733944954	0.00286697247706
FBgn0030859	0.00770077007701	0.002200220022	0.0294825511432	0.001100110011	0.002200220022
FBgn0032726	0.00770077007701	0.002200220022	0.0294825511432	0.001100110011	0.002200220022
FBgn0032727	0.0682242990654	0.0317757009346	0.0910609857978	0.0429906542056	0.0308411214953
FBgn0023545	0.00860091743119	0.00401376146789	0.00846023688663	0.00630733944954	0.00286697247706
FBgn0001205	0.00860091743119	0.00401376146789	0.00846023688663	0.00630733944954	0.00286697247706
FBgn0001204	0.0682242990654	0.0317757009346	0.0294825511432	0.0429906542056	0.0308411214953
FBgn0001203	0.00770077007701	0.002200220022	0.0294825511432	0.001100110011	0.002200220022
FBgn0001202	0.00860091743119	0.00401376146789	0.00846023688663	0.00630733944954	0.00286697247706
FBgn0053156	0.0682242990654	0.0317757009346	0.00846023688663	0.0429906542056	0.0308411214953
FBgn0052412	0.00770077007701	0.002200220022	0.0294825511432	0.001100110011	0.002200220022
FBgn0001208	0.00770077007701	0.002200220022	0.0910609857978	0.001100110011	0.002200220022
FBgn0042138	0.00860091743119	0.00401376146789	0.00846023688663	0.00630733944954	0.00286697247706
FBgn0035989	0.00860091743119	0.00401376146789	0.00846023688663	0.00630733944954	0.00286697247706
FBgn0035983	0.00860091743119	0.00401376146789	0.00846023688663	0.00630733944954	0.00286697247706
FBgn0024250	0.0682242990654	0.0317757009346	0.0910609857978	0.0429906542056	0.0308411214953
FBgn0024252	0.00860091743119	0.00401376146789	0.00846023688663	0.00630733944954	0.00286697247706
FBgn0020018	0.0682242990654	0.0317757009346	0.0910609857978	0.0429906542056	0.0308411214953
FBgn0028374	0.00770077007701	0.002200220022	0.0294825511432	0.001100110011	0.002200220022
FBgn0028373	0.00860091743119	0.00401376146789	0.00846023688663	0.00630733944954	0.00286697247706
FBgn0028371	0.0682242990654	0.0317757009346	0.0910609857978	0.0429906542056	0.0308411214953
FBgn0028379	0.00770077007701	0.002200220022	0.0294825511432	0.001100110011	0.002200220022
FBgn0029531	0.00770077007701	0.002200220022	0.0910609857978	0.001100110011	0.002200220022
FBgn0022702	0.0682242990654	0.0317757009346	0.0910609857978	0.0429906542056	0.0308411214953
FBgn0032549	0.00770077007701	0.002200220022	0.0294825511432	0.001100110011	0.002200220022
FBgn0022709	0.00770077007701	0.002200220022	0.0294825511432	0.001100110011	0.002200220022
FBgn0029539	0.00770077007701	0.002200220022	0.0294825511432	0.001100110011	0.002200220022
FBgn0035187	0.0682242990654	0.0317757009346	0.0294825511432	0.0429906542056	0.0308411214953
FBgn0035186	0.0682242990654	0.0317757009346	0.0910609857978	0.0429906542056	0.0308411214953
FBgn0032231	0.00860091743119	0.00401376146789	0.00846023688663	0.00630733944954	0.00286697247706
FBgn0035189	0.0682242990654	0.0317757009346	0.0910609857978	0.0429906542056	0.0308411214953
FBgn0052687	0.00770077007701	0.002200220022	0.0294825511432	0.001100110011	0.002200220022
FBgn0036102	0.00770077007701	0.002200220022	0.0294825511432	0.001100110011	0.002200220022
FBgn0031250	0.00860091743119	0.00401376146789	0.00846023688663	0.00630733944954	0.00286697247706
FBgn0033423	0.00770077007701	0.002200220022	0.0294825511432	0.001100110011	0.002200220022
FBgn0033427	0.00860091743119	0.00401376146789	0.00846023688663	0.00630733944954	0.00286697247706
FBgn0036988	0.00860091743119	0.00401376146789	0.00846023688663	0.00630733944954	0.00286697247706
FBgn0036104	0.00860091743119	0.00401376146789	0.00846023688663	0.00630733944954	0.00286697247706
FBgn0052350	0.0682242990654	0.0317757009346	0.00846023688663	0.0429906542056	0.0308411214953
FBgn0036980	0.00860091743119	0.00401376146789	0.00846023688663	0.00630733944954	0.00286697247706
FBgn0036986	0.0682242990654	0.0317757009346	0.0910609857978	0.0429906542056	0.0308411214953
FBgn0036987	0.00860091743119	0.00401376146789	0.00846023688663	0.00630733944954	0.00286697247706
FBgn0036984	0.00770077007701	0.002200220022	0.0910609857978	0.001100110011	0.002200220022
FBgn0028952	0.00860091743119	0.00401376146789	0.0910609857978	0.00630733944954	0.00286697247706
FBgn0028953	0.00860091743119	0.00401376146789	0.00846023688663	0.00630733944954	0.00286697247706
FBgn0019940	0.00770077007701	0.002200220022	0.0294825511432	0.001100110011	0.002200220022
FBgn0019949	0.00860091743119	0.00401376146789	0.00846023688663	0.00630733944954	0.00286697247706
FBgn0019948	0.00860091743119	0.00401376146789	0.00846023688663	0.00630733944954	0.00286697247706
FBgn0030073	0.0682242990654	0.0317757009346	0.0910609857978	0.0429906542056	0.0308411214953
FBgn0000492	0.0682242990654	0.0317757009346	0.0910609857978	0.0429906542056	0.0308411214953
FBgn0034162	0.0682242990654	0.0317757009346	0.0910609857978	0.0429906542056	0.0308411214953
FBgn0031406	0.00770077007701	0.002200220022	0.0294825511432	0.001100110011	0.002200220022
FBgn0031407	0.00770077007701	0.002200220022	0.0294825511432	0.001100110011	0.002200220022
FBgn0039189	0.00860091743119	0.00401376146789	0.0910609857978	0.00630733944954	0.00286697247706
FBgn0031405	0.00770077007701	0.002200220022	0.0294825511432	0.001100110011	0.002200220022
FBgn0031070	0.00860091743119	0.00401376146789	0.0910609857978	0.00630733944954	0.00286697247706
FBgn0037128	0.00770077007701	0.002200220022	0.0294825511432	0.001100110011	0.002200220022
FBgn0037126	0.00770077007701	0.002200220022	0.0294825511432	0.001100110011	0.002200220022
FBgn0037124	0.00770077007701	0.002200220022	0.0294825511432	0.001100110011	0.002200220022
FBgn0037123	0.00770077007701	0.002200220022	0.0294825511432	0.001100110011	0.002200220022
FBgn0037122	0.0682242990654	0.0317757009346	0.0294825511432	0.0429906542056	0.0308411214953
FBgn0037121	0.00860091743119	0.00401376146789	0.00846023688663	0.00630733944954	0.00286697247706
FBgn0025820	0.00860091743119	0.00401376146789	0.00846023688663	0.00630733944954	0.00286697247706
FBgn0025825	0.00860091743119	0.00401376146789	0.00846023688663	0.00630733944954	0.00286697247706
FBgn0025827	0.00770077007701	0.002200220022	0.0294825511432	0.001100110011	0.002200220022
FBgn0039459	0.00860091743119	0.00401376146789	0.00846023688663	0.00630733944954	0.00286697247706
FBgn0039451	0.00860091743119	0.00401376146789	0.00846023688663	0.00630733944954	0.00286697247706
FBgn0033802	0.0682242990654	0.0317757009346	0.0294825511432	0.0429906542056	0.0308411214953
FBgn0034299	0.00860091743119	0.00401376146789	0.0910609857978	0.00630733944954	0.00286697247706
FBgn0034294	0.00770077007701	0.002200220022	0.0294825511432	0.001100110011	0.002200220022
FBgn0034295	0.00770077007701	0.002200220022	0.0294825511432	0.001100110011	0.002200220022
FBgn0031664	0.00860091743119	0.00401376146789	0.00846023688663	0.00630733944954	0.00286697247706
FBgn0031662	0.00860091743119	0.00401376146789	0.00846023688663	0.00630733944954	0.00286697247706
FBgn0031663	0.0682242990654	0.0317757009346	0.0910609857978	0.0429906542056	0.0308411214953
FBgn0014010	0.00860091743119	0.00401376146789	0.00846023688663	0.00630733944954	0.00286697247706
FBgn0014011	0.0682242990654	0.0317757009346	0.0910609857978	0.0429906542056	0.0308411214953
FBgn0004242	0.00770077007701	0.002200220022	0.0294825511432	0.001100110011	0.002200220022
FBgn0050115	0.0682242990654	0.0317757009346	0.0910609857978	0.0429906542056	0.0308411214953
FBgn0036299	0.00860091743119	0.00401376146789	0.00846023688663	0.00630733944954	0.00286697247706
FBgn0036294	0.0682242990654	0.0317757009346	0.0910609857978	0.0429906542056	0.0308411214953
FBgn0036292	0.00860091743119	0.00401376146789	0.00846023688663	0.00630733944954	0.00286697247706
FBgn0034838	0.00770077007701	0.002200220022	0.0294825511432	0.001100110011	0.002200220022
FBgn0002773	0.00770077007701	0.002200220022	0.0910609857978	0.001100110011	0.002200220022
FBgn0034833	0.00770077007701	0.002200220022	0.0294825511432	0.001100110011	0.002200220022
FBgn0040696	0.00770077007701	0.002200220022	0.0294825511432	0.001100110011	0.002200220022
FBgn0030474	0.00860091743119	0.00401376146789	0.00846023688663	0.00630733944954	0.00286697247706
FBgn0038321	0.0682242990654	0.0317757009346	0.0910609857978	0.0429906542056	0.0308411214953
FBgn0038323	0.00860091743119	0.00401376146789	0.00846023688663	0.00630733944954	0.00286697247706
FBgn0038324	0.00860091743119	0.00401376146789	0.00846023688663	0.00630733944954	0.00286697247706
FBgn0038325	0.00860091743119	0.00401376146789	0.00846023688663	0.00630733944954	0.00286697247706
FBgn0038327	0.00860091743119	0.00401376146789	0.00846023688663	0.00630733944954	0.00286697247706
FBgn0035400	0.00860091743119	0.00401376146789	0.00846023688663	0.00630733944954	0.00286697247706
FBgn0035401	0.00860091743119	0.00401376146789	0.00846023688663	0.00630733944954	0.00286697247706
FBgn0002775	0.00860091743119	0.00401376146789	0.00846023688663	0.00630733944954	0.00286697247706
FBgn0035409	0.00770077007701	0.002200220022	0.0294825511432	0.001100110011	0.002200220022
FBgn0036476	0.00860091743119	0.00401376146789	0.00846023688663	0.00630733944954	0.00286697247706
FBgn0033117	0.00860091743119	0.00401376146789	0.00846023688663	0.00630733944954	0.00286697247706
FBgn0033115	0.00770077007701	0.002200220022	0.0910609857978	0.001100110011	0.002200220022
FBgn0036478	0.00860091743119	0.00401376146789	0.00846023688663	0.00630733944954	0.00286697247706
FBgn0013548	0.00860091743119	0.00401376146789	0.00846023688663	0.00630733944954	0.00286697247706
FBgn0002778	0.0682242990654	0.0317757009346	0.0910609857978	0.0429906542056	0.0308411214953
FBgn0040524	0.0682242990654	0.0317757009346	0.0910609857978	0.0429906542056	0.0308411214953
FBgn0005590	0.00770077007701	0.002200220022	0.0294825511432	0.001100110011	0.002200220022
FBgn0004009	0.0682242990654	0.0317757009346	0.0910609857978	0.0429906542056	0.0308411214953
FBgn0001075	0.0682242990654	0.0317757009346	0.0294825511432	0.0429906542056	0.0308411214953
FBgn0004556	0.0682242990654	0.0317757009346	0.0910609857978	0.0429906542056	0.0308411214953
FBgn0030964	0.0682242990654	0.0317757009346	0.0910609857978	0.0429906542056	0.0308411214953
FBgn0002522	0.0682242990654	0.0317757009346	0.0910609857978	0.0429906542056	0.0308411214953
FBgn0002521	0.0682242990654	0.0317757009346	0.0910609857978	0.0429906542056	0.0308411214953
FBgn0002526	0.00860091743119	0.00401376146789	0.00846023688663	0.00630733944954	0.00286697247706
FBgn0002525	0.00860091743119	0.00401376146789	0.00846023688663	0.00630733944954	0.00286697247706
FBgn0002524	0.00860091743119	0.00401376146789	0.00846023688663	0.00630733944954	0.00286697247706
FBgn0013764	0.00860091743119	0.00401376146789	0.00846023688663	0.00630733944954	0.00286697247706
FBgn0025628	0.00860091743119	0.00401376146789	0.00846023688663	0.00630733944954	0.00286697247706
FBgn0025627	0.0682242990654	0.0317757009346	0.0910609857978	0.0429906542056	0.0308411214953
FBgn0025626	0.00860091743119	0.00401376146789	0.00846023688663	0.00630733944954	0.00286697247706
FBgn0025625	0.0682242990654	0.0317757009346	0.0910609857978	0.0429906542056	0.0308411214953
FBgn0025621	0.00860091743119	0.00401376146789	0.00846023688663	0.00630733944954	0.00286697247706
FBgn0025620	0.00770077007701	0.002200220022	0.0294825511432	0.001100110011	0.002200220022
FBgn0051321	0.0682242990654	0.0317757009346	0.0910609857978	0.0429906542056	0.0308411214953
FBgn0039210	0.00860091743119	0.00401376146789	0.00846023688663	0.00630733944954	0.00286697247706
FBgn0029704	0.0682242990654	0.0317757009346	0.0910609857978	0.0429906542056	0.0308411214953
FBgn0029705	0.00770077007701	0.002200220022	0.0294825511432	0.001100110011	0.002200220022
FBgn0029702	0.00770077007701	0.002200220022	0.0294825511432	0.001100110011	0.002200220022
FBgn0029703	0.00770077007701	0.002200220022	0.0294825511432	0.001100110011	0.002200220022
FBgn0030960	0.0682242990654	0.0317757009346	0.0294825511432	0.0429906542056	0.0308411214953
FBgn0034599	0.00860091743119	0.00401376146789	0.00846023688663	0.00630733944954	0.00286697247706
FBgn0008649	0.0682242990654	0.0317757009346	0.0910609857978	0.0429906542056	0.0308411214953
FBgn0037918	0.00860091743119	0.00401376146789	0.00846023688663	0.00630733944954	0.00286697247706
FBgn0037917	0.0682242990654	0.0317757009346	0.00846023688663	0.0429906542056	0.0308411214953
FBgn0030040	0.0682242990654	0.0317757009346	0.0910609857978	0.0429906542056	0.0308411214953
FBgn0027654	0.00770077007701	0.002200220022	0.0910609857978	0.001100110011	0.002200220022
FBgn0039666	0.0682242990654	0.0317757009346	0.0910609857978	0.0429906542056	0.0308411214953
FBgn0003345	0.00860091743119	0.00401376146789	0.0910609857978	0.00630733944954	0.00286697247706
FBgn0003346	0.00770077007701	0.002200220022	0.0294825511432	0.001100110011	0.002200220022
FBgn0039665	0.0682242990654	0.0317757009346	0.00846023688663	0.0429906542056	0.0308411214953
FBgn0039663	0.00860091743119	0.00401376146789	0.00846023688663	0.00630733944954	0.00286697247706
FBgn0024939	0.00860091743119	0.00401376146789	0.00846023688663	0.00630733944954	0.00286697247706
FBgn0026255	0.00770077007701	0.002200220022	0.0294825511432	0.001100110011	0.002200220022
FBgn0020224	0.00860091743119	0.00401376146789	0.00846023688663	0.00630733944954	0.00286697247706
FBgn0030257	0.00770077007701	0.002200220022	0.0294825511432	0.001100110011	0.002200220022
FBgn0031872	0.00860091743119	0.00401376146789	0.00846023688663	0.00630733944954	0.00286697247706
FBgn0031871	0.00860091743119	0.00401376146789	0.00846023688663	0.00630733944954	0.00286697247706
FBgn0031876	0.00860091743119	0.00401376146789	0.00846023688663	0.00630733944954	0.00286697247706
FBgn0031878	0.00860091743119	0.00401376146789	0.00846023688663	0.00630733944954	0.00286697247706
FBgn0010409	0.00860091743119	0.00401376146789	0.00846023688663	0.00630733944954	0.00286697247706
FBgn0028918	0.00770077007701	0.002200220022	0.0294825511432	0.001100110011	0.002200220022
FBgn0028919	0.00860091743119	0.00401376146789	0.00846023688663	0.00630733944954	0.00286697247706
FBgn0040060	0.00770077007701	0.002200220022	0.0294825511432	0.001100110011	0.002200220022
FBgn0040064	0.0682242990654	0.0317757009346	0.0910609857978	0.0429906542056	0.0308411214953
FBgn0034629	0.00770077007701	0.002200220022	0.0294825511432	0.001100110011	0.002200220022
FBgn0038134	0.00770077007701	0.002200220022	0.0294825511432	0.001100110011	0.002200220022
FBgn0038130	0.00770077007701	0.002200220022	0.0294825511432	0.001100110011	0.002200220022
FBgn0038132	0.00770077007701	0.002200220022	0.0294825511432	0.001100110011	0.002200220022
FBgn0030968	0.0682242990654	0.0317757009346	0.0294825511432	0.0429906542056	0.0308411214953
FBgn0028913	0.00770077007701	0.002200220022	0.0294825511432	0.001100110011	0.002200220022
FBgn0030969	0.00860091743119	0.00401376146789	0.00846023688663	0.00630733944954	0.00286697247706
FBgn0051632	0.0682242990654	0.0317757009346	0.0910609857978	0.0429906542056	0.0308411214953
FBgn0015001	0.00770077007701	0.002200220022	0.0294825511432	0.001100110011	0.002200220022
FBgn0051635	0.00860091743119	0.00401376146789	0.00846023688663	0.00630733944954	0.00286697247706
FBgn0051634	0.00770077007701	0.002200220022	0.0294825511432	0.001100110011	0.002200220022
FBgn0035014	0.00770077007701	0.002200220022	0.0294825511432	0.001100110011	0.002200220022
FBgn0035016	0.00860091743119	0.00401376146789	0.00846023688663	0.00630733944954	0.00286697247706
FBgn0021847	0.00860091743119	0.00401376146789	0.00846023688663	0.00630733944954	0.00286697247706
FBgn0051457	0.00860091743119	0.00401376146789	0.00846023688663	0.00630733944954	0.00286697247706
FBgn0051453	0.00860091743119	0.00401376146789	0.00846023688663	0.00630733944954	0.00286697247706
FBgn0035469	0.00860091743119	0.00401376146789	0.00846023688663	0.00630733944954	0.00286697247706
FBgn0051989	0.00860091743119	0.00401376146789	0.00846023688663	0.00630733944954	0.00286697247706
FBgn0051988	0.00770077007701	0.002200220022	0.0294825511432	0.001100110011	0.002200220022
FBgn0000119	0.00860091743119	0.00401376146789	0.00846023688663	0.00630733944954	0.00286697247706
FBgn0030837	0.00770077007701	0.002200220022	0.0294825511432	0.001100110011	0.002200220022
FBgn0030830	0.00770077007701	0.002200220022	0.0294825511432	0.001100110011	0.002200220022
FBgn0030833	0.00860091743119	0.00401376146789	0.00846023688663	0.00630733944954	0.00286697247706
FBgn0030838	0.00860091743119	0.00401376146789	0.00846023688663	0.00630733944954	0.00286697247706
FBgn0000117	0.00860091743119	0.00401376146789	0.00846023688663	0.00630733944954	0.00286697247706
FBgn0036665	0.00770077007701	0.002200220022	0.0294825511432	0.001100110011	0.002200220022
FBgn0036662	0.00860091743119	0.00401376146789	0.00846023688663	0.00630733944954	0.00286697247706
FBgn0036661	0.00860091743119	0.00401376146789	0.00846023688663	0.00630733944954	0.00286697247706
FBgn0032744	0.00860091743119	0.00401376146789	0.00846023688663	0.00630733944954	0.00286697247706
FBgn0032741	0.00770077007701	0.002200220022	0.0294825511432	0.001100110011	0.002200220022
FBgn0032966	0.00770077007701	0.002200220022	0.0294825511432	0.001100110011	0.002200220022
FBgn0032967	0.00770077007701	0.002200220022	0.0294825511432	0.001100110011	0.002200220022
FBgn0001197	0.00860091743119	0.00401376146789	0.00846023688663	0.00630733944954	0.00286697247706
FBgn0033461	0.00770077007701	0.002200220022	0.0294825511432	0.001100110011	0.002200220022
FBgn0051326	0.00770077007701	0.002200220022	0.0294825511432	0.001100110011	0.002200220022
FBgn0030299	0.0682242990654	0.0317757009346	0.00846023688663	0.0429906542056	0.0308411214953
FBgn0005563	0.00770077007701	0.002200220022	0.0294825511432	0.001100110011	0.002200220022
FBgn0005564	0.0682242990654	0.0317757009346	0.0910609857978	0.0429906542056	0.0308411214953
FBgn0003975	0.0682242990654	0.0317757009346	0.0910609857978	0.0429906542056	0.0308411214953
FBgn0003970	0.0682242990654	0.0317757009346	0.0910609857978	0.0429906542056	0.0308411214953
FBgn0013953	0.0682242990654	0.0317757009346	0.0910609857978	0.0429906542056	0.0308411214953
FBgn0004619	0.00770077007701	0.002200220022	0.0294825511432	0.001100110011	0.002200220022
FBgn0004618	0.00770077007701	0.002200220022	0.0294825511432	0.001100110011	0.002200220022
FBgn0001222	0.00860091743119	0.00401376146789	0.00846023688663	0.00630733944954	0.00286697247706
FBgn0001225	0.00770077007701	0.002200220022	0.0294825511432	0.001100110011	0.002200220022
FBgn0001226	0.0682242990654	0.0317757009346	0.0910609857978	0.0429906542056	0.0308411214953
FBgn0005694	0.00860091743119	0.00401376146789	0.00846023688663	0.00630733944954	0.00286697247706
FBgn0005695	0.00860091743119	0.00401376146789	0.00846023688663	0.00630733944954	0.00286697247706
FBgn0033566	0.00860091743119	0.00401376146789	0.00846023688663	0.00630733944954	0.00286697247706
FBgn0024150	0.00770077007701	0.002200220022	0.0294825511432	0.001100110011	0.002200220022
FBgn0035211	0.00860091743119	0.00401376146789	0.00846023688663	0.00630733944954	0.00286697247706
FBgn0024230	0.00860091743119	0.00401376146789	0.00846023688663	0.00630733944954	0.00286697247706
FBgn0000455	0.00860091743119	0.00401376146789	0.00846023688663	0.00630733944954	0.00286697247706
FBgn0033466	0.0682242990654	0.0317757009346	0.0910609857978	0.0429906542056	0.0308411214953
FBgn0030252	0.00770077007701	0.002200220022	0.0294825511432	0.001100110011	0.002200220022
FBgn0038484	0.00770077007701	0.002200220022	0.0294825511432	0.001100110011	0.002200220022
FBgn0038486	0.00770077007701	0.002200220022	0.0294825511432	0.001100110011	0.002200220022
FBgn0038481	0.00770077007701	0.002200220022	0.0294825511432	0.001100110011	0.002200220022
FBgn0038951	0.00860091743119	0.00401376146789	0.00846023688663	0.00630733944954	0.00286697247706
FBgn0038488	0.00860091743119	0.00401376146789	0.00846023688663	0.00630733944954	0.00286697247706
FBgn0000459	0.0682242990654	0.0317757009346	0.0910609857978	0.0429906542056	0.0308411214953
FBgn0042118	0.00770077007701	0.002200220022	0.0294825511432	0.001100110011	0.002200220022
FBgn0036732	0.0682242990654	0.0317757009346	0.0910609857978	0.0429906542056	0.0308411214953
FBgn0003598	0.00860091743119	0.00401376146789	0.00846023688663	0.00630733944954	0.00286697247706
FBgn0031431	0.00770077007701	0.002200220022	0.0294825511432	0.001100110011	0.002200220022
FBgn0019929	0.00770077007701	0.002200220022	0.0294825511432	0.001100110011	0.002200220022
FBgn0036738	0.00770077007701	0.002200220022	0.0294825511432	0.001100110011	0.002200220022
FBgn0052405	0.00770077007701	0.002200220022	0.0294825511432	0.001100110011	0.002200220022
FBgn0052406	0.00770077007701	0.002200220022	0.0910609857978	0.001100110011	0.002200220022
FBgn0036992	0.00770077007701	0.002200220022	0.0294825511432	0.001100110011	0.002200220022
FBgn0029512	0.00860091743119	0.00401376146789	0.00846023688663	0.00630733944954	0.00286697247706
FBgn0029514	0.00860091743119	0.00401376146789	0.00846023688663	0.00630733944954	0.00286697247706
FBgn0000477	0.0682242990654	0.0317757009346	0.0294825511432	0.0429906542056	0.0308411214953
FBgn0000479	0.00770077007701	0.002200220022	0.0910609857978	0.001100110011	0.002200220022
FBgn0004838	0.00860091743119	0.00401376146789	0.00846023688663	0.00630733944954	0.00286697247706
FBgn0036046	0.00770077007701	0.002200220022	0.0294825511432	0.001100110011	0.002200220022
FBgn0031465	0.00770077007701	0.002200220022	0.0294825511432	0.001100110011	0.002200220022
FBgn0031467	0.00770077007701	0.002200220022	0.0294825511432	0.001100110011	0.002200220022
FBgn0031461	0.0682242990654	0.0317757009346	0.0910609857978	0.0429906542056	0.0308411214953
FBgn0037101	0.00770077007701	0.002200220022	0.0294825511432	0.001100110011	0.002200220022
FBgn0030332	0.00770077007701	0.002200220022	0.0294825511432	0.001100110011	0.002200220022
FBgn0030485	0.00860091743119	0.00401376146789	0.00846023688663	0.00630733944954	0.00286697247706
FBgn0030481	0.00860091743119	0.00401376146789	0.00846023688663	0.00630733944954	0.00286697247706
FBgn0004784	0.00770077007701	0.002200220022	0.0294825511432	0.001100110011	0.002200220022
FBgn0000617	0.00860091743119	0.00401376146789	0.00846023688663	0.00630733944954	0.00286697247706
FBgn0000615	0.00860091743119	0.00401376146789	0.00846023688663	0.00630733944954	0.00286697247706
FBgn0036040	0.00770077007701	0.002200220022	0.0294825511432	0.001100110011	0.002200220022
FBgn0031682	0.00860091743119	0.00401376146789	0.00846023688663	0.00630733944954	0.00286697247706
FBgn0031683	0.0682242990654	0.0317757009346	0.0910609857978	0.0429906542056	0.0308411214953
FBgn0015924	0.00860091743119	0.00401376146789	0.00846023688663	0.00630733944954	0.00286697247706
FBgn0031689	0.00770077007701	0.002200220022	0.0294825511432	0.001100110011	0.002200220022
FBgn0015929	0.00860091743119	0.00401376146789	0.0910609857978	0.00630733944954	0.00286697247706
FBgn0000639	0.00770077007701	0.002200220022	0.0294825511432	0.001100110011	0.002200220022
FBgn0014032	0.00770077007701	0.002200220022	0.0294825511432	0.001100110011	0.002200220022
FBgn0030317	0.0682242990654	0.0317757009346	0.0294825511432	0.0429906542056	0.0308411214953
FBgn0030158	0.00770077007701	0.002200220022	0.0294825511432	0.001100110011	0.002200220022
FBgn0030311	0.00860091743119	0.00401376146789	0.00846023688663	0.00630733944954	0.00286697247706
FBgn0037473	0.0682242990654	0.0317757009346	0.0910609857978	0.0429906542056	0.0308411214953
FBgn0034304	0.00860091743119	0.00401376146789	0.00846023688663	0.00630733944954	0.00286697247706
FBgn0033350	0.00860091743119	0.00401376146789	0.00846023688663	0.00630733944954	0.00286697247706
FBgn0015230	0.00770077007701	0.002200220022	0.0294825511432	0.001100110011	0.002200220022
FBgn0011592	0.00860091743119	0.00401376146789	0.00846023688663	0.00630733944954	0.00286697247706
FBgn0034816	0.0682242990654	0.0317757009346	0.0910609857978	0.0429906542056	0.0308411214953
FBgn0010198	0.00860091743119	0.00401376146789	0.00846023688663	0.00630733944954	0.00286697247706
FBgn0038302	0.0682242990654	0.0317757009346	0.0910609857978	0.0429906542056	0.0308411214953
FBgn0038303	0.00860091743119	0.00401376146789	0.00846023688663	0.00630733944954	0.00286697247706
FBgn0031437	0.00860091743119	0.00401376146789	0.00846023688663	0.00630733944954	0.00286697247706
FBgn0033680	0.00770077007701	0.002200220022	0.0294825511432	0.001100110011	0.002200220022
FBgn0033686	0.0682242990654	0.0317757009346	0.0910609857978	0.0429906542056	0.0308411214953
FBgn0033174	0.0682242990654	0.0317757009346	0.0910609857978	0.0429906542056	0.0308411214953
FBgn0036416	0.00770077007701	0.002200220022	0.0294825511432	0.001100110011	0.002200220022
FBgn0033170	0.0682242990654	0.0317757009346	0.0294825511432	0.0429906542056	0.0308411214953
FBgn0013563	0.00860091743119	0.00401376146789	0.00846023688663	0.00630733944954	0.00286697247706
FBgn0033178	0.00860091743119	0.00401376146789	0.00846023688663	0.00630733944954	0.00286697247706
FBgn0051849	0.00860091743119	0.00401376146789	0.00846023688663	0.00630733944954	0.00286697247706
FBgn0032889	0.0682242990654	0.0317757009346	0.0910609857978	0.0429906542056	0.0308411214953
FBgn0032886	0.0682242990654	0.0317757009346	0.0910609857978	0.0429906542056	0.0308411214953
FBgn0032884	0.00860091743119	0.00401376146789	0.00846023688663	0.00630733944954	0.00286697247706
FBgn0032883	0.00860091743119	0.00401376146789	0.00846023688663	0.00630733944954	0.00286697247706
FBgn0032882	0.0682242990654	0.0317757009346	0.0910609857978	0.0429906542056	0.0308411214953
FBgn0004574	0.00860091743119	0.00401376146789	0.00846023688663	0.00630733944954	0.00286697247706
FBgn0004573	0.00770077007701	0.002200220022	0.0294825511432	0.001100110011	0.002200220022
FBgn0025833	0.00770077007701	0.002200220022	0.0294825511432	0.001100110011	0.002200220022
FBgn0013749	0.00860091743119	0.00401376146789	0.00846023688663	0.00630733944954	0.00286697247706
FBgn0030792	0.00860091743119	0.00401376146789	0.00846023688663	0.00630733944954	0.00286697247706
FBgn0003053	0.0682242990654	0.0317757009346	0.0910609857978	0.0429906542056	0.0308411214953
FBgn0032087	0.00770077007701	0.002200220022	0.0910609857978	0.001100110011	0.002200220022
FBgn0032082	0.00770077007701	0.002200220022	0.0294825511432	0.001100110011	0.002200220022
FBgn0032089	0.00770077007701	0.002200220022	0.0294825511432	0.001100110011	0.002200220022
FBgn0032088	0.00770077007701	0.002200220022	0.0910609857978	0.001100110011	0.002200220022
FBgn0025352	0.0682242990654	0.0317757009346	0.00846023688663	0.0429906542056	0.0308411214953
FBgn0028582	0.00860091743119	0.00401376146789	0.00846023688663	0.00630733944954	0.00286697247706
FBgn0052109	0.0682242990654	0.0317757009346	0.0910609857978	0.0429906542056	0.0308411214953
FBgn0039232	0.00770077007701	0.002200220022	0.0294825511432	0.001100110011	0.002200220022
FBgn0039235	0.00770077007701	0.002200220022	0.0294825511432	0.001100110011	0.002200220022
FBgn0039234	0.00860091743119	0.00401376146789	0.00846023688663	0.00630733944954	0.00286697247706
FBgn0039237	0.00770077007701	0.002200220022	0.0294825511432	0.001100110011	0.002200220022
FBgn0029723	0.00770077007701	0.002200220022	0.0294825511432	0.001100110011	0.002200220022
FBgn0026372	0.00860091743119	0.00401376146789	0.00846023688663	0.00630733944954	0.00286697247706
FBgn0035685	0.00770077007701	0.002200220022	0.0910609857978	0.001100110011	0.002200220022
FBgn0033076	0.00770077007701	0.002200220022	0.0294825511432	0.001100110011	0.002200220022
FBgn0015300	0.00770077007701	0.002200220022	0.0294825511432	0.001100110011	0.002200220022
FBgn0044817	0.00770077007701	0.002200220022	0.0294825511432	0.001100110011	0.002200220022
FBgn0038470	0.00860091743119	0.00401376146789	0.0910609857978	0.00630733944954	0.00286697247706
FBgn0016047	0.00770077007701	0.002200220022	0.0294825511432	0.001100110011	0.002200220022
FBgn0003366	0.00770077007701	0.002200220022	0.0294825511432	0.001100110011	0.002200220022
FBgn0003360	0.0682242990654	0.0317757009346	0.0910609857978	0.0429906542056	0.0308411214953
FBgn0015582	0.00860091743119	0.00401376146789	0.00846023688663	0.00630733944954	0.00286697247706
FBgn0040968	0.00770077007701	0.002200220022	0.0294825511432	0.001100110011	0.002200220022
FBgn0035028	0.0682242990654	0.0317757009346	0.0910609857978	0.0429906542056	0.0308411214953
FBgn0038545	0.00860091743119	0.00401376146789	0.00846023688663	0.00630733944954	0.00286697247706
FBgn0027534	0.00860091743119	0.00401376146789	0.00846023688663	0.00630733944954	0.00286697247706
FBgn0029989	0.00770077007701	0.002200220022	0.0294825511432	0.001100110011	0.002200220022
FBgn0029980	0.00860091743119	0.00401376146789	0.00846023688663	0.00630733944954	0.00286697247706
FBgn0029987	0.00770077007701	0.002200220022	0.0294825511432	0.001100110011	0.002200220022
FBgn0031855	0.00770077007701	0.002200220022	0.0294825511432	0.001100110011	0.002200220022
FBgn0031850	0.0682242990654	0.0317757009346	0.0910609857978	0.0429906542056	0.0308411214953
FBgn0031859	0.00770077007701	0.002200220022	0.0294825511432	0.001100110011	0.002200220022
FBgn0031858	0.00770077007701	0.002200220022	0.0294825511432	0.001100110011	0.002200220022
FBgn0052452	0.00860091743119	0.00401376146789	0.00846023688663	0.00630733944954	0.00286697247706
FBgn0034318	0.00770077007701	0.002200220022	0.0294825511432	0.001100110011	0.002200220022
FBgn0031148	0.0682242990654	0.0317757009346	0.0910609857978	0.0429906542056	0.0308411214953
FBgn0034647	0.0682242990654	0.0317757009346	0.0910609857978	0.0429906542056	0.0308411214953
FBgn0034313	0.00860091743119	0.00401376146789	0.00846023688663	0.00630733944954	0.00286697247706
FBgn0034312	0.0682242990654	0.0317757009346	0.00846023688663	0.0429906542056	0.0308411214953
FBgn0034643	0.00860091743119	0.00401376146789	0.00846023688663	0.00630733944954	0.00286697247706
FBgn0015247	0.00860091743119	0.00401376146789	0.00846023688663	0.00630733944954	0.00286697247706
FBgn0038150	0.0682242990654	0.0317757009346	0.0910609857978	0.0429906542056	0.0308411214953
FBgn0034068	0.00860091743119	0.00401376146789	0.00846023688663	0.00630733944954	0.00286697247706
FBgn0026188	0.0682242990654	0.0317757009346	0.00846023688663	0.0429906542056	0.0308411214953
FBgn0040950	0.00770077007701	0.002200220022	0.0294825511432	0.001100110011	0.002200220022
FBgn0040227	0.00860091743119	0.00401376146789	0.00846023688663	0.00630733944954	0.00286697247706
FBgn0015025	0.00860091743119	0.00401376146789	0.0910609857978	0.00630733944954	0.00286697247706
FBgn0040954	0.00860091743119	0.00401376146789	0.00846023688663	0.00630733944954	0.00286697247706
FBgn0010053	0.0682242990654	0.0317757009346	0.0294825511432	0.0429906542056	0.0308411214953
FBgn0026323	0.00860091743119	0.00401376146789	0.00846023688663	0.00630733944954	0.00286697247706
FBgn0023130	0.00860091743119	0.00401376146789	0.00846023688663	0.00630733944954	0.00286697247706
FBgn0051619	0.00770077007701	0.002200220022	0.0910609857978	0.001100110011	0.002200220022
FBgn0000286	0.00860091743119	0.00401376146789	0.00846023688663	0.00630733944954	0.00286697247706
FBgn0000287	0.00770077007701	0.002200220022	0.0294825511432	0.001100110011	0.002200220022
FBgn0027584	0.00770077007701	0.002200220022	0.0294825511432	0.001100110011	0.002200220022
FBgn0027585	0.00770077007701	0.002200220022	0.0910609857978	0.001100110011	0.002200220022
FBgn0027586	0.00770077007701	0.002200220022	0.0294825511432	0.001100110011	0.002200220022
FBgn0027587	0.00860091743119	0.00401376146789	0.00846023688663	0.00630733944954	0.00286697247706
FBgn0051472	0.0682242990654	0.0317757009346	0.0910609857978	0.0429906542056	0.0308411214953
FBgn0030814	0.00770077007701	0.002200220022	0.0294825511432	0.001100110011	0.002200220022
FBgn0030813	0.00860091743119	0.00401376146789	0.00846023688663	0.00630733944954	0.00286697247706
FBgn0000137	0.0682242990654	0.0317757009346	0.0910609857978	0.0429906542056	0.0308411214953
FBgn0036643	0.00860091743119	0.00401376146789	0.00846023688663	0.00630733944954	0.00286697247706
FBgn0036648	0.0682242990654	0.0317757009346	0.0910609857978	0.0429906542056	0.0308411214953
FBgn0032946	0.00770077007701	0.002200220022	0.0910609857978	0.001100110011	0.002200220022
FBgn0032945	0.00770077007701	0.002200220022	0.0910609857978	0.001100110011	0.002200220022
FBgn0004903	0.00860091743119	0.00401376146789	0.00846023688663	0.00630733944954	0.00286697247706
FBgn0032769	0.00770077007701	0.002200220022	0.0294825511432	0.001100110011	0.002200220022
FBgn0033322	0.00770077007701	0.002200220022	0.0294825511432	0.001100110011	0.002200220022
FBgn0020440	0.00860091743119	0.00401376146789	0.00846023688663	0.00630733944954	0.00286697247706
FBgn0053110	0.00770077007701	0.002200220022	0.0294825511432	0.001100110011	0.002200220022
FBgn0053113	0.00860091743119	0.00401376146789	0.00846023688663	0.00630733944954	0.00286697247706
FBgn0032340	0.00860091743119	0.00401376146789	0.00846023688663	0.00630733944954	0.00286697247706
FBgn0011828	0.00770077007701	0.002200220022	0.0294825511432	0.001100110011	0.002200220022
FBgn0032341	0.00860091743119	0.00401376146789	0.00846023688663	0.00630733944954	0.00286697247706
FBgn0032614	0.00770077007701	0.002200220022	0.0910609857978	0.001100110011	0.002200220022
FBgn0033549	0.00860091743119	0.00401376146789	0.00846023688663	0.00630733944954	0.00286697247706
FBgn0033540	0.00860091743119	0.00401376146789	0.00846023688663	0.00630733944954	0.00286697247706
FBgn0033543	0.0682242990654	0.0317757009346	0.0910609857978	0.0429906542056	0.0308411214953
FBgn0039867	0.00860091743119	0.00401376146789	0.00846023688663	0.00630733944954	0.00286697247706
FBgn0035234	0.00770077007701	0.002200220022	0.0294825511432	0.001100110011	0.002200220022
FBgn0035236	0.00860091743119	0.00401376146789	0.00846023688663	0.00630733944954	0.00286697247706
FBgn0035231	0.0682242990654	0.0317757009346	0.0294825511432	0.0429906542056	0.0308411214953
FBgn0033374	0.0682242990654	0.0317757009346	0.0294825511432	0.0429906542056	0.0308411214953
FBgn0035233	0.00860091743119	0.00401376146789	0.00846023688663	0.00630733944954	0.00286697247706
FBgn0035232	0.00860091743119	0.00401376146789	0.00846023688663	0.00630733944954	0.00286697247706
FBgn0033375	0.00860091743119	0.00401376146789	0.00846023688663	0.00630733944954	0.00286697247706
FBgn0035238	0.00860091743119	0.00401376146789	0.00846023688663	0.00630733944954	0.00286697247706
FBgn0032310	0.00770077007701	0.002200220022	0.0294825511432	0.001100110011	0.002200220022
FBgn0037307	0.00770077007701	0.002200220022	0.0294825511432	0.001100110011	0.002200220022
FBgn0038979	0.00770077007701	0.002200220022	0.0294825511432	0.001100110011	0.002200220022
FBgn0038973	0.0682242990654	0.0317757009346	0.0294825511432	0.0429906542056	0.0308411214953
FBgn0038972	0.00770077007701	0.002200220022	0.0910609857978	0.001100110011	0.002200220022
FBgn0052647	0.00770077007701	0.002200220022	0.0294825511432	0.001100110011	0.002200220022
FBgn0028572	0.0682242990654	0.0317757009346	0.0910609857978	0.0429906542056	0.0308411214953
FBgn0028573	0.00770077007701	0.002200220022	0.0294825511432	0.001100110011	0.002200220022
FBgn0031908	0.00770077007701	0.002200220022	0.0910609857978	0.001100110011	0.002200220022
FBgn0031907	0.00770077007701	0.002200220022	0.0294825511432	0.001100110011	0.002200220022
FBgn0031906	0.00770077007701	0.002200220022	0.0294825511432	0.001100110011	0.002200220022
FBgn0042177	0.0682242990654	0.0317757009346	0.0910609857978	0.0429906542056	0.0308411214953
FBgn0031904	0.00860091743119	0.00401376146789	0.00846023688663	0.00630733944954	0.00286697247706
FBgn0052396	0.00770077007701	0.002200220022	0.0294825511432	0.001100110011	0.002200220022
FBgn0052393	0.00860091743119	0.00401376146789	0.00846023688663	0.00630733944954	0.00286697247706
FBgn0052392	0.00770077007701	0.002200220022	0.0294825511432	0.001100110011	0.002200220022
FBgn0037891	0.0682242990654	0.0317757009346	0.00846023688663	0.0429906542056	0.0308411214953
FBgn0037897	0.00860091743119	0.00401376146789	0.00846023688663	0.00630733944954	0.00286697247706
FBgn0037895	0.00770077007701	0.002200220022	0.0294825511432	0.001100110011	0.002200220022
FBgn0037894	0.0682242990654	0.0317757009346	0.0910609857978	0.0429906542056	0.0308411214953
FBgn0004171	0.00770077007701	0.002200220022	0.0294825511432	0.001100110011	0.002200220022
FBgn0032688	0.00860091743119	0.00401376146789	0.00846023688663	0.00630733944954	0.00286697247706
FBgn0000451	0.00770077007701	0.002200220022	0.0910609857978	0.001100110011	0.002200220022
FBgn0039140	0.00860091743119	0.00401376146789	0.00846023688663	0.00630733944954	0.00286697247706
[truncated: 3,712 more rows]
