# Supplementary material for: Predicting Spatial and Temporal Gene Expression Using an Integrative Model of Transcription Factor Occupancy and Chromatin State
Source: PLoS Comput Biol. 2012 Dec 6;8(12):e1002798. doi: 10.1371/journal.pcbi.1002798 (PMC3516547; doi:10.1371/journal.pcbi.1002798)
Supplement: Dataset S6 — New annotations of gene activity based on BDGP release 3 (2010). In spatial (a) and temporal (b) classes. (XLS) [file pcbi.1002798.s006.xls]

## Sheet: Wilczynski_Dataset_S6a
gene	MESO	SM	VM	MESO_ONLY	SM_ONLY	VM_ONLY	MESO_SM	MESO_VM	VM_SM
FBgn0014931	0	0	0	0	0	0	0	0	0
FBgn0027563	0	0	0	0	0	0	0	0	0
FBgn0027560	0	0	0	0	0	0	0	0	0
FBgn0027561	0	0	0	0	0	0	0	0	0
FBgn0027565	0	0	0	0	0	0	0	0	0
FBgn0027569	0	0	0	0	0	0	0	0	0
FBgn0033579	0	0	0	0	0	0	0	0	0
FBgn0085215	0	0	0	0	0	0	0	0	0
FBgn0036115	0	0	0	0	0	0	0	0	0
FBgn0033434	0	0	0	0	0	0	0	0	0
FBgn0033437	0	0	0	0	0	0	0	0	0
FBgn0033431	0	0	0	0	0	0	0	0	0
FBgn0010431	0	0	0	0	0	0	0	0	0
FBgn0033439	0	0	0	0	0	0	0	0	0
FBgn0015550	0	0	0	0	0	0	0	0	0
FBgn0040751	0	0	0	0	0	0	0	0	0
FBgn0038243	1	0	0	1	0	0	0	0	0
FBgn0051721	0	0	0	0	0	0	0	0	0
FBgn0036379	0	0	1	0	0	1	0	0	0
FBgn0033574	0	0	0	0	0	0	0	0	0
FBgn0036373	0	0	0	0	0	0	0	0	0
FBgn0036377	0	1	0	0	1	0	0	0	0
FBgn0051908	0	0	0	0	0	0	0	0	0
FBgn0005614	0	0	0	0	0	0	0	0	0
FBgn0005616	0	0	0	0	0	0	0	0	0
FBgn0005617	0	0	0	0	0	0	0	0	0
FBgn0005612	1	0	0	1	0	0	0	0	0
FBgn0025809	0	0	0	0	0	0	0	0	0
FBgn0035872	0	0	0	0	0	0	0	0	0
FBgn0028642	0	0	0	0	0	0	0	0	0
FBgn0028862	0	0	0	0	0	0	0	0	0
FBgn0028644	0	0	0	0	0	0	0	0	0
FBgn0028645	0	0	0	0	0	0	0	0	0
FBgn0028648	0	0	0	0	0	0	0	0	0
FBgn0025549	0	0	0	0	0	0	0	0	0
FBgn0032478	0	0	0	0	0	0	0	0	0
FBgn0032479	0	0	0	0	0	0	0	0	0
FBgn0032476	0	0	0	0	0	0	0	0	0
FBgn0032477	0	0	0	0	0	0	0	0	0
FBgn0039354	0	0	0	0	0	0	0	0	0
FBgn0032475	0	0	0	0	0	0	0	0	0
FBgn0039352	0	0	0	0	0	0	0	0	0
FBgn0032473	0	0	0	0	0	0	0	0	0
FBgn0039350	0	0	0	0	0	0	0	0	0
FBgn0003510	0	0	0	0	0	0	0	0	0
FBgn0003513	0	0	0	0	0	0	0	0	0
FBgn0003515	0	0	0	0	0	0	0	0	0
FBgn0003042	0	0	0	0	0	0	0	0	0
FBgn0003517	0	0	0	0	0	0	0	0	0
FBgn0035296	0	0	0	0	0	0	0	0	0
FBgn0035294	0	0	0	0	0	0	0	0	0
FBgn0035203	0	0	0	0	0	0	0	0	0
FBgn0052599	0	0	0	0	0	0	0	0	0
FBgn0035207	0	0	0	0	0	0	0	0	0
FBgn0039943	0	0	0	0	0	0	0	0	0
FBgn0039942	0	0	0	0	0	0	0	0	0
FBgn0039233	1	1	0	0	0	0	1	0	0
FBgn0035128	0	0	0	0	0	0	0	0	0
FBgn0038405	0	0	0	0	0	0	0	0	0
FBgn0035124	0	0	0	0	0	0	0	0	0
FBgn0038407	0	0	0	0	0	0	0	0	0
FBgn0038401	0	0	0	0	0	0	0	0	0
FBgn0039237	0	0	0	0	0	0	0	0	0
FBgn0004430	0	0	0	0	0	0	0	0	0
FBgn0031979	0	0	0	0	0	0	0	0	0
FBgn0031972	0	0	0	0	0	0	0	0	0
FBgn0034453	0	0	0	0	0	0	0	0	0
FBgn0031970	0	0	0	0	0	0	0	0	0
FBgn0031975	0	1	0	0	1	0	0	0	0
FBgn0034186	0	0	0	0	0	0	0	0	0
FBgn0038749	0	0	0	0	0	0	0	0	0
FBgn0034181	0	0	0	0	0	0	0	0	0
FBgn0034182	0	0	0	0	0	0	0	0	0
FBgn0038742	0	0	0	0	0	0	0	0	0
FBgn0038747	0	0	0	0	0	0	0	0	0
FBgn0038745	0	0	0	0	0	0	0	0	0
FBgn0036117	0	0	0	0	0	0	0	0	0
FBgn0030511	0	1	0	0	1	0	0	0	0
FBgn0063659	0	0	0	0	0	0	0	0	0
FBgn0036967	0	0	0	0	0	0	0	0	0
FBgn0019650	0	0	0	0	0	0	0	0	0
FBgn0036111	0	0	0	0	0	0	0	0	0
FBgn0031608	0	0	0	0	0	0	0	0	0
FBgn0034989	0	0	0	0	0	0	0	0	0
FBgn0010229	0	0	0	0	0	0	0	0	0
FBgn0031601	0	0	0	0	0	0	0	0	0
FBgn0010225	0	1	1	0	0	0	0	0	1
FBgn0040102	0	0	0	0	0	0	0	0	0
FBgn0031606	0	0	0	0	0	0	0	0	0
FBgn0010220	0	0	0	0	0	0	0	0	0
FBgn0051739	0	0	0	0	0	0	0	0	0
FBgn0051221	1	0	0	1	0	0	0	0	0
FBgn0026578	0	0	0	0	0	0	0	0	0
FBgn0051223	0	0	0	0	0	0	0	0	0
FBgn0037181	0	0	0	0	0	0	0	0	0
FBgn0037180	0	0	0	0	0	0	0	0	0
FBgn0037185	0	0	0	0	0	0	0	0	0
FBgn0026573	0	0	0	0	0	0	0	0	0
FBgn0026570	0	0	0	0	0	0	0	0	0
FBgn0000346	0	0	0	0	0	0	0	0	0
FBgn0039433	0	0	0	0	0	0	0	0	0
FBgn0039430	0	0	0	0	0	0	0	0	0
FBgn0039437	0	0	0	0	0	0	0	0	0
FBgn0039436	0	0	0	0	0	0	0	0	0
FBgn0039435	0	0	0	0	0	0	0	0	0
FBgn0039434	0	0	0	0	0	0	0	0	0
FBgn0032111	0	0	0	0	0	0	0	0	0
FBgn0032114	0	0	0	0	0	0	0	0	0
FBgn0032116	0	0	0	0	0	0	0	0	0
FBgn0037767	0	0	0	0	0	0	0	0	0
FBgn0037766	0	0	0	0	0	0	0	0	0
FBgn0037760	0	0	0	0	0	0	0	0	0
FBgn0037763	0	0	0	0	0	0	0	0	0
FBgn0032803	0	0	0	0	0	0	0	0	0
FBgn0032801	0	0	0	0	0	0	0	0	0
FBgn0032800	0	0	0	0	0	0	0	0	0
FBgn0050172	0	0	0	0	0	0	0	0	0
FBgn0020508	0	0	0	0	0	0	0	0	0
FBgn0020506	0	0	0	0	0	0	0	0	0
FBgn0020503	0	0	0	0	0	0	0	0	0
FBgn0024558	0	0	0	0	0	0	0	0	0
FBgn0032870	0	0	0	0	0	0	0	0	0
FBgn0035461	0	0	0	0	0	0	0	0	0
FBgn0035462	0	0	0	0	0	0	0	0	0
FBgn0020642	0	0	0	0	0	0	0	0	0
FBgn0032876	0	0	0	0	0	0	0	0	0
FBgn0030460	0	0	0	0	0	0	0	0	0
FBgn0033602	0	0	0	0	0	0	0	0	0
FBgn0033607	0	0	0	0	0	0	0	0	0
FBgn0033604	0	0	0	0	0	0	0	0	0
FBgn0028418	0	0	0	0	0	0	0	0	0
FBgn0024889	0	0	0	0	0	0	0	0	0
FBgn0024330	0	0	0	0	0	0	0	0	0
FBgn0003720	0	0	0	0	0	0	0	0	0
FBgn0030607	0	0	0	0	0	0	0	0	0
FBgn0030606	0	0	0	0	0	0	0	0	0
FBgn0052102	0	0	0	0	0	0	0	0	0
FBgn0052105	1	0	0	1	0	0	0	0	0
FBgn0025681	0	0	0	0	0	0	0	0	0
FBgn0025680	0	0	0	0	0	0	0	0	0
FBgn0025683	0	0	0	0	0	0	0	0	0
FBgn0025686	0	0	1	0	0	1	0	0	0
FBgn0043472	0	0	0	0	0	0	0	0	0
FBgn0043470	0	0	0	0	0	0	0	0	0
FBgn0040877	0	0	0	0	0	0	0	0	0
FBgn0003187	0	0	0	0	0	0	0	0	0
FBgn0037978	0	0	0	0	0	0	0	0	0
FBgn0037974	0	0	0	0	0	0	0	0	0
FBgn0037975	0	0	0	0	0	0	0	0	0
FBgn0037976	0	0	0	0	0	0	0	0	0
FBgn0037977	0	0	0	0	0	0	0	0	0
FBgn0000578	0	0	0	0	0	0	0	0	0
FBgn0000577	1	1	0	0	0	0	1	0	0
FBgn0037445	0	0	0	0	0	0	0	0	0
FBgn0031453	0	0	0	0	0	0	0	0	0
FBgn0039600	0	0	0	0	0	0	0	0	0
FBgn0039601	0	0	0	0	0	0	0	0	0
FBgn0038835	1	0	0	1	0	0	0	0	0
FBgn0030724	0	0	0	0	0	0	0	0	0
FBgn0030720	0	0	0	0	0	0	0	0	0
FBgn0030721	0	0	0	0	0	0	0	0	0
FBgn0030723	0	0	0	0	0	0	0	0	0
FBgn0029901	0	0	0	0	0	0	0	0	0
FBgn0029906	0	0	0	0	0	0	0	0	0
FBgn0029905	0	0	0	0	0	0	0	0	0
FBgn0029909	0	0	0	0	0	0	0	0	0
FBgn0051032	0	0	0	0	0	0	0	0	0
FBgn0051036	0	0	0	0	0	0	0	0	0
FBgn0051038	0	0	0	0	0	0	0	0	0
FBgn0050342	0	0	0	0	0	0	0	0	0
FBgn0050344	0	0	0	0	0	0	0	0	0
FBgn0027504	0	0	0	0	0	0	0	0	0
FBgn0027506	0	0	0	0	0	0	0	0	0
FBgn0027507	0	0	0	0	0	0	0	0	0
FBgn0027500	0	0	0	0	0	0	0	0	0
FBgn0027501	0	0	0	0	0	0	0	0	0
FBgn0027503	0	0	0	0	0	0	0	0	0
FBgn0019936	0	0	0	0	0	0	0	0	0
FBgn0052843	0	0	0	0	0	0	0	0	0
FBgn0037518	0	0	0	0	0	0	0	0	0
FBgn0030239	0	0	0	0	0	0	0	0	0
FBgn0037513	0	0	0	0	0	0	0	0	0
FBgn0037517	0	0	0	0	0	0	0	0	0
FBgn0030234	0	0	0	0	0	0	0	0	0
FBgn0030235	0	0	0	0	0	0	0	0	0
FBgn0085232	0	0	0	0	0	0	0	0	0
FBgn0024912	0	0	0	0	0	0	0	0	0
FBgn0085237	0	0	0	0	0	0	0	0	0
FBgn0033457	0	0	0	0	0	0	0	0	0
FBgn0036173	0	0	0	0	0	0	0	0	0
FBgn0033452	0	0	0	0	0	0	0	0	0
FBgn0033451	0	0	0	0	0	0	0	0	0
FBgn0036170	0	0	0	0	0	0	0	0	0
FBgn0038269	0	0	0	0	0	0	0	0	0
FBgn0040730	0	0	0	0	0	0	0	0	0
FBgn0051698	0	0	0	0	0	0	0	0	0
FBgn0040732	0	0	0	0	0	0	0	0	0
FBgn0038261	0	0	0	0	0	0	0	0	0
FBgn0051694	0	0	0	0	0	0	0	0	0
FBgn0051693	0	0	0	0	0	0	0	0	0
FBgn0038266	0	0	0	0	0	0	0	0	0
FBgn0035020	0	0	0	0	0	0	0	0	0
FBgn0005585	0	0	0	0	0	0	0	0	0
FBgn0036391	0	0	0	0	0	0	0	0	0
FBgn0036390	0	0	0	0	0	0	0	0	0
FBgn0036396	0	0	0	0	0	0	0	0	0
FBgn0036395	0	0	0	0	0	0	0	0	0
FBgn0036394	0	0	0	0	0	0	0	0	0
FBgn0036398	0	0	0	0	0	0	0	0	0
FBgn0030215	0	0	0	0	0	0	0	0	0
FBgn0035027	0	0	0	0	0	0	0	0	0
FBgn0051961	0	0	0	0	0	0	0	0	0
FBgn0022774	0	0	0	0	0	0	0	0	0
FBgn0023507	0	0	0	0	0	0	0	0	0
FBgn0023508	0	0	0	0	0	0	0	0	0
FBgn0023509	0	0	0	0	0	0	0	0	0
FBgn0035851	0	0	0	0	0	0	0	0	0
FBgn0035853	0	0	0	0	0	0	0	0	0
FBgn0035852	0	0	0	0	0	0	0	0	0
FBgn0035855	0	0	0	0	0	0	0	0	0
FBgn0035857	0	0	0	0	0	0	0	0	0
FBgn0035856	0	0	0	0	0	0	0	0	0
FBgn0035859	0	0	0	0	0	0	0	0	0
FBgn0028622	0	0	0	0	0	0	0	0	0
FBgn0032493	0	0	0	0	0	0	0	0	0
FBgn0032494	0	0	0	0	0	0	0	0	0
FBgn0032495	0	0	0	0	0	0	0	0	0
FBgn0053196	0	0	0	0	0	0	0	0	0
FBgn0053191	0	0	0	0	0	0	0	0	0
FBgn0053193	0	0	0	0	0	0	0	0	0
FBgn0005638	0	0	0	0	0	0	0	0	0
FBgn0005639	0	0	0	0	0	0	0	0	0
FBgn0052827	0	0	0	0	0	0	0	0	0
FBgn0005632	0	0	0	0	0	0	0	0	0
FBgn0005633	0	0	0	0	0	0	0	0	0
FBgn0005630	0	0	0	0	0	0	0	0	0
FBgn0031437	0	0	0	0	0	0	0	0	0
FBgn0003065	0	0	0	0	0	0	0	0	0
FBgn0003067	0	0	0	0	0	0	0	0	0
FBgn0028336	0	0	0	0	0	0	0	0	0
FBgn0029573	0	0	0	0	0	0	0	0	0
FBgn0022073	0	0	0	0	0	0	0	0	0
FBgn0028646	0	0	0	0	0	0	0	0	0
FBgn0020369	0	0	0	0	0	0	0	0	0
FBgn0035146	0	0	0	0	0	0	0	0	0
FBgn0035145	0	0	0	0	0	0	0	0	0
FBgn0035144	0	1	1	0	0	0	0	0	1
FBgn0035141	0	0	0	0	0	0	0	0	0
FBgn0038460	0	0	0	0	0	0	0	0	0
FBgn0020367	0	0	0	0	0	0	0	0	0
FBgn0035148	0	0	0	0	0	0	0	0	0
FBgn0031918	0	0	0	0	0	0	0	0	0
FBgn0034439	0	0	0	0	0	0	0	0	0
FBgn0031914	0	0	0	0	0	0	0	0	0
FBgn0034436	0	0	0	0	0	0	0	0	0
FBgn0031910	0	0	0	0	0	0	0	0	0
FBgn0031913	0	0	0	0	0	0	0	0	0
FBgn0036704	0	0	0	0	0	0	0	0	0
FBgn0038720	0	0	0	0	0	0	0	0	0
FBgn0038721	0	0	0	0	0	0	0	0	0
FBgn0038722	0	0	0	0	0	0	0	0	0
FBgn0038723	0	0	0	0	0	0	0	0	0
FBgn0030537	0	0	0	0	0	0	0	0	0
FBgn0030536	0	0	0	0	0	0	0	0	0
FBgn0030539	0	0	0	0	0	0	0	0	0
FBgn0036947	0	0	0	0	0	0	0	0	0
FBgn0037172	0	0	0	0	0	0	0	0	0
FBgn0036945	0	0	0	0	0	0	0	0	0
FBgn0036942	0	0	0	0	0	0	0	0	0
FBgn0036943	0	0	0	0	0	0	0	0	0
FBgn0036941	0	0	0	0	0	0	0	0	0
FBgn0063670	0	0	0	0	0	0	0	0	0
FBgn0031622	0	0	0	0	0	0	0	0	0
FBgn0031623	0	0	0	0	0	0	0	0	0
FBgn0031620	0	0	0	0	0	0	0	0	0
FBgn0031621	0	0	0	0	0	0	0	0	0
FBgn0015324	0	0	0	0	0	0	0	0	0
FBgn0039359	0	0	0	0	0	0	0	0	0
FBgn0038095	0	0	0	0	0	0	0	0	0
FBgn0002856	0	0	0	0	0	0	0	0	0
FBgn0038098	0	0	0	0	0	0	0	0	0
FBgn0038099	0	0	0	0	0	0	0	0	0
FBgn0039355	0	0	0	0	0	0	0	0	0
FBgn0032472	0	0	0	0	0	0	0	0	0
FBgn0034133	0	0	0	0	0	0	0	0	0
FBgn0031320	0	0	0	0	0	0	0	0	0
FBgn0034135	0	0	0	0	0	0	0	0	0
FBgn0031326	0	0	0	0	0	0	0	0	0
FBgn0040385	0	0	0	0	0	0	0	0	0
FBgn0040387	0	0	0	0	0	0	0	0	0
FBgn0034137	0	1	0	0	1	0	0	0	0
FBgn0040383	0	1	0	0	1	0	0	0	0
FBgn0051209	0	0	0	0	0	0	0	0	0
FBgn0051207	0	0	0	0	0	0	0	0	0
FBgn0051757	0	0	0	0	0	0	0	0	0
FBgn0040388	0	0	0	0	0	0	0	0	0
FBgn0051200	0	0	0	0	0	0	0	0	0
FBgn0037163	0	0	0	0	0	0	0	0	0
FBgn0026592	0	0	0	0	0	0	0	0	0
FBgn0026593	0	0	0	0	0	0	0	0	0
FBgn0037167	0	0	0	0	0	0	0	0	0
FBgn0037166	0	0	0	0	0	0	0	0	0
FBgn0037165	0	0	0	0	0	0	0	0	0
FBgn0037164	0	0	0	0	0	0	0	0	0
FBgn0030394	0	0	0	0	0	0	0	0	0
FBgn0037169	0	0	0	0	0	0	0	0	0
FBgn0025864	0	0	0	0	0	0	0	0	0
FBgn0000320	1	0	0	1	0	0	0	0	0
FBgn0016983	0	0	0	0	0	0	0	0	0
FBgn0016984	0	0	0	0	0	0	0	0	0
FBgn0033842	0	0	0	0	0	0	0	0	0
FBgn0039419	0	0	0	0	0	0	0	0	0
FBgn0039417	0	0	0	0	0	0	0	0	0
FBgn0037705	0	0	0	0	0	0	0	0	0
FBgn0030494	0	0	0	0	0	0	0	0	0
FBgn0037447	0	1	0	0	1	0	0	0	0
FBgn0031143	0	0	0	0	0	0	0	0	0
FBgn0034313	0	0	0	0	0	0	0	0	0
FBgn0004510	0	0	0	0	0	0	0	0	0
FBgn0004512	1	0	0	1	0	0	0	0	0
FBgn0004513	0	0	0	0	0	0	0	0	0
FBgn0004047	0	0	0	0	0	0	0	0	0
FBgn0004516	0	0	0	0	0	0	0	0	0
FBgn0004045	0	0	0	0	0	0	0	0	0
FBgn0034643	0	0	0	0	0	0	0	0	0
FBgn0015247	0	0	0	0	0	0	0	0	0
FBgn0050403	0	0	0	0	0	0	0	0	0
FBgn0050158	0	0	0	0	0	0	0	0	0
FBgn0050404	0	0	0	0	0	0	0	0	0
FBgn0050151	0	0	0	0	0	0	0	0	0
FBgn0003896	0	0	0	0	0	0	0	0	0
FBgn0035448	0	0	0	0	0	0	0	0	0
FBgn0035445	0	0	0	0	0	0	0	0	0
FBgn0020626	0	0	0	0	0	0	0	0	0
FBgn0020620	0	0	0	0	0	0	0	0	0
FBgn0020622	0	0	0	0	0	0	0	0	0
FBgn0020623	0	0	0	0	0	0	0	0	0
FBgn0033664	0	0	0	0	0	0	0	0	0
FBgn0033665	0	0	0	0	0	0	0	0	0
FBgn0033667	0	0	0	0	0	0	0	0	0
FBgn0033668	0	0	0	0	0	0	0	0	0
FBgn0033669	0	0	0	0	0	0	0	0	0
FBgn0003046	0	0	0	0	0	0	0	0	0
FBgn0032394	0	0	0	0	0	0	0	0	0
FBgn0032391	0	0	0	0	0	0	0	0	0
FBgn0032390	0	0	0	0	0	0	0	0	0
FBgn0035626	1	1	0	0	0	0	1	0	0
FBgn0035627	0	0	0	0	0	0	0	0	0
FBgn0035624	0	0	0	0	0	0	0	0	0
FBgn0035625	0	0	0	0	0	0	0	0	0
FBgn0035622	0	0	0	0	0	0	0	0	0
FBgn0035623	0	0	0	0	0	0	0	0	0
FBgn0035620	0	0	0	0	0	0	0	0	0
FBgn0035621	0	0	0	0	0	0	0	0	0
FBgn0013725	0	0	0	0	0	0	0	0	0
FBgn0052121	0	1	1	0	0	0	0	0	1
FBgn0028292	0	0	0	0	0	0	0	0	0
FBgn0039259	0	0	0	0	0	0	0	0	0
FBgn0032538	0	0	0	0	0	0	0	0	0
FBgn0001308	0	0	0	0	0	0	0	0	0
FBgn0039251	0	0	0	0	0	0	0	0	0
FBgn0039250	0	0	0	0	0	0	0	0	0
FBgn0039254	0	0	0	0	0	0	0	0	0
FBgn0029743	0	0	0	0	0	0	0	0	0
FBgn0029749	0	0	0	0	0	0	0	0	0
FBgn0037954	0	0	0	0	0	0	0	0	0
FBgn0037955	0	0	0	0	0	0	0	0	0
FBgn0037958	0	0	0	0	0	0	0	0	0
FBgn0003308	1	0	0	1	0	0	0	0	0
FBgn0039629	0	0	0	0	0	0	0	0	0
FBgn0003300	1	0	0	1	0	0	0	0	0
FBgn0003302	0	0	0	0	0	0	0	0	0
FBgn0039626	0	0	0	0	0	0	0	0	0
FBgn0039625	0	0	0	0	0	0	0	0	0
FBgn0016641	0	0	0	0	0	0	0	0	0
FBgn0034498	0	0	0	0	0	0	0	0	0
FBgn0029969	0	0	0	0	0	0	0	0	0
FBgn0027526	0	0	0	0	0	0	0	0	0
FBgn0027527	0	0	0	0	0	0	0	0	0
FBgn0027524	0	0	0	0	0	0	0	0	0
FBgn0027525	0	0	0	0	0	0	0	0	0
FBgn0027522	0	0	0	0	0	0	0	0	0
FBgn0085308	0	0	0	0	0	0	0	0	0
FBgn0027521	0	0	0	0	0	0	0	0	0
FBgn0034379	0	0	0	0	0	0	0	0	0
FBgn0034378	0	0	0	0	0	0	0	0	0
FBgn0034372	0	0	0	0	0	0	0	0	0
FBgn0034371	0	0	0	0	0	0	0	0	0
FBgn0034374	0	0	0	0	0	0	0	0	0
FBgn0030258	0	0	0	0	0	0	0	0	0
FBgn0030259	0	0	0	0	0	0	0	0	0
FBgn0030706	0	0	0	0	0	0	0	0	0
FBgn0037575	0	0	0	0	0	0	0	0	0
FBgn0030704	0	0	0	0	0	0	0	0	0
FBgn0030257	0	0	0	0	0	0	0	0	0
FBgn0037571	0	0	0	0	0	0	0	0	0
FBgn0037572	0	0	0	0	0	0	0	0	0
FBgn0030701	0	0	0	0	0	0	0	0	0
FBgn0036622	0	0	0	0	0	0	0	0	0
FBgn0036152	0	0	0	0	0	0	0	0	0
FBgn0033475	0	0	0	0	0	0	0	0	0
FBgn0033474	0	0	0	0	0	0	0	0	0
FBgn0033477	0	0	0	0	0	0	0	0	0
FBgn0033476	0	0	0	0	0	0	0	0	0
FBgn0036159	0	0	0	0	0	0	0	0	0
FBgn0085259	0	0	0	0	0	0	0	0	0
FBgn0015040	0	0	0	0	0	0	0	0	0
FBgn0038281	0	0	0	0	0	0	0	0	0
FBgn0026438	0	0	0	0	0	0	0	0	0
FBgn0026433	0	0	0	0	0	0	0	0	0
FBgn0026432	0	0	0	0	0	0	0	0	0
FBgn0038289	1	0	0	1	0	0	0	0	0
FBgn0026430	0	0	0	0	0	0	0	0	0
FBgn0004210	0	0	0	0	0	0	0	0	0
FBgn0050362	0	0	0	0	0	0	0	0	0
FBgn0021800	0	0	0	0	0	0	0	0	0
FBgn0051413	0	0	0	0	0	0	0	0	0
FBgn0051411	0	0	0	0	0	0	0	0	0
FBgn0037392	0	0	0	0	0	0	0	0	0
FBgn0030873	0	0	0	0	0	0	0	0	0
FBgn0030874	0	0	0	0	0	0	0	0	0
FBgn0037396	0	0	0	0	0	0	0	0	0
FBgn0030877	0	0	0	0	0	0	0	0	0
FBgn0050090	0	0	0	0	0	0	0	0	0
FBgn0032700	0	0	0	0	0	0	0	0	0
FBgn0023528	0	0	0	0	0	0	0	0	0
FBgn0032703	0	0	0	0	0	0	0	0	0
FBgn0032705	0	0	0	0	0	0	0	0	0
FBgn0023522	0	0	0	0	0	0	0	0	0
FBgn0023521	0	0	0	0	0	0	0	0	0
FBgn0023526	0	0	0	0	0	0	0	0	0
FBgn0023527	0	0	0	0	0	0	0	0	0
FBgn0023525	0	0	0	0	0	0	0	0	0
FBgn0035886	0	0	0	0	0	0	0	0	0
FBgn0035121	0	0	0	0	0	0	0	0	0
FBgn0039391	0	0	0	0	0	0	0	0	0
FBgn0032601	0	0	0	0	0	0	0	0	0
FBgn0001263	0	0	0	0	0	0	0	0	0
FBgn0039870	0	0	0	0	0	0	0	0	0
FBgn0052806	0	0	0	0	0	0	0	0	0
FBgn0024273	0	0	0	0	0	0	0	0	0
FBgn0033734	0	0	0	0	0	0	0	0	0
FBgn0033360	0	0	0	0	0	0	0	0	0
FBgn0029003	0	1	0	0	1	0	0	0	0
FBgn0029004	0	0	0	0	0	0	0	0	0
FBgn0035169	0	0	0	0	0	0	0	0	0
FBgn0035160	0	0	0	0	0	0	0	0	0
FBgn0038443	0	0	0	0	0	0	0	0	0
FBgn0035165	0	0	0	0	0	0	0	0	0
FBgn0038916	0	0	0	0	0	0	0	0	0
FBgn0035167	0	0	0	0	0	0	0	0	0
FBgn0038914	0	0	0	0	0	0	0	0	0
FBgn0020381	0	0	0	0	0	0	0	0	0
FBgn0020386	0	0	0	0	0	0	0	0	0
FBgn0020389	0	0	0	0	0	0	0	0	0
FBgn0033368	0	0	0	0	0	0	0	0	0
FBgn0034416	0	0	0	0	0	0	0	0	0
FBgn0031937	0	0	0	0	0	0	0	0	0
FBgn0034142	0	0	0	0	0	0	0	0	0
FBgn0031423	0	0	0	0	0	0	0	0	0
FBgn0034144	0	0	0	0	0	0	0	0	0
FBgn0031397	0	0	0	0	0	0	0	0	0
FBgn0031930	0	0	0	0	0	0	0	0	0
FBgn0034411	0	0	0	0	0	0	0	0	0
FBgn0031428	0	0	0	0	0	0	0	0	0
FBgn0031398	0	0	0	0	0	0	0	0	0
FBgn0031399	0	0	0	0	0	0	0	0	0
FBgn0034418	0	0	0	0	0	0	0	0	0
FBgn0031939	0	0	0	0	0	0	0	0	0
FBgn0038700	0	0	0	0	0	0	0	0	0
FBgn0038701	0	0	0	0	0	0	0	0	0
FBgn0038708	0	0	0	0	0	0	0	0	0
FBgn0038709	0	0	0	0	0	0	0	0	0
FBgn0052373	0	0	0	0	0	0	0	0	0
FBgn0052372	1	1	0	0	0	0	1	0	0
FBgn0034187	0	0	0	0	0	0	0	0	0
FBgn0010825	0	0	0	0	0	0	0	0	0
FBgn0024289	0	0	0	0	0	0	0	0	0
FBgn0031644	0	0	0	0	0	0	0	0	0
FBgn0010774	0	0	0	0	0	0	0	0	0
FBgn0031646	0	0	0	0	0	0	0	0	0
FBgn0047199	0	0	0	0	0	0	0	0	0
FBgn0051778	0	0	0	0	0	0	0	0	0
FBgn0000659	0	0	0	0	0	0	0	0	0
FBgn0000658	1	0	0	1	0	0	0	0	0
FBgn0037492	0	0	0	0	0	0	0	0	0
FBgn0037491	0	0	0	0	0	0	0	0	0
FBgn0025807	0	0	0	0	0	0	0	0	0
FBgn0025806	0	0	0	0	0	0	0	0	0
FBgn0000303	0	0	0	0	0	0	0	0	0
FBgn0025803	0	0	0	0	0	0	0	0	0
FBgn0011283	0	0	0	0	0	0	0	0	0
FBgn0011280	0	0	0	0	0	0	0	0	0
FBgn0033869	0	0	0	0	0	0	0	0	0
FBgn0011286	0	1	0	0	1	0	0	0	0
FBgn0033860	0	0	0	0	0	0	0	0	0
FBgn0011289	0	0	0	0	0	0	0	0	0
FBgn0033867	0	0	0	0	0	0	0	0	0
FBgn0033865	0	0	0	0	0	0	0	0	0
FBgn0039476	0	0	0	0	0	0	0	0	0
FBgn0039475	0	0	0	0	0	0	0	0	0
FBgn0039474	0	0	0	0	0	0	0	0	0
FBgn0039473	0	0	0	0	0	0	0	0	0
FBgn0039471	0	0	0	0	0	0	0	0	0
FBgn0039470	0	0	0	0	0	0	0	0	0
FBgn0039478	0	0	0	0	0	0	0	0	0
FBgn0037721	0	0	0	0	0	0	0	0	0
FBgn0037720	0	0	0	0	0	0	0	0	0
FBgn0037723	0	0	0	0	0	0	0	0	0
FBgn0037722	0	0	0	0	0	0	0	0	0
FBgn0037727	0	0	0	0	0	0	0	0	0
FBgn0030114	0	0	0	0	0	0	0	0	0
FBgn0010488	0	0	0	0	0	0	0	0	0
FBgn0004028	0	1	1	0	0	0	0	0	1
FBgn0050420	0	0	0	0	0	0	0	0	0
FBgn0020545	0	0	0	0	0	0	0	0	0
FBgn0033397	0	0	0	0	0	0	0	0	0
FBgn0033391	0	0	0	0	0	0	0	0	0
FBgn0033392	0	0	0	0	0	0	0	0	0
FBgn0024515	1	0	0	1	0	0	0	0	0
FBgn0035428	0	0	0	0	0	0	0	0	0
FBgn0035429	0	0	0	0	0	0	0	0	0
FBgn0024510	0	0	0	0	0	0	0	0	0
FBgn0035425	0	0	0	0	0	0	0	0	0
FBgn0035420	0	0	0	0	0	0	0	0	0
FBgn0035423	0	0	0	0	0	0	0	0	0
FBgn0033138	0	0	0	0	0	0	0	0	0
FBgn0036450	0	0	0	0	0	0	0	0	0
FBgn0033132	0	0	0	0	0	0	0	0	0
FBgn0033645	0	0	0	0	0	0	0	0	0
FBgn0033134	0	0	0	0	0	0	0	0	0
FBgn0033135	0	0	0	0	0	0	0	0	0
FBgn0036456	0	0	0	0	0	0	0	0	0
FBgn0010228	0	0	0	0	0	0	0	0	0
FBgn0040507	0	0	0	0	0	0	0	0	0
FBgn0039897	0	1	0	0	1	0	0	0	0
FBgn0035397	0	0	0	0	0	0	0	0	0
FBgn0005778	0	0	0	0	0	0	0	0	0
FBgn0035392	0	0	0	0	0	0	0	0	0
FBgn0034232	0	0	0	0	0	0	0	0	0
FBgn0005771	1	0	1	0	0	0	0	1	0
FBgn0035399	0	0	0	0	0	0	0	0	0
FBgn0034230	0	0	0	0	0	0	0	0	0
FBgn0034231	0	0	0	0	0	0	0	0	0
FBgn0032899	0	0	0	0	0	0	0	0	0
FBgn0051875	0	0	0	0	0	0	0	0	0
FBgn0025394	0	0	0	0	0	0	0	0	0
FBgn0025643	0	0	0	0	0	0	0	0	0
FBgn0027779	0	0	0	0	0	0	0	0	0
FBgn0029768	0	0	0	0	0	0	0	0	0
FBgn0029769	0	0	0	0	0	0	0	0	0
FBgn0032518	0	0	0	0	0	0	0	0	0
FBgn0029763	0	0	0	0	0	0	0	0	0
FBgn0039277	0	0	0	0	0	0	0	0	0
FBgn0029761	0	0	0	0	0	0	0	0	0
FBgn0039270	0	0	0	0	0	0	0	0	0
FBgn0039272	0	0	0	0	0	0	0	0	0
FBgn0037934	0	0	0	0	0	0	0	0	0
FBgn0037936	0	0	0	0	0	0	0	0	0
FBgn0037937	0	0	0	0	0	0	0	0	0
FBgn0037930	0	0	0	0	0	0	0	0	0
FBgn0037933	0	0	0	0	0	0	0	0	0
FBgn0037938	0	0	0	0	0	0	0	0	0
FBgn0037939	0	0	0	0	0	0	0	0	0
FBgn0000533	0	0	0	0	0	0	0	0	0
FBgn0000826	0	0	0	0	0	0	0	0	0
FBgn0039647	0	0	0	0	0	0	0	0	0
FBgn0039640	0	0	0	0	0	0	0	0	0
FBgn0031091	0	0	0	0	0	0	0	0	0
FBgn0031090	0	0	0	0	0	0	0	0	0
FBgn0031093	0	0	0	0	0	0	0	0	0
FBgn0031092	0	0	0	0	0	0	0	0	0
FBgn0031094	0	0	0	0	0	0	0	0	0
FBgn0031097	0	0	0	0	0	0	0	0	0
FBgn0031099	0	0	0	0	0	0	0	0	0
FBgn0031098	0	0	0	0	0	0	0	0	0
FBgn0011361	0	0	0	0	0	0	0	0	0
FBgn0029947	0	0	0	0	0	0	0	0	0
FBgn0029944	0	0	0	0	0	0	0	0	0
FBgn0029943	0	0	0	0	0	0	0	0	0
FBgn0029940	0	0	0	0	0	0	0	0	0
FBgn0029941	0	0	0	0	0	0	0	0	0
FBgn0040889	0	0	1	0	0	1	0	0	0
FBgn0027095	0	0	0	0	0	0	0	0	0
FBgn0027091	0	0	0	0	0	0	0	0	0
FBgn0034602	0	0	0	0	0	0	0	0	0
FBgn0034601	0	0	0	0	0	0	0	0	0
FBgn0034606	0	0	0	0	0	0	0	0	0
FBgn0015288	0	0	0	0	0	0	0	0	0
FBgn0040089	1	1	1	0	0	0	0	0	0
FBgn0015286	0	0	0	0	0	0	0	0	0
FBgn0015287	0	0	0	0	0	0	0	0	0
FBgn0034357	0	0	0	0	0	0	0	0	0
FBgn0034356	0	0	0	0	0	0	0	0	0
FBgn0015282	0	0	0	0	0	0	0	0	0
FBgn0015283	0	0	1	0	0	1	0	0	0
FBgn0034352	0	0	0	0	0	0	0	0	0
FBgn0038113	0	0	0	0	0	0	0	0	0
FBgn0038110	0	0	0	0	0	0	0	0	0
FBgn0038114	0	0	0	0	0	0	0	0	0
FBgn0038118	0	0	0	0	0	0	0	0	0
FBgn0030276	0	0	0	0	0	0	0	0	0
FBgn0030277	0	0	0	0	0	0	0	0	0
FBgn0030274	0	0	0	0	0	0	0	0	0
FBgn0030275	0	0	0	0	0	0	0	0	0
FBgn0030272	0	0	0	0	0	0	0	0	0
FBgn0037550	0	0	0	0	0	0	0	0	0
FBgn0037551	0	0	0	0	0	0	0	0	0
FBgn0047272	0	0	0	0	0	0	0	0	0
FBgn0037559	0	0	0	0	0	0	0	0	0
FBgn0036606	0	0	0	0	0	0	0	0	0
FBgn0036600	0	0	0	0	0	0	0	0	0
FBgn0040260	0	1	0	0	1	0	0	0	0
FBgn0010014	0	0	0	0	0	0	0	0	0
FBgn0010015	0	0	0	0	0	0	0	0	0
FBgn0010019	0	0	0	0	0	0	0	0	0
FBgn0010548	0	0	0	0	0	0	0	0	0
FBgn0023179	0	0	0	0	0	0	0	0	0
FBgn0023178	0	0	0	0	0	0	0	0	0
FBgn0023175	0	0	0	0	0	0	0	0	0
FBgn0026417	0	0	0	0	0	0	0	0	0
FBgn0023170	0	0	0	0	0	0	0	0	0
FBgn0021825	0	0	0	0	0	0	0	0	0
FBgn0026576	0	0	0	0	0	0	0	0	0
FBgn0026577	0	0	0	0	0	0	0	0	0
FBgn0051431	0	0	0	0	0	0	0	0	0
FBgn0030852	0	0	0	0	0	0	0	0	0
FBgn0030850	0	0	0	0	0	0	0	0	0
FBgn0037182	0	0	0	0	0	0	0	0	0
FBgn0030859	0	0	0	0	0	0	0	0	0
FBgn0085276	0	0	0	0	0	0	0	0	0
FBgn0026571	0	0	0	0	0	0	0	0	0
FBgn0085273	0	0	0	0	0	0	0	0	0
FBgn0032726	0	0	0	0	0	0	0	0	0
FBgn0032727	0	0	0	0	0	0	0	0	0
FBgn0032725	0	0	0	0	0	0	0	0	0
FBgn0061403	0	0	0	0	0	0	0	0	0
FBgn0023545	0	0	0	0	0	0	0	0	0
FBgn0001205	0	0	0	0	0	0	0	0	0
FBgn0001204	0	0	0	0	0	0	0	0	0
FBgn0001203	0	0	0	0	0	0	0	0	0
FBgn0001202	0	0	0	0	0	0	0	0	0
FBgn0053156	0	0	0	0	0	0	0	0	0
FBgn0053157	0	0	0	0	0	0	0	0	0
FBgn0001208	0	0	0	0	0	0	0	0	0
FBgn0042135	0	0	0	0	0	0	0	0	0
FBgn0042641	0	0	0	0	0	0	0	0	0
FBgn0042138	0	0	0	0	0	0	0	0	0
FBgn0035989	0	0	0	0	0	0	0	0	0
FBgn0035983	0	0	0	0	0	0	0	0	0
FBgn0024251	0	0	0	0	0	0	0	0	0
FBgn0035986	0	0	0	0	0	0	0	0	0
FBgn0035985	0	0	0	0	0	0	0	0	0
FBgn0024252	0	0	0	0	0	0	0	0	0
FBgn0020018	0	0	0	0	0	0	0	0	0
FBgn0028374	0	0	0	0	0	0	0	0	0
FBgn0028373	0	0	0	0	0	0	0	0	0
FBgn0028370	0	0	0	0	0	0	0	0	0
FBgn0028371	0	0	0	0	0	0	0	0	0
FBgn0028379	0	0	0	0	0	0	0	0	0
FBgn0022701	0	0	0	0	0	0	0	0	0
FBgn0029531	0	0	0	0	0	0	0	0	0
FBgn0022702	0	0	0	0	0	0	0	0	0
FBgn0039229	0	0	0	0	0	0	0	0	0
FBgn0022709	0	0	0	0	0	0	0	0	0
FBgn0029539	0	0	0	0	0	0	0	0	0
FBgn0035181	0	0	0	0	0	0	0	0	0
FBgn0035187	0	0	0	0	0	0	0	0	0
FBgn0038938	0	0	0	0	0	0	0	0	0
FBgn0039227	0	0	0	0	0	0	0	0	0
FBgn0035189	0	0	0	0	0	0	0	0	0
FBgn0038932	0	0	0	0	0	0	0	0	0
FBgn0052687	0	0	0	0	0	0	0	0	0
FBgn0019809	0	0	0	0	0	0	0	0	0
FBgn0031702	0	0	0	0	0	0	0	0	0
FBgn0036106	0	0	0	0	0	0	0	0	0
FBgn0036988	0	0	0	0	0	0	0	0	0
FBgn0036104	0	0	0	0	0	0	0	0	0
FBgn0052423	0	0	0	0	0	0	0	0	0
FBgn0052350	0	0	0	0	0	0	0	0	0
FBgn0036980	0	0	0	0	0	0	0	0	0
FBgn0052355	0	1	0	0	1	0	0	0	0
FBgn0036987	0	0	0	0	0	0	0	0	0
FBgn0036984	0	0	0	0	0	0	0	0	0
FBgn0028952	0	0	0	0	0	0	0	0	0
FBgn0028953	0	0	0	0	0	0	0	0	0
FBgn0028956	0	0	0	0	0	0	0	0	0
FBgn0019940	0	0	0	0	0	0	0	0	0
FBgn0019949	0	0	0	0	0	0	0	0	0
FBgn0019948	0	0	0	0	0	0	0	0	0
FBgn0000229	0	0	0	0	0	0	0	0	0
FBgn0000492	1	1	0	0	0	0	1	0	0
FBgn0039180	0	0	0	0	0	0	0	0	0
FBgn0034162	0	0	0	0	0	0	0	0	0
FBgn0031406	0	0	0	0	0	0	0	0	0
FBgn0031407	0	0	0	0	0	0	0	0	0
FBgn0039189	0	0	0	0	0	0	0	0	0
FBgn0039188	0	0	0	0	0	0	0	0	0
FBgn0037128	0	0	0	0	0	0	0	0	0
FBgn0037126	0	0	0	0	0	0	0	0	0
FBgn0037124	0	0	0	0	0	0	0	0	0
FBgn0037123	0	0	0	0	0	0	0	0	0
FBgn0037122	0	0	0	0	0	0	0	0	0
FBgn0037121	0	0	0	0	0	0	0	0	0
FBgn0025821	0	0	0	0	0	0	0	0	0
FBgn0025820	0	0	0	0	0	0	0	0	0
FBgn0025825	0	0	0	0	0	0	0	0	0
FBgn0025827	0	0	0	0	0	0	0	0	0
FBgn0039459	0	0	0	0	0	0	0	0	0
FBgn0039451	0	0	0	0	0	0	0	0	0
FBgn0039453	0	0	0	0	0	0	0	0	0
FBgn0033800	0	0	0	0	0	0	0	0	0
FBgn0033802	0	0	0	0	0	0	0	0	0
FBgn0034299	0	0	0	0	0	0	0	0	0
FBgn0034294	0	0	0	0	0	0	0	0	0
FBgn0034295	0	0	0	0	0	0	0	0	0
FBgn0034296	0	0	0	0	0	0	0	0	0
FBgn0034290	0	0	0	0	0	0	0	0	0
FBgn0034291	0	0	0	0	0	0	0	0	0
FBgn0031661	0	0	0	0	0	0	0	0	0
FBgn0014010	0	0	0	0	0	0	0	0	0
FBgn0030130	0	0	0	0	0	0	0	0	0
FBgn0038256	0	0	0	0	0	0	0	0	0
FBgn0038257	0	0	0	0	0	0	0	0	0
FBgn0050445	0	0	0	0	0	0	0	0	0
FBgn0050443	0	0	0	0	0	0	0	0	0
FBgn0050442	0	0	0	0	0	0	0	0	0
FBgn0050440	0	0	0	0	0	0	0	0	0
FBgn0036299	0	0	0	0	0	0	0	0	0
FBgn0036294	0	1	0	0	1	0	0	0	0
FBgn0036295	0	0	0	0	0	0	0	0	0
FBgn0036292	0	0	0	0	0	0	0	0	0
FBgn0036291	0	0	0	0	0	0	0	0	0
FBgn0034838	0	0	0	0	0	0	0	0	0
FBgn0034833	0	0	0	0	0	0	0	0	0
FBgn0034835	0	0	0	0	0	0	0	0	0
FBgn0038321	0	0	0	0	0	0	0	0	0
FBgn0038323	0	0	0	0	0	0	0	0	0
FBgn0038324	0	0	0	0	0	0	0	0	0
FBgn0038325	0	0	0	0	0	0	0	0	0
FBgn0038327	0	0	0	0	0	0	0	0	0
FBgn0035407	0	0	0	0	0	0	0	0	0
FBgn0035405	0	0	0	0	0	0	0	0	0
FBgn0035400	0	0	0	0	0	0	0	0	0
FBgn0035401	0	0	0	0	0	0	0	0	0
FBgn0036470	0	0	0	0	0	0	0	0	0
FBgn0036476	0	0	0	0	0	0	0	0	0
FBgn0033117	0	0	0	0	0	0	0	0	0
FBgn0033115	0	0	0	0	0	0	0	0	0
FBgn0036478	0	0	0	0	0	0	0	0	0
FBgn0036479	0	0	0	0	0	0	0	0	0
FBgn0052649	0	0	0	0	0	0	0	0	0
FBgn0005590	0	0	0	0	0	0	0	0	0
FBgn0040521	0	0	0	0	0	0	0	0	0
FBgn0004009	1	0	1	0	0	0	0	1	0
FBgn0001075	0	0	0	0	0	0	0	0	0
FBgn0004556	0	0	0	0	0	0	0	0	0
FBgn0002522	0	0	0	0	0	0	0	0	0
FBgn0002521	0	0	0	0	0	0	0	0	0
FBgn0002526	1	0	0	1	0	0	0	0	0
FBgn0002525	0	0	0	0	0	0	0	0	0
FBgn0002524	0	0	0	0	0	0	0	0	0
FBgn0013764	0	0	0	0	0	0	0	0	0
FBgn0052160	0	0	0	0	0	0	0	0	0
FBgn0025628	0	0	0	0	0	0	0	0	0
FBgn0025627	0	0	0	0	0	0	0	0	0
FBgn0025626	0	0	0	0	0	0	0	0	0
FBgn0025625	0	0	0	0	0	0	0	0	0
FBgn0025624	0	0	0	0	0	0	0	0	0
FBgn0025623	0	0	0	0	0	0	0	0	0
FBgn0052168	0	0	0	0	0	0	0	0	0
FBgn0025620	0	0	0	0	0	0	0	0	0
FBgn0035753	0	0	0	0	0	0	0	0	0
FBgn0039217	0	0	0	0	0	0	0	0	0
FBgn0029708	0	0	0	0	0	0	0	0	0
FBgn0029709	0	0	0	0	0	0	0	0	0
FBgn0039211	0	0	0	0	0	0	0	0	0
FBgn0039210	0	0	0	0	0	0	0	0	0
FBgn0029704	0	0	0	0	0	0	0	0	0
FBgn0029705	0	0	0	0	0	0	0	0	0
FBgn0029702	0	0	0	0	0	0	0	0	0
FBgn0029703	0	0	0	0	0	0	0	0	0
FBgn0008649	0	1	1	0	0	0	0	0	1
FBgn0037918	0	0	0	0	0	0	0	0	0
FBgn0037917	0	0	0	0	0	0	0	0	0
FBgn0037915	0	0	0	0	0	0	0	0	0
FBgn0062512	0	0	0	0	0	0	0	0	0
FBgn0062517	0	0	0	0	0	0	0	0	0
FBgn0027654	0	0	0	0	0	0	0	0	0
FBgn0051090	0	0	0	0	0	0	0	0	0
FBgn0039666	0	0	0	0	0	0	0	0	0
FBgn0039667	0	1	0	0	1	0	0	0	0
FBgn0003346	0	0	0	0	0	0	0	0	0
FBgn0039665	0	0	0	0	0	0	0	0	0
FBgn0003870	0	0	0	0	0	0	0	0	0
FBgn0003349	0	0	0	0	0	0	0	0	0
FBgn0024939	0	0	0	0	0	0	0	0	0
FBgn0051549	0	0	0	0	0	0	0	0	0
FBgn0020224	0	0	0	0	0	0	0	0	0
FBgn0031872	0	0	0	0	0	0	0	0	0
FBgn0031871	0	0	0	0	0	0	0	0	0
FBgn0031876	0	0	0	0	0	0	0	0	0
FBgn0031874	0	0	0	0	0	0	0	0	0
FBgn0031878	0	0	0	0	0	0	0	0	0
FBgn0028918	0	0	0	0	0	0	0	0	0
FBgn0028919	0	0	0	0	0	0	0	0	0
FBgn0040060	0	0	0	0	0	0	0	0	0
FBgn0040061	0	0	0	0	0	0	0	0	0
FBgn0034627	0	0	0	0	0	0	0	0	0
FBgn0034626	0	0	0	0	0	0	0	0	0
FBgn0040064	0	0	0	0	0	0	0	0	0
FBgn0040069	0	0	0	0	0	0	0	0	0
FBgn0034629	0	0	0	0	0	0	0	0	0
FBgn0038134	1	0	0	1	0	0	0	0	0
FBgn0038130	0	0	0	0	0	0	0	0	0
FBgn0038132	0	0	0	0	0	0	0	0	0
FBgn0051632	0	0	0	0	0	0	0	0	0
FBgn0040206	0	0	0	0	0	0	0	0	0
FBgn0040207	0	0	0	0	0	0	0	0	0
FBgn0010520	0	0	0	0	0	0	0	0	0
FBgn0015001	0	0	0	0	0	0	0	0	0
FBgn0051635	0	0	0	0	0	0	0	0	0
FBgn0051634	0	0	0	0	0	0	0	0	0
FBgn0040208	0	0	0	0	0	0	0	0	0
FBgn0051182	0	0	0	0	0	0	0	0	0
FBgn0038574	0	0	0	0	0	0	0	0	0
FBgn0038576	0	0	0	0	0	0	0	0	0
FBgn0021847	0	0	0	0	0	0	0	0	0
FBgn0021953	0	0	0	0	0	0	0	0	0
FBgn0051457	0	0	0	0	0	0	0	0	0
FBgn0051453	0	0	0	0	0	0	0	0	0
FBgn0051451	0	0	0	0	0	0	0	0	0
FBgn0035469	0	0	0	0	0	0	0	0	0
FBgn0051989	0	0	0	0	0	0	0	0	0
FBgn0051988	0	0	0	0	0	0	0	0	0
FBgn0000119	0	0	0	0	0	0	0	0	0
FBgn0030836	0	0	0	0	0	0	0	0	0
FBgn0020641	0	0	0	0	0	0	0	0	0
FBgn0030830	0	0	0	0	0	0	0	0	0
FBgn0030833	0	0	0	0	0	0	0	0	0
FBgn0010387	0	0	0	0	0	0	0	0	0
FBgn0030838	0	0	0	0	0	0	0	0	0
FBgn0000117	0	0	0	0	0	0	0	0	0
FBgn0010388	0	0	0	0	0	0	0	0	0
FBgn0085293	0	0	0	0	0	0	0	0	0
FBgn0085296	0	0	0	0	0	0	0	0	0
FBgn0010389	0	1	1	0	0	0	0	0	1
FBgn0036665	0	0	0	0	0	0	0	0	0
FBgn0036662	0	0	0	0	0	0	0	0	0
FBgn0036661	0	0	0	0	0	0	0	0	0
FBgn0036660	0	0	0	0	0	0	0	0	0
FBgn0032744	0	0	0	0	0	0	0	0	0
FBgn0032741	0	0	0	0	0	0	0	0	0
FBgn0032966	0	0	0	0	0	0	0	0	0
FBgn0032967	0	0	0	0	0	0	0	0	0
FBgn0001197	0	0	0	0	0	0	0	0	0
FBgn0005563	0	0	0	0	0	0	0	0	0
FBgn0005564	0	0	1	0	0	1	0	0	0
FBgn0003975	0	0	0	0	0	0	0	0	0
FBgn0003970	0	0	0	0	0	0	0	0	0
FBgn0013954	0	0	0	0	0	0	0	0	0
FBgn0013953	0	0	0	0	0	0	0	0	0
FBgn0001229	0	0	0	0	0	0	0	0	0
FBgn0053178	0	0	0	0	0	0	0	0	0
FBgn0004618	0	0	0	0	0	0	0	0	0
FBgn0001222	0	0	0	0	0	0	0	0	0
FBgn0001225	0	0	0	0	0	0	0	0	0
FBgn0053174	0	0	0	0	0	0	0	0	0
FBgn0001226	0	0	0	0	0	0	0	0	0
FBgn0033569	0	0	0	0	0	0	0	0	0
FBgn0005694	0	0	0	0	0	0	0	0	0
FBgn0033566	0	0	0	0	0	0	0	0	0
FBgn0035211	0	0	0	0	0	0	0	0	0
FBgn0035210	0	0	0	0	0	0	0	0	0
FBgn0024230	0	0	0	0	0	0	0	0	0
FBgn0024728	0	0	0	0	0	0	0	0	0
FBgn0039373	0	0	0	0	0	0	0	0	0
FBgn0038957	0	0	0	0	0	0	0	0	0
FBgn0038484	0	0	0	0	0	0	0	0	0
FBgn0038487	0	0	0	0	0	0	0	0	0
FBgn0038486	0	0	0	0	0	0	0	0	0
FBgn0038481	0	0	0	0	0	0	0	0	0
FBgn0038951	0	0	0	0	0	0	0	0	0
FBgn0038950	0	0	0	0	0	0	0	0	0
FBgn0038489	0	0	0	0	0	0	0	0	0
FBgn0038488	0	0	0	0	0	0	0	0	0
FBgn0042118	0	0	0	0	0	0	0	0	0
FBgn0042119	0	0	0	0	0	0	0	0	0
FBgn0042112	0	0	0	0	0	0	0	0	0
FBgn0003598	0	0	0	0	0	0	0	0	0
FBgn0043578	0	0	0	0	0	0	0	0	0
FBgn0043576	0	0	0	0	0	0	0	0	0
FBgn0019929	0	0	0	0	0	0	0	0	0
FBgn0019928	0	0	0	0	0	0	0	0	0
FBgn0052405	0	0	0	0	0	0	0	0	0
FBgn0052406	0	0	0	0	0	0	0	0	0
FBgn0029512	0	0	0	0	0	0	0	0	0
FBgn0029514	0	0	0	0	0	0	0	0	0
FBgn0043792	0	0	0	0	0	0	0	0	0
FBgn0043791	1	0	0	1	0	0	0	0	0
FBgn0043796	0	0	0	0	0	0	0	0	0
FBgn0000477	0	0	0	0	0	0	0	0	0
FBgn0004838	0	0	0	0	0	0	0	0	0
FBgn0033031	0	0	0	0	0	0	0	0	0
FBgn0034109	0	0	0	0	0	0	0	0	0
FBgn0036046	0	0	0	0	0	0	0	0	0
FBgn0031465	0	0	0	0	0	0	0	0	0
FBgn0034107	0	0	0	0	0	0	0	0	0
FBgn0031461	0	0	0	0	0	0	0	0	0
FBgn0031443	0	0	0	0	0	0	0	0	0
FBgn0037101	0	0	0	0	0	0	0	0	0
FBgn0030332	0	0	0	0	0	0	0	0	0
FBgn0030330	0	0	0	0	0	0	0	0	0
FBgn0031440	0	0	0	0	0	0	0	0	0
FBgn0037455	0	0	0	0	0	0	0	0	0
FBgn0030485	0	0	0	0	0	0	0	0	0
FBgn0037108	0	0	0	0	0	0	0	0	0
FBgn0030486	0	0	0	0	0	0	0	0	0
FBgn0030481	0	0	0	0	0	0	0	0	0
FBgn0030482	0	0	0	0	0	0	0	0	0
FBgn0000617	0	0	0	0	0	0	0	0	0
FBgn0000615	0	0	0	0	0	0	0	0	0
FBgn0033827	0	0	0	0	0	0	0	0	0
FBgn0033822	0	1	0	0	1	0	0	0	0
FBgn0033820	0	0	0	0	0	0	0	0	0
FBgn0031681	0	0	0	0	0	0	0	0	0
FBgn0031682	0	0	0	0	0	0	0	0	0
FBgn0031683	0	0	0	0	0	0	0	0	0
FBgn0015924	0	0	0	0	0	0	0	0	0
FBgn0031689	0	0	0	0	0	0	0	0	0
FBgn0015929	0	0	0	0	0	0	0	0	0
FBgn0037475	0	0	0	0	0	0	0	0	0
FBgn0014032	0	0	0	0	0	0	0	0	0
FBgn0030159	0	0	0	0	0	0	0	0	0
FBgn0030158	0	0	0	0	0	0	0	0	0
FBgn0027111	1	1	1	0	0	0	0	0	0
FBgn0031150	0	0	0	0	0	0	0	0	0
FBgn0034656	0	0	0	0	0	0	0	0	0
FBgn0050461	0	0	0	0	0	0	0	0	0
FBgn0050465	0	0	0	0	0	0	0	0	0
FBgn0050467	0	0	0	0	0	0	0	0	0
FBgn0085330	0	0	0	0	0	0	0	0	0
FBgn0085337	0	0	0	0	0	0	0	0	0
FBgn0085336	0	0	0	0	0	0	0	0	0
FBgn0033350	0	0	0	0	0	0	0	0	0
FBgn0036273	0	0	0	0	0	0	0	0	0
FBgn0036274	0	0	0	0	0	0	0	0	0
FBgn0036278	0	0	0	0	0	0	0	0	0
FBgn0031157	0	0	0	0	0	0	0	0	0
FBgn0044020	0	0	0	0	0	0	0	0	0
FBgn0034816	0	0	0	0	0	0	0	0	0
FBgn0010198	0	0	0	0	0	0	0	0	0
FBgn0034814	0	0	0	0	0	0	0	0	0
FBgn0010197	0	0	0	0	0	0	0	0	0
FBgn0038302	0	0	0	0	0	0	0	0	0
FBgn0038303	0	0	0	0	0	0	0	0	0
FBgn0038300	0	0	0	0	0	0	0	0	0
FBgn0038301	0	0	0	0	0	0	0	0	0
FBgn0011224	0	0	0	0	0	0	0	0	0
FBgn0033680	0	0	0	0	0	0	0	0	0
FBgn0033686	0	0	0	0	0	0	0	0	0
FBgn0033174	0	0	0	0	0	0	0	0	0
FBgn0036416	0	0	0	0	0	0	0	0	0
FBgn0036417	0	0	0	0	0	0	0	0	0
FBgn0033170	0	0	0	0	0	0	0	0	0
FBgn0013563	0	0	0	0	0	0	0	0	0
FBgn0033178	0	0	0	0	0	0	0	0	0
FBgn0051849	0	0	0	0	0	0	0	0	0
FBgn0015745	0	0	0	0	0	0	0	0	0
FBgn0032889	0	0	0	0	0	0	0	0	0
FBgn0032886	0	0	0	0	0	0	0	0	0
FBgn0032885	0	0	0	0	0	0	0	0	0
FBgn0032884	0	0	0	0	0	0	0	0	0
FBgn0032883	0	0	0	0	0	0	0	0	0
FBgn0032882	0	0	0	0	0	0	0	0	0
FBgn0051847	0	0	0	0	0	0	0	0	0
FBgn0004574	0	0	0	0	0	0	0	0	0
FBgn0004573	0	0	0	0	0	0	0	0	0
FBgn0013749	0	0	0	0	0	0	0	0	0
FBgn0030791	0	0	0	0	0	0	0	0	0
FBgn0013743	0	0	0	0	0	0	0	0	0
FBgn0032087	0	0	0	0	0	0	0	0	0
FBgn0032082	0	0	0	0	0	0	0	0	0
FBgn0026193	0	0	0	0	0	0	0	0	0
FBgn0032089	0	0	0	0	0	0	0	0	0
FBgn0032088	0	0	0	0	0	0	0	0	0
FBgn0025352	0	0	0	0	0	0	0	0	0
FBgn0025608	0	0	0	0	0	0	0	0	0
FBgn0028582	0	0	0	0	0	0	0	0	0
FBgn0039238	0	0	0	0	0	0	0	0	0
FBgn0032229	0	0	0	0	0	0	0	0	0
FBgn0052109	0	0	0	0	0	0	0	0	0
FBgn0032223	0	0	0	0	0	0	0	0	0
FBgn0039941	0	0	0	0	0	0	0	0	0
FBgn0039232	0	0	0	0	0	0	0	0	0
FBgn0039235	0	0	0	0	0	0	0	0	0
FBgn0039234	0	0	0	0	0	0	0	0	0
FBgn0039945	0	0	0	0	0	0	0	0	0
FBgn0029724	0	0	0	0	0	0	0	0	0
FBgn0029723	0	0	0	0	0	0	0	0	0
FBgn0035685	0	0	0	0	0	0	0	0	0
FBgn0015300	0	0	0	0	0	0	0	0	0
FBgn0044817	0	0	0	0	0	0	0	0	0
FBgn0016047	0	0	0	0	0	0	0	0	0
FBgn0003366	0	0	0	0	0	0	0	0	0
FBgn0003360	0	0	0	0	0	0	0	0	0
FBgn0035287	0	0	0	0	0	0	0	0	0
FBgn0038548	0	0	0	0	0	0	0	0	0
FBgn0038549	0	0	0	0	0	0	0	0	0
FBgn0038540	0	0	0	0	0	0	0	0	0
FBgn0035021	0	0	0	0	0	0	0	0	0
FBgn0035022	0	0	0	0	0	0	0	0	0
FBgn0035023	0	0	0	0	0	0	0	0	0
FBgn0038545	0	0	0	0	0	0	0	0	0
FBgn0038547	0	0	0	0	0	0	0	0	0
FBgn0029989	0	0	0	0	0	0	0	0	0
FBgn0029980	0	0	0	0	0	0	0	0	0
FBgn0029986	0	0	0	0	0	0	0	0	0
FBgn0029987	0	0	0	0	0	0	0	0	0
FBgn0031855	0	0	0	0	0	0	0	0	0
FBgn0031850	1	0	0	1	0	0	0	0	0
FBgn0031859	0	0	0	0	0	0	0	0	0
FBgn0031858	0	0	0	0	0	0	0	0	0
FBgn0034318	0	0	0	0	0	0	0	0	0
FBgn0031148	0	0	0	0	0	0	0	0	0
FBgn0034649	0	0	0	0	0	0	0	0	0
FBgn0034648	0	0	0	0	0	0	0	0	0
FBgn0034647	0	0	0	0	0	0	0	0	0
FBgn0034646	0	0	0	0	0	0	0	0	0
FBgn0015240	0	0	0	0	0	0	0	0	0
FBgn0034312	0	0	0	0	0	0	0	0	0
FBgn0034315	0	0	0	0	0	0	0	0	0
FBgn0034314	0	0	0	0	0	0	0	0	0
FBgn0031145	0	0	0	0	0	0	0	0	0
FBgn0038150	0	0	0	0	0	0	0	0	0
FBgn0026188	0	0	0	0	0	0	0	0	0
FBgn0040950	0	0	0	0	0	0	0	0	0
FBgn0040227	0	0	0	0	0	0	0	0	0
FBgn0015024	0	0	0	0	0	0	0	0	0
FBgn0015025	0	0	0	0	0	0	0	0	0
FBgn0040954	0	0	0	0	0	0	0	0	0
FBgn0010053	0	0	0	0	0	0	0	0	0
FBgn0051612	0	0	0	0	0	0	0	0	0
FBgn0026323	0	0	0	0	0	0	0	0	0
FBgn0051619	0	0	0	0	0	0	0	0	0
FBgn0026324	0	0	0	0	0	0	0	0	0
FBgn0000286	0	0	0	0	0	0	0	0	0
FBgn0000287	0	0	0	0	0	0	0	0	0
FBgn0027589	0	0	0	0	0	0	0	0	0
FBgn0027584	0	0	0	0	0	0	0	0	0
FBgn0027585	0	0	0	0	0	0	0	0	0
FBgn0027586	0	0	0	0	0	0	0	0	0
FBgn0027587	0	0	0	0	0	0	0	0	0
FBgn0027580	0	0	0	0	0	0	0	0	0
FBgn0027583	0	0	0	0	0	0	0	0	0
FBgn0051472	0	0	0	0	0	0	0	0	0
FBgn0051475	0	0	0	0	0	0	0	0	0
FBgn0030817	0	0	0	0	0	0	0	0	0
FBgn0030814	0	0	0	0	0	0	0	0	0
FBgn0030813	0	0	0	0	0	0	0	0	0
FBgn0030810	0	0	0	0	0	0	0	0	0
FBgn0000137	0	0	0	0	0	0	0	0	0
FBgn0000139	0	0	0	0	0	0	0	0	0
FBgn0036643	0	0	0	0	0	0	0	0	0
FBgn0036648	0	0	0	0	0	0	0	0	0
FBgn0032946	0	0	0	0	0	0	0	0	0
FBgn0032763	0	0	0	0	0	0	0	0	0
FBgn0032760	0	0	0	0	0	0	0	0	0
FBgn0032945	0	0	0	0	0	0	0	0	0
FBgn0004903	0	0	0	0	0	0	0	0	0
FBgn0032769	0	0	0	0	0	0	0	0	0
FBgn0020440	0	0	0	0	0	0	0	0	0
FBgn0013972	0	0	0	0	0	0	0	0	0
FBgn0004635	0	0	1	0	0	1	0	0	0
FBgn0004636	0	0	0	0	0	0	0	0	0
FBgn0053110	0	0	0	0	0	0	0	0	0
FBgn0053111	0	0	0	0	0	0	0	0	0
FBgn0053113	0	0	0	0	0	0	0	0	0
FBgn0032340	0	0	0	0	0	0	0	0	0
FBgn0011828	0	0	0	0	0	0	0	0	0
FBgn0032342	0	0	0	0	0	0	0	0	0
FBgn0033549	0	0	0	0	0	0	0	0	0
FBgn0033540	1	1	0	0	0	0	1	0	0
FBgn0033543	0	0	0	0	0	0	0	0	0
FBgn0024211	0	0	0	0	0	0	0	0	0
FBgn0035234	0	0	0	0	0	0	0	0	0
FBgn0035236	0	0	0	0	0	0	0	0	0
FBgn0035231	0	0	0	0	0	0	0	0	0
FBgn0033374	0	0	0	0	0	0	0	0	0
FBgn0035233	0	0	0	0	0	0	0	0	0
FBgn0035232	0	0	0	0	0	0	0	0	0
FBgn0035238	0	0	0	0	0	0	0	0	0
FBgn0032310	0	0	0	0	0	0	0	0	0
FBgn0062943	0	0	0	0	0	0	0	0	0
FBgn0038971	0	0	0	0	0	0	0	0	0
FBgn0038973	0	0	0	0	0	0	0	0	0
FBgn0038972	0	0	0	0	0	0	0	0	0
FBgn0038974	0	0	0	0	0	0	0	0	0
FBgn0002772	0	1	1	0	0	0	0	0	1
FBgn0002773	0	1	0	0	1	0	0	0	0
FBgn0052647	0	0	0	0	0	0	0	0	0
FBgn0033749	0	0	0	0	0	0	0	0	0
FBgn0002775	0	0	0	0	0	0	0	0	0
FBgn0002778	0	0	0	0	0	0	0	0	0
FBgn0033748	0	0	0	0	0	0	0	0	0
FBgn0037656	0	0	0	0	0	0	0	0	0
FBgn0042174	0	0	0	0	0	0	0	0	0
FBgn0042177	0	0	0	0	0	0	0	0	0
FBgn0052394	0	0	0	0	0	0	0	0	0
FBgn0052396	0	0	0	0	0	0	0	0	0
FBgn0052393	0	0	0	0	0	0	0	0	0
FBgn0052392	0	0	0	0	0	0	0	0	0
FBgn0052399	0	0	0	0	0	0	0	0	0
FBgn0028913	0	0	0	0	0	0	0	0	0
FBgn0029067	0	0	0	0	0	0	0	0	0
FBgn0037897	0	0	0	0	0	0	0	0	0
FBgn0037895	0	0	0	0	0	0	0	0	0
FBgn0037894	0	0	0	0	0	0	0	0	0
FBgn0026666	0	0	0	0	0	0	0	0	0
FBgn0000455	0	0	0	0	0	0	0	0	0
FBgn0000454	0	0	0	0	0	0	0	0	0
FBgn0000451	0	0	0	0	0	0	0	0	0
FBgn0000459	0	0	0	0	0	0	0	0	0
FBgn0039141	0	0	0	0	0	0	0	0	0
FBgn0039140	0	0	0	0	0	0	0	0	0
FBgn0039147	0	0	0	0	0	0	0	0	0
FBgn0039145	0	0	0	0	0	0	0	0	0
FBgn0039144	0	0	0	0	0	0	0	0	0
FBgn0034127	0	0	0	0	0	0	0	0	0
FBgn0031333	0	0	0	0	0	0	0	0	0
FBgn0031335	0	0	0	0	0	0	0	0	0
FBgn0034120	0	0	0	0	0	0	0	0	0
FBgn0031449	0	0	0	0	0	0	0	0	0
FBgn0000639	0	0	0	0	0	0	0	0	0
FBgn0030317	1	0	0	1	0	0	0	0	0
FBgn0030311	0	0	0	0	0	0	0	0	0
FBgn0037473	0	0	0	0	0	0	0	0	0
FBgn0037472	0	0	0	0	0	0	0	0	0
FBgn0000636	0	0	1	0	0	1	0	0	0
FBgn0011592	0	0	0	0	0	0	0	0	0
FBgn0011591	0	0	0	0	0	0	0	0	0
FBgn0011596	0	0	0	0	0	0	0	0	0
FBgn0039494	0	0	0	0	0	0	0	0	0
FBgn0039492	0	0	0	0	0	0	0	0	0
FBgn0039498	0	0	0	0	0	0	0	0	0
FBgn0030174	0	0	0	0	0	0	0	0	0
FBgn0015905	0	0	0	0	0	0	0	0	0
FBgn0015904	0	0	0	0	0	0	0	0	0
FBgn0036950	0	0	0	0	0	0	0	0	0
FBgn0036953	0	0	0	0	0	0	0	0	0
FBgn0036952	0	0	0	0	0	0	0	0	0
FBgn0030500	0	0	0	0	0	0	0	0	0
FBgn0036956	0	0	0	0	0	0	0	0	0
FBgn0034783	0	0	0	0	0	0	0	0	0
FBgn0034788	0	0	0	0	0	0	0	0	0
FBgn0051284	0	0	0	0	0	0	0	0	0
FBgn0051288	0	0	0	0	0	0	0	0	0
FBgn0036258	0	0	0	0	0	0	0	0	0
FBgn0033379	0	0	0	0	0	0	0	0	0
FBgn0037834	0	0	0	0	0	0	0	0	0
FBgn0033373	0	0	0	0	0	0	0	0	0
FBgn0085316	0	0	0	0	0	0	0	0	0
FBgn0033376	0	0	0	0	0	0	0	0	0
FBgn0033375	0	0	0	0	0	0	0	0	0
FBgn0036785	0	0	0	0	0	0	0	0	0
FBgn0036786	0	0	0	0	0	0	0	0	0
FBgn0036787	0	0	0	0	0	0	0	0	0
FBgn0036781	0	0	0	0	0	0	0	0	0
FBgn0036783	0	0	0	0	0	0	0	0	0
FBgn0032938	0	0	0	0	0	0	0	0	0
FBgn0034871	0	0	0	0	0	0	0	0	0
FBgn0034878	0	0	0	0	0	0	0	0	0
FBgn0030178	0	0	0	0	0	0	0	0	0
FBgn0038366	0	0	0	0	0	0	0	0	0
FBgn0038360	0	0	0	0	0	0	0	0	0
FBgn0030170	0	0	0	0	0	0	0	0	0
FBgn0002940	0	0	0	0	0	0	0	0	0
FBgn0037781	0	0	0	0	0	0	0	0	0
FBgn0037780	0	0	0	0	0	0	0	0	0
FBgn0033159	0	0	0	0	0	0	0	0	0
FBgn0036436	0	0	0	0	0	0	0	0	0
FBgn0036437	0	0	0	0	0	0	0	0	0
FBgn0033154	0	0	0	0	0	0	0	0	0
FBgn0033155	0	0	0	0	0	0	0	0	0
FBgn0036433	0	0	0	0	0	0	0	0	0
FBgn0010313	0	0	0	0	0	0	0	0	0
FBgn0031639	0	0	0	0	0	0	0	0	0
FBgn0015763	0	0	0	0	0	0	0	0	0
FBgn0010317	0	0	0	0	0	0	0	0	0
FBgn0010315	0	0	0	0	0	0	0	0	0
FBgn0015766	0	0	0	0	0	0	0	0	0
FBgn0015765	0	0	0	0	0	0	0	0	0
FBgn0051869	0	0	0	0	0	0	0	0	0
FBgn0064237	0	0	0	0	0	0	0	0	0
FBgn0025378	0	0	0	0	0	0	0	0	0
FBgn0039969	0	0	0	0	0	0	0	0	0
FBgn0032208	0	0	0	0	0	0	0	0	0
FBgn0039965	0	0	0	0	0	0	0	0	0
FBgn0032204	0	0	0	0	0	0	0	0	0
FBgn0032207	0	0	0	0	0	0	0	0	0
FBgn0039966	0	0	0	0	0	0	0	0	0
FBgn0032203	0	0	0	0	0	0	0	0	0
FBgn0032202	0	0	0	0	0	0	0	0	0
FBgn0002566	0	0	0	0	0	0	0	0	0
FBgn0002565	0	0	0	0	0	0	0	0	0
FBgn0002564	0	0	0	0	0	0	0	0	0
FBgn0002563	0	0	0	0	0	0	0	0	0
FBgn0002561	1	1	0	0	0	0	1	0	0
FBgn0024689	0	0	0	0	0	0	0	0	0
FBgn0003380	0	0	0	0	0	0	0	0	0
FBgn0022359	0	0	0	0	0	0	0	0	0
FBgn0003386	0	0	0	0	0	0	0	0	0
FBgn0003388	0	0	0	0	0	0	0	0	0
FBgn0024975	0	0	0	0	0	0	0	0	0
FBgn0035001	0	0	0	0	0	0	0	0	0
FBgn0035006	0	0	0	0	0	0	0	0	0
FBgn0035007	0	0	0	0	0	0	0	0	0
FBgn0038564	0	0	0	0	0	0	0	0	0
FBgn0024973	0	0	0	0	0	0	0	0	0
FBgn0038569	0	0	0	0	0	0	0	0	0
FBgn0020269	0	1	0	0	1	0	0	0	0
FBgn0031781	0	0	0	0	0	0	0	0	0
FBgn0031782	0	0	0	0	0	0	0	0	0
FBgn0031786	0	0	0	0	0	0	0	0	0
FBgn0052076	0	0	0	0	0	0	0	0	0
FBgn0063757	0	0	0	0	0	0	0	0	0
FBgn0034661	0	0	0	0	0	0	0	0	0
FBgn0034663	0	0	0	0	0	0	0	0	0
FBgn0034664	0	0	0	0	0	0	0	0	0
FBgn0040020	0	0	0	0	0	0	0	0	0
FBgn0038171	0	0	0	0	0	0	0	0	0
FBgn0038170	0	0	0	0	0	0	0	0	0
FBgn0038172	0	0	0	0	0	0	0	0	0
FBgn0038175	0	0	0	0	0	0	0	0	0
FBgn0038179	0	0	0	0	0	0	0	0	0
FBgn0038178	1	0	1	0	0	0	0	1	0
FBgn0030787	0	0	0	0	0	0	0	0	0
FBgn0030782	0	0	0	0	0	0	0	0	0
FBgn0030788	0	0	0	0	0	0	0	0	0
FBgn0011692	0	0	0	0	0	0	0	0	0
FBgn0011695	0	0	0	0	0	0	0	0	0
FBgn0011694	0	0	0	0	0	0	0	0	0
FBgn0015591	0	0	0	0	0	0	0	0	0
FBgn0051676	0	0	0	0	0	0	0	0	0
FBgn0051675	0	0	0	0	0	0	0	0	0
FBgn0051673	0	0	0	0	0	0	0	0	0
FBgn0040236	0	0	0	0	0	0	0	0	0
FBgn0039779	0	0	0	0	0	0	0	0	0
FBgn0039774	0	0	0	0	0	0	0	0	0
FBgn0039776	0	1	0	0	1	0	0	0	0
FBgn0039777	0	0	0	0	0	0	0	0	0
FBgn0051492	0	0	0	0	0	0	0	0	0
FBgn0037310	0	0	0	0	0	0	0	0	0
FBgn0037313	0	0	0	0	0	0	0	0	0
FBgn0037314	0	0	0	0	0	0	0	0	0
FBgn0037315	0	0	0	0	0	0	0	0	0
FBgn0037317	0	0	0	0	0	0	0	0	0
FBgn0014179	0	0	0	0	0	0	0	0	0
FBgn0000157	0	0	0	0	0	0	0	0	0
FBgn0004431	0	0	0	0	0	0	0	0	0
FBgn0004922	0	0	0	0	0	0	0	0	0
FBgn0032921	0	0	0	0	0	0	0	0	0
FBgn0004926	0	0	0	0	0	0	0	0	0
FBgn0004381	0	0	0	0	0	0	0	0	0
FBgn0004657	0	0	0	0	0	0	0	0	0
FBgn0004656	0	0	0	0	0	0	0	0	0
FBgn0004654	0	0	0	0	0	0	0	0	0
FBgn0004652	0	0	0	0	0	0	0	0	0
FBgn0004650	0	0	0	0	0	0	0	0	0
FBgn0033527	0	0	0	0	0	0	0	0	0
FBgn0033524	0	0	0	0	0	0	0	0	0
FBgn0033523	0	0	0	0	0	0	0	0	0
FBgn0033522	0	0	0	0	0	0	0	0	0
FBgn0033528	0	0	0	0	0	0	0	0	0
FBgn0035257	0	0	0	0	0	0	0	0	0
FBgn0035254	0	0	0	0	0	0	0	0	0
FBgn0035253	0	0	0	0	0	0	0	0	0
FBgn0035251	0	0	0	0	0	0	0	0	0
FBgn0031944	0	0	0	0	0	0	0	0	0
FBgn0066114	0	0	0	0	0	0	0	0	0
FBgn0028687	0	0	0	0	0	0	0	0	0
FBgn0028685	0	0	0	0	0	0	0	0	0
FBgn0028688	0	0	0	0	0	0	0	0	0
FBgn0030237	0	0	0	0	0	0	0	0	0
FBgn0038993	0	0	0	0	0	0	0	0	0
FBgn0002715	0	0	0	0	0	0	0	0	0
FBgn0052666	0	0	0	0	0	0	0	0	0
FBgn0031240	0	0	0	0	0	0	0	0	0
FBgn0031717	0	0	0	0	0	0	0	0	0
FBgn0052912	0	0	0	0	0	0	0	0	0
FBgn0031247	0	0	0	0	0	0	0	0	0
FBgn0032374	0	0	0	0	0	0	0	0	0
FBgn0003449	0	0	0	0	0	0	0	0	0
FBgn0003448	1	0	0	1	0	0	0	0	0
FBgn0003444	0	0	0	0	0	0	0	0	0
FBgn0039165	0	0	0	0	0	0	0	0	0
FBgn0031318	0	0	0	0	0	0	0	0	0
FBgn0031319	0	0	0	0	0	0	0	0	0
FBgn0039161	0	0	0	0	0	0	0	0	0
FBgn0039160	0	0	0	0	0	0	0	0	0
FBgn0031313	0	1	1	0	0	0	0	0	1
FBgn0031310	0	0	0	0	0	0	0	0	0
FBgn0039169	0	0	0	0	0	0	0	0	0
FBgn0039168	0	0	0	0	0	0	0	0	0
FBgn0031314	0	0	0	0	0	0	0	0	0
FBgn0031315	0	0	0	0	0	0	0	0	0
FBgn0000382	0	0	0	0	0	0	0	0	0
FBgn0000384	0	0	0	0	0	0	0	0	0
FBgn0011205	0	0	0	0	0	0	0	0	0
FBgn0030599	0	0	0	0	0	0	0	0	0
FBgn0030598	0	0	0	0	0	0	0	0	0
FBgn0040373	0	0	0	0	0	0	0	0	0
FBgn0038969	0	0	0	0	0	0	0	0	0
FBgn0038694	0	0	0	0	0	0	0	0	0
FBgn0038697	0	0	0	0	0	0	0	0	0
FBgn0038690	0	0	0	0	0	0	0	0	0
FBgn0038691	0	0	0	0	0	0	0	0	0
FBgn0037419	0	0	0	0	0	0	0	0	0
FBgn0030376	0	0	0	0	0	0	0	0	0
FBgn0037414	0	0	0	0	0	0	0	0	0
FBgn0030373	0	0	0	0	0	0	0	0	0
FBgn0037412	0	0	0	0	0	0	0	0	0
FBgn0037411	0	0	0	0	0	0	0	0	0
FBgn0030370	0	0	0	0	0	0	0	0	0
FBgn0036239	0	0	0	0	0	0	0	0	0
FBgn0033316	0	0	0	0	0	0	0	0	0
FBgn0033310	0	0	0	0	0	0	0	0	0
FBgn0034509	0	0	0	0	0	0	0	0	0
FBgn0034858	0	0	0	0	0	0	0	0	0
FBgn0034859	0	0	0	0	0	0	0	0	0
FBgn0034500	0	0	0	0	0	0	0	0	0
FBgn0034501	0	0	0	0	0	0	0	0	0
FBgn0034503	0	0	0	0	0	0	0	0	0
FBgn0034504	0	0	0	0	0	0	0	0	0
FBgn0034506	0	0	0	0	0	0	0	0	0
FBgn0023177	0	0	0	0	0	0	0	0	0
FBgn0038349	0	0	0	0	0	0	0	0	0
FBgn0038347	0	0	0	0	0	0	0	0	0
FBgn0038344	0	0	0	0	0	0	0	0	0
FBgn0038345	0	0	0	0	0	0	0	0	0
FBgn0038341	0	0	0	0	0	0	0	0	0
FBgn0030191	0	0	0	0	0	0	0	0	0
FBgn0047008	0	0	0	0	0	0	0	0	0
FBgn0030196	0	0	0	0	0	0	0	0	0
FBgn0005586	0	0	0	0	0	0	0	0	0
FBgn0040582	0	0	0	0	0	0	0	0	0
FBgn0015781	0	0	0	0	0	0	0	0	0
FBgn0010338	0	0	0	0	0	0	0	0	0
FBgn0015789	0	0	0	0	0	0	0	0	0
FBgn0015788	0	0	0	0	0	0	0	0	0
FBgn0010333	0	0	0	0	0	0	0	0	0
FBgn0030999	0	0	0	0	0	0	0	0	0
FBgn0051802	0	0	0	0	0	0	0	0	0
FBgn0030993	0	0	0	0	0	0	0	0	0
FBgn0030990	0	0	0	0	0	0	0	0	0
FBgn0030996	0	0	0	0	0	0	0	0	0
FBgn0030994	0	0	0	0	0	0	0	0	0
FBgn0032042	0	0	0	0	0	0	0	0	0
FBgn0032048	0	0	0	0	0	0	0	0	0
FBgn0041188	0	0	0	0	0	0	0	0	0
FBgn0041180	0	0	0	0	0	0	0	0	0
FBgn0041181	0	0	0	0	0	0	0	0	0
FBgn0041182	0	0	0	0	0	0	0	0	0
FBgn0041184	1	0	0	1	0	0	0	0	0
FBgn0045823	0	0	0	0	0	0	0	0	0
FBgn0010622	0	0	0	0	0	0	0	0	0
FBgn0053099	1	0	0	1	0	0	0	0	0
FBgn0053098	0	0	0	0	0	0	0	0	0
FBgn0039905	0	0	0	0	0	0	0	0	0
FBgn0010620	0	0	0	0	0	0	0	0	0
FBgn0032262	0	0	0	0	0	0	0	0	0
FBgn0032261	0	0	0	0	0	0	0	0	0
FBgn0053095	0	0	0	0	0	0	0	0	0
FBgn0053094	0	0	0	0	0	0	0	0	0
FBgn0053096	0	0	0	0	0	0	0	0	0
FBgn0002542	0	0	0	0	0	0	0	0	0
FBgn0003145	0	0	0	0	0	0	0	0	0
FBgn0003140	0	0	0	0	0	0	0	0	0
FBgn0053278	0	0	0	0	0	0	0	0	0
FBgn0003888	1	1	0	0	0	0	1	0	0
FBgn0022338	0	0	0	0	0	0	0	0	0
FBgn0003383	0	0	0	0	0	0	0	0	0
FBgn0024958	0	0	0	0	0	0	0	0	0
FBgn0024956	0	0	0	0	0	0	0	0	0
FBgn0035064	0	0	0	0	0	0	0	0	0
FBgn0035065	0	0	0	0	0	0	0	0	0
FBgn0038501	0	0	0	0	0	0	0	0	0
FBgn0035069	0	0	0	0	0	0	0	0	0
FBgn0031811	0	0	0	0	0	0	0	0	0
FBgn0031762	0	0	0	0	0	0	0	0	0
FBgn0031813	0	0	0	0	0	0	0	0	0
FBgn0031760	0	0	0	0	0	0	0	0	0
FBgn0031766	0	0	0	0	0	0	0	0	0
FBgn0031816	0	0	0	0	0	0	0	0	0
FBgn0031818	0	0	0	0	0	0	0	0	0
FBgn0031769	0	0	0	0	0	0	0	0	0
FBgn0052053	0	0	0	0	0	0	0	0	0
FBgn0052056	0	0	0	0	0	0	0	0	0
FBgn0052057	0	0	0	0	0	0	0	0	0
FBgn0028893	0	0	0	0	0	0	0	0	0
FBgn0028897	0	0	0	0	0	0	0	0	0
FBgn0028896	0	0	0	0	0	0	0	0	0
FBgn0028895	0	0	0	0	0	0	0	0	0
FBgn0040005	0	0	0	0	0	0	0	0	0
FBgn0031103	0	0	0	0	0	0	0	0	0
FBgn0043070	0	0	0	0	0	0	0	0	0
FBgn0026145	0	0	0	0	0	0	0	0	0
FBgn0026149	0	0	0	0	0	0	0	0	0
FBgn0026148	0	0	0	0	0	0	0	0	0
FBgn0051122	0	0	0	0	0	0	0	0	0
FBgn0051121	0	0	0	0	0	0	0	0	0
FBgn0051120	0	0	0	0	0	0	0	0	0
FBgn0051125	0	0	0	0	0	0	0	0	0
FBgn0035003	0	0	0	0	0	0	0	0	0
FBgn0051128	0	0	0	0	0	0	0	0	0
FBgn0038567	0	0	0	0	0	0	0	0	0
FBgn0038565	0	0	0	0	0	0	0	0	0
FBgn0039756	1	1	0	0	0	0	1	0	0
FBgn0039757	0	0	0	0	0	0	0	0	0
FBgn0039754	0	0	0	0	0	0	0	0	0
FBgn0039758	0	0	0	0	0	0	0	0	0
FBgn0039759	0	0	0	0	0	0	0	0	0
FBgn0037338	0	0	0	0	0	0	0	0	0
FBgn0037339	0	0	0	0	0	0	0	0	0
FBgn0037332	0	0	0	0	0	0	0	0	0
FBgn0037330	0	0	0	0	0	0	0	0	0
FBgn0037627	0	0	0	0	0	0	0	0	0
FBgn0037621	1	0	0	1	0	0	0	0	0
FBgn0000171	0	0	0	0	0	0	0	0	0
FBgn0001174	0	0	0	0	0	0	0	0	0
FBgn0001170	0	0	1	0	0	1	0	0	0
FBgn0004419	0	0	0	0	0	0	0	0	0
FBgn0033247	0	0	0	0	0	0	0	0	0
FBgn0050290	0	0	0	0	0	0	0	0	0
FBgn0050291	0	0	0	0	0	0	0	0	0
FBgn0050295	0	0	0	0	0	0	0	0	0
FBgn0033673	0	0	0	0	0	0	0	0	0
FBgn0003995	0	0	0	0	0	0	0	0	0
FBgn0037233	0	0	0	0	0	0	0	0	0
FBgn0003997	1	0	0	1	0	0	0	0	0
FBgn0027360	0	0	0	0	0	0	0	0	0
FBgn0027363	0	0	0	0	0	0	0	0	0
FBgn0037235	0	0	0	0	0	0	0	0	0
FBgn0033509	0	1	1	0	0	0	0	0	1
FBgn0036579	0	0	0	0	0	0	0	0	0
FBgn0036578	0	0	0	0	0	0	0	0	0
FBgn0033501	0	0	0	0	0	0	0	0	0
FBgn0033051	0	0	0	0	0	0	0	0	0
FBgn0033050	0	0	0	0	0	0	0	0	0
FBgn0033504	0	0	1	0	0	1	0	0	0
FBgn0033054	0	0	0	0	0	0	0	0	0
FBgn0037238	0	0	0	0	0	0	0	0	0
FBgn0032906	0	0	0	0	0	0	0	0	0
FBgn0032907	0	0	0	0	0	0	0	0	0
FBgn0032901	0	0	0	0	0	0	0	0	0
FBgn0035903	0	0	0	0	0	0	0	0	0
FBgn0035270	0	0	0	0	0	0	0	0	0
FBgn0035901	0	0	0	0	0	0	0	0	0
FBgn0035907	0	0	0	0	0	0	0	0	0
FBgn0035906	0	0	0	0	0	0	0	0	0
FBgn0035905	0	0	0	0	0	0	0	0	0
FBgn0035276	0	0	0	0	0	0	0	0	0
FBgn0021750	0	0	0	0	0	0	0	0	0
FBgn0002736	0	0	0	0	0	0	0	0	0
FBgn0002734	1	0	0	1	0	0	0	0	0
FBgn0002733	0	0	0	0	0	0	0	0	0
FBgn0019886	0	0	0	0	0	0	0	0	0
FBgn0032678	0	0	0	0	0	0	0	0	0
FBgn0032671	0	0	0	0	0	0	0	0	0
FBgn0032673	0	0	0	0	0	0	0	0	0
FBgn0039529	0	0	0	0	0	0	0	0	0
FBgn0033935	0	0	0	0	0	0	0	0	0
FBgn0003285	1	1	0	0	0	0	1	0	0
FBgn0030624	0	0	0	0	0	0	0	0	0
FBgn0001248	0	0	0	0	0	0	0	0	0
FBgn0000411	0	0	0	0	0	0	0	0	0
FBgn0000416	0	0	0	0	0	0	0	0	0
FBgn0039109	0	0	0	0	0	0	0	0	0
FBgn0039107	0	0	0	0	0	0	0	0	0
FBgn0003464	0	0	0	0	0	0	0	0	0
FBgn0039104	0	0	0	0	0	0	0	0	0
FBgn0003460	0	0	0	0	0	0	0	0	0
FBgn0003463	0	0	0	0	0	0	0	0	0
FBgn0003462	0	0	0	0	0	0	0	0	0
FBgn0031379	0	0	0	0	0	0	0	0	0
FBgn0031374	0	0	0	0	0	0	0	0	0
FBgn0031375	0	0	0	0	0	0	0	0	0
FBgn0031376	0	0	0	0	0	0	0	0	0
FBgn0031372	0	0	0	0	0	0	0	0	0
FBgn0017549	0	0	0	0	0	0	0	0	0
FBgn0017545	0	0	0	0	0	0	0	0	0
FBgn0036505	0	0	0	0	0	0	0	0	0
FBgn0016762	0	0	0	0	0	0	0	0	0
FBgn0016940	0	0	0	0	0	0	0	0	0
FBgn0036500	0	0	0	0	0	0	0	0	0
FBgn0036053	0	0	0	0	0	0	0	0	0
FBgn0037057	0	0	0	0	0	0	0	0	0
FBgn0015946	0	0	0	0	0	0	0	0	0
FBgn0015949	0	0	0	0	0	0	0	0	0
FBgn0031599	0	0	0	0	0	0	0	0	0
FBgn0031590	0	0	0	0	0	0	0	0	0
FBgn0031593	0	0	0	0	0	0	0	0	0
FBgn0031597	0	0	0	0	0	0	0	0	0
FBgn0037430	0	0	0	0	0	0	0	0	0
FBgn0030353	0	0	0	0	0	0	0	0	0
FBgn0030352	0	0	0	0	0	0	0	0	0
FBgn0030355	0	0	0	0	0	0	0	0	0
FBgn0030357	0	0	0	0	0	0	0	0	0
FBgn0030358	0	0	0	0	0	0	0	0	0
FBgn0036813	0	0	0	0	0	0	0	0	0
FBgn0036741	0	0	0	0	0	0	0	0	0
FBgn0033990	0	0	0	0	0	0	0	0	0
FBgn0036212	0	0	0	0	0	0	0	0	0
FBgn0036213	0	0	0	0	0	0	0	0	0
FBgn0036746	0	0	0	0	0	0	0	0	0
FBgn0031161	0	0	0	0	0	0	0	0	0
FBgn0034523	0	0	0	0	0	0	0	0	0
FBgn0034520	0	1	0	0	1	0	0	0	0
FBgn0034527	0	0	0	0	0	0	0	0	0
FBgn0002901	0	0	0	0	0	0	0	0	0
FBgn0011217	0	0	0	0	0	0	0	0	0
FBgn0026777	0	0	0	0	0	0	0	0	0
FBgn0051358	0	0	0	0	0	0	0	0	0
FBgn0010356	0	0	0	0	0	0	0	0	0
FBgn0010350	0	0	0	0	0	0	0	0	0
FBgn0051352	1	1	0	0	0	0	1	0	0
FBgn0051823	0	0	0	0	0	0	0	0	0
FBgn0010359	0	0	0	0	0	0	0	0	0
FBgn0051357	0	0	0	0	0	0	0	0	0
FBgn0037299	0	0	0	0	0	0	0	0	0
FBgn0037298	0	0	0	0	0	0	0	0	0
FBgn0037295	0	0	0	0	0	0	0	0	0
FBgn0037297	0	0	0	0	0	0	0	0	0
FBgn0037296	0	0	0	0	0	0	0	0	0
FBgn0037291	0	0	0	0	0	0	0	0	0
FBgn0037290	0	0	0	0	0	0	0	0	0
FBgn0037293	0	0	0	0	0	0	0	0	0
FBgn0037292	0	0	0	0	0	0	0	0	0
FBgn0050194	0	0	0	0	0	0	0	0	0
FBgn0050197	0	0	0	0	0	0	0	0	0
FBgn0032066	0	0	0	0	0	0	0	0	0
FBgn0032061	0	0	0	0	0	0	0	0	0
FBgn0004885	0	0	0	0	0	0	0	0	0
FBgn0032069	0	0	0	0	0	0	0	0	0
FBgn0032068	0	0	0	0	0	0	0	0	0
FBgn0004880	0	0	0	0	0	0	0	0	0
FBgn0033195	0	0	0	0	0	0	0	0	0
FBgn0039928	0	0	0	0	0	0	0	0	0
FBgn0039298	0	0	0	0	0	0	0	0	0
FBgn0039297	0	0	0	0	0	0	0	0	0
FBgn0039296	0	0	0	0	0	0	0	0	0
FBgn0039923	0	0	0	0	0	0	0	0	0
FBgn0039293	0	0	0	0	0	0	0	0	0
FBgn0032244	0	0	0	0	0	0	0	0	0
FBgn0032246	0	0	0	0	0	0	0	0	0
FBgn0053075	0	0	0	0	0	0	0	0	0
FBgn0052138	0	0	0	0	0	0	0	0	0
FBgn0037996	0	0	0	0	0	0	0	0	0
FBgn0037994	0	0	0	0	0	0	0	0	0
FBgn0053214	0	0	0	0	0	0	0	0	0
FBgn0053213	0	0	0	0	0	0	0	0	0
FBgn0037993	0	0	0	0	0	0	0	0	0
FBgn0037998	0	0	0	0	0	0	0	0	0
FBgn0037999	0	0	0	0	0	0	0	0	0
FBgn0028523	0	0	0	0	0	0	0	0	0
FBgn0028520	0	0	0	0	0	0	0	0	0
FBgn0028527	0	0	0	0	0	0	0	0	0
FBgn0025334	0	0	0	0	0	0	0	0	0
FBgn0028525	0	0	0	0	0	0	0	0	0
FBgn0028528	0	0	0	0	0	0	0	0	0
FBgn0029123	0	0	0	0	0	0	0	0	0
FBgn0038528	0	0	0	0	0	0	0	0	0
FBgn0035049	0	1	0	0	1	0	0	0	0
FBgn0035730	0	0	0	0	0	0	0	0	0
FBgn0038527	0	0	0	0	0	0	0	0	0
FBgn0038525	0	0	0	0	0	0	0	0	0
FBgn0035734	0	0	0	0	0	0	0	0	0
FBgn0035043	0	0	0	0	0	0	0	0	0
FBgn0035040	0	0	0	0	0	0	0	0	0
FBgn0035737	0	0	0	0	0	0	0	0	0
FBgn0003612	0	0	0	0	0	0	0	0	0
FBgn0031745	1	0	0	1	0	0	0	0	0
FBgn0031296	0	0	0	0	0	0	0	0	0
FBgn0031295	0	0	0	0	0	0	0	0	0
FBgn0031293	0	0	1	0	0	1	0	0	0
FBgn0031740	0	0	0	0	0	0	0	0	0
FBgn0031291	0	0	0	0	0	0	0	0	0
FBgn0031749	0	0	0	0	0	0	0	0	0
FBgn0031299	0	0	0	0	0	0	0	0	0
FBgn0031298	0	0	0	0	0	0	0	0	0
FBgn0017482	0	0	0	0	0	0	0	0	0
FBgn0052037	0	0	0	0	0	0	0	0	0
FBgn0052030	0	0	0	0	0	0	0	0	0
FBgn0052039	0	0	0	0	0	0	0	0	0
FBgn0025592	0	0	0	0	0	0	0	0	0
FBgn0043010	0	0	0	0	0	0	0	0	0
FBgn0026160	0	0	0	0	0	0	0	0	0
FBgn0043012	0	0	0	0	0	0	0	0	0
FBgn0016687	0	0	0	0	0	0	0	0	0
FBgn0016685	0	0	0	0	0	0	0	0	0
FBgn0016684	0	0	0	0	0	0	0	0	0
FBgn0051109	0	0	0	0	0	0	0	0	0
FBgn0051108	0	0	0	0	0	0	0	0	0
FBgn0031129	0	0	0	0	0	0	0	0	0
FBgn0039730	0	0	0	0	0	0	0	0	0
FBgn0039732	0	0	0	0	0	0	0	0	0
FBgn0039733	0	0	0	0	0	0	0	0	0
FBgn0039738	0	0	0	0	0	0	0	0	0
FBgn0031127	0	0	0	0	0	0	0	0	0
FBgn0030658	0	0	0	0	0	0	0	0	0
FBgn0030659	0	0	0	0	0	0	0	0	0
FBgn0037359	0	0	0	0	0	0	0	0	0
FBgn0037609	0	0	0	0	0	0	0	0	0
FBgn0037354	0	0	0	0	0	0	0	0	0
FBgn0037607	0	0	0	0	0	0	0	0	0
FBgn0014135	0	0	0	0	0	0	0	0	0
FBgn0030654	0	0	0	0	0	0	0	0	0
FBgn0030657	0	0	0	0	0	0	0	0	0
FBgn0011741	0	0	0	0	0	0	0	0	0
FBgn0011740	0	0	0	0	0	0	0	0	0
FBgn0011745	0	0	0	0	0	0	0	0	0
FBgn0037469	0	0	0	0	0	0	0	0	0
FBgn0040284	0	0	0	0	0	0	0	0	0
FBgn0040280	0	0	0	0	0	0	0	0	0
FBgn0040281	1	0	0	1	0	0	0	0	0
FBgn0040282	0	0	0	0	0	0	0	0	0
FBgn0040283	0	0	0	0	0	0	0	0	0
FBgn0035147	0	0	0	0	0	0	0	0	0
FBgn0038851	0	0	0	0	0	0	0	0	0
FBgn0020368	0	0	0	0	0	0	0	0	0
FBgn0014865	0	0	0	0	0	0	0	0	0
FBgn0050503	0	0	0	0	0	0	0	0	0
FBgn0038465	0	0	0	0	0	0	0	0	0
FBgn0014863	0	1	0	0	1	0	0	0	0
FBgn0038464	0	0	0	0	0	0	0	0	0
FBgn0033292	0	0	0	0	0	0	0	0	0
FBgn0033297	0	0	0	0	0	0	0	0	0
FBgn0027341	0	0	0	0	0	0	0	0	0
FBgn0034950	0	0	0	0	0	0	0	0	0
FBgn0034956	0	0	0	0	0	0	0	0	0
FBgn0038063	0	0	0	0	0	0	0	0	0
FBgn0033079	0	0	0	0	0	0	0	0	0
FBgn0035149	0	0	0	0	0	0	0	0	0
FBgn0036004	0	0	0	0	0	0	0	0	0
FBgn0033075	0	0	0	0	0	0	0	0	0
FBgn0033076	0	0	0	0	0	0	0	0	0
FBgn0036551	0	0	0	0	0	0	0	0	0
FBgn0039857	0	0	0	0	0	0	0	0	0
FBgn0036553	0	0	0	0	0	0	0	0	0
FBgn0033072	0	0	0	0	0	0	0	0	0
FBgn0032371	0	0	0	0	0	0	0	0	0
FBgn0015623	0	0	0	0	0	0	0	0	0
FBgn0015625	0	0	0	0	0	0	0	0	0
FBgn0001114	0	0	0	0	0	0	0	0	0
FBgn0001112	0	0	0	0	0	0	0	0	0
FBgn0035926	0	0	0	0	0	0	0	0	0
FBgn0035921	0	0	0	0	0	0	0	0	0
FBgn0035929	0	0	0	0	0	0	0	0	0
FBgn0028545	0	0	0	0	0	0	0	0	0
FBgn0021776	0	0	0	0	0	0	0	0	0
FBgn0037646	0	0	0	0	0	0	0	0	0
FBgn0001235	1	0	0	1	0	0	0	0	0
FBgn0037644	0	0	0	0	0	0	0	0	0
FBgn0052627	0	0	0	0	0	0	0	0	0
FBgn0052626	0	0	0	0	0	0	0	0	0
FBgn0037645	0	0	0	0	0	0	0	0	0
FBgn0034438	0	1	1	0	0	0	0	0	1
FBgn0032652	0	0	0	0	0	0	0	0	0
FBgn0032651	0	0	0	0	0	0	0	0	0
FBgn0032656	0	0	0	0	0	0	0	0	0
FBgn0032654	0	0	0	0	0	0	0	0	0
FBgn0025458	0	0	0	0	0	0	0	0	0
FBgn0052951	0	0	0	0	0	0	0	0	0
FBgn0052950	0	0	0	0	0	0	0	0	0
FBgn0025455	0	0	0	0	0	0	0	0	0
FBgn0052488	0	0	0	0	0	0	0	0	0
FBgn0003261	0	0	0	0	0	0	0	0	0
FBgn0029594	0	0	0	0	0	0	0	0	0
FBgn0062927	0	0	0	0	0	0	0	0	0
FBgn0039125	0	0	0	0	0	0	0	0	0
FBgn0039124	0	0	0	0	0	0	0	0	0
FBgn0039127	0	0	0	0	0	0	0	0	0
FBgn0039126	0	0	0	0	0	0	0	0	0
FBgn0039129	0	0	0	0	0	0	0	0	0
FBgn0039128	0	0	0	0	0	0	0	0	0
FBgn0031351	0	0	0	0	0	0	0	0	0
FBgn0031359	0	0	0	0	0	0	0	0	0
FBgn0017561	0	0	0	0	0	0	0	0	0
FBgn0038584	0	0	0	0	0	0	0	0	0
FBgn0012049	0	0	0	0	0	0	0	0	0
FBgn0035754	0	0	0	0	0	0	0	0	0
FBgn0011244	0	0	0	0	0	0	0	0	0
FBgn0011241	0	0	0	0	0	0	0	0	0
FBgn0035752	0	0	0	0	0	0	0	0	0
FBgn0044049	1	0	0	1	0	0	0	0	0
FBgn0037794	0	0	0	0	0	0	0	0	0
FBgn0036948	0	0	0	0	0	0	0	0	0
FBgn0032926	0	0	0	0	0	0	0	0	0
FBgn0034720	0	0	0	0	0	0	0	0	0
FBgn0034721	0	0	0	0	0	0	0	0	0
FBgn0034723	0	0	0	0	0	0	0	0	0
FBgn0034724	0	0	0	0	0	0	0	0	0
FBgn0034097	0	0	0	0	0	0	0	0	0
FBgn0034095	0	0	0	0	0	0	0	0	0
FBgn0034098	0	0	0	0	0	0	0	0	0
FBgn0034099	0	0	0	0	0	0	0	0	0
FBgn0038651	0	0	0	0	0	0	0	0	0
FBgn0038652	0	0	0	0	0	0	0	0	0
FBgn0038656	0	0	0	0	0	0	0	0	0
FBgn0038659	0	0	0	0	0	0	0	0	0
FBgn0032923	0	0	0	0	0	0	0	0	0
FBgn0036832	0	0	0	0	0	0	0	0	0
FBgn0036833	0	0	0	0	0	0	0	0	0
FBgn0036837	0	0	0	0	0	0	0	0	0
FBgn0030403	0	0	0	0	0	0	0	0	0
FBgn0036839	0	1	0	0	1	0	0	0	0
FBgn0034897	0	0	0	0	0	0	0	0	0
FBgn0034894	0	0	0	0	0	0	0	0	0
FBgn0010114	0	0	0	0	0	0	0	0	0
FBgn0034546	0	0	0	0	0	0	0	0	0
FBgn0038389	0	0	0	0	0	0	0	0	0
FBgn0034540	0	0	0	0	0	0	0	0	0
FBgn0038381	0	0	0	0	0	0	0	0	0
FBgn0038386	0	0	0	0	0	0	0	0	0
FBgn0038385	1	0	0	1	0	0	0	0	0
FBgn0019643	0	0	0	0	0	0	0	0	0
FBgn0015321	0	0	0	0	0	0	0	0	0
FBgn0015776	0	0	0	0	0	0	0	0	0
FBgn0037556	0	0	0	0	0	0	0	0	0
FBgn0062463	0	0	0	0	0	0	0	0	0
FBgn0000039	0	0	0	0	0	0	0	0	0
FBgn0000038	0	0	0	0	0	0	0	0	0
FBgn0025833	0	0	0	0	0	0	0	0	0
FBgn0036769	0	0	0	0	0	0	0	0	0
FBgn0036760	0	0	0	0	0	0	0	0	0
FBgn0085402	0	0	0	0	0	0	0	0	0
FBgn0031629	0	0	0	0	0	0	0	0	0
FBgn0032008	0	0	0	0	0	0	0	0	0
FBgn0032005	0	0	0	0	0	0	0	0	0
FBgn0032004	0	0	0	0	0	0	0	0	0
FBgn0032003	0	0	0	0	0	0	0	0	0
FBgn0032002	1	1	0	0	0	0	1	0	0
FBgn0032000	0	0	0	0	0	0	0	0	0
FBgn0037019	0	0	0	0	0	0	0	0	0
FBgn0037018	0	0	0	0	0	0	0	0	0
FBgn0004867	0	0	0	0	0	0	0	0	0
FBgn0004868	0	0	0	0	0	0	0	0	0
FBgn0037011	0	0	0	0	0	0	0	0	0
FBgn0037016	0	0	0	0	0	0	0	0	0
FBgn0037015	0	0	0	0	0	0	0	0	0
FBgn0005695	0	0	0	0	0	0	0	0	0
FBgn0036498	0	0	0	0	0	0	0	0	0
FBgn0036499	0	0	0	0	0	0	0	0	0
FBgn0036494	0	0	0	0	0	0	0	0	0
FBgn0036496	0	0	0	0	0	0	0	0	0
FBgn0001325	0	0	0	0	0	0	0	0	0
FBgn0053056	0	0	0	0	0	0	0	0	0
FBgn0001321	0	0	0	0	0	0	0	0	0
FBgn0001323	0	0	0	0	0	0	0	0	0
FBgn0053234	0	0	0	0	0	0	0	0	0
FBgn0024191	0	0	0	0	0	0	0	0	0
FBgn0038897	0	0	0	0	0	0	0	0	0
FBgn0038892	0	0	0	0	0	0	0	0	0
FBgn0033710	0	0	0	0	0	0	0	0	0
FBgn0033713	0	0	0	0	0	0	0	0	0
FBgn0033714	0	0	0	0	0	0	0	0	0
FBgn0033715	0	0	0	0	0	0	0	0	0
FBgn0033717	0	0	0	0	0	0	0	0	0
FBgn0028507	0	0	0	0	0	0	0	0	0
FBgn0028506	0	0	0	0	0	0	0	0	0
FBgn0022935	0	0	0	0	0	0	0	0	0
FBgn0028509	0	0	0	0	0	0	0	0	0
FBgn0024991	0	0	0	0	0	0	0	0	0
FBgn0035713	0	0	0	0	0	0	0	0	0
FBgn0035710	1	1	1	0	0	0	0	0	0
FBgn0035715	0	0	0	0	0	0	0	0	0
FBgn0035719	0	0	0	0	0	0	0	0	0
FBgn0052548	0	0	0	0	0	0	0	0	0
FBgn0032408	0	0	0	0	0	0	0	0	0
FBgn0030802	0	0	0	0	0	0	0	0	0
FBgn0063261	0	0	0	0	0	0	0	0	0
FBgn0045761	0	0	0	0	0	0	0	0	0
FBgn0025712	0	0	0	0	0	0	0	0	0
FBgn0025716	0	0	0	0	0	0	0	0	0
FBgn0051759	0	0	0	0	0	0	0	0	0
FBgn0040382	0	0	0	0	0	0	0	0	0
FBgn0031726	0	0	0	0	0	0	0	0	0
FBgn0031723	0	0	0	0	0	0	0	0	0
FBgn0031722	0	0	0	0	0	0	0	0	0
FBgn0031721	0	0	0	0	0	0	0	0	0
FBgn0030098	0	0	0	0	0	0	0	0	0
FBgn0030096	0	0	0	0	0	0	0	0	0
FBgn0030097	0	0	0	0	0	0	0	0	0
FBgn0030092	0	0	0	0	0	0	0	0	0
FBgn0030093	0	0	0	0	0	0	0	0	0
FBgn0030091	0	0	0	0	0	0	0	0	0
FBgn0039719	0	0	0	0	0	0	0	0	0
FBgn0039714	0	0	0	0	0	0	0	0	0
FBgn0039715	0	0	0	0	0	0	0	0	0
FBgn0039712	0	0	0	0	0	0	0	0	0
FBgn0039713	0	0	0	0	0	0	0	0	0
FBgn0039710	0	0	0	0	0	0	0	0	0
FBgn0039711	0	0	0	0	0	0	0	0	0
FBgn0034391	0	0	0	0	0	0	0	0	0
FBgn0034390	0	0	0	0	0	0	0	0	0
FBgn0034392	0	0	0	0	0	0	0	0	0
FBgn0034396	0	0	0	0	0	0	0	0	0
FBgn0034398	0	0	0	0	0	0	0	0	0
FBgn0030398	0	0	0	0	0	0	0	0	0
FBgn0037376	0	0	0	0	0	0	0	0	0
FBgn0037374	0	0	0	0	0	0	0	0	0
FBgn0037375	0	0	0	0	0	0	0	0	0
FBgn0037372	0	0	0	0	0	0	0	0	0
FBgn0037370	0	0	0	0	0	0	0	0	0
FBgn0037371	0	0	0	0	0	0	0	0	0
FBgn0030678	0	0	0	0	0	0	0	0	0
FBgn0030679	0	0	0	0	0	0	0	0	0
FBgn0037378	0	0	0	0	0	0	0	0	0
FBgn0030899	0	0	0	0	0	0	0	0	0
FBgn0011768	0	0	0	0	0	0	0	0	0
FBgn0011764	0	0	0	0	0	0	0	0	0
FBgn0011766	0	0	0	0	0	0	0	0	0
FBgn0011761	0	0	0	0	0	0	0	0	0
FBgn0011760	0	0	0	0	0	0	0	0	0
FBgn0029818	0	0	0	0	0	0	0	0	0
FBgn0029819	0	0	0	0	0	0	0	0	0
FBgn0029810	0	0	0	0	0	0	0	0	0
FBgn0029812	0	0	0	0	0	0	0	0	0
FBgn0029814	0	0	0	0	0	0	0	0	0
FBgn0029816	0	0	0	0	0	0	0	0	0
FBgn0051169	0	0	0	0	0	0	0	0	0
FBgn0037536	0	0	0	0	0	0	0	0	0
FBgn0051163	0	0	0	0	0	0	0	0	0
FBgn0000326	0	0	0	0	0	0	0	0	0
FBgn0033273	0	0	0	0	0	0	0	0	0
FBgn0033272	0	0	0	0	0	0	0	0	0
FBgn0033271	0	0	0	0	0	0	0	0	0
FBgn0033275	0	0	0	0	0	0	0	0	0
FBgn0033279	0	0	0	0	0	0	0	0	0
FBgn0034979	0	0	0	0	0	0	0	0	0
FBgn0034978	0	0	0	0	0	0	0	0	0
FBgn0034974	0	0	0	0	0	0	0	0	0
FBgn0083974	0	0	0	0	0	0	0	0	0
FBgn0034970	0	0	0	0	0	0	0	0	0
FBgn0038049	0	0	0	0	0	0	0	0	0
FBgn0038047	0	0	0	0	0	0	0	0	0
FBgn0038043	0	0	0	0	0	0	0	0	0
FBgn0038042	0	0	0	0	0	0	0	0	0
FBgn0033017	0	0	0	0	0	0	0	0	0
FBgn0036536	0	0	0	0	0	0	0	0	0
FBgn0033015	0	0	0	0	0	0	0	0	0
FBgn0036534	0	0	0	0	0	0	0	0	0
FBgn0036533	0	0	0	0	0	0	0	0	0
FBgn0036020	0	0	0	0	0	0	0	0	0
FBgn0036023	0	0	0	0	0	0	0	0	0
FBgn0033010	0	0	0	0	0	0	0	0	0
FBgn0013469	0	0	0	0	0	0	0	0	0
FBgn0033019	0	0	0	0	0	0	0	0	0
FBgn0036538	0	0	0	0	0	0	0	0	0
FBgn0015602	0	0	0	0	0	0	0	0	0
FBgn0015600	0	0	0	0	0	0	0	0	0
FBgn0051782	0	0	0	0	0	0	0	0	0
FBgn0015608	0	0	0	0	0	0	0	0	0
FBgn0001133	0	0	0	0	0	0	0	0	0
FBgn0001139	0	0	0	0	0	0	0	0	0
FBgn0001138	0	0	0	0	0	0	0	0	0
FBgn0002440	0	0	0	0	0	0	0	0	0
FBgn0005322	0	0	0	0	0	0	0	0	0
FBgn0028552	0	0	0	0	0	0	0	0	0
FBgn0039970	0	0	0	0	0	0	0	0	0
FBgn0030717	0	0	0	0	0	0	0	0	0
FBgn0005386	0	0	0	0	0	0	0	0	0
FBgn0034154	0	0	0	0	0	0	0	0	0
FBgn0032635	0	0	0	0	0	0	0	0	0
FBgn0023417	0	0	0	0	0	0	0	0	0
FBgn0024291	0	0	0	0	0	0	0	0	0
FBgn0024294	0	0	0	0	0	0	0	0	0
FBgn0035946	0	0	0	0	0	0	0	0	0
FBgn0035944	0	0	0	0	0	0	0	0	0
FBgn0035941	0	0	0	0	0	0	0	0	0
FBgn0028992	0	0	0	0	0	0	0	0	0
FBgn0028993	0	0	0	0	0	0	0	0	0
FBgn0028990	0	0	0	0	0	0	0	0	0
FBgn0028999	0	0	0	0	0	0	0	0	0
FBgn0003244	0	0	0	0	0	0	0	0	0
FBgn0085248	0	0	0	0	0	0	0	0	0
FBgn0003249	0	0	0	0	0	0	0	0	0
FBgn0003248	0	0	0	0	0	0	0	0	0
FBgn0037813	0	0	0	0	0	0	0	0	0
FBgn0037816	1	0	0	1	0	0	0	0	0
FBgn0037814	0	0	0	0	0	0	0	0	0
FBgn0037818	0	0	0	0	0	0	0	0	0
FBgn0062417	0	0	0	0	0	0	0	0	0
FBgn0003429	0	0	0	0	0	0	0	0	0
FBgn0037700	0	0	0	0	0	0	0	0	0
FBgn0042710	0	0	0	0	0	0	0	0	0
FBgn0034755	0	0	0	0	0	0	0	0	0
FBgn0028689	0	0	0	0	0	0	0	0	0
FBgn0034025	0	0	0	0	0	0	0	0	0
FBgn0035360	0	0	0	0	0	0	0	0	0
FBgn0035367	0	0	0	0	0	0	0	0	0
FBgn0034758	0	0	0	0	0	0	0	0	0
FBgn0016724	0	0	0	0	0	0	0	0	0
FBgn0016726	0	0	0	0	0	0	0	0	0
FBgn0030589	0	0	0	0	0	0	0	0	0
FBgn0037433	0	0	0	0	0	0	0	0	0
FBgn0034708	0	0	0	0	0	0	0	0	0
FBgn0034709	0	0	0	0	0	0	0	0	0
FBgn0034703	0	0	0	0	0	0	0	0	0
FBgn0034706	0	0	0	0	0	0	0	0	0
FBgn0034707	0	0	0	0	0	0	0	0	0
FBgn0038678	0	0	0	0	0	0	0	0	0
FBgn0038679	0	0	0	0	0	0	0	0	0
FBgn0038672	0	0	0	0	0	0	0	0	0
FBgn0038675	0	0	0	0	0	0	0	0	0
FBgn0052209	0	0	0	0	0	0	0	0	0
FBgn0030469	0	0	0	0	0	0	0	0	0
FBgn0030467	0	0	0	0	0	0	0	0	0
FBgn0030465	0	0	0	0	0	0	0	0	0
FBgn0052207	0	0	0	0	0	0	0	0	0
FBgn0052205	0	0	0	0	0	0	0	0	0
FBgn0052204	0	0	0	0	0	0	0	0	0
FBgn0036856	0	0	0	0	0	0	0	0	0
FBgn0036857	0	0	0	0	0	0	0	0	0
FBgn0036882	1	0	0	1	0	0	0	0	0
FBgn0034567	0	0	0	0	0	0	0	0	0
FBgn0034564	0	0	0	0	0	0	0	0	0
FBgn0040653	0	0	0	0	0	0	0	0	0
FBgn0010391	0	0	0	0	0	0	0	0	0
FBgn0010397	0	0	0	0	0	0	0	0	0
FBgn0010395	0	0	0	0	0	0	0	0	0
FBgn0036381	1	0	0	1	0	0	0	0	0
FBgn0010399	0	0	0	0	0	0	0	0	0
FBgn0010398	0	0	0	0	0	0	0	0	0
FBgn0030289	0	0	0	0	0	0	0	0	0
FBgn0036383	0	0	0	0	0	0	0	0	0
FBgn0051313	0	0	0	0	0	0	0	0	0
FBgn0030280	0	0	0	0	0	0	0	0	0
FBgn0000015	0	0	0	0	0	0	0	0	0
FBgn0039509	0	0	0	0	0	0	0	0	0
FBgn0039503	0	0	0	0	0	0	0	0	0
FBgn0039501	0	0	0	0	0	0	0	0	0
FBgn0039505	0	0	0	0	0	0	0	0	0
FBgn0036703	0	0	0	0	0	0	0	0	0
FBgn0032021	0	0	0	0	0	0	0	0	0
FBgn0032022	0	0	0	0	0	0	0	0	0
FBgn0032025	0	0	0	0	0	0	0	0	0
FBgn0032029	0	0	0	0	0	0	0	0	0
FBgn0037038	0	0	0	0	0	0	0	0	0
FBgn0037035	0	0	0	0	0	0	0	0	0
FBgn0037031	0	0	0	0	0	0	0	0	0
FBgn0032285	0	0	0	0	0	0	0	0	0
FBgn0032287	0	0	0	0	0	0	0	0	0
FBgn0032286	0	0	0	0	0	0	0	0	0
FBgn0032281	0	0	0	0	0	0	0	0	0
FBgn0032283	0	0	0	0	0	0	0	0	0
FBgn0032282	0	0	0	0	0	0	0	0	0
FBgn0001301	0	0	0	0	0	0	0	0	0
FBgn0050043	0	0	0	0	0	0	0	0	0
FBgn0050047	0	0	0	0	0	0	0	0	0
FBgn0050046	0	0	0	0	0	0	0	0	0
FBgn0033480	0	0	0	0	0	0	0	0	0
FBgn0033481	0	0	0	0	0	0	0	0	0
FBgn0033483	0	0	0	0	0	0	0	0	0
FBgn0035550	0	0	0	0	0	0	0	0	0
FBgn0035551	0	0	0	0	0	0	0	0	0
FBgn0038874	0	0	0	0	0	0	0	0	0
FBgn0038876	0	0	0	0	0	0	0	0	0
FBgn0035557	0	0	0	0	0	0	0	0	0
FBgn0038879	0	0	0	0	0	0	0	0	0
FBgn0035889	0	0	0	0	0	0	0	0	0
FBgn0038129	0	0	0	0	0	0	0	0	0
FBgn0033736	0	0	0	0	0	0	0	0	0
FBgn0028569	0	0	0	0	0	0	0	0	0
FBgn0028563	0	0	0	0	0	0	0	0	0
FBgn0028562	0	0	0	0	0	0	0	0	0
FBgn0028560	0	0	0	0	0	0	0	0	0
FBgn0035089	0	0	0	0	0	0	0	0	0
FBgn0035082	0	0	0	0	0	0	0	0	0
FBgn0035087	0	0	0	0	0	0	0	0	0
FBgn0035084	0	0	0	0	0	0	0	0	0
FBgn0035776	0	0	0	0	0	0	0	0	0
FBgn0035771	0	0	0	0	0	0	0	0	0
FBgn0035772	0	0	0	0	0	0	0	0	0
FBgn0037730	0	0	0	0	0	0	0	0	0
FBgn0034311	0	0	0	0	0	0	0	0	0
FBgn0003655	0	0	0	0	0	0	0	0	0
FBgn0003651	0	0	0	0	0	0	0	0	0
FBgn0031987	0	0	0	0	0	0	0	0	0
FBgn0052442	0	0	0	0	0	0	0	0	0
FBgn0052560	0	0	0	0	0	0	0	0	0
FBgn0052564	0	0	0	0	0	0	0	0	0
FBgn0028383	0	0	0	0	0	0	0	0	0
FBgn0028381	0	0	0	0	0	0	0	0	0
FBgn0028380	0	0	0	0	0	0	0	0	0
FBgn0028387	0	0	0	0	0	0	0	0	0
FBgn0037574	0	0	0	0	0	0	0	0	0
FBgn0010940	0	0	0	0	0	0	0	0	0
FBgn0029167	0	0	0	0	0	0	0	0	0
[truncated: 3,752 more rows]

## Sheet: Wilczynski_Dataset_S6b
gene	stage4-6	stage7-8	stage9-10	stage11-12	stage13-16
FBgn0014931	0	0	0	0	0
FBgn0027563	0	0	0	0	0
FBgn0027560	0	0	0	0	0
FBgn0027561	0	0	0	0	0
FBgn0027565	0	0	0	0	0
FBgn0027569	0	0	0	0	0
FBgn0033579	0	0	0	0	0
FBgn0085215	0	0	0	0	0
FBgn0036115	0	0	0	0	0
FBgn0033434	0	0	0	0	0
FBgn0033437	0	0	0	0	0
FBgn0033431	0	0	0	0	0
FBgn0010431	0	0	0	0	0
FBgn0033439	0	0	0	0	0
FBgn0015550	0	0	0	0	0
FBgn0040751	0	0	0	0	0
FBgn0038243	0	1	1	0	0
FBgn0051721	0	0	0	0	0
FBgn0036379	0	0	0	1	1
FBgn0033574	0	0	0	0	0
FBgn0036373	0	0	0	0	0
FBgn0036377	0	0	0	0	1
FBgn0051908	0	0	0	0	0
FBgn0005614	0	0	0	0	0
FBgn0005616	0	0	0	0	0
FBgn0005617	0	0	0	0	0
FBgn0005612	0	0	0	1	0
FBgn0025809	0	0	0	0	0
FBgn0035872	0	0	0	0	0
FBgn0028642	0	0	0	0	0
FBgn0028862	0	0	0	0	0
FBgn0028644	0	0	0	0	0
FBgn0028645	0	0	0	0	0
FBgn0028648	0	0	0	0	0
FBgn0025549	0	0	0	0	0
FBgn0032478	0	0	0	0	0
FBgn0032479	0	0	0	0	0
FBgn0032476	0	0	0	0	0
FBgn0032477	0	0	0	0	0
FBgn0039354	0	0	0	0	0
FBgn0032475	0	0	0	0	0
FBgn0039352	0	0	0	0	0
FBgn0032473	0	0	0	0	0
FBgn0039350	0	0	0	0	0
FBgn0003510	0	0	0	0	0
FBgn0003513	0	0	0	0	0
FBgn0003515	0	0	0	0	0
FBgn0003042	0	0	0	0	0
FBgn0003517	0	0	0	0	0
FBgn0035296	0	0	0	0	0
FBgn0035294	0	0	0	0	0
FBgn0035203	0	0	0	0	0
FBgn0052599	0	0	0	0	0
FBgn0035207	0	0	0	0	0
FBgn0039943	0	0	0	0	0
FBgn0039942	0	0	0	0	0
FBgn0039233	0	0	0	1	1
FBgn0035128	0	0	0	0	0
FBgn0038405	0	0	0	0	0
FBgn0035124	0	0	0	0	0
FBgn0038407	0	0	0	0	0
FBgn0038401	0	0	0	0	0
FBgn0039237	0	0	0	0	0
FBgn0004430	0	0	0	0	0
FBgn0031979	0	0	0	0	0
FBgn0031972	0	0	0	0	0
FBgn0034453	0	0	0	0	0
FBgn0031970	0	0	0	0	0
FBgn0031975	0	0	0	0	1
FBgn0034186	0	0	0	0	0
FBgn0038749	0	0	0	0	0
FBgn0034181	0	0	0	0	0
FBgn0034182	0	0	0	0	0
FBgn0038742	0	0	0	0	0
FBgn0038747	0	0	0	0	0
FBgn0038745	0	0	0	0	0
FBgn0036117	0	0	0	0	0
FBgn0030511	0	0	0	0	1
FBgn0063659	0	0	0	0	0
FBgn0036967	0	0	0	0	0
FBgn0019650	0	0	0	0	0
FBgn0036111	0	0	0	0	0
FBgn0031608	0	0	0	0	0
FBgn0034989	0	0	0	0	0
FBgn0010229	0	0	0	0	0
FBgn0031601	0	0	0	0	0
FBgn0010225	0	0	0	0	1
FBgn0040102	0	0	0	0	0
FBgn0031606	0	0	0	0	0
FBgn0010220	0	0	0	0	0
FBgn0051739	0	0	0	0	0
FBgn0051221	0	0	0	1	0
FBgn0026578	0	0	0	0	0
FBgn0051223	0	0	0	0	0
FBgn0037181	0	0	0	0	0
FBgn0037180	0	0	0	0	0
FBgn0037185	0	0	0	0	0
FBgn0026573	0	0	0	0	0
FBgn0026570	0	0	0	0	0
FBgn0000346	0	0	0	0	0
FBgn0039433	0	0	0	0	0
FBgn0039430	0	0	0	0	0
FBgn0039437	0	0	0	0	0
FBgn0039436	0	0	0	0	0
FBgn0039435	0	0	0	0	0
FBgn0039434	0	0	0	0	0
FBgn0032111	0	0	0	0	0
FBgn0032114	0	0	0	0	0
FBgn0032116	0	0	0	0	0
FBgn0037767	0	0	0	0	0
FBgn0037766	0	0	0	0	0
FBgn0037760	0	0	0	0	0
FBgn0037763	0	0	0	0	0
FBgn0032803	0	0	0	0	0
FBgn0032801	0	0	0	0	0
FBgn0032800	0	0	0	0	0
FBgn0050172	0	0	0	0	0
FBgn0020508	0	0	0	0	0
FBgn0020506	0	0	0	0	0
FBgn0020503	0	0	0	0	0
FBgn0024558	0	0	0	0	0
FBgn0032870	0	0	0	0	0
FBgn0035461	0	0	0	0	0
FBgn0035462	0	0	0	0	0
FBgn0020642	0	0	0	0	0
FBgn0032876	0	0	0	0	0
FBgn0030460	0	0	0	0	0
FBgn0033602	0	0	0	0	0
FBgn0033607	0	0	0	0	0
FBgn0033604	0	0	0	0	0
FBgn0028418	0	0	0	0	0
FBgn0024889	0	0	0	0	0
FBgn0024330	0	0	0	0	0
FBgn0003720	0	0	0	0	0
FBgn0030607	0	0	0	0	0
FBgn0030606	0	0	0	0	0
FBgn0052102	0	0	0	0	0
FBgn0052105	0	0	1	1	0
FBgn0025681	0	0	0	0	0
FBgn0025680	0	0	0	0	0
FBgn0025683	0	0	0	0	0
FBgn0025686	0	0	0	1	1
FBgn0043472	0	0	0	0	0
FBgn0043470	0	0	0	0	0
FBgn0040877	0	0	0	0	0
FBgn0003187	0	0	0	0	0
FBgn0037978	0	0	0	0	0
FBgn0037974	0	0	0	0	0
FBgn0037975	0	0	0	0	0
FBgn0037976	0	0	0	0	0
FBgn0037977	0	0	0	0	1
FBgn0000578	0	0	0	0	0
FBgn0000577	1	1	1	1	0
FBgn0037445	0	0	0	0	0
FBgn0031453	0	0	0	0	0
FBgn0039600	0	0	0	0	0
FBgn0039601	0	0	0	0	0
FBgn0038835	0	0	0	1	0
FBgn0030724	0	0	0	0	0
FBgn0030720	0	0	0	0	0
FBgn0030721	0	0	0	0	0
FBgn0030723	0	0	0	0	0
FBgn0029901	0	0	0	0	0
FBgn0029906	0	0	0	0	0
FBgn0029905	0	0	0	0	0
FBgn0029909	0	0	0	0	0
FBgn0051032	0	0	0	0	0
FBgn0051036	0	0	0	0	0
FBgn0051038	0	0	0	1	0
FBgn0050342	0	0	0	0	0
FBgn0050344	0	0	0	0	0
FBgn0027504	0	0	0	0	0
FBgn0027506	0	0	0	0	0
FBgn0027507	0	0	0	0	0
FBgn0027500	0	0	0	0	0
FBgn0027501	0	0	0	0	0
FBgn0027503	0	0	0	0	0
FBgn0019936	0	0	0	0	0
FBgn0052843	0	0	0	0	0
FBgn0037518	0	0	0	0	0
FBgn0030239	0	0	0	0	0
FBgn0037513	0	0	0	0	0
FBgn0037517	0	0	0	0	0
FBgn0030234	0	0	0	0	0
FBgn0030235	0	0	0	0	0
FBgn0085232	0	0	0	0	0
FBgn0024912	0	0	0	0	0
FBgn0085237	0	0	0	0	0
FBgn0033457	0	0	0	0	0
FBgn0036173	0	0	0	0	0
FBgn0033452	0	0	0	0	0
FBgn0033451	0	0	0	0	0
FBgn0036170	0	0	0	0	0
FBgn0038269	0	0	0	0	0
FBgn0040730	0	0	0	0	0
FBgn0051698	0	0	0	0	0
FBgn0040732	0	0	0	0	0
FBgn0038261	0	0	0	0	0
FBgn0051694	0	0	0	0	0
FBgn0051693	0	0	0	0	0
FBgn0038266	0	0	0	0	0
FBgn0035020	0	0	0	0	0
FBgn0005585	0	0	0	0	0
FBgn0036391	0	0	0	0	0
FBgn0036390	0	0	0	0	0
FBgn0036396	0	0	0	0	0
FBgn0036395	0	0	0	0	0
FBgn0036394	0	0	0	0	0
FBgn0036398	0	0	0	0	0
FBgn0030215	0	0	0	0	0
FBgn0035027	0	0	0	0	0
FBgn0051961	0	0	0	0	0
FBgn0022774	0	0	0	0	0
FBgn0023507	0	0	0	0	0
FBgn0023508	0	0	0	0	0
FBgn0023509	0	0	0	0	0
FBgn0035851	0	0	0	0	0
FBgn0035853	0	0	0	0	0
FBgn0035852	0	0	0	0	0
FBgn0035855	0	0	0	0	0
FBgn0035857	0	0	0	0	0
FBgn0035856	0	0	0	0	0
FBgn0035859	0	0	0	0	0
FBgn0028622	0	0	0	0	0
FBgn0032493	0	0	0	0	0
FBgn0032494	0	0	0	0	0
FBgn0032495	0	0	0	0	0
FBgn0053196	0	0	0	0	0
FBgn0053191	0	0	0	0	0
FBgn0053193	0	0	0	0	0
FBgn0005638	0	0	0	0	0
FBgn0005639	0	0	0	0	0
FBgn0052827	0	0	0	0	0
FBgn0005632	0	0	0	0	0
FBgn0005633	0	0	0	0	0
FBgn0005630	0	0	0	0	0
FBgn0031437	0	0	0	0	0
FBgn0003065	0	0	0	0	0
FBgn0003067	0	0	0	0	0
FBgn0028336	0	0	0	0	0
FBgn0029573	0	0	0	0	0
FBgn0022073	0	0	0	0	0
FBgn0028646	0	0	0	0	0
FBgn0020369	0	0	0	0	0
FBgn0035146	0	0	0	0	0
FBgn0035145	0	0	0	0	0
FBgn0035144	0	0	0	1	1
FBgn0035141	0	0	0	0	0
FBgn0038460	0	0	0	0	0
FBgn0020367	0	0	0	0	0
FBgn0035148	0	0	0	0	0
FBgn0031918	0	0	0	0	0
FBgn0034439	0	0	0	0	0
FBgn0031914	0	0	0	0	0
FBgn0034436	0	0	0	0	0
FBgn0031910	0	0	0	0	0
FBgn0031913	0	0	0	0	0
FBgn0036704	0	0	0	0	0
FBgn0038720	0	0	0	0	0
FBgn0038721	0	0	0	0	0
FBgn0038722	0	0	0	0	0
FBgn0038723	0	0	0	0	0
FBgn0030537	0	0	0	0	0
FBgn0030536	0	0	0	0	0
FBgn0030539	0	0	0	0	0
FBgn0036947	0	0	0	0	0
FBgn0037172	0	0	0	0	0
FBgn0036945	0	0	0	0	0
FBgn0036942	0	0	0	0	0
FBgn0036943	0	0	0	0	0
FBgn0036941	0	0	0	0	0
FBgn0063670	0	0	0	0	0
FBgn0031622	0	0	0	0	0
FBgn0031623	0	0	0	0	0
FBgn0031620	0	0	0	0	0
FBgn0031621	0	0	0	0	0
FBgn0015324	0	0	0	0	0
FBgn0039359	0	0	0	0	0
FBgn0038095	0	0	0	0	0
FBgn0002856	0	0	0	0	0
FBgn0038098	0	0	0	0	0
FBgn0038099	0	0	0	0	0
FBgn0039355	0	0	0	0	0
FBgn0032472	0	0	0	0	0
FBgn0034133	0	0	0	0	0
FBgn0031320	0	0	0	0	0
FBgn0034135	0	0	0	0	0
FBgn0031326	0	0	0	0	0
FBgn0040385	0	0	0	0	0
FBgn0040387	0	0	0	0	0
FBgn0034137	0	0	0	0	1
FBgn0040383	0	0	0	0	1
FBgn0051209	0	0	0	0	0
FBgn0051207	0	0	0	0	0
FBgn0051757	0	0	0	0	0
FBgn0040388	0	0	0	0	0
FBgn0051200	0	0	0	0	0
FBgn0037163	0	0	0	0	0
FBgn0026592	0	0	0	0	0
FBgn0026593	0	0	0	0	0
FBgn0037167	0	0	0	0	0
FBgn0037166	0	0	0	0	0
FBgn0037165	0	0	0	0	0
FBgn0037164	0	0	0	0	0
FBgn0030394	0	0	0	0	0
FBgn0037169	0	0	0	0	0
FBgn0025864	0	0	0	0	0
FBgn0000320	0	0	1	1	1
FBgn0016983	0	0	0	0	0
FBgn0016984	0	0	0	0	0
FBgn0033842	0	0	0	0	0
FBgn0039419	0	0	0	0	0
FBgn0039417	0	0	0	0	0
FBgn0037705	0	0	0	0	0
FBgn0030494	0	0	0	0	0
FBgn0037447	0	0	0	0	1
FBgn0031143	0	0	0	0	0
FBgn0034313	0	0	0	0	0
FBgn0004510	0	0	0	0	0
FBgn0004512	1	1	0	0	0
FBgn0004513	0	0	0	0	0
FBgn0004047	0	0	0	0	0
FBgn0004516	0	0	0	0	0
FBgn0004045	0	0	0	0	0
FBgn0034643	0	0	0	0	0
FBgn0015247	0	0	0	0	0
FBgn0050403	0	0	0	0	0
FBgn0050158	0	0	0	0	0
FBgn0050404	0	0	0	0	0
FBgn0050151	0	0	0	0	0
FBgn0003896	0	0	0	0	0
FBgn0035448	0	0	0	0	0
FBgn0035445	0	0	0	0	0
FBgn0020626	0	0	0	0	0
FBgn0020620	0	0	0	0	0
FBgn0020622	0	0	0	0	0
FBgn0020623	0	0	0	0	0
FBgn0033664	0	0	0	0	0
FBgn0033665	0	0	0	0	0
FBgn0033667	0	0	0	0	0
FBgn0033668	0	0	0	0	0
FBgn0033669	0	0	0	0	0
FBgn0003046	0	0	0	0	0
FBgn0032394	0	0	0	0	0
FBgn0032391	0	0	0	0	0
FBgn0032390	0	0	0	0	0
FBgn0035626	0	0	0	1	1
FBgn0035627	0	0	0	0	0
FBgn0035624	0	0	0	0	0
FBgn0035625	0	0	0	0	0
FBgn0035622	0	0	0	0	0
FBgn0035623	0	0	0	0	0
FBgn0035620	0	0	0	0	0
FBgn0035621	0	0	0	0	0
FBgn0013725	0	0	0	0	0
FBgn0052121	0	0	0	0	1
FBgn0028292	0	0	0	0	0
FBgn0039259	0	0	0	0	0
FBgn0032538	0	0	0	0	0
FBgn0001308	0	0	0	0	0
FBgn0039251	0	0	0	0	0
FBgn0039250	0	0	0	0	0
FBgn0039254	0	0	0	0	0
FBgn0029743	0	0	0	0	0
FBgn0029749	0	0	0	0	0
FBgn0037954	0	0	0	0	0
FBgn0037955	0	0	0	0	0
FBgn0037958	0	0	0	0	0
FBgn0003308	1	1	1	0	0
FBgn0039629	0	0	0	0	0
FBgn0003300	1	0	0	0	0
FBgn0003302	0	0	0	0	0
FBgn0039626	0	0	0	0	0
FBgn0039625	0	0	0	0	0
FBgn0016641	0	0	0	0	0
FBgn0034498	0	0	0	0	0
FBgn0029969	0	0	0	0	0
FBgn0027526	0	0	0	0	0
FBgn0027527	0	0	0	0	0
FBgn0027524	0	0	0	0	0
FBgn0027525	0	0	0	0	0
FBgn0027522	0	0	0	0	0
FBgn0085308	0	0	0	0	0
FBgn0027521	0	0	0	0	0
FBgn0034379	0	0	0	0	0
FBgn0034378	0	0	0	0	0
FBgn0034372	0	0	0	0	0
FBgn0034371	0	0	0	0	0
FBgn0034374	0	0	0	0	0
FBgn0030258	0	0	0	0	0
FBgn0030259	0	0	0	0	0
FBgn0030706	0	0	0	0	0
FBgn0037575	0	0	0	0	0
FBgn0030704	0	0	0	0	0
FBgn0030257	0	0	0	0	0
FBgn0037571	0	0	0	0	0
FBgn0037572	0	0	0	0	0
FBgn0030701	0	0	0	0	0
FBgn0036622	0	0	0	0	0
FBgn0036152	0	0	0	0	0
FBgn0033475	0	0	0	0	0
FBgn0033474	0	0	0	0	0
FBgn0033477	0	0	0	0	0
FBgn0033476	0	0	0	0	0
FBgn0036159	0	0	0	0	0
FBgn0085259	0	0	0	0	0
FBgn0015040	0	0	0	0	0
FBgn0038281	0	0	0	0	0
FBgn0026438	0	0	0	0	0
FBgn0026433	0	0	0	0	0
FBgn0026432	0	0	0	0	0
FBgn0038289	0	0	1	1	0
FBgn0026430	0	0	0	0	0
FBgn0004210	0	0	0	0	0
FBgn0050362	0	0	0	0	0
FBgn0021800	0	0	0	0	0
FBgn0051413	0	0	0	0	0
FBgn0051411	0	0	0	0	0
FBgn0037392	0	0	0	0	0
FBgn0030873	0	0	0	0	0
FBgn0030874	0	0	0	0	0
FBgn0037396	0	0	0	0	0
FBgn0030877	0	0	0	0	0
FBgn0050090	0	0	0	0	0
FBgn0032700	0	0	0	0	0
FBgn0023528	0	0	0	0	0
FBgn0032703	0	0	0	0	0
FBgn0032705	0	0	0	0	0
FBgn0023522	0	0	0	0	0
FBgn0023521	0	0	0	0	0
FBgn0023526	0	0	0	0	0
FBgn0023527	0	0	0	0	0
FBgn0023525	0	0	0	0	0
FBgn0035886	0	0	0	0	0
FBgn0035121	0	0	0	0	0
FBgn0039391	0	0	0	0	0
FBgn0032601	0	0	0	0	0
FBgn0001263	0	0	0	0	0
FBgn0039870	0	0	0	0	0
FBgn0052806	0	0	0	0	0
FBgn0024273	0	0	0	0	0
FBgn0033734	0	0	0	0	0
FBgn0033360	0	0	0	0	0
FBgn0029003	0	0	0	1	1
FBgn0029004	0	0	0	0	0
FBgn0035169	0	0	0	0	0
FBgn0035160	0	0	0	0	0
FBgn0038443	0	0	0	0	0
FBgn0035165	0	0	0	0	0
FBgn0038916	0	0	0	0	0
FBgn0035167	0	0	0	0	0
FBgn0038914	0	0	0	0	0
FBgn0020381	0	0	0	0	0
FBgn0020386	0	0	0	0	0
FBgn0020389	0	0	0	0	0
FBgn0033368	0	0	0	0	0
FBgn0034416	0	0	0	0	0
FBgn0031937	0	0	0	0	0
FBgn0034142	0	0	0	0	0
FBgn0031423	0	0	0	0	0
FBgn0034144	0	0	0	0	0
FBgn0031397	0	0	0	0	0
FBgn0031930	0	0	0	0	0
FBgn0034411	0	0	0	0	0
FBgn0031428	0	0	0	0	0
FBgn0031398	0	0	0	0	0
FBgn0031399	0	0	0	0	0
FBgn0034418	0	0	0	0	0
FBgn0031939	0	0	0	0	0
FBgn0038700	0	0	0	0	0
FBgn0038701	0	0	0	0	0
FBgn0038708	0	0	0	0	0
FBgn0038709	0	0	0	0	0
FBgn0052373	0	0	0	0	0
FBgn0052372	1	1	1	1	1
FBgn0034187	0	0	0	0	0
FBgn0010825	0	0	0	0	0
FBgn0024289	0	0	0	0	0
FBgn0031644	0	0	0	0	0
FBgn0010774	0	0	0	0	0
FBgn0031646	0	0	0	0	0
FBgn0047199	0	0	0	0	0
FBgn0051778	0	0	0	0	0
FBgn0000659	0	0	0	0	0
FBgn0000658	1	0	0	0	0
FBgn0037492	0	0	0	0	0
FBgn0037491	0	0	0	0	0
FBgn0025807	0	0	0	0	0
FBgn0025806	0	0	0	0	0
FBgn0000303	0	0	0	0	0
FBgn0025803	0	0	0	0	0
FBgn0011283	0	0	0	0	0
FBgn0011280	0	0	0	0	0
FBgn0033869	0	0	0	0	0
FBgn0011286	0	0	0	0	1
FBgn0033860	0	0	0	0	0
FBgn0011289	0	0	0	0	0
FBgn0033867	0	0	0	0	0
FBgn0033865	0	0	0	0	0
FBgn0039476	0	0	0	0	0
FBgn0039475	0	0	0	0	0
FBgn0039474	0	0	0	0	0
FBgn0039473	0	0	0	0	0
FBgn0039471	0	0	0	0	0
FBgn0039470	0	0	0	0	0
FBgn0039478	0	0	0	0	0
FBgn0037721	0	0	0	0	0
FBgn0037720	0	0	0	0	0
FBgn0037723	0	0	0	0	0
FBgn0037722	0	0	0	0	0
FBgn0037727	0	0	0	0	0
FBgn0030114	0	0	0	0	0
FBgn0010488	0	0	0	0	0
FBgn0004028	0	0	0	0	1
FBgn0050420	0	0	0	0	0
FBgn0020545	0	0	0	0	0
FBgn0033397	0	0	0	0	0
FBgn0033391	0	0	0	0	0
FBgn0033392	0	0	0	0	0
FBgn0024515	0	0	0	1	0
FBgn0035428	0	0	0	0	0
FBgn0035429	0	0	0	0	0
FBgn0024510	0	0	0	0	0
FBgn0035425	0	0	0	0	0
FBgn0035420	0	0	0	0	0
FBgn0035423	0	0	0	0	0
FBgn0033138	0	0	0	0	0
FBgn0036450	0	0	0	0	0
FBgn0033132	0	0	0	0	0
FBgn0033645	0	0	0	0	1
FBgn0033134	0	0	0	0	1
FBgn0033135	0	0	0	0	0
FBgn0036456	0	0	0	0	0
FBgn0010228	0	0	0	0	0
FBgn0040507	0	0	0	0	0
FBgn0039897	0	0	0	0	1
FBgn0035397	0	0	0	0	0
FBgn0005778	0	0	0	0	0
FBgn0035392	0	0	0	0	0
FBgn0034232	0	0	0	0	0
FBgn0005771	0	0	1	1	1
FBgn0035399	0	0	0	0	0
FBgn0034230	0	0	0	0	0
FBgn0034231	0	0	0	0	0
FBgn0032899	0	0	0	0	1
FBgn0051875	0	0	0	0	0
FBgn0025394	0	0	0	0	0
FBgn0025643	0	0	0	0	0
FBgn0027779	0	0	0	0	0
FBgn0029768	0	0	0	0	0
FBgn0029769	0	0	0	0	0
FBgn0032518	0	0	0	0	0
FBgn0029763	0	0	0	0	0
FBgn0039277	0	0	0	0	0
FBgn0029761	0	0	0	0	0
FBgn0039270	0	0	0	0	0
FBgn0039272	0	0	0	0	0
FBgn0037934	0	0	0	0	0
FBgn0037936	0	0	0	0	0
FBgn0037937	0	0	0	0	0
FBgn0037930	0	0	0	0	0
FBgn0037933	0	0	0	0	0
FBgn0037938	0	0	0	0	0
FBgn0037939	0	0	0	0	0
FBgn0000533	0	0	0	0	0
FBgn0000826	0	0	0	0	0
FBgn0039647	0	0	0	0	0
FBgn0039640	0	0	0	0	0
FBgn0031091	0	0	0	0	0
FBgn0031090	0	0	0	0	0
FBgn0031093	0	0	0	0	0
FBgn0031092	0	0	0	0	0
FBgn0031094	0	0	0	0	0
FBgn0031097	0	0	0	0	0
FBgn0031099	0	0	0	0	0
FBgn0031098	0	0	0	0	0
FBgn0011361	0	0	0	0	0
FBgn0029947	0	0	0	0	0
FBgn0029944	0	0	0	0	0
FBgn0029943	0	0	0	0	0
FBgn0029940	0	0	0	0	0
FBgn0029941	0	0	0	0	0
FBgn0040889	0	0	0	1	1
FBgn0027095	0	0	0	0	0
FBgn0027091	0	0	0	0	0
FBgn0034602	0	0	0	0	0
FBgn0034601	0	0	0	0	0
FBgn0034606	0	0	0	0	0
FBgn0015288	0	0	0	0	0
FBgn0040089	0	0	1	1	1
FBgn0015286	0	0	0	0	0
FBgn0015287	0	0	0	0	0
FBgn0034357	0	0	0	0	0
FBgn0034356	0	0	0	0	0
FBgn0015282	0	0	0	0	0
FBgn0015283	0	0	0	0	1
FBgn0034352	0	0	0	0	0
FBgn0038113	0	0	0	0	0
FBgn0038110	0	0	0	0	0
FBgn0038114	0	0	0	0	0
FBgn0038118	0	0	0	0	0
FBgn0030276	0	0	0	0	0
FBgn0030277	0	0	0	0	0
FBgn0030274	0	0	0	0	0
FBgn0030275	0	0	0	0	0
FBgn0030272	0	0	0	0	0
FBgn0037550	0	0	0	0	0
FBgn0037551	0	0	0	0	0
FBgn0047272	0	0	0	0	0
FBgn0037559	0	0	0	0	0
FBgn0036606	0	0	0	0	0
FBgn0036600	0	0	0	0	0
FBgn0040260	0	0	0	0	1
FBgn0010014	0	0	0	0	0
FBgn0010015	0	0	0	0	0
FBgn0010019	0	0	0	0	0
FBgn0010548	0	0	0	0	0
FBgn0023179	0	0	0	0	0
FBgn0023178	0	0	0	0	0
FBgn0023175	0	0	0	0	0
FBgn0026417	0	0	0	0	0
FBgn0023170	0	0	0	0	0
FBgn0021825	0	0	0	0	0
FBgn0026576	0	0	0	0	0
FBgn0026577	0	0	0	0	0
FBgn0051431	0	0	0	0	0
FBgn0030852	0	0	0	0	0
FBgn0030850	0	0	0	0	0
FBgn0037182	0	0	0	0	0
FBgn0030859	0	0	0	0	0
FBgn0085276	0	0	0	0	0
FBgn0026571	0	0	0	0	0
FBgn0085273	0	0	0	0	0
FBgn0032726	0	0	0	0	0
FBgn0032727	0	0	0	0	0
FBgn0032725	0	0	0	0	0
FBgn0061403	0	0	0	0	0
FBgn0023545	0	0	0	0	0
FBgn0001205	0	0	0	0	0
FBgn0001204	0	0	0	0	0
FBgn0001203	0	0	0	0	0
FBgn0001202	0	0	0	0	0
FBgn0053156	0	0	0	0	0
FBgn0053157	0	0	0	0	0
FBgn0001208	0	0	0	0	0
FBgn0042135	0	0	0	0	0
FBgn0042641	0	0	0	0	0
FBgn0042138	0	0	0	0	0
FBgn0035989	0	0	0	0	0
FBgn0035983	0	0	0	0	0
FBgn0024251	0	0	0	0	0
FBgn0035986	0	0	0	0	0
FBgn0035985	0	0	0	0	0
FBgn0024252	0	0	0	0	0
FBgn0020018	0	0	0	0	0
FBgn0028374	0	0	0	0	0
FBgn0028373	0	0	0	0	0
FBgn0028370	0	0	0	0	0
FBgn0028371	0	0	0	0	0
FBgn0028379	0	0	0	0	0
FBgn0022701	0	0	0	0	0
FBgn0029531	0	0	0	0	0
FBgn0022702	0	0	0	0	0
FBgn0039229	0	0	0	0	0
FBgn0022709	0	0	0	0	0
FBgn0029539	0	0	0	0	0
FBgn0035181	0	0	0	0	0
FBgn0035187	0	0	0	0	0
FBgn0038938	0	0	0	0	0
FBgn0039227	0	0	0	0	0
FBgn0035189	0	0	0	0	0
FBgn0038932	0	0	0	0	0
FBgn0052687	0	0	0	0	0
FBgn0019809	0	0	0	0	0
FBgn0031702	0	0	0	0	0
FBgn0036106	0	0	0	0	0
FBgn0036988	0	0	0	0	0
FBgn0036104	0	0	0	0	0
FBgn0052423	0	0	0	0	0
FBgn0052350	0	0	0	0	0
FBgn0036980	0	0	0	0	0
FBgn0052355	0	0	0	0	1
FBgn0036987	0	0	0	0	0
FBgn0036984	0	0	0	0	0
FBgn0028952	0	0	0	0	0
FBgn0028953	0	0	0	0	0
FBgn0028956	0	0	0	0	0
FBgn0019940	0	0	0	0	0
FBgn0019949	0	0	0	0	0
FBgn0019948	0	0	0	0	0
FBgn0000229	0	0	0	0	0
FBgn0000492	0	1	1	1	1
FBgn0039180	0	0	0	0	0
FBgn0034162	0	0	0	0	0
FBgn0031406	0	0	0	0	0
FBgn0031407	0	0	0	0	0
FBgn0039189	0	0	0	0	0
FBgn0039188	0	0	0	0	0
FBgn0037128	0	0	0	0	0
FBgn0037126	0	0	0	0	0
FBgn0037124	0	0	0	0	0
FBgn0037123	0	0	0	0	0
FBgn0037122	0	0	0	0	0
FBgn0037121	0	0	0	0	0
FBgn0025821	0	0	0	0	0
FBgn0025820	0	0	0	0	0
FBgn0025825	0	0	0	0	0
FBgn0025827	0	0	0	0	0
FBgn0039459	0	0	0	0	0
FBgn0039451	0	0	0	0	0
FBgn0039453	0	0	0	0	0
FBgn0033800	0	0	0	0	0
FBgn0033802	0	0	0	0	0
FBgn0034299	0	0	0	0	0
FBgn0034294	0	0	0	0	0
FBgn0034295	0	0	0	0	0
FBgn0034296	0	0	0	0	0
FBgn0034290	0	0	0	0	0
FBgn0034291	0	0	0	0	0
FBgn0031661	0	0	0	0	0
FBgn0014010	0	0	0	0	0
FBgn0030130	0	0	0	0	0
FBgn0038256	0	0	0	0	0
FBgn0038257	0	0	0	0	0
FBgn0050445	0	0	0	0	0
FBgn0050443	0	0	0	0	0
FBgn0050442	0	0	0	0	0
FBgn0050440	0	0	0	0	0
FBgn0036299	0	0	0	0	0
FBgn0036294	0	0	0	0	1
FBgn0036295	0	0	0	0	0
FBgn0036292	0	0	0	0	0
FBgn0036291	0	0	0	0	0
FBgn0034838	0	0	0	0	0
FBgn0034833	0	0	0	0	0
FBgn0034835	0	0	0	0	0
FBgn0038321	0	0	0	0	0
FBgn0038323	0	0	0	0	0
FBgn0038324	0	0	0	0	0
FBgn0038325	0	0	0	0	0
FBgn0038327	0	0	0	0	0
FBgn0035407	0	0	0	0	0
FBgn0035405	0	0	0	0	0
FBgn0035400	0	0	0	0	0
FBgn0035401	0	0	0	0	0
FBgn0036470	0	0	0	0	0
FBgn0036476	0	0	0	0	0
FBgn0033117	0	0	0	0	0
FBgn0033115	0	0	0	0	0
FBgn0036478	0	0	0	0	0
FBgn0036479	0	0	0	0	0
FBgn0052649	0	0	0	0	0
FBgn0005590	0	0	0	0	0
FBgn0040521	0	0	0	0	0
FBgn0004009	1	0	0	1	1
FBgn0001075	0	0	0	0	0
FBgn0004556	0	0	0	0	0
FBgn0002522	0	0	0	0	0
FBgn0002521	0	0	0	0	0
FBgn0002526	0	0	1	1	0
FBgn0002525	0	0	0	0	0
FBgn0002524	0	0	0	0	0
FBgn0013764	0	0	0	0	0
FBgn0052160	0	0	0	0	0
FBgn0025628	0	0	0	0	0
FBgn0025627	0	0	0	0	0
FBgn0025626	0	0	0	0	0
FBgn0025625	0	0	0	0	0
FBgn0025624	0	0	0	0	0
FBgn0025623	0	0	0	0	0
FBgn0052168	0	0	0	0	0
FBgn0025620	0	0	0	0	1
FBgn0035753	0	0	0	0	0
FBgn0039217	0	0	0	0	0
FBgn0029708	0	0	0	0	0
FBgn0029709	0	0	0	0	0
FBgn0039211	0	0	0	0	0
FBgn0039210	0	0	0	0	0
FBgn0029704	0	0	0	0	0
FBgn0029705	0	0	0	0	0
FBgn0029702	0	0	0	0	0
FBgn0029703	0	0	0	0	0
FBgn0008649	0	0	0	0	1
FBgn0037918	0	0	0	0	0
FBgn0037917	0	0	0	0	0
FBgn0037915	0	0	0	0	0
FBgn0062512	0	0	0	0	0
FBgn0062517	0	0	0	0	0
FBgn0027654	0	0	0	0	0
FBgn0051090	0	0	0	0	0
FBgn0039666	0	0	0	0	0
FBgn0039667	0	0	0	0	1
FBgn0003346	0	0	0	0	0
FBgn0039665	0	0	0	0	0
FBgn0003870	0	0	0	0	0
FBgn0003349	0	0	0	0	0
FBgn0024939	0	0	0	0	0
FBgn0051549	0	0	0	0	0
FBgn0020224	0	0	0	0	0
FBgn0031872	0	0	0	0	0
FBgn0031871	0	0	0	0	0
FBgn0031876	0	0	0	0	0
FBgn0031874	0	0	0	0	0
FBgn0031878	0	0	0	0	0
FBgn0028918	0	0	0	0	0
FBgn0028919	0	0	0	0	0
FBgn0040060	0	0	0	0	0
FBgn0040061	0	0	0	0	0
FBgn0034627	0	0	0	0	0
FBgn0034626	0	0	0	0	0
FBgn0040064	0	0	0	0	0
FBgn0040069	0	0	0	0	0
FBgn0034629	0	0	0	0	0
FBgn0038134	1	1	0	0	0
FBgn0038130	0	0	0	0	0
FBgn0038132	0	0	0	0	0
FBgn0051632	0	0	0	0	0
FBgn0040206	0	0	0	0	0
FBgn0040207	0	0	0	0	0
FBgn0010520	0	0	0	0	0
FBgn0015001	0	0	0	0	0
FBgn0051635	0	0	0	0	0
FBgn0051634	0	0	0	0	0
FBgn0040208	0	0	0	0	0
FBgn0051182	0	0	0	0	0
FBgn0038574	0	0	0	0	0
FBgn0038576	0	0	0	0	0
FBgn0021847	0	0	0	0	0
FBgn0021953	0	0	0	0	0
FBgn0051457	0	0	0	0	0
FBgn0051453	0	0	0	0	0
FBgn0051451	0	0	0	0	0
FBgn0035469	0	0	0	0	0
FBgn0051989	0	0	0	0	0
FBgn0051988	0	0	0	0	0
FBgn0000119	0	0	0	0	0
FBgn0030836	0	0	0	0	0
FBgn0020641	0	0	0	0	0
FBgn0030830	0	0	0	0	0
FBgn0030833	0	0	0	0	0
FBgn0010387	0	0	0	0	0
FBgn0030838	0	0	0	0	0
FBgn0000117	0	0	0	0	0
FBgn0010388	0	0	0	0	0
FBgn0085293	0	0	0	0	0
FBgn0085296	0	0	0	0	0
FBgn0010389	0	0	0	1	1
FBgn0036665	0	0	0	0	0
FBgn0036662	0	0	0	0	0
FBgn0036661	0	0	0	0	0
FBgn0036660	0	0	0	0	0
FBgn0032744	0	0	0	0	0
FBgn0032741	0	0	0	0	0
FBgn0032966	0	0	0	0	0
FBgn0032967	0	0	0	0	0
FBgn0001197	0	0	0	0	0
FBgn0005563	0	0	0	0	0
FBgn0005564	0	0	0	0	1
FBgn0003975	0	0	0	0	0
FBgn0003970	0	0	0	0	0
FBgn0013954	0	0	0	0	0
FBgn0013953	0	0	0	0	0
FBgn0001229	0	0	0	0	0
FBgn0053178	0	0	0	0	0
FBgn0004618	0	0	0	0	0
FBgn0001222	0	0	0	0	0
FBgn0001225	0	0	0	0	0
FBgn0053174	0	0	0	0	0
FBgn0001226	0	0	0	0	0
FBgn0033569	0	0	0	0	0
FBgn0005694	0	0	0	0	0
FBgn0033566	0	0	0	0	0
FBgn0035211	0	0	0	0	0
FBgn0035210	0	0	0	0	0
FBgn0024230	0	0	0	0	0
FBgn0024728	0	0	0	0	0
FBgn0039373	0	0	0	0	0
FBgn0038957	0	0	0	0	0
FBgn0038484	0	0	0	0	0
FBgn0038487	0	0	0	0	0
FBgn0038486	0	0	0	0	0
FBgn0038481	0	0	0	0	0
FBgn0038951	0	0	0	0	0
FBgn0038950	0	0	0	0	0
FBgn0038489	0	0	0	0	0
FBgn0038488	0	0	0	0	0
FBgn0042118	0	0	0	0	0
FBgn0042119	0	0	0	0	0
FBgn0042112	0	0	0	0	0
FBgn0003598	0	0	0	0	0
FBgn0043578	0	0	0	0	0
FBgn0043576	0	0	0	0	0
FBgn0019929	0	0	0	0	0
FBgn0019928	0	0	0	0	0
FBgn0052405	0	0	0	0	0
FBgn0052406	0	0	0	0	0
FBgn0029512	0	0	0	0	0
FBgn0029514	0	0	0	0	0
FBgn0043792	0	0	0	0	0
FBgn0043791	0	0	1	0	1
FBgn0043796	0	0	0	0	0
FBgn0000477	0	0	0	0	0
FBgn0004838	0	0	0	0	0
FBgn0033031	0	0	0	0	0
FBgn0034109	0	0	0	0	0
FBgn0036046	0	0	0	0	0
FBgn0031465	0	0	0	0	0
FBgn0034107	0	0	0	0	0
FBgn0031461	0	0	0	0	0
FBgn0031443	0	0	0	0	0
FBgn0037101	0	0	0	0	0
FBgn0030332	0	0	0	0	0
FBgn0030330	0	0	0	0	0
FBgn0031440	0	0	0	0	0
FBgn0037455	0	0	0	0	0
FBgn0030485	0	0	0	0	0
FBgn0037108	0	0	0	0	0
FBgn0030486	0	0	0	0	0
FBgn0030481	0	0	0	0	0
FBgn0030482	0	0	0	0	0
FBgn0000617	0	0	0	0	0
FBgn0000615	0	0	0	0	0
FBgn0033827	0	0	0	0	0
FBgn0033822	0	0	0	0	1
FBgn0033820	0	0	0	0	0
FBgn0031681	0	0	0	0	0
FBgn0031682	0	0	0	0	0
FBgn0031683	0	0	0	0	0
FBgn0015924	0	0	0	0	0
FBgn0031689	0	0	0	0	0
FBgn0015929	0	0	0	0	0
FBgn0037475	0	0	0	0	0
FBgn0014032	0	0	0	0	0
FBgn0030159	0	0	0	0	0
FBgn0030158	0	0	0	0	0
FBgn0027111	0	0	0	1	0
FBgn0031150	0	0	0	0	0
FBgn0034656	0	0	0	0	0
FBgn0050461	0	0	0	0	0
FBgn0050465	0	0	0	0	0
FBgn0050467	0	0	0	0	0
FBgn0085330	0	0	0	0	0
FBgn0085337	0	0	0	0	0
FBgn0085336	0	0	0	0	0
FBgn0033350	0	0	0	0	0
FBgn0036273	0	0	0	0	0
FBgn0036274	0	0	0	0	0
FBgn0036278	0	0	0	0	0
FBgn0031157	0	0	0	0	0
FBgn0044020	0	0	0	0	0
FBgn0034816	0	0	0	0	0
FBgn0010198	0	0	0	0	0
FBgn0034814	0	0	0	0	0
FBgn0010197	0	0	0	0	0
FBgn0038302	0	0	0	0	0
FBgn0038303	0	0	0	0	0
FBgn0038300	0	0	0	0	0
FBgn0038301	0	0	0	0	0
FBgn0011224	0	0	0	0	0
FBgn0033680	0	0	0	0	0
FBgn0033686	0	0	0	0	0
FBgn0033174	0	0	0	0	0
FBgn0036416	0	0	0	0	0
FBgn0036417	0	0	0	0	0
FBgn0033170	0	0	0	0	0
FBgn0013563	0	0	0	0	0
FBgn0033178	0	0	0	0	0
FBgn0051849	0	0	0	0	0
FBgn0015745	0	0	0	0	0
FBgn0032889	0	0	0	0	0
FBgn0032886	0	0	0	0	0
FBgn0032885	0	0	0	0	0
FBgn0032884	0	0	0	0	0
FBgn0032883	0	0	0	0	0
FBgn0032882	0	0	0	0	0
FBgn0051847	0	0	0	0	0
FBgn0004574	0	0	0	0	0
FBgn0004573	0	0	0	0	0
FBgn0013749	0	0	0	0	0
FBgn0030791	0	0	0	0	0
FBgn0013743	0	0	0	0	0
FBgn0032087	0	0	0	0	0
FBgn0032082	0	0	0	0	0
FBgn0026193	0	0	0	0	0
FBgn0032089	0	0	0	0	0
FBgn0032088	0	0	0	0	0
FBgn0025352	0	0	0	0	0
FBgn0025608	0	0	0	0	0
FBgn0028582	0	0	0	0	0
FBgn0039238	0	0	0	0	0
FBgn0032229	0	0	0	0	0
FBgn0052109	0	0	0	0	0
FBgn0032223	0	0	0	0	0
FBgn0039941	0	0	0	0	0
FBgn0039232	0	0	0	0	0
FBgn0039235	0	0	0	0	0
FBgn0039234	0	0	0	0	0
FBgn0039945	0	0	0	0	0
FBgn0029724	0	0	0	0	0
FBgn0029723	0	0	0	0	0
FBgn0035685	0	0	0	0	0
FBgn0015300	0	0	0	0	0
FBgn0044817	0	0	0	0	0
FBgn0016047	0	0	0	0	0
FBgn0003366	0	0	0	0	0
FBgn0003360	0	0	0	0	0
FBgn0035287	0	0	0	0	0
FBgn0038548	0	0	0	0	0
FBgn0038549	0	0	0	0	0
FBgn0038540	0	0	0	0	0
FBgn0035021	0	0	0	0	0
FBgn0035022	0	0	0	0	0
FBgn0035023	0	0	0	0	0
FBgn0038545	0	0	0	0	0
FBgn0038547	0	0	0	0	0
FBgn0029989	0	0	0	0	0
FBgn0029980	0	0	0	0	0
FBgn0029986	0	0	0	0	0
FBgn0029987	0	0	0	0	0
FBgn0031855	0	0	0	0	0
FBgn0031850	0	1	1	1	1
FBgn0031859	0	0	0	0	0
FBgn0031858	0	0	0	0	0
FBgn0034318	0	0	0	0	0
FBgn0031148	0	0	0	0	0
FBgn0034649	0	0	0	0	0
FBgn0034648	0	0	0	0	0
FBgn0034647	0	0	0	0	0
FBgn0034646	0	0	0	0	0
FBgn0015240	0	0	0	0	0
FBgn0034312	0	0	0	0	0
FBgn0034315	0	0	0	0	0
FBgn0034314	0	0	0	0	0
FBgn0031145	0	0	0	0	0
FBgn0038150	0	0	0	0	0
FBgn0026188	0	0	0	0	0
FBgn0040950	0	0	0	0	0
FBgn0040227	0	0	0	0	0
FBgn0015024	0	0	0	0	0
FBgn0015025	0	0	0	0	0
FBgn0040954	0	0	0	0	0
FBgn0010053	0	0	0	0	0
FBgn0051612	0	0	0	0	0
FBgn0026323	0	0	0	0	0
FBgn0051619	0	0	0	0	0
FBgn0026324	0	0	0	0	0
FBgn0000286	0	0	0	0	0
FBgn0000287	0	0	0	0	0
FBgn0027589	0	0	0	0	0
FBgn0027584	0	0	0	0	0
FBgn0027585	0	0	0	0	0
FBgn0027586	0	0	0	0	0
FBgn0027587	0	0	0	0	0
FBgn0027580	0	0	0	0	0
FBgn0027583	0	0	0	0	0
FBgn0051472	0	0	0	0	0
FBgn0051475	0	0	0	0	0
FBgn0030817	0	0	0	0	0
FBgn0030814	0	0	0	0	0
FBgn0030813	0	0	0	0	0
FBgn0030810	0	0	0	0	0
FBgn0000137	0	0	0	0	0
FBgn0000139	0	0	0	0	0
FBgn0036643	0	0	0	0	0
FBgn0036648	0	0	0	0	0
FBgn0032946	0	0	0	0	0
FBgn0032763	0	0	0	0	0
FBgn0032760	0	0	0	0	0
FBgn0032945	0	0	0	0	0
FBgn0004903	0	0	0	0	0
FBgn0032769	0	0	0	0	0
FBgn0020440	0	0	0	0	0
FBgn0013972	0	0	0	0	0
FBgn0004635	0	0	0	1	1
FBgn0004636	0	0	0	0	0
FBgn0053110	0	0	0	0	0
FBgn0053111	0	0	0	0	0
FBgn0053113	0	0	0	0	0
FBgn0032340	0	0	0	0	0
FBgn0011828	0	0	0	0	0
FBgn0032342	0	0	0	0	0
FBgn0033549	0	0	0	0	0
FBgn0033540	0	0	0	1	1
FBgn0033543	0	0	0	0	0
FBgn0024211	0	0	0	0	0
FBgn0035234	0	0	0	0	0
FBgn0035236	0	0	0	0	0
FBgn0035231	0	0	0	0	0
FBgn0033374	0	0	0	0	0
FBgn0035233	0	0	0	0	0
FBgn0035232	0	0	0	0	0
FBgn0035238	0	0	0	0	0
FBgn0032310	0	0	0	0	1
FBgn0062943	0	0	0	0	0
FBgn0038971	0	0	0	0	0
FBgn0038973	0	0	0	0	0
FBgn0038972	0	0	0	0	0
FBgn0038974	0	0	0	0	0
FBgn0002772	0	0	0	0	1
FBgn0002773	0	0	0	0	1
FBgn0052647	0	0	0	0	0
FBgn0033749	0	0	0	0	0
FBgn0002775	0	0	0	0	0
FBgn0002778	0	0	0	0	0
FBgn0033748	0	0	0	0	0
FBgn0037656	0	0	0	0	0
FBgn0042174	0	0	0	0	0
FBgn0042177	0	0	0	0	0
FBgn0052394	0	0	0	0	0
FBgn0052396	0	0	0	0	0
FBgn0052393	0	0	0	0	0
FBgn0052392	0	0	0	0	0
FBgn0052399	0	0	0	0	0
FBgn0028913	0	0	0	0	0
FBgn0029067	0	0	0	0	0
FBgn0037897	0	0	0	0	0
FBgn0037895	0	0	0	0	0
FBgn0037894	0	0	0	0	0
FBgn0026666	0	0	0	0	0
FBgn0000455	0	0	0	0	0
FBgn0000454	0	0	0	0	0
FBgn0000451	0	0	0	0	0
FBgn0000459	0	0	0	0	0
FBgn0039141	0	0	0	0	0
FBgn0039140	0	0	0	0	0
FBgn0039147	0	0	0	0	0
FBgn0039145	0	0	0	0	0
FBgn0039144	0	0	0	0	0
FBgn0034127	0	0	0	0	0
FBgn0031333	0	0	0	0	0
FBgn0031335	0	0	0	0	0
FBgn0034120	0	0	0	0	0
FBgn0031449	0	0	0	0	0
FBgn0000639	0	0	0	0	0
FBgn0030317	1	0	0	0	0
FBgn0030311	0	0	0	0	0
FBgn0037473	0	0	0	0	0
FBgn0037472	0	0	0	0	0
FBgn0000636	0	0	0	1	1
FBgn0011592	0	0	0	0	0
FBgn0011591	0	0	0	0	0
FBgn0011596	0	0	0	0	0
FBgn0039494	0	0	0	0	0
FBgn0039492	0	0	0	0	0
FBgn0039498	0	0	0	0	0
FBgn0030174	0	0	0	0	0
FBgn0015905	0	0	0	0	0
FBgn0015904	0	0	0	0	0
FBgn0036950	0	0	0	0	0
FBgn0036953	0	0	0	0	0
FBgn0036952	0	0	0	0	0
FBgn0030500	0	0	0	0	0
FBgn0036956	0	0	0	0	0
FBgn0034783	0	0	0	0	0
FBgn0034788	0	0	0	0	0
FBgn0051284	0	0	0	0	0
FBgn0051288	0	0	0	0	0
FBgn0036258	0	0	0	0	0
FBgn0033379	0	0	0	0	0
FBgn0037834	0	0	0	0	0
FBgn0033373	0	0	0	0	0
FBgn0085316	0	0	0	0	0
FBgn0033376	0	0	0	0	0
FBgn0033375	0	0	0	0	0
FBgn0036785	0	0	0	0	0
FBgn0036786	0	0	0	0	0
FBgn0036787	0	0	0	0	0
FBgn0036781	0	0	0	0	0
FBgn0036783	0	0	0	0	0
FBgn0032938	0	0	0	0	0
FBgn0034871	0	0	0	0	0
FBgn0034878	0	0	0	0	0
FBgn0030178	0	0	0	0	0
FBgn0038366	0	0	0	0	0
FBgn0038360	0	0	0	0	0
FBgn0030170	0	0	0	0	0
FBgn0002940	0	0	0	0	0
FBgn0037781	0	0	0	0	0
FBgn0037780	0	0	0	0	0
FBgn0033159	0	0	0	0	0
FBgn0036436	0	0	0	0	0
FBgn0036437	0	0	0	0	0
FBgn0033154	0	0	0	0	0
FBgn0033155	0	0	0	0	0
FBgn0036433	0	0	0	0	0
FBgn0010313	0	0	0	0	0
FBgn0031639	0	0	0	0	0
FBgn0015763	0	0	0	0	0
FBgn0010317	0	0	0	0	0
FBgn0010315	0	0	0	0	0
FBgn0015766	0	0	0	0	0
FBgn0015765	0	0	0	0	0
FBgn0051869	0	0	0	0	0
FBgn0064237	0	0	0	0	0
FBgn0025378	0	0	0	0	0
FBgn0039969	0	0	0	0	0
FBgn0032208	0	0	0	0	0
FBgn0039965	0	0	0	0	0
FBgn0032204	0	0	0	0	0
FBgn0032207	0	0	0	0	0
FBgn0039966	0	0	0	0	0
FBgn0032203	0	0	0	0	0
FBgn0032202	0	0	0	0	0
FBgn0002566	0	0	0	0	0
FBgn0002565	0	0	0	0	0
FBgn0002564	0	0	0	0	0
FBgn0002563	0	0	0	0	0
FBgn0002561	0	0	1	1	0
FBgn0024689	0	0	0	0	0
FBgn0003380	0	0	0	0	0
FBgn0022359	0	0	0	0	0
FBgn0003386	0	0	0	0	0
FBgn0003388	0	0	0	0	0
FBgn0024975	0	0	0	0	0
FBgn0035001	0	0	0	0	0
FBgn0035006	0	0	0	0	0
FBgn0035007	0	0	0	0	0
FBgn0038564	0	0	0	0	0
FBgn0024973	0	0	0	0	0
FBgn0038569	0	0	0	0	0
FBgn0020269	0	0	0	0	1
FBgn0031781	0	0	0	0	0
FBgn0031782	0	0	0	0	0
FBgn0031786	0	0	0	0	0
FBgn0052076	0	0	0	0	0
FBgn0063757	0	0	0	0	0
FBgn0034661	0	0	0	0	0
FBgn0034663	0	0	0	0	0
FBgn0034664	0	0	0	0	0
FBgn0040020	0	0	0	0	0
FBgn0038171	0	0	0	0	0
FBgn0038170	0	0	0	0	0
FBgn0038172	0	0	0	0	0
FBgn0038175	0	0	0	0	0
FBgn0038179	0	0	0	0	0
FBgn0038178	0	1	1	1	0
FBgn0030787	0	0	0	0	0
FBgn0030782	0	0	0	0	0
FBgn0030788	0	0	0	0	0
FBgn0011692	0	0	0	0	0
FBgn0011695	0	0	0	0	0
FBgn0011694	0	0	0	0	0
FBgn0015591	0	0	0	0	0
FBgn0051676	0	0	0	0	1
FBgn0051675	0	0	0	0	0
FBgn0051673	0	0	0	0	0
FBgn0040236	0	0	0	0	0
FBgn0039779	0	0	0	0	0
FBgn0039774	0	0	0	0	0
FBgn0039776	0	0	0	0	1
FBgn0039777	0	0	0	0	0
FBgn0051492	0	0	0	0	0
FBgn0037310	0	0	0	0	0
FBgn0037313	0	0	0	0	0
FBgn0037314	0	0	0	0	0
FBgn0037315	0	0	0	0	0
FBgn0037317	0	0	0	0	0
FBgn0014179	0	0	0	0	0
FBgn0000157	0	0	0	0	0
FBgn0004431	0	0	0	0	0
FBgn0004922	0	0	0	0	0
FBgn0032921	0	0	0	0	0
FBgn0004926	0	0	0	0	0
FBgn0004381	0	0	0	0	0
FBgn0004657	0	0	0	0	0
FBgn0004656	0	0	0	0	0
FBgn0004654	0	0	0	0	0
FBgn0004652	0	0	0	0	0
FBgn0004650	0	0	0	0	0
FBgn0033527	0	0	0	0	0
FBgn0033524	0	0	0	0	0
FBgn0033523	0	0	0	0	0
FBgn0033522	0	0	0	0	0
FBgn0033528	0	0	0	0	0
FBgn0035257	0	0	0	0	0
FBgn0035254	0	0	0	0	0
FBgn0035253	0	0	0	0	0
FBgn0035251	0	0	0	0	0
FBgn0031944	0	0	0	0	0
FBgn0066114	0	0	0	0	0
FBgn0028687	0	0	0	0	0
FBgn0028685	0	0	0	0	0
FBgn0028688	0	0	0	0	0
FBgn0030237	0	0	0	0	0
FBgn0038993	0	0	0	0	0
FBgn0002715	0	0	0	0	0
FBgn0052666	0	0	0	0	0
FBgn0031240	0	0	0	0	0
FBgn0031717	0	0	0	0	0
FBgn0052912	0	0	0	0	0
FBgn0031247	0	0	0	0	0
FBgn0032374	0	0	0	0	0
FBgn0003449	0	0	0	0	0
FBgn0003448	1	1	0	0	0
FBgn0003444	0	0	0	0	0
FBgn0039165	0	0	0	0	0
FBgn0031318	0	0	0	0	0
FBgn0031319	0	0	0	0	0
FBgn0039161	0	0	0	0	0
FBgn0039160	0	0	0	0	0
FBgn0031313	0	0	0	0	1
FBgn0031310	0	0	0	0	0
FBgn0039169	0	0	0	0	0
FBgn0039168	0	0	0	0	0
FBgn0031314	0	0	0	0	0
FBgn0031315	0	0	0	0	0
FBgn0000382	0	0	0	0	0
FBgn0000384	0	0	0	0	0
FBgn0011205	0	0	0	0	0
FBgn0030599	0	0	0	0	0
FBgn0030598	0	0	0	0	0
FBgn0040373	0	0	0	0	0
FBgn0038969	0	0	0	0	0
FBgn0038694	0	0	0	0	0
FBgn0038697	0	0	0	0	0
FBgn0038690	0	0	0	0	0
FBgn0038691	0	0	0	0	0
FBgn0037419	0	0	0	0	0
FBgn0030376	0	0	0	0	0
FBgn0037414	0	0	0	0	0
FBgn0030373	0	0	0	0	0
FBgn0037412	0	0	0	0	0
FBgn0037411	0	0	0	0	0
FBgn0030370	0	0	0	0	0
FBgn0036239	0	0	0	0	0
FBgn0033316	0	0	0	0	0
FBgn0033310	0	0	0	0	0
FBgn0034509	0	0	0	0	0
FBgn0034858	0	0	0	0	0
FBgn0034859	0	0	0	0	0
FBgn0034500	0	0	0	0	0
FBgn0034501	0	0	0	0	0
FBgn0034503	0	0	0	0	0
FBgn0034504	0	0	0	0	0
FBgn0034506	0	0	0	0	0
FBgn0023177	0	0	0	0	0
FBgn0038349	0	0	0	0	0
FBgn0038347	0	0	0	0	0
FBgn0038344	0	0	0	0	0
FBgn0038345	0	0	0	0	0
FBgn0038341	0	0	0	0	0
FBgn0030191	0	0	0	0	0
FBgn0047008	0	0	0	0	0
FBgn0030196	0	0	0	0	0
FBgn0005586	0	0	0	0	0
FBgn0040582	0	0	0	0	0
FBgn0015781	0	0	0	0	0
FBgn0010338	0	0	0	0	0
FBgn0015789	0	0	0	0	0
FBgn0015788	0	0	0	0	0
FBgn0010333	0	0	0	0	0
FBgn0030999	0	0	0	0	0
FBgn0051802	0	0	0	0	0
FBgn0030993	0	0	0	0	0
FBgn0030990	0	0	0	0	0
FBgn0030996	0	0	0	0	0
FBgn0030994	0	0	0	0	0
FBgn0032042	0	0	0	0	0
FBgn0032048	0	0	0	0	0
FBgn0041188	0	0	0	0	0
FBgn0041180	0	0	0	0	0
FBgn0041181	0	0	0	0	0
FBgn0041182	0	0	0	0	0
FBgn0041184	0	1	1	0	0
FBgn0045823	0	0	0	0	0
FBgn0010622	0	0	0	0	0
FBgn0053099	0	1	1	0	0
FBgn0053098	0	0	0	0	0
FBgn0039905	0	0	0	0	0
FBgn0010620	0	0	0	0	0
FBgn0032262	0	0	0	0	0
FBgn0032261	0	0	0	0	1
FBgn0053095	0	0	0	0	0
FBgn0053094	0	0	0	0	0
FBgn0053096	0	0	0	0	0
FBgn0002542	0	0	0	0	0
FBgn0003145	0	0	0	0	0
FBgn0003140	0	0	0	0	0
FBgn0053278	0	0	0	0	0
FBgn0003888	0	0	1	1	1
FBgn0022338	0	0	0	0	0
FBgn0003383	0	0	0	0	0
FBgn0024958	0	0	0	0	0
FBgn0024956	0	0	0	0	0
FBgn0035064	0	0	0	0	0
FBgn0035065	0	0	0	0	0
FBgn0038501	0	0	0	0	0
FBgn0035069	0	0	0	0	0
FBgn0031811	0	0	0	0	0
FBgn0031762	0	0	0	0	0
FBgn0031813	0	0	0	0	0
FBgn0031760	0	0	0	0	0
FBgn0031766	0	0	0	0	0
FBgn0031816	0	0	0	0	0
FBgn0031818	0	0	0	0	0
FBgn0031769	0	0	0	0	0
FBgn0052053	0	0	0	0	0
FBgn0052056	0	0	0	0	0
FBgn0052057	0	0	0	0	0
FBgn0028893	0	0	0	0	0
FBgn0028897	0	0	0	0	0
FBgn0028896	0	0	0	0	0
FBgn0028895	0	0	0	0	0
FBgn0040005	0	0	0	0	0
FBgn0031103	0	0	0	0	0
FBgn0043070	0	0	0	0	0
FBgn0026145	0	0	0	0	0
FBgn0026149	0	0	0	0	0
FBgn0026148	0	0	0	0	0
FBgn0051122	0	0	0	0	0
FBgn0051121	0	0	0	0	0
FBgn0051120	0	0	0	0	0
FBgn0051125	0	0	0	0	0
FBgn0035003	0	0	0	0	0
FBgn0051128	0	0	0	0	0
FBgn0038567	0	0	0	0	0
FBgn0038565	0	0	0	0	0
FBgn0039756	0	0	0	1	1
FBgn0039757	0	0	0	0	0
FBgn0039754	0	0	0	0	0
FBgn0039758	0	0	0	0	0
FBgn0039759	0	0	0	0	0
FBgn0037338	0	0	0	0	0
FBgn0037339	0	0	0	0	0
FBgn0037332	0	0	0	0	0
FBgn0037330	0	0	0	0	0
FBgn0037627	0	0	0	0	0
FBgn0037621	0	1	1	0	0
FBgn0000171	0	0	0	0	0
FBgn0001174	0	0	0	0	0
FBgn0001170	0	0	0	0	1
FBgn0004419	0	0	0	0	0
FBgn0033247	0	0	0	0	0
FBgn0050290	0	0	0	0	0
FBgn0050291	0	0	0	0	0
FBgn0050295	0	0	0	0	0
FBgn0033673	0	0	0	0	0
FBgn0003995	0	0	0	0	0
FBgn0037233	0	0	0	0	0
FBgn0003997	0	1	1	0	0
FBgn0027360	0	0	0	0	0
FBgn0027363	0	0	0	0	0
FBgn0037235	0	0	0	0	0
FBgn0033509	0	0	0	1	1
FBgn0036579	0	0	0	0	0
FBgn0036578	0	0	0	0	0
FBgn0033501	0	0	0	0	0
FBgn0033051	0	0	0	0	0
FBgn0033050	0	0	0	0	0
FBgn0033504	0	0	0	0	1
FBgn0033054	0	0	0	0	0
FBgn0037238	0	0	0	0	0
FBgn0032906	0	0	0	0	0
FBgn0032907	0	0	0	0	0
FBgn0032901	0	0	0	0	0
FBgn0035903	0	0	0	0	0
FBgn0035270	0	0	0	0	0
FBgn0035901	0	0	0	0	0
FBgn0035907	0	0	0	0	0
FBgn0035906	0	0	0	0	0
FBgn0035905	0	0	0	0	0
FBgn0035276	0	0	0	0	0
FBgn0021750	0	0	0	0	0
FBgn0002736	0	0	0	0	0
FBgn0002734	0	0	0	1	0
FBgn0002733	0	0	0	0	0
FBgn0019886	0	0	0	0	0
FBgn0032678	0	0	0	0	0
FBgn0032671	0	0	0	0	0
FBgn0032673	0	0	0	0	0
FBgn0039529	0	0	0	0	0
FBgn0033935	0	0	0	0	0
FBgn0003285	0	0	0	1	1
FBgn0030624	0	0	0	0	0
FBgn0001248	0	0	0	0	0
FBgn0000411	0	0	0	0	0
FBgn0000416	0	0	0	0	0
FBgn0039109	0	0	0	0	0
FBgn0039107	0	0	0	0	0
FBgn0003464	0	0	0	0	0
FBgn0039104	0	0	0	0	0
FBgn0003460	0	0	0	0	0
FBgn0003463	0	0	0	0	0
FBgn0003462	0	0	0	0	0
FBgn0031379	0	0	0	0	0
FBgn0031374	0	0	0	0	0
FBgn0031375	0	0	0	0	0
FBgn0031376	0	0	0	0	0
FBgn0031372	0	0	0	0	0
FBgn0017549	0	0	0	0	0
FBgn0017545	0	0	0	0	0
FBgn0036505	0	0	0	0	0
FBgn0016762	0	0	0	0	0
FBgn0016940	0	0	0	0	0
FBgn0036500	0	0	0	0	0
FBgn0036053	0	0	0	0	0
FBgn0037057	0	0	0	0	0
FBgn0015946	0	0	0	0	0
FBgn0015949	0	0	0	0	0
FBgn0031599	0	0	0	0	0
FBgn0031590	0	0	0	0	0
FBgn0031593	0	0	0	0	0
FBgn0031597	0	0	0	0	0
FBgn0037430	0	0	0	0	0
FBgn0030353	0	0	0	0	0
FBgn0030352	0	0	0	0	0
FBgn0030355	0	0	0	0	0
FBgn0030357	0	0	0	0	0
FBgn0030358	0	0	0	0	0
FBgn0036813	0	0	0	0	0
FBgn0036741	0	0	0	0	0
FBgn0033990	0	0	0	0	0
FBgn0036212	0	0	0	0	0
FBgn0036213	0	0	0	0	0
FBgn0036746	0	0	0	0	0
FBgn0031161	0	0	0	0	0
FBgn0034523	0	0	0	0	0
FBgn0034520	0	0	0	0	1
FBgn0034527	0	0	0	0	0
FBgn0002901	0	0	0	0	0
FBgn0011217	0	0	0	0	0
FBgn0026777	0	0	0	0	0
FBgn0051358	0	0	0	0	0
FBgn0010356	0	0	0	0	0
FBgn0010350	0	0	0	0	0
FBgn0051352	0	0	1	1	1
FBgn0051823	0	0	0	0	0
FBgn0010359	0	0	0	0	0
FBgn0051357	0	0	0	0	0
FBgn0037299	0	0	0	0	0
FBgn0037298	0	0	0	0	0
FBgn0037295	0	0	0	0	0
FBgn0037297	0	0	0	0	0
FBgn0037296	0	0	0	0	0
FBgn0037291	0	0	0	0	0
FBgn0037290	0	0	0	0	0
FBgn0037293	0	0	0	0	0
FBgn0037292	0	0	0	0	0
FBgn0050194	0	0	0	0	0
FBgn0050197	0	0	0	0	0
FBgn0032066	0	0	0	0	0
FBgn0032061	0	0	0	0	0
FBgn0004885	0	0	0	0	0
FBgn0032069	0	0	0	0	0
FBgn0032068	0	0	0	0	0
FBgn0004880	0	0	0	0	0
FBgn0033195	0	0	0	0	0
FBgn0039928	0	0	0	0	0
FBgn0039298	0	0	0	0	0
FBgn0039297	0	0	0	0	0
FBgn0039296	0	0	0	0	0
FBgn0039923	0	0	0	0	0
FBgn0039293	0	0	0	0	0
FBgn0032244	0	0	0	0	0
FBgn0032246	0	0	0	0	0
FBgn0053075	0	0	0	0	0
FBgn0052138	0	0	0	0	0
FBgn0037996	0	0	0	0	0
FBgn0037994	0	0	0	0	0
FBgn0053214	0	0	0	0	0
FBgn0053213	0	0	0	0	0
FBgn0037993	0	0	0	0	0
FBgn0037998	0	0	0	0	0
FBgn0037999	0	0	0	0	0
FBgn0028523	0	0	0	0	0
FBgn0028520	0	0	0	0	0
FBgn0028527	0	0	0	0	0
FBgn0025334	0	0	0	0	0
FBgn0028525	0	0	0	0	0
FBgn0028528	0	0	0	0	0
FBgn0029123	0	0	0	0	0
FBgn0038528	0	0	0	0	0
FBgn0035049	0	0	0	0	1
FBgn0035730	0	0	0	0	0
FBgn0038527	0	0	0	0	0
FBgn0038525	0	0	0	0	0
FBgn0035734	0	0	0	0	0
FBgn0035043	0	0	0	0	0
FBgn0035040	0	0	0	0	0
FBgn0035737	0	0	0	0	0
FBgn0003612	0	0	0	0	0
FBgn0031745	0	0	0	1	0
FBgn0031296	0	0	0	0	0
FBgn0031295	0	0	0	0	0
FBgn0031293	0	0	0	1	1
FBgn0031740	0	0	0	0	0
FBgn0031291	0	0	0	0	0
FBgn0031749	0	0	0	0	0
FBgn0031299	0	0	0	0	0
FBgn0031298	0	0	0	0	0
FBgn0017482	0	0	0	0	0
FBgn0052037	0	0	0	0	0
FBgn0052030	0	0	0	0	0
FBgn0052039	0	0	0	0	0
FBgn0025592	0	0	0	0	0
FBgn0043010	0	0	0	0	0
FBgn0026160	0	0	0	0	0
FBgn0043012	0	0	0	0	0
FBgn0016687	0	0	0	0	0
FBgn0016685	0	0	0	0	0
FBgn0016684	0	0	0	0	0
FBgn0051109	0	0	0	0	0
FBgn0051108	0	0	0	0	0
FBgn0031129	0	0	0	0	0
FBgn0039730	0	0	0	0	0
FBgn0039732	0	0	0	0	0
FBgn0039733	0	0	0	0	0
FBgn0039738	0	0	0	0	0
FBgn0031127	0	0	0	0	0
FBgn0030658	0	0	0	0	0
FBgn0030659	0	0	0	0	0
FBgn0037359	0	0	0	0	0
FBgn0037609	0	0	0	0	0
FBgn0037354	0	0	0	0	0
FBgn0037607	0	0	0	0	0
FBgn0014135	0	0	0	0	0
FBgn0030654	0	0	0	0	0
FBgn0030657	0	0	0	0	0
FBgn0011741	0	0	0	0	0
FBgn0011740	0	0	0	0	0
FBgn0011745	0	0	0	0	0
FBgn0037469	0	0	0	0	0
FBgn0040284	0	0	0	0	0
FBgn0040280	0	0	0	0	0
FBgn0040281	0	0	0	1	0
FBgn0040282	0	0	0	0	0
FBgn0040283	0	0	0	0	0
FBgn0035147	0	0	0	0	0
FBgn0038851	0	0	0	0	0
FBgn0020368	0	0	0	0	0
FBgn0014865	0	0	0	0	0
FBgn0050503	0	0	0	0	0
FBgn0038465	0	0	0	0	0
FBgn0014863	0	0	0	0	1
FBgn0038464	0	0	0	0	0
FBgn0033292	0	0	0	0	0
FBgn0033297	0	0	0	0	0
FBgn0027341	0	0	0	0	0
FBgn0034950	0	0	0	0	0
FBgn0034956	0	0	0	0	0
FBgn0038063	0	0	0	0	0
FBgn0033079	0	0	0	1	0
FBgn0035149	0	0	0	0	0
FBgn0036004	0	0	0	0	0
FBgn0033075	0	0	0	0	0
FBgn0033076	0	0	0	0	0
FBgn0036551	0	0	0	0	0
FBgn0039857	0	0	0	0	0
FBgn0036553	0	0	0	0	0
FBgn0033072	0	0	0	0	0
FBgn0032371	0	0	0	0	0
FBgn0015623	0	0	0	0	0
FBgn0015625	0	0	0	0	0
FBgn0001114	0	0	0	0	0
FBgn0001112	0	0	0	0	0
FBgn0035926	0	0	0	0	0
FBgn0035921	0	0	0	0	0
FBgn0035929	0	0	0	0	0
FBgn0028545	0	0	0	0	0
FBgn0021776	0	0	0	0	0
FBgn0037646	0	0	0	0	0
FBgn0001235	0	1	1	0	0
FBgn0037644	0	0	0	0	0
FBgn0052627	0	0	0	0	0
FBgn0052626	0	0	0	0	0
FBgn0037645	0	0	0	0	0
FBgn0034438	0	0	0	1	1
FBgn0032652	0	0	0	0	0
FBgn0032651	0	0	0	0	0
FBgn0032656	0	0	0	0	0
FBgn0032654	0	0	0	0	0
FBgn0025458	0	0	0	0	0
FBgn0052951	0	0	0	0	0
FBgn0052950	0	0	0	0	0
FBgn0025455	0	0	0	0	0
FBgn0052488	0	0	0	0	0
FBgn0003261	0	0	0	0	0
FBgn0029594	0	0	0	0	0
FBgn0062927	0	0	0	0	0
FBgn0039125	0	0	0	0	0
FBgn0039124	0	0	0	0	0
FBgn0039127	0	0	0	0	0
FBgn0039126	0	0	0	0	0
FBgn0039129	0	0	0	0	0
FBgn0039128	0	0	0	0	0
FBgn0031351	0	0	0	0	0
FBgn0031359	0	0	0	0	0
FBgn0017561	0	0	0	0	0
FBgn0038584	0	0	0	0	0
FBgn0012049	0	0	0	0	0
FBgn0035754	0	0	0	0	0
FBgn0011244	0	0	0	0	0
FBgn0011241	0	0	0	0	0
FBgn0035752	0	0	0	0	0
FBgn0044049	1	1	1	1	0
FBgn0037794	0	0	0	0	0
FBgn0036948	0	0	0	0	0
FBgn0032926	0	0	0	0	0
FBgn0034720	0	0	0	0	0
FBgn0034721	0	0	0	0	0
FBgn0034723	0	0	0	0	1
FBgn0034724	0	0	0	0	0
FBgn0034097	0	0	0	0	0
FBgn0034095	0	0	0	0	0
FBgn0034098	0	0	0	0	0
FBgn0034099	0	0	0	0	0
FBgn0038651	0	0	0	0	0
FBgn0038652	0	0	0	0	0
FBgn0038656	0	0	0	0	0
FBgn0038659	0	0	0	0	0
FBgn0032923	0	0	0	0	0
FBgn0036832	0	0	0	0	0
FBgn0036833	0	0	0	0	0
FBgn0036837	0	0	0	0	0
FBgn0030403	0	0	0	0	0
FBgn0036839	0	0	0	0	1
FBgn0034897	0	0	0	0	0
FBgn0034894	0	0	0	0	0
FBgn0010114	0	0	0	0	0
FBgn0034546	0	0	0	0	0
FBgn0038389	0	0	0	0	0
FBgn0034540	0	0	0	0	0
FBgn0038381	0	0	0	0	0
FBgn0038386	0	0	0	0	0
FBgn0038385	1	1	1	1	0
FBgn0019643	0	0	0	0	0
FBgn0015321	0	0	0	0	0
FBgn0015776	0	0	0	0	0
FBgn0037556	0	0	0	0	0
FBgn0062463	0	0	0	0	0
FBgn0000039	0	0	0	0	0
FBgn0000038	0	0	0	0	0
FBgn0025833	0	0	0	0	0
FBgn0036769	0	0	0	0	0
FBgn0036760	0	0	0	0	0
FBgn0085402	0	0	0	0	0
FBgn0031629	0	0	0	0	0
FBgn0032008	0	0	0	0	0
FBgn0032005	0	0	0	0	0
FBgn0032004	0	0	0	0	0
FBgn0032003	0	0	0	0	0
FBgn0032002	0	0	0	1	1
FBgn0032000	0	0	0	0	0
FBgn0037019	0	0	0	0	0
FBgn0037018	0	0	0	0	0
FBgn0004867	0	0	0	0	0
FBgn0004868	0	0	0	0	0
FBgn0037011	0	0	0	0	0
FBgn0037016	0	0	0	0	0
FBgn0037015	0	0	0	0	0
FBgn0005695	0	0	0	0	0
FBgn0036498	0	0	0	0	0
FBgn0036499	0	0	0	0	0
FBgn0036494	0	0	0	0	0
FBgn0036496	0	0	0	0	0
FBgn0001325	0	0	0	0	0
FBgn0053056	0	0	0	0	0
FBgn0001321	0	0	0	0	0
FBgn0001323	0	0	0	0	0
FBgn0053234	0	0	0	0	0
FBgn0024191	0	0	0	0	0
FBgn0038897	0	0	0	0	0
FBgn0038892	0	0	0	0	0
FBgn0033710	0	0	0	0	0
FBgn0033713	0	0	0	0	0
FBgn0033714	0	0	0	0	0
FBgn0033715	0	0	0	0	0
FBgn0033717	0	0	0	0	0
FBgn0028507	0	0	0	0	0
FBgn0028506	0	0	0	0	0
FBgn0022935	0	0	0	0	0
FBgn0028509	0	0	0	0	0
FBgn0024991	0	0	0	0	0
FBgn0035713	0	0	0	0	0
FBgn0035710	0	0	0	1	1
FBgn0035715	0	0	0	0	0
FBgn0035719	0	0	0	0	0
FBgn0052548	0	0	0	0	0
FBgn0032408	0	0	0	0	0
FBgn0030802	0	0	0	0	0
FBgn0063261	0	0	0	0	0
FBgn0045761	0	0	0	0	0
FBgn0025712	0	0	0	0	0
FBgn0025716	0	0	0	0	0
FBgn0051759	0	0	0	0	0
FBgn0040382	0	0	0	0	0
FBgn0031726	0	0	0	0	0
FBgn0031723	0	0	0	0	0
FBgn0031722	0	0	0	0	0
FBgn0031721	0	0	0	0	0
FBgn0030098	0	0	0	0	0
FBgn0030096	0	0	0	0	0
FBgn0030097	0	0	0	0	0
FBgn0030092	0	0	0	0	0
FBgn0030093	0	0	0	0	0
FBgn0030091	0	0	0	0	0
FBgn0039719	0	0	0	0	0
FBgn0039714	0	0	0	0	0
FBgn0039715	0	0	0	0	0
FBgn0039712	0	0	0	0	0
FBgn0039713	0	0	0	0	0
FBgn0039710	0	0	0	0	0
FBgn0039711	0	0	0	0	0
FBgn0034391	0	0	0	0	0
FBgn0034390	0	0	0	0	0
FBgn0034392	0	0	0	0	0
FBgn0034396	0	0	0	0	0
FBgn0034398	0	0	0	0	0
FBgn0030398	0	0	0	0	0
FBgn0037376	0	0	0	0	0
FBgn0037374	0	0	0	0	0
FBgn0037375	0	0	0	0	0
FBgn0037372	0	0	0	0	0
FBgn0037370	0	0	0	0	0
FBgn0037371	0	0	0	0	0
FBgn0030678	0	0	0	0	0
FBgn0030679	0	0	0	0	0
FBgn0037378	0	0	0	0	0
FBgn0030899	0	0	0	0	0
FBgn0011768	0	0	0	0	0
FBgn0011764	0	0	0	0	0
FBgn0011766	0	0	0	0	0
FBgn0011761	0	0	0	0	0
FBgn0011760	0	0	0	0	0
FBgn0029818	0	0	0	0	0
FBgn0029819	0	0	0	0	0
FBgn0029810	0	0	0	0	0
FBgn0029812	0	0	0	0	0
FBgn0029814	0	0	0	0	0
FBgn0029816	0	0	0	0	0
FBgn0051169	0	0	0	0	0
FBgn0037536	0	0	0	0	0
FBgn0051163	0	0	0	0	0
FBgn0000326	0	0	0	0	0
FBgn0033273	0	0	0	0	0
FBgn0033272	0	0	0	0	0
FBgn0033271	0	0	0	0	0
FBgn0033275	0	0	0	0	0
FBgn0033279	0	0	0	0	0
FBgn0034979	0	0	0	0	0
FBgn0034978	0	0	0	0	0
FBgn0034974	0	0	0	0	0
FBgn0083974	0	0	0	0	0
FBgn0034970	0	0	0	0	0
FBgn0038049	0	0	0	0	0
FBgn0038047	0	0	0	0	0
FBgn0038043	0	0	0	0	0
FBgn0038042	0	0	0	0	0
FBgn0033017	0	0	0	0	0
FBgn0036536	0	0	0	0	0
FBgn0033015	0	0	0	0	0
FBgn0036534	0	0	0	0	0
FBgn0036533	0	0	0	0	0
FBgn0036020	0	0	0	0	0
FBgn0036023	0	0	0	0	0
FBgn0033010	0	0	0	0	0
FBgn0013469	0	0	0	0	0
FBgn0033019	0	0	0	0	0
FBgn0036538	0	0	0	0	0
FBgn0015602	0	0	0	0	0
FBgn0015600	0	0	0	0	0
FBgn0051782	0	0	0	0	0
FBgn0015608	0	0	0	0	0
FBgn0001133	0	0	0	0	0
FBgn0001139	0	0	0	0	0
FBgn0001138	0	0	0	0	0
FBgn0002440	0	0	0	0	0
FBgn0005322	0	0	0	0	0
FBgn0028552	0	0	0	0	0
FBgn0039970	0	0	0	0	0
FBgn0030717	0	0	0	0	0
FBgn0005386	0	0	0	0	0
FBgn0034154	0	0	0	0	0
FBgn0032635	0	0	0	0	0
FBgn0023417	0	0	0	0	0
FBgn0024291	0	0	0	0	0
FBgn0024294	0	0	0	0	0
FBgn0035946	0	0	0	0	0
FBgn0035944	0	0	0	0	0
FBgn0035941	0	0	0	0	0
FBgn0028992	0	0	0	0	0
FBgn0028993	0	0	0	0	0
FBgn0028990	0	0	0	0	0
FBgn0028999	0	0	0	0	0
FBgn0003244	0	0	0	0	0
FBgn0085248	0	0	0	0	0
FBgn0003249	0	0	0	0	0
FBgn0003248	0	0	0	0	0
FBgn0037813	0	0	0	0	0
FBgn0037816	0	1	1	1	1
FBgn0037814	0	0	0	0	0
FBgn0037818	0	0	0	0	0
FBgn0062417	0	0	0	0	0
FBgn0003429	0	0	0	0	0
FBgn0037700	0	0	0	0	0
FBgn0042710	0	0	0	0	0
FBgn0034755	0	0	0	0	0
FBgn0028689	0	0	0	0	0
FBgn0034025	0	0	0	0	0
FBgn0035360	0	0	0	0	0
FBgn0035367	0	0	0	0	0
FBgn0034758	0	0	0	0	0
FBgn0016724	0	0	0	0	0
FBgn0016726	0	0	0	0	0
FBgn0030589	0	0	0	0	0
FBgn0037433	0	0	0	0	0
FBgn0034708	0	0	0	0	0
FBgn0034709	0	0	0	0	0
FBgn0034703	0	0	0	0	0
FBgn0034706	0	0	0	0	0
FBgn0034707	0	0	0	0	0
FBgn0038678	0	0	0	0	0
FBgn0038679	0	0	0	0	1
FBgn0038672	0	0	0	0	0
FBgn0038675	0	0	0	0	0
FBgn0052209	0	0	0	0	0
FBgn0030469	0	0	0	0	0
FBgn0030467	0	0	0	0	0
FBgn0030465	0	0	0	0	0
FBgn0052207	0	0	0	0	0
FBgn0052205	0	0	0	0	0
FBgn0052204	0	0	0	0	0
FBgn0036856	0	0	0	0	0
FBgn0036857	0	0	0	0	0
FBgn0036882	0	0	0	1	0
FBgn0034567	0	0	0	0	0
FBgn0034564	0	0	0	0	0
FBgn0040653	0	0	0	0	0
FBgn0010391	0	0	0	0	0
FBgn0010397	0	0	0	0	0
FBgn0010395	0	0	0	0	0
FBgn0036381	0	0	1	1	0
FBgn0010399	0	0	0	0	0
FBgn0010398	0	0	0	0	0
FBgn0030289	0	0	0	0	0
FBgn0036383	0	0	0	0	0
FBgn0051313	0	0	0	0	0
FBgn0030280	0	0	0	0	0
FBgn0000015	0	0	0	0	0
FBgn0039509	0	0	0	0	0
FBgn0039503	0	0	0	0	0
FBgn0039501	0	0	0	0	0
FBgn0039505	0	0	0	0	0
FBgn0036703	0	0	0	0	0
FBgn0032021	0	0	0	0	0
FBgn0032022	0	0	0	0	0
FBgn0032025	0	0	0	0	0
FBgn0032029	0	0	0	0	0
FBgn0037038	0	0	0	0	0
FBgn0037035	0	0	0	0	0
FBgn0037031	0	0	0	0	0
FBgn0032285	0	0	0	0	0
FBgn0032287	0	0	0	0	0
FBgn0032286	0	0	0	0	0
FBgn0032281	0	0	0	0	0
FBgn0032283	0	0	0	0	0
FBgn0032282	0	0	0	0	0
FBgn0001301	0	0	0	0	0
FBgn0050043	0	0	0	0	0
FBgn0050047	0	0	0	0	0
FBgn0050046	0	0	0	0	0
FBgn0033480	0	0	0	0	0
FBgn0033481	0	0	0	0	0
FBgn0033483	0	0	0	0	0
FBgn0035550	0	0	0	0	0
FBgn0035551	0	0	0	0	0
FBgn0038874	0	0	0	0	0
FBgn0038876	0	0	0	0	0
FBgn0035557	0	0	0	0	0
FBgn0038879	0	0	0	0	0
FBgn0035889	0	0	0	0	0
FBgn0038129	0	0	0	0	0
FBgn0033736	0	0	0	0	0
FBgn0028569	0	0	0	0	0
FBgn0028563	0	0	0	0	0
FBgn0028562	0	0	0	0	0
FBgn0028560	0	0	0	0	0
FBgn0035089	0	0	0	0	0
FBgn0035082	0	0	0	0	0
FBgn0035087	0	0	0	0	0
FBgn0035084	0	0	0	0	0
FBgn0035776	0	0	0	0	0
FBgn0035771	0	0	0	0	0
FBgn0035772	0	0	0	0	0
FBgn0037730	0	0	0	0	0
FBgn0034311	0	0	0	0	0
FBgn0003655	0	0	0	0	0
FBgn0003651	0	0	0	0	0
FBgn0031987	0	0	0	0	0
FBgn0052442	0	0	0	0	0
FBgn0052560	0	0	0	0	0
FBgn0052564	0	0	0	0	0
FBgn0028383	0	0	0	0	0
FBgn0028381	0	0	0	0	0
FBgn0028380	0	0	0	0	0
FBgn0028387	0	0	0	0	0
FBgn0037574	0	0	0	0	0
FBgn0010940	0	0	0	0	0
FBgn0029167	0	0	0	0	0
[truncated: 3,752 more rows]
