# Supplementary material for: Predicting Spatial and Temporal Gene Expression Using an Integrative Model of Transcription Factor Occupancy and Chromatin State
Source: PLoS Comput Biol. 2012 Dec 6;8(12):e1002798. doi: 10.1371/journal.pcbi.1002798 (PMC3516547; doi:10.1371/journal.pcbi.1002798)
Supplement: Dataset S8 — Manually curated annotations for top 100 VM predictions. (XLS) [file pcbi.1002798.s008.xls]

## Sheet: Wilczynski_Dataset_S8
FBGN	CG	name	VM	VM_train	VM_old	VM_new	Valdiated	Valdiation source	Positive	Negative
FBgn0002773	CG2184	Mlc2	0.0454596	0	0	0	Yes	Literature	1
FBgn0086783	CG17927	Mhc	0.0446641	-1	-1	-1	Yes	Literature	1
FBgn0038744	CG4733	CG4733	0.0443897	-1	-1	-1
FBgn0037835	CG14687	CG14687	0.0440196	1	1	1	In training set	BDGP	1
FBgn0004028	CG7178	wupA	0.0438969	1	1	1	In training set	BDGP	1
FBgn0000568	CG8127	Eip75B	0.0435032	0	0	0	No	Our Double FISH		1
FBgn0033495	CG12214	CG12214	0.0433403	0	0	0	No	BDBP		1
FBgn0033654	CG8991	Sobp	0.0421318	1	1	1	In training set	BDGP	1
FBgn0004117	CG4843	Tm2	0.0418388	1	1	1	In training set	BDGP	1
FBgn0033633	CG7759	CG7759	0.0415878	-1	-1	-1	?
FBgn0001186	CG3001	Hex-A	0.0401519	-1	0	0	No	Our Double FISH		1
FBgn0010397	CG10119	LamC	0.0390046	0	0	0	Yes	Literature and BDGP	1
FBgn0032587	CG5953	CG5953	0.0386885	0	0	0	No	BDBP		1
FBgn0011722	CG11527	Tig	0.0386842	0	0	0	Yes	Literature	1
FBgn0032820	CG31692	fbp	0.0383583	-1	1	1	Yes	BDGP	1
FBgn0002772	CG5596	Mlc1	0.0381481	1	1	1	In training set	BDGP	1
FBgn0002789	CG4696	Mp20	0.0379187	1	1	1	In training set	BDGP	1
FBgn0035192	CG9194	CG9194	0.0373465	0	0	0	Yes	Our Double FISH	1
FBgn0036474	CG17871	Or71a	0.0369584	-1	-1	-1
FBgn0005666	CG32019	bt	0.0366367	0	0	0	Yes	Our Double FISH	1
FBgn0010423	CG9073	TpnC47D	0.0365602	-1	-1	-1
FBgn0008649	CG5441	dei	0.0364793	1	1	1	In training set	BDGP	1
FBgn0023095	CG11282	caps	0.0357678	-1	-1	-1	? NMJ
FBgn0260003	CG34157	Dys	0.0353625	-1	-1	-1	Yes	Literature and BDGP	1
FBgn0034438	CG9416	CG9416	0.034783	1	1	1	In training set	BDGP	1
FBgn0037646	CG11967	CG11967	0.0346544	0	0	0	No	BDBP		1
FBgn0011286	CG10844	Rya-r44F	0.0335619	0	0	0	Yes	Our Double FISH	1
FBgn0001228	CG4456	Hsp67Bb	0.0332701	-1	-1	-1	No	BDBP		1
FBgn0001223	CG4460	Hsp22	0.0332701	-1	-1	-1	No	Our Double FISH		1
FBgn0015774	CG10521	NetB	0.0324988	1	1	1	In training set	BDGP	1
FBgn0027580	CG1516	CG1516	0.0321851	-1	-1	0	No	Our Double FISH		1
FBgn0032897	CG9336	CG9336	0.0320056	0	0	0	No	BDBP		1
FBgn0001229	CG4190	Hsp67Bc	0.031853	-1	-1	0	No	BDBP		1
FBgn0259175	CG42280	ome	0.0314913	-1	-1	-1	No	BDBP		1
FBgn0000044	CG10067	Act57B	0.0309552	0	0	0	Yes	Literature	1
FBgn0065059	CR33780	snoRNA:660	0.0306647	-1	-1	-1	NA
FBgn0031908	CG5177	CG5177	0.0301363	0	0	0	Yes	BDGP	1
FBgn0025693	CG11163	CG11163	0.029813	0	0	0	NA
FBgn0036732	CG7571	Oatp74D	0.0292587	0	0	0	NA
FBgn0036294	CG10654	CG10654	0.0289707	0	0	0	Yes	Our Double FISH	1
FBgn0051146	CG31146	CG31146	0.0285905	0	0	0	NA
FBgn0034412	CG15105	abba	0.0283475	0	0	0	? test
FBgn0028550	CG11405	A3-3	0.028067	-1	-1	-1	No	Our Double FISH		1
FBgn0000244	CG9379	by	0.0280489	-1	-1	-1	Yes	Our Double FISH	1
FBgn0031685	CG42768	Msp-300	0.0276944	-1	-1	-1	Yes	Literature	1
FBgn0042696	CG2380	NfI	0.0274315	-1	-1	0	No	BDBP		1
FBgn0025632	CG4313	CG4313	0.0273171	-1	1	1	Yes	BDGP	1
FBgn0036282	CG14122	Smyd4	0.027054	1	1	1	In training set	BDGP	1
FBgn0053205	CG33205	CG33205	0.02705	0	0	0	No	BDBP		1
FBgn0036945	CG6981	CG6981	0.0270259	0	0	0	No	Our Double FISH		1
FBgn0036672	CG42679	Lmpt	0.0267789	1	1	1	In training set	BDGP	1
FBgn0010424	CG7930	TpnC73F	0.0267598	0	0	0	Yes	Literature	1
FBgn0003149	CG5939	Prm	0.0266492	-1	-1	-1	Yes	Literature	1
FBgn0037144	CG7458	CG7458	0.026624	-1	0	0	? Midgut or VM
FBgn0036279	CG4357	Ncc69	0.0265753	-1	-1	-1	Yes	Our Double FISH	1
FBgn0004919	CG2679	gol	0.0265696	0	0	0	Yes	Literature	1
FBgn0033446	CG1648	CG1648	0.0263773	1	1	1	In training set	BDGP	1
FBgn0020269	CG10145	mspo	0.0261737	0	0	0	No	BDBP		1
FBgn0032428	CG6405	CG6405	0.0260595	0	0	0	No	BDBP		1
FBgn0025701	CG14709	CG14709	0.0258977	-1	-1	-1	No	Our Double FISH		1
FBgn0020439	CG6544	fau	0.0257922	0	0	0	Yes	Our Double FISH	1
FBgn0040600	CG13631	CG13631	0.025481	0	0	0	? Forgut VM
FBgn0032469	CG9932	CG9932	0.0253772	-1	-1	-1	NA
FBgn0037114	CG7160	Cpr78E	0.0253567	0	0	0	Yes	Our Double FISH	1
FBgn0030797	CG13004	CG13004	0.0251288	0	0	0	Maybe hindgut VM st16
FBgn0037565	CG9626	CG9626	0.0248348	-1	-1	-1	NA
FBgn0052365	CG32365	CG32365	0.0246895	-1	-1	-1	NA
FBgn0036821	CG3961	CG3961	0.0246182	0	0	0
FBgn0031064	CG12531	CG12531	0.0244874	-1	-1	-1	NA
FBgn0064227	CG14975	Rdh	0.0243237	-1	-1	-1	test ?
FBgn0036935	CG14186	CG14186	0.0240379	0	0	0	No	BDBP		1
FBgn0054007	CG34007	CG34007	0.0240077	-1	-1	-1	NA
FBgn0037447	CG2330	Neurochondrin	0.0239438	0	0	0	Yes	Literature + BDGP	1
FBgn0039007	CG4910	Ccap	0.0239097	-1	-1	-1	NA
FBgn0032209	CG18144	Hand	0.0238577	-1	-1	1	Yes	New BDGP	1
FBgn0050240	CR30240	tRNA:CR30240	0.0237688	-1	-1	-1	NA
FBgn0032156	CG13124	CG13124	0.0235497	0	0	0	Yes	Our Double FISH	1
FBgn0039008	CG6972	CG6972	0.0234874	1	1	1	In training set	BDGP	1
FBgn0051619	CG31619	CG31619	0.0234456	0	0	0
FBgn0039430	CG5455	CG5455	0.0233814	0	0	0
FBgn0034999	CG3394	CG3394	0.0233494	-1	0	0	No	BDBP		1
FBgn0015776	CG9258	nrv1	0.0233249	0	0	0	No	Our Double FISH		1
FBgn0259209	CG42309	Mlp60A	0.023191	-1	-1	-1	Yes	Literature + BDGP	1
FBgn0002023	CG10699	Lim3	0.0230606	0	0	0	No	Our Double FISH		1
FBgn0031630	CG15629	CG15629	0.0228843	-1	-1	0	NA
FBgn0038256	CG7530	CG7530	0.0228583	-1	-1	0	No	Our Double FISH		1
FBgn0035711	CG8519	CG8519	0.0227507	-1	-1	-1	NA
FBgn0000116	CG32031	Argk	0.0226923	-1	1	1	Yes	BDGP	1
FBgn0013433	CG4846	beat-Ia	0.0225958	0	0	0
FBgn0037275	CG14655	CG14655	0.0225754	0	0	0	Yes	Our Double FISH	1
FBgn0035798	CG7526	CG7526	0.0224866	1	1	1	In training set	BDGP	1
FBgn0050080	CG30080	CG30080	0.0224639	-1	-1	-1	NA
FBgn0067709	CR33598	mir-282	0.0224618	-1	-1	-1	NA
FBgn0016660	CG6604	H15	0.0223919	-1	-1	0	NA
FBgn0033782	CG3850	sug	0.0223506	0	0	0	? Probably but not annotated
FBgn0032400	CG6770	CG6770	0.0223341	-1	-1	-1	No	Our Double FISH		1
FBgn0002922	CG10250	nau	0.0223243	-1	-1	-1	No	Literature		1
FBgn0034137	CG4945	CG4945	0.0222601	0	0	0	Yes	Our Double FISH	1
FBgn0034638	CG10433	CG10433	0.0221611	0	0	0	No	BDBP		1
FBgn0039075	CG4393	CG4393	0.0221049	-1	-1	-1	NA		42	26
FBgn0032889	CG9331	CG9331	0.0220179	0	0	0	0
FBgn0032497	CG6043	CG6043	0.021961	-1	-1	-1	NA
FBgn0039761	CG18404	CG18404	0.0218998	-1	-1	-1	NA
FBgn0001258	CG10160	ImpL3	0.0218271	0	0	0	0
FBgn0004858	CG4220	elB	0.0215447	-1	-1	1	Yes	New BDGP
FBgn0020429	CG7234	GluRIIB	0.0213687	-1	-1	-1	NA
FBgn0000015	CG11648	Abd-B	0.021277	-1	-1	0	Yes	Literature + BDGP
FBgn0052645	CG32645	CG32645	0.0210488	-1	-1	-1	NA
FBgn0029974	CG10946	dpr14	0.0209634	0	0	0	0
FBgn0038143	CG9813	CG9813	0.0208702	-1	-1	-1	NA
FBgn0031322	CG5001	CG5001	0.0207568	-1	-1	-1	NA
FBgn0001092	CG8893	Gapdh2	0.0206979	-1	-1	-1	NA
FBgn0038494	CG4135	beat-IIb	0.0206524	-1	-1	-1	NA
FBgn0085370	CG34341	Pde11	0.0205851	-1	-1	-1	0
FBgn0085376	CG34347	CG34347	0.0203529	-1	-1	-1	NA
FBgn0033504	CG18408	CAP	0.0201388	1	1	1	In training set	BDGP
FBgn0039536	CG18437	CG18437	0.019926	-1	-1	-1	NA
FBgn0026087	CG3600	CG3600	0.0198212	-1	-1	-1	NA
FBgn0039897	CG1674	CG1674	0.0197682	0	0	0	0
FBgn0035710	CG10121	SP1173	0.0196103	1	1	1	In training set	BDGP
FBgn0043841	CG31764	vir-1	0.0194669	-1	-1	0	0
FBgn0004911	CR32265	Eip63F-2	0.0192694	-1	-1	-1	NA
FBgn0083956	CG34120	CG34120	0.0192665	-1	-1	-1	0
FBgn0028494	CG6424	CG6424	0.0192005	-1	-1	-1	NA
FBgn0036946	CG42674	CG42674	0.0189736	-1	-1	0	NA
FBgn0027596	CG10249	CG10249	0.0188453	0	0	0	0
FBgn0259680	CG42349	Pkcdelta	0.0186876	-1	-1	-1	NA
FBgn0035649	CG10483	CG10483	0.0182137	-1	-1	-1	NA
FBgn0039667	CG2010	CG2010	0.0181761	0	0	0	0
FBgn0046113	CG4226	GluRIIC	0.0180859	-1	-1	-1	Yes	Literature + BDGP
FBgn0052159	CG32159	dsx-c73A	0.0180479	0	0	0	0
FBgn0039704	CG7802	neo	0.0179462	0	0	0	0
FBgn0029824	CG3726	CG3726	0.0176365	0	0	0	0
FBgn0260499	CG33472	qvr	0.0174821	-1	-1	-1	NA
FBgn0024988	CG42666	CG42666	0.0174643	0	0	0	0
FBgn0039896	CG1629	yellow-h	0.0171649	-1	-1	-1	NA
FBgn0028422	CG18039	KaiRIA	0.0169706	-1	-1	-1	NA
FBgn0033538	CG11883	CG11883	0.0169204	0	0	0	0
FBgn0027610	CG8790	CG8790	0.016549	-1	-1	-1	NA
FBgn0052785	CR32785	tRNA:CR32785	0.0164945	-1	-1	-1	NA
FBgn0040229	CG42610	Fhos	0.0164655	-1	-1	-1	NA
FBgn0050460	CG30460	CG30460	0.0164497	-1	-1	-1	NA
FBgn0035218	CG9173	CG9173	0.0162705	-1	-1	-1	NA
FBgn0085387	CG34358	shakB	0.0162442	-1	-1	-1	0
FBgn0086408	CG3622	stl	0.0162126	-1	-1	-1	0
FBgn0025640	CG13369	CG13369	0.0161871	-1	-1	-1	NA
FBgn0004370	CG1817	Ptp10D	0.0161593	-1	-1	-1	NA
FBgn0033402	CG2078	Myd88	0.0159249	0	0	0	NA
FBgn0030452	CG4330	CG4330	0.0158989	-1	-1	-1	0
FBgn0050280	CG30280	CG30280	0.0158637	-1	-1	-1	NA
FBgn0036043	CG8177	CG8177	0.015712	-1	-1	-1
FBgn0036752	CG5992	Adgf-A	0.0157038	1	1	1	In training set	BDGP
FBgn0043025	CG32178	Msi	0.0156438	-1	-1	-1
FBgn0030992	CG33253	CG33253	0.015642	1	1	-1	In training set	BDGP
FBgn0038149	CG9796	CG9796	0.0149724	0	0	0
FBgn0046763	CG17278	CG17278	0.0146936	-1	-1	-1
FBgn0051057	CG31057	tau	0.014577	0	0	0
FBgn0051485	CR31485	tRNA:CR31485:Psi	0.0144885	-1	-1	-1
FBgn0038250	CG3505	CG3505	0.0141301	0	0	0
FBgn0010263	CG3151	Rbp9	0.0138175	-1	-1	-1
FBgn0038341	CG14869	CG14869	0.0137048	0	0	0
FBgn0050206	CR30206	tRNA:CR30206	0.0136516	-1	-1	-1
FBgn0027547	CG1927	CG1927	0.0135021	0	0	0
FBgn0004507	CG7254	GlyP	0.0134682	-1	0	0
FBgn0037913	CG6783	CG6783	0.0132842	-1	-1	-1
FBgn0033764	CG8776	nemy	0.0132079	1	1	1	In training set	BDGP
FBgn0051028	CG31028	CG31028	0.0132039	0	0	0
FBgn0030478	CG1640	CG1640	0.0131717	-1	-1	-1
FBgn0050035	CG30035	Tret1-1	0.0127605	0	0	0
FBgn0086913	CG34410	Rab26	0.0126297	-1	-1	0
FBgn0012017	CR31986	tRNA:Y1:22Fb	0.0120864	-1	-1	-1
FBgn0031214	CG11374	CG11374	0.0120623	-1	-1	-1
FBgn0038874	CG5911	ETHR	0.0118013	-1	-1	0
FBgn0025683	CG3164	CG3164	0.0114847	0	0	0
FBgn0052030	CG42610	Fhos	0.0112899	0	0	0
FBgn0259822	CG42403	Ca-beta	0.0112579	-1	-1	-1
FBgn0051324	CG31324	CG31324	0.0111386	0	0	-1
FBgn0037553	CG18249	CG18249	0.0110373	-1	-1	-1
FBgn0050241	CR30241	tRNA:CR30241	0.0109564	-1	-1	-1
FBgn0033856	CG13334	CG13334	0.0107824	-1	-1	-1
FBgn0000546	CG1765	EcR	0.0106594	0	0	0
FBgn0039109	CG10365	CG10365	0.0105749	0	0	0
FBgn0033519	CG11825	CG11825	0.0105499	0	0	0
FBgn0033765	CG8776	nemy	0.010521	0	0	0
FBgn0032683	CG10275	kon	0.0104343	0	0	0
FBgn0003129	CG9610	Poxm	0.0103787	-1	-1	0
FBgn0031453	CG9894	CG9894	0.0103687	0	0	0
FBgn0000097	CG3166	aop	0.0103333	0	0	0
FBgn0026144	CG1435	CBP	0.0103095	-1	0	0
FBgn0035583	CG13704	CG13704	0.0103015	0	0	0
FBgn0003721	CG4898	Tm1	0.0102894	-1	-1	1	Yes	New BDGP
FBgn0065099	CR33925	snmRNA:331	0.0102726	-1	-1	-1
FBgn0005630	CG12052	lola	0.0102273	0	0	0
FBgn0004860	CG3895	ph-d	0.0101582	-1	-1	-1
FBgn0086899	CG34412	tlk	0.0101476	-1	-1	-1
FBgn0041096	CG32096	rols	0.0100656	0	0	0
FBgn0035626	CG17334	lin-28	0.0100297	0	0	0
FBgn0037804	CG11870	CG11870	0.0099907	-1	-1	-1
FBgn0032026	CG7627	CG7627	0.0098972	-1	-1	-1
FBgn0039039	CG4677	lmd	0.0098617	0	0	0
FBgn0004876	CG6027	cdi	0.0098053	0	0	0
FBgn0054021	CG34021	CG34021	0.0097914	-1	-1	-1
FBgn0026403	CG12908	Ndg	0.0097399	-1	-1	-1
FBgn0035144	CG17181	CG17181	0.0097267	-1	-1	1	Yes	New BDGP
FBgn0086910	CG6930	l(3)neo38	0.0097096	-1	-1	-1
FBgn0086364	CG12537	rdx	0.009688	-1	-1	-1
FBgn0034570	CG10543	CG10543	0.0096108	0	0	0
FBgn0259176	CG42281	bun	0.0094746	-1	-1	-1
FBgn0014163	CG4609	fax	0.0094674	-1	-1	-1
FBgn0039846	CG11337	CG11337	0.0094552	-1	0	0
FBgn0010575	CG5580	sbb	0.0094052	-1	0	0
FBgn0053197	CG33197	mbl	0.0093498	-1	-1	-1
FBgn0004834	CG17998	Gprk2	0.0093477	-1	-1	-1
FBgn0041210	CG1770	HDAC4	0.0093111	-1	-1	-1
FBgn0032633	CG6860	CG6860	0.0092783	-1	0	0
FBgn0029504	CG12690	CHES-1-like	0.0092659	-1	-1	-1
FBgn0003165	CG9755	pum	0.0092159	-1	-1	-1
FBgn0034420	CG10737	CG10737	0.0091959	0	0	0
FBgn0000635	CG3665	Fas2	0.0091753	-1	-1	-1
FBgn0038535	CG18212	alt	0.0091702	0	0	0
FBgn0002632	CG8354	m6	0.0091564	-1	-1	-1
FBgn0038536	CG7655	CG7655	0.0091082	-1	1	1	Yes	BDGP
FBgn0015218	CG4035	eIF-4E	0.009095	0	0	0
FBgn0037607	CG8036	CG8036	0.0090822	0	0	0
FBgn0005536	CG32156	Mbs	0.0090575	1	1	1	In training set	BDGP
FBgn0037635	CG9837	CG9837	0.0090504	0	0	0
FBgn0029538	CG14632	CG14632	0.0090439	-1	-1	-1
FBgn0020503	CG5020	CLIP-190	0.0089974	0	0	0
FBgn0065098	CR33682	RNaseMRP:RNA	0.0089945	-1	-1	-1
FBgn0003435	CG9218	sm	0.0089594	0	0	0
FBgn0038678	CG14283	mRpL55	0.00895	0	0	0
FBgn0020386	CG1210	Pk61C	0.0089428	0	0	0
FBgn0036030	CG6767	CG6767	0.0089344	-1	0	0
FBgn0004861	CG18412	ph-p	0.0089301	-1	-1	-1
FBgn0036428	CG9238	CG9238	0.0089248	-1	0	0
FBgn0010609	CG8732	Acsl	0.0089227	-1	-1	0
FBgn0016120	CG6030	ATPsyn-d	0.0088933	-1	0	0
FBgn0035145	CG12031	MED14	0.0088844	-1	-1	0
FBgn0037819	CG14688	CG14688	0.0088198	-1	-1	-1
FBgn0030745	CG4239	CG4239	0.0087358	0	0	0
FBgn0036844	CG14080	Mkp3	0.0087283	-1	1	1	Yes	BDGP
FBgn0050389	CG30389	CG30389	0.0087251	-1	-1	-1
FBgn0038078	CG14391	CG14391	0.0087177	-1	-1	-1
FBgn0002578	CG8342	m1	0.0086923	0	0	0
FBgn0003870	CG1856	ttk	0.0086921	0	0	0
FBgn0046776	CR14033	CR14033	0.008676	-1	-1	-1
FBgn0026188	CG42670	ps	0.0086715	0	0	0
FBgn0260233	CG42507	CG42507	0.0086345	-1	-1	-1
FBgn0259938	CG17100	cwo	0.0086079	-1	-1	-1
FBgn0003502	CG8049	Btk29A	0.008602	-1	0	0
FBgn0040487	CG12487	BobA	0.0085732	-1	-1	-1
FBgn0030900	CG15064	Him	0.0085615	1	1	1	In training set	BDGP
FBgn0085403	CG34374	Rapgap1	0.0085514	-1	-1	-1
FBgn0002543	CG5481	lea	0.0085294	-1	-1	-1
FBgn0001142	CG2718	Gs1	0.0085158	-1	0	0
FBgn0028582	CG8532	lqf	0.0085136	0	0	0
FBgn0014388	CG1921	sty	0.0085101	-1	-1	-1
FBgn0038071	CG6234	CG6234	0.0085002	-1	-1	-1
FBgn0003396	CG7734	shn	0.0084678	-1	-1	-1
FBgn0013263	CG33261	Trl	0.0084457	-1	0	0
FBgn0000721	CG10033	for	0.0084447	-1	1	1	Yes	BDGP
FBgn0052179	CG32179	Krn	0.0084418	0	0	0
FBgn0052177	CG32177	CG32177	0.0084418	-1	0	0
FBgn0032130	CG3838	CG3838	0.0084259	-1	0	0
FBgn0086906	CG1915	sls	0.0084233	-1	-1	-1
FBgn0015803	CG10043	rtGEF	0.0084155	-1	-1	-1
FBgn0038661	CG17836	Xrp1	0.0083962	-1	-1	-1
FBgn0250788	CG5870	beta-Spec	0.0083882	-1	-1	-1
FBgn0011872	CR30210	tRNA:G3:57BCb	0.0083642	-1	-1	-1
FBgn0000046	CG18290	Act87E	0.0083614	-1	1	1	Yes	BDGP
FBgn0037363	CG1347	CG1347	0.0083511	-1	-1	-1
FBgn0050209	CR30209	tRNA:CR30209	0.008344	-1	-1	-1
FBgn0050055	CR30055	CR30055	0.0083323	-1	-1	-1
FBgn0026869	CG1981	Thd1	0.0083132	-1	0	0
FBgn0035983	CG4080	CG4080	0.0082942	0	0	0
FBgn0051630	CG31630	CG31630	0.0082827	-1	-1	-1
FBgn0005427	CG3114	ewg	0.0082809	-1	-1	-1
FBgn0001168	CG6494	h	0.0082709	-1	-1	0
FBgn0036745	CG7484	CG7484	0.0082545	-1	-1	-1
FBgn0004509	CG10772	Fur1	0.0082464	-1	-1	0
FBgn0010323	CG2851	Gsc	0.008238	-1	-1	0
FBgn0035978	CG4347	UGP	0.0082276	0	0	0
FBgn0086655	CG9397	jing	0.0082173	-1	-1	-1
FBgn0052039	CG32039	CG32039	0.0082127	0	0	0
FBgn0086901	CG34389	cv-c	0.0082007	-1	-1	-1
FBgn0260635	CG12284	th	0.0081994	-1	-1	-1
FBgn0050227	CR30227	tRNA:CR30227	0.0081832	-1	-1	-1
FBgn0028540	CG9008	CG9008	0.0081817	0	0	0
FBgn0011868	CR30228	tRNA:G3:55E	0.0081785	-1	-1	-1
FBgn0005624	CG3886	Psc	0.008164	-1	-1	-1
FBgn0030150	CG15319	nej	0.0081382	-1	-1	-1
FBgn0003867	CG6705	tsl	0.0081248	0	0	0
FBgn0036134	CG11799	fd68A	0.0081242	0	0	0
FBgn0259745	CG42396	wech	0.0081192	-1	-1	-1
FBgn0084245	CR34647	tre-3	0.0081176	-1	-1	-1
FBgn0004606	CG1322	zfh1	0.0081034	-1	0	0
FBgn0039633	CG11873	CG11873	0.0080786	0	0	-1
FBgn0003891	CG9450	tud	0.0080702	-1	-1	-1
FBgn0260400	CG4262	elav	0.0080077	-1	-1	-1
FBgn0000472	CG10798	dm	0.0080062	-1	0	0
FBgn0004397	CG3299	Vinc	0.0079849	-1	0	0
FBgn0034082	CG10734	CG10734	0.0079445	-1	-1	0
FBgn0029830	CG14447	Grip	0.0079439	-1	-1	-1
FBgn0034520	CG13424	CG13424	0.0079048	0	0	0
FBgn0010772	CG2179	Xe7	0.0078961	-1	-1	-1
FBgn0010768	CG5557	sqz	0.0078846	-1	-1	0
FBgn0010382	CG3938	CycE	0.0078827	-1	0	0
FBgn0029915	CG14434	CG14434	0.0078689	-1	-1	-1
FBgn0035337	CG15877	CG15877	0.0078449	-1	-1	-1
FBgn0030293	CG1737	CG1737	0.0078429	-1	-1	-1
FBgn0050122	CG30122	CG30122	0.0078385	-1	-1	-1
FBgn0010300	CG10719	brat	0.007832	-1	0	0
FBgn0028691	CG10230	Rpn9	0.0078315	-1	0	0
FBgn0036980	CG5701	RhoBTB	0.0078066	0	0	0
FBgn0005672	CG10334	spi	0.0077995	-1	1	1	Yes	BDGP
FBgn0003717	CG5490	Tl	0.0077842	-1	-1	-1
FBgn0005631	CG13521	robo	0.0077766	-1	-1	-1
FBgn0004551	CG3725	Ca-P60A	0.0077671	-1	0	0
FBgn0051603	CR31603	tRNA:CR31603	0.0077659	-1	-1	-1
FBgn0052711	CG32711	CG32711	0.0077658	0	0	0
FBgn0001205	CG10367	Hmgcr	0.0077614	0	0	0
FBgn0004369	CG11516	Ptp99A	0.0077518	-1	-1	-1
FBgn0003328	CG8095	scb	0.0077491	-1	-1	-1
FBgn0034644	CG10082	CG10082	0.007698	0	0	0
FBgn0260659	CG42542	CG42542	0.0076616	-1	-1	-1
FBgn0001332	CG10109	L	0.0076368	-1	-1	-1
FBgn0040089	CG14233	meso18E	0.0076361	1	1	1	In training set	BDGP
FBgn0035397	CG11486	CG11486	0.0076031	0	0	0
FBgn0039858	CG11525	CycG	0.0076014	-1	-1	-1
FBgn0011225	CG5695	jar	0.0075948	-1	-1	-1
FBgn0025639	CG13363	Suv4-20	0.0075947	-1	-1	0
FBgn0030360	CG1806	CG1806	0.0075923	0	0	0
FBgn0025637	CG16983	skpA	0.007589	0	0	0
FBgn0052576	CG32576	CG32576	0.0075852	0	0	0
FBgn0037206	CG12768	CG12768	0.007577	-1	-1	0
FBgn0250818	CG34360	CG34360	0.0075729	-1	-1	-1
FBgn0085484	CG34455	CG34455	0.0075625	-1	-1	-1
FBgn0033048	CG7881	CG7881	0.0075581	0	0	0
FBgn0030733	CG3560	CG3560	0.0075492	-1	-1	-1
FBgn0037847	CG6584	SelR	0.0075448	-1	1	1	Yes	BDGP
FBgn0032210	CG5603	CYLD	0.007539	-1	-1	0
FBgn0020518	CR32907	snoRNA:Me28S-G764	0.0075288	-1	-1	-1
FBgn0001247	CG5517	Ide	0.0074794	-1	-1	-1
FBgn0034180	CG15609	CG15609	0.007476	-1	-1	-1
FBgn0002526	CG10236	LanA	0.0074694	0	0	0
FBgn0037848	CG4591	Tsp86D	0.0074656	-1	-1	-1
FBgn0013984	CG18402	InR	0.0074643	-1	-1	-1
FBgn0011571	CG3606	caz	0.0074627	0	0	0
FBgn0037659	CG11033	CG11033	0.0074418	-1	-1	-1
FBgn0046834	CR32958	mir-1	0.0074375	-1	-1	-1
FBgn0026875	CG3638	CG3638	0.0074318	-1	-1	-1
FBgn0026160	CG7958	tna	0.0074316	-1	-1	0
FBgn0030389	CG15927	CG15927	0.0074311	-1	-1	-1
FBgn0037439	CG10286	CG10286	0.0074243	-1	0	0
FBgn0016917	CG4257	Stat92E	0.0074177	-1	-1	0
FBgn0003501	CG7524	Src64B	0.007411	-1	0	0
FBgn0053097	CG42724	CG42724	0.0073955	-1	0	0
FBgn0051800	CG31800	CG31800	0.007394	-1	-1	-1
FBgn0086442	CG17492	mib2	0.0073726	-1	-1	-1
FBgn0050281	CG30281	CG30281	0.0073644	0	0	0
FBgn0017397	CG10293	how	0.0073499	-1	1	1	Yes	BDGP
FBgn0037705	CG9381	mura	0.0073413	0	0	0
FBgn0260722	CR42549	CR42549	0.0073413	-1	-1	-1
FBgn0030858	CG8211	CG8211	0.0073349	-1	-1	-1
FBgn0040759	CG13177	CG13177	0.0073117	-1	-1	-1
FBgn0000439	CG2189	Dfd	0.0073007	-1	-1	-1
FBgn0015778	CG9412	rin	0.0072873	0	0	0
FBgn0051720	CG31720	CG31720	0.0072783	-1	-1	-1
FBgn0086023	CR34652	snoRNA:Me28S-A2589a	0.0072648	-1	-1	-1
FBgn0031037	CG14207	HspB8	0.0072636	-1	1	1	Yes	BDGP
FBgn0011259	CG18405	Sema-1a	0.0072603	-1	-1	-1
FBgn0259170	CG42275	alpha-Man-I	0.0072322	-1	-1	-1
FBgn0001104	CG10060	G-ialpha65A	0.0072315	0	0	0
FBgn0034897	CG11299	CG11299	0.0072277	0	0	0
FBgn0038364	CG4699	CG4699	0.0072189	-1	-1	-1
FBgn0050254	CR30254	tRNA:CR30254	0.0072088	-1	-1	-1
FBgn0001090	CG7088	bnb	0.007208	0	0	0
FBgn0039379	CG5886	CG5886	0.0072023	-1	0	0
FBgn0052549	CG32549	CG32549	0.0071991	-1	0	0
FBgn0033715	CG8490	CG8490	0.0071977	0	0	0
FBgn0031011	CG8034	CG8034	0.007196	0	0	0
FBgn0028954	CG3287	CG3287	0.0071925	-1	0	0
FBgn0001234	CR31400	Hsromega	0.0071872	-1	-1	-1
FBgn0053798	CG33798	CG33798	0.0071847	-1	-1	-1
FBgn0025574	CG5212	Pli	0.007183	-1	-1	-1
FBgn0260746	CG3132	Ect3	0.0071738	-1	-1	-1
FBgn0003984	CG10491	vn	0.0071718	-1	-1	-1
FBgn0003200	CG3000	rap	0.007129	0	0	0
FBgn0028579	CG3268	phtf	0.007129	-1	0	0
FBgn0031820	CG9537	DLP	0.0071284	-1	-1	-1
FBgn0020257	CG9952	ppa	0.0071255	-1	0	0
FBgn0017581	CG17342	Lk6	0.0071238	-1	-1	-1
FBgn0038296	CG6752	CG6752	0.0071144	0	0	0
FBgn0011204	CG12086	cue	0.0070784	-1	-1	-1
FBgn0011638	CG10922	La	0.007076	-1	1	1	Yes	BDGP
FBgn0010909	CG16973	msn	0.0070603	-1	-1	-1
FBgn0050251	CR30251	tRNA:CR30251	0.0070548	-1	-1	-1
FBgn0011915	CR30255	tRNA:M2:48Ba	0.0070531	-1	-1	-1
FBgn0011706	CG4319	rpr	0.0070431	-1	-1	0
FBgn0035100	CG7051	CG7051	0.0070366	0	0	0
FBgn0035954	CG5093	Doc3	0.0070243	0	0	0
FBgn0085257	CG34228	CG34228	0.0070177	-1	-1	-1
FBgn0003209	CG12437	raw	0.007011	-1	-1	-1
FBgn0010415	CG10497	Sdc	0.0070096	-1	1	1	Yes	BDGP
FBgn0037707	CG16788	RnpS1	0.0070036	-1	0	0
FBgn0030701	CG16952	CG16952	0.0069955	0	0	0
FBgn0004373	CG7004	fwd	0.0069944	-1	-1	-1
FBgn0033421	CG1888	CG1888	0.0069937	-1	-1	-1
FBgn0034821	CG9876	CG9876	0.0069915	0	0	0
FBgn0011726	CG4254	tsr	0.0069744	-1	-1	-1
FBgn0051352	CG31352	CG31352	0.0069714	-1	-1	0
FBgn0025633	CG13366	CG13366	0.0069635	-1	-1	-1
FBgn0026369	CG15667	Sara	0.0069622	-1	-1	-1
FBgn0027936	CG10682	vih	0.0069595	0	0	0
FBgn0052767	CG32767	CG32767	0.0069583	0	0	-1
FBgn0028953	CG14478	CG14478	0.0069553	0	0	0
FBgn0026417	CG2525	Hus1-like	0.0069491	0	0	0
FBgn0002527	CG7123	LanB1	0.0069372	-1	-1	-1
FBgn0033639	CG9003	CG9003	0.006925	-1	-1	-1
FBgn0030292	CG11752	CG11752	0.0069245	-1	-1	-1
FBgn0003659	CG18350	Sxl	0.0069202	-1	-1	-1
FBgn0029529	CG13365	CG13365	0.0069145	0	0	0
FBgn0011573	CG12019	Cdc37	0.0069125	-1	-1	-1
FBgn0024232	CG18471	gprs	0.0069118	-1	-1	-1
FBgn0037280	CG1126	CG1126	0.0069025	-1	-1	-1
FBgn0053505	CG33505	U3-55K	0.0069022	-1	0	-1
FBgn0003716	CG14026	tkv	0.0068957	-1	0	0
FBgn0053506	CG33506	CG33506	0.0068936	-1	-1	-1
FBgn0036135	CG7636	mRpL2	0.006893	-1	0	0
FBgn0085430	CG34401	CG34401	0.0068892	-1	-1	-1
FBgn0024189	CG33141	sns	0.0068775	-1	-1	-1
FBgn0046827	CR33010	mir-14	0.0068682	-1	-1	-1
FBgn0250789	CG1977	alpha-Spec	0.006866	-1	-1	-1
FBgn0024510	CG32315	dlt	0.0068656	0	0	0
FBgn0034603	CG9480	Glycogenin	0.006859	-1	1	1	Yes	BDGP
FBgn0031812	CG9523	CG9523	0.006857	0	0	0
FBgn0030866	CG42684	CG42684	0.006856	-1	-1	-1
FBgn0013983	CG5576	imd	0.0068513	0	0	0
FBgn0243512	CG7850	puc	0.0068489	-1	-1	-1
FBgn0039335	CG5127	Vps33B	0.0068307	-1	-1	-1
FBgn0014467	CG6103	CrebB-17A	0.006828	-1	-1	-1
FBgn0028372	CG11025	isopeptidase-T-3	0.0068193	-1	-1	-1
FBgn0013733	CG18076	shot	0.0068024	-1	-1	-1
FBgn0033547	CG12935	CG12935	0.0067916	-1	-1	-1
FBgn0003963	CG2762	ush	0.006771	0	0	0
FBgn0032724	CG10428	CG10428	0.0067564	-1	1	1	Yes	BDGP
FBgn0000054	CG15845	Adf1	0.0067476	-1	0	0
FBgn0036476	CG6945	CG6945	0.0067425	0	0	0
FBgn0086600	CR33633	snoRNA:Psi18S-1347c	0.0067347	-1	-1	-1
FBgn0040505	CG8250	Alk	0.0067279	-1	-1	-1
FBgn0042185	CG18769	CG18769	0.0067177	0	0	0
FBgn0042650	CG32577	disco-r	0.0066975	-1	-1	-1
FBgn0086902	CG3696	kis	0.0066974	-1	-1	-1
FBgn0040602	CG14545	CG14545	0.0066916	0	0	0
FBgn0015949	CG9854	hrg	0.0066913	0	0	0
FBgn0001215	CG9983	Hrb98DE	0.0066888	0	0	0
FBgn0016694	CG17888	Pdp1	0.0066886	-1	-1	0
FBgn0052246	CG32246	CG32246	0.0066603	-1	-1	-1
FBgn0052772	CG32772	CG32772	0.0066501	-1	-1	0
FBgn0013272	CG5820	Gp150	0.0066488	0	0	0
FBgn0013955	CG3969	PR2	0.0066308	-1	0	0
FBgn0053967	CG33967	kibra	0.0066298	-1	-1	-1
FBgn0032482	CG5547	Pect	0.0066289	-1	-1	-1
FBgn0004108	CG9704	Nrt	0.0066133	-1	1	1	Yes	BDGP
FBgn0026173	CG5186	slim	0.0066128	-1	1	1	Yes	BDGP
FBgn0036382	CG13737	CG13737	0.006598	0	0	0
FBgn0002985	CG3851	odd	0.0065965	0	0	0
FBgn0003177	CG31349	pyd	0.0065964	-1	0	0
FBgn0030189	CG2909	CG2909	0.0065942	0	0	0
FBgn0038532	CG14322	CG14322	0.0065941	-1	-1	-1
FBgn0032723	CG18397	ssp3	0.0065864	-1	-1	-1
FBgn0034434	CG9811	Rgk1	0.0065843	-1	0	0
FBgn0260794	CG42574	CG42574	0.0065837	-1	-1	-1
FBgn0016038	CG17828	mod(r)	0.0065834	0	0	0
FBgn0010313	CG2530	corto	0.0065671	0	0	0
FBgn0003345	CG8544	sd	0.0065632	0	0	0
FBgn0033083	CG3189	Dpit47	0.0065597	-1	-1	-1
FBgn0010105	CG17943	comm	0.0065543	0	0	0
FBgn0004873	CG9325	hts	0.0065509	-1	-1	-1
FBgn0033638	CG9005	CG9005	0.0065425	-1	0	0
FBgn0086897	CG16901	sqd	0.0065414	-1	-1	-1
FBgn0036749	CG7460	CG7460	0.0065388	-1	-1	-1
FBgn0010452	CG11280	trn	0.0065317	0	0	0
FBgn0038363	CG18505	Acyp2	0.0065295	-1	-1	-1
FBgn0004390	CG6721	Gap1	0.0065288	-1	-1	-1
FBgn0086040	CR34669	snoRNA:Me28S-A3365	0.0065211	-1	-1	-1
FBgn0030499	CG11178	CG11178	0.0065184	-1	-1	0
FBgn0050202	CR30202	tRNA:CR30202	0.0065126	-1	-1	-1
FBgn0050394	CG30394	CG30394	0.006509	0	0	0
FBgn0000625	CG10488	eyg	0.006504	0	0	0
FBgn0004567	CG2939	slp2	0.0065019	1	1	1	In training set	BDGP
FBgn0041184	CG15154	Socs36E	0.00649	-1	-1	0
FBgn0250823	CG6963	gish	0.006489	-1	-1	-1
FBgn0036697	CG7725	rogdi	0.0064867	0	0	0
FBgn0040233	CG33694	cana	0.0064715	-1	-1	-1
FBgn0052831	CG33695	CG33695	0.0064715	-1	-1	-1
FBgn0027835	CG5170	Dp1	0.0064709	-1	0	0
FBgn0032297	CG17124	CG17124	0.0064643	1	1	1	In training set	BDGP
FBgn0033109	CG9446	coro	0.0064602	-1	0	0
FBgn0043364	CG4427	cbt	0.0064493	-1	0	0
FBgn0015805	CG7471	Rpd3	0.0064449	0	0	0
FBgn0026063	CG17216	KP78b	0.006443	-1	-1	-1
FBgn0026064	CG6715	KP78a	0.006443	-1	-1	-1
FBgn0013765	CG4832	cnn	0.0064425	-1	-1	-1
FBgn0029738	CG4068	CG4068	0.0064406	0	0	0
FBgn0023507	CG3835	CG3835	0.0064265	0	0	0
FBgn0036149	CG42671	CG42671	0.0064144	-1	-1	-1
FBgn0034013	CG8166	unc-5	0.0064006	-1	-1	-1
FBgn0053474	CG33474	CG33474	0.0063928	-1	-1	-1
FBgn0020306	CG9696	dom	0.0063871	-1	-1	-1
FBgn0031836	CG11050	CG11050	0.0063595	-1	-1	-1
FBgn0030790	CG4768	CG4768	0.0063498	-1	-1	-1
FBgn0030465	CG15743	CG15743	0.0063425	0	0	0
FBgn0032233	CG13140	dpr19	0.0063315	-1	-1	-1
FBgn0030482	CG1673	CG1673	0.0063281	0	0	0
FBgn0027865	CG6120	Tsp96F	0.0063277	-1	0	0
FBgn0039219	CG13630	CG13630	0.0063244	-1	-1	-1
FBgn0085407	CG34378	Pvf3	0.0063236	-1	-1	-1
FBgn0031079	CG11940	pico	0.0063177	-1	-1	-1
FBgn0034282	CG5784	Mapmodulin	0.0063165	-1	-1	0
FBgn0016977	CG18497	spen	0.006311	0	0	0
FBgn0036292	CG10646	CG10646	0.0063102	0	0	0
FBgn0013334	CG8884	Sap47	0.0063046	-1	-1	-1
FBgn0000246	CG17604	c(3)G	0.006303	-1	-1	-1
FBgn0035153	CG3371	CG3371	0.006298	-1	1	1	Yes	BDGP
FBgn0026758	CG18009	Trf2	0.0062887	-1	-1	-1
FBgn0051997	CG31997	CG31997	0.0062885	-1	-1	-1
FBgn0051635	CG31635	CG31635	0.0062826	0	0	0
FBgn0035152	CG3386	CG3386	0.0062819	-1	-1	0
FBgn0029943	CG1643	Atg5	0.0062808	0	0	0
FBgn0029996	CG2257	Ubc-E2H	0.0062694	-1	-1	-1
FBgn0011278	CG6545	lbe	0.0062687	-1	-1	-1
FBgn0022361	CG1507	Pur-alpha	0.0062659	0	0	0
FBgn0028397	CG9214	Tob	0.0062351	-1	-1	-1
FBgn0037186	CG11241	CG11241	0.0062341	0	0	0
FBgn0034251	CG11423	CG11423	0.0062288	-1	-1	-1
FBgn0037279	CG1129	CG1129	0.0062035	0	0	0
FBgn0033548	CG7637	CG7637	0.0061729	-1	-1	0
FBgn0029944	CG2079	Dok	0.006163	0	0	0
FBgn0027499	CG12340	wde	0.0061582	-1	-1	0
FBgn0020556	CR31273	bxd	0.0061556	-1	-1	-1
FBgn0011656	CG1429	Mef2	0.0061535	-1	1	1	Yes	BDGP
FBgn0031148	CG1753	CG1753	0.006143	0	0	0
FBgn0051815	CG31815	CG31815	0.0061424	-1	-1	-1
FBgn0031645	CG3036	CG3036	0.0061413	-1	0	0
FBgn0034135	CG4905	Syn2	0.0061386	0	0	0
FBgn0044047	CG14049	Ilp6	0.0061332	-1	-1	-1
FBgn0015513	CG10379	mbc	0.0061329	-1	0	0
FBgn0037504	CG1142	CG1142	0.0061224	-1	-1	-1
FBgn0260654	CG42636	Gyc76C	0.0061047	-1	-1	-1
FBgn0033549	CG12936	mms4	0.0061025	0	0	0
FBgn0025743	CG18582	mbt	0.0060885	-1	-1	-1
FBgn0004924	CG6146	Top1	0.0060879	-1	-1	-1
FBgn0004885	CG6863	tok	0.0060848	0	0	0
FBgn0000404	CG5940	CycA	0.0060826	-1	0	0
FBgn0003079	CG2845	phl	0.0060776	-1	0	0
FBgn0082957	CR34623	snoRNA:Psi28S-3405d	0.0060568	-1	-1	-1
FBgn0029764	CG3249	yu	0.0060519	-1	0	0
FBgn0004895	CG1132	fd64A	0.0060434	-1	-1	1	Yes	New BDGP
FBgn0003371	CG2621	sgg	0.0060285	0	0	0
FBgn0001230	CG5436	Hsp68	0.0060214	-1	-1	-1
FBgn0003118	CG17077	pnt	0.006016	-1	-1	-1
FBgn0002643	CG8118	mam	0.006015	-1	-1	-1
FBgn0067688	CR33620	mir-316	0.0059948	-1	-1	-1
FBgn0011219	CG31605	Bsg	0.0059914	-1	-1	-1
FBgn0026400	CG10009	Noa36	0.0059892	-1	0	0
FBgn0010241	CG8523	Mdr50	0.0059788	-1	-1	-1
FBgn0039120	CG10198	Nup98	0.0059754	-1	-1	-1
FBgn0037007	CG5059	CG5059	0.0059673	-1	1	1	Yes	BDGP
FBgn0010651	CG15095	l(2)08717	0.0059527	0	0	0
FBgn0037632	CG8351	Tcp-1eta	0.0059467	-1	-1	-1
FBgn0032481	CG16972	CG16972	0.0059389	-1	-1	-1
FBgn0013576	CG32464	l(3)82Fd	0.0059274	-1	0	0
FBgn0020249	CG7954	stck	0.0059264	-1	1	1	Yes	BDGP
FBgn0050011	CG30011	gem	0.0059246	-1	0	0
FBgn0003261	CG10279	Rm62	0.0059223	0	0	0
FBgn0004907	CG17870	14-3-3zeta	0.00592	-1	-1	-1
FBgn0026262	CG2009	bip2	0.0059176	0	0	0
FBgn0259735	CG42389	CG42389	0.0059155	-1	-1	-1
FBgn0030349	CG10353	CG10353	0.0059072	-1	-1	-1
FBgn0030299	CG11727	CG11727	0.0059046	0	0	0
FBgn0013726	CG8705	pnut	0.0058991	-1	-1	-1
FBgn0259936	CR32957	Uhg3	0.0058974	-1	-1	-1
FBgn0053303	CG33303	CG33303	0.0058972	-1	-1	-1
FBgn0003459	CG3836	stwl	0.005892	0	0	0
FBgn0011763	CG4654	Dp	0.0058898	-1	0	0
FBgn0051365	CG31365	CG31365	0.0058775	-1	0	0
FBgn0004419	CG4916	me31B	0.0058691	0	0	0
FBgn0024250	CG9653	brk	0.0058668	0	0	0
FBgn0027108	CG4590	inx2	0.0058335	0	0	0
FBgn0001170	CG11607	H2.0	0.0058271	1	1	1	In training set	BDGP
FBgn0023534	CG17778	CG17778	0.0058248	0	0	0
FBgn0033159	CG17800	Dscam	0.0058156	0	0	0
FBgn0028577	CG12085	pUf68	0.0058145	0	0	0
FBgn0031150	CG32513	bves	0.0058029	-1	-1	0
FBgn0053207	CG33207	pxb	0.0057979	0	0	0
FBgn0041005	CR33941	pncr013:4	0.0057978	-1	-1	-1
FBgn0031842	CG11098	Tango1	0.0057955	-1	-1	-1
FBgn0039938	CG11153	Sox102F	0.0057939	0	0	0
FBgn0033166	CG11166	Eaf	0.0057825	0	0	0
FBgn0039178	CG6356	CG6356	0.0057773	-1	-1	-1
FBgn0036144	CG6207	GlcAT-P	0.0057748	-1	0	0
FBgn0039000	CG6954	CG6954	0.0057714	-1	-1	0
FBgn0033539	CG16728	Git	0.0057693	-1	-1	1	Yes	New BDGP
FBgn0035424	CG11505	CG11505	0.0057692	-1	-1	-1
FBgn0030350	CG1844	SelG	0.0057632	-1	-1	-1
FBgn0052406	CG32406	CG32406	0.0057605	0	0	0
FBgn0033374	CG13741	CG13741	0.0057573	0	0	0
FBgn0003053	CG12212	peb	0.0057564	0	0	0
FBgn0085384	CG34355	CG34355	0.0057508	-1	-1	-1
FBgn0030930	CG6394	GalNAc-T2	0.0057492	0	0	0
FBgn0000308	CG9553	chic	0.0057343	-1	-1	-1
FBgn0004132	CG30498	boca	0.0057326	-1	-1	0
FBgn0040091	CG4414	Ugt58Fa	0.0057214	1	1	1	In training set	BDGP
FBgn0085424	CG34395	nub	0.0057129	-1	-1	-1
FBgn0004859	CG2125	ci	0.0057036	0	0	0
FBgn0003463	CG9224	sog	0.0056999	0	0	0
FBgn0028978	CG5408	trbl	0.0056883	-1	0	0
FBgn0037743	CG8412	CG8412	0.0056871	-1	-1	-1
FBgn0030931	CG6318	Rad51D	0.0056834	-1	-1	-1
FBgn0082932	CR34565	snoRNA:Me28S-G1083d	0.0056739	-1	-1	-1
FBgn0034091	CG8448	mrj	0.0056735	-1	-1	-1
FBgn0035542	CG11347	CG11347	0.0056715	-1	1	1	Yes	BDGP
FBgn0038660	CG14291	CG14291	0.0056673	0	0	0
FBgn0025549	CG1659	unc-119	0.0056635	0	0	0
FBgn0015773	CG18657	NetA	0.0056558	1	1	1	In training set	BDGP
FBgn0012000	CR31500	tRNA:V3b:84Dc	0.0056519	-1	-1	-1
FBgn0011953	CR32610	tRNA:R:12Ef	0.0056477	-1	-1	-1
FBgn0035226	CG1009	Psa	0.005647	0	0	0
FBgn0035917	CG6416	Zasp66	0.0056467	0	0	0
FBgn0259933	CG42456	CG42456	0.0056357	-1	-1	-1
FBgn0035436	CG12016	CG12016	0.0056225	0	0	0
FBgn0014037	CG32217	Su(Tpl)	0.005621	-1	-1	-1
FBgn0028554	CG10203	xl6	0.0056184	-1	-1	0
FBgn0002609	CG8346	HLHm3	0.0056169	-1	-1	-1
FBgn0039139	CG5933	CG5933	0.005613	-1	-1	0
FBgn0259832	CG34229	CG34229	0.0056026	-1	-1	-1
FBgn0028974	CG32562	xmas-2	0.0056017	-1	-1	-1
FBgn0038202	CG12402	CG12402	0.0056012	-1	-1	-1
FBgn0033194	CG2093	Vps13	0.005601	-1	-1	-1
FBgn0036398	CG9007	CG9007	0.0055944	-1	-1	0
FBgn0041160	CG7554	comm2	0.0055836	0	0	0
FBgn0008654	CG3905	Su(z)2	0.0055706	-1	-1	-1
FBgn0051812	CG31812	CG31812	0.0055692	-1	-1	-1
FBgn0033373	CG8080	CG8080	0.0055677	-1	-1	0
FBgn0037710	CG9393	CG9393	0.0055643	0	0	0
FBgn0020647	CG5405	KrT95D	0.0055628	-1	1	1	Yes	BDGP
FBgn0002945	CG11614	nkd	0.0055602	-1	-1	-1
FBgn0030049	CG11265	Trf4-1	0.0055575	-1	-1	-1
FBgn0082938	CR34587	snoRNA:Me28S-C2645a	0.0055566	-1	-1	-1
FBgn0023479	CG4821	Tequila	0.0055558	-1	-1	-1
FBgn0036815	CG6874	HipHop	0.005554	-1	-1	-1
FBgn0032399	CG6785	CG6785	0.0055538	-1	-1	-1
FBgn0036695	CG7853	Papst2	0.0055527	-1	-1	-1
FBgn0053229	CG33229	CG33229	0.0055494	0	0	0
FBgn0003862	CG8651	trx	0.0055484	-1	0	0
FBgn0004838	CG10377	Hrb27C	0.0055463	0	0	0
FBgn0259744	CG42377	CG42377	0.0055443	-1	-1	-1
FBgn0003016	CG3479	osp	0.0055421	0	0	0
FBgn0260457	CR42862	CR42862	0.0055339	-1	-1	-1
FBgn0025355	CG7869	SuUR	0.0055332	-1	0	0
FBgn0050015	CG30015	CG30015	0.0055323	-1	-1	-1
FBgn0086347	CG7438	Myo31DF	0.0055315	-1	-1	-1
FBgn0025803	CG17299	SNF4Agamma	0.0055282	-1	-1	0
FBgn0052075	CG32075	CG32075	0.0055282	-1	-1	-1
FBgn0039790	CG2246	CG2246	0.005528	-1	0	0
FBgn0064122	CG33691	CG33691	0.0055238	-1	-1	-1
FBgn0064121	CG33692	CG33692	0.0055238	-1	-1	-1
FBgn0003888	CG3401	betaTub60D	0.0055201	0	0	0
FBgn0033688	CG8877	Prp8	0.0055182	-1	-1	-1
FBgn0032524	CG9267	CG9267	0.0055161	-1	0	0
FBgn0032919	CG9253	CG9253	0.0055138	-1	0	0
FBgn0052076	CG32076	Alg10	0.0055085	0	0	0
FBgn0028670	CG18617	Vha100-2	0.0055085	-1	-1	0
FBgn0034210	CG6568	CG6568	0.0055072	0	0	0
FBgn0035656	CG10479	CG10479	0.0054978	-1	1	1	Yes	BDGP
FBgn0044323	CG7392	Cka	0.0054923	-1	-1	0
FBgn0039350	CG17383	jigr1	0.0054902	-1	-1	0
FBgn0002732	CG8337	malpha	0.0054881	-1	-1	-1
FBgn0003031	CG5119	pAbp	0.005485	0	0	0
FBgn0033846	CG6061	mip120	0.0054806	-1	-1	-1
FBgn0030873	CG15814	CG15814	0.0054746	0	0	0
FBgn0030874	CG6506	CG6506	0.0054746	0	0	0
FBgn0031384	CG4238	CG4238	0.0054733	-1	-1	-1
FBgn0250753	CG2922	exba	0.0054694	-1	-1	-1
FBgn0004889	CG6235	tws	0.0054584	-1	-1	-1
FBgn0025702	CG11489	srpk79D	0.005457	-1	-1	0
FBgn0011747	CG1651	Ank	0.0054537	-1	-1	-1
FBgn0020299	CG31317	stumps	0.0054522	1	1	1	In training set	BDGP
FBgn0037533	CG2791	CD98hc	0.0054505	-1	0	0
FBgn0052043	CG32043	CG32043	0.0054504	-1	0	0
FBgn0028399	CG4672	TMS1	0.0054502	-1	0	0
FBgn0033540	CG11887	Elp2	0.005444	0	0	0
FBgn0031869	CG18304	CG18304	0.0054411	-1	-1	-1
FBgn0025186	CG5709	ari-2	0.0054379	-1	-1	-1
FBgn0050466	CG30466	CG30466	0.0054343	-1	-1	-1
FBgn0000405	CG3510	CycB	0.005434	0	0	0
FBgn0033987	CG12424	CG12424	0.0054326	0	0	0
FBgn0040284	CG6987	SF2	0.005429	0	0	0
FBgn0083006	CR34531	snoRNA:Psi28S-1153	0.0054202	-1	-1	-1
FBgn0260232	CG42506	CG42506	0.0054145	-1	-1	-1
FBgn0052541	CG32541	CG32541	0.0054145	-1	-1	-1
FBgn0034724	CG3624	CG3624	0.0054106	0	0	0
FBgn0037715	CG9399	CG9399	0.0054068	0	0	0
FBgn0067779	CG11371	dbr	0.005396	-1	-1	-1
FBgn0051523	CG31523	CG31523	0.0053932	0	0	0
FBgn0051782	CG31782	CG31782	0.0053893	0	0	0
FBgn0082960	CR34618	snoRNA:Psi28S-3405a	0.0053883	-1	-1	-1
FBgn0034873	CG5360	mi	0.005387	-1	-1	-1
FBgn0038244	CG7987	CG7987	0.0053823	-1	0	0
FBgn0036662	CG9706	CG9706	0.0053765	0	0	0
FBgn0011860	CR31945	tRNA:G3:22BCb	0.0053754	-1	-1	-1
FBgn0035640	CG17498	mad2	0.0053698	-1	0	0
FBgn0003300	CG1849	run	0.005369	0	0	0
FBgn0013762	CG8203	Cdk5	0.0053648	-1	-1	-1
FBgn0031717	CG6957	Oscillin	0.0053641	0	0	0
FBgn0035767	CG8596	CG8596	0.0053632	0	0	0
FBgn0030717	CG8931	CG8931	0.0053631	0	0	0
FBgn0051163	CG31163	SKIP	0.0053566	-1	-1	0
FBgn0030970	CG7326	CG7326	0.0053502	0	0	0
FBgn0043853	CR32863	snoRNA:MeU5-C46	0.0053447	-1	-1	-1
FBgn0035416	CG17569	gry	0.0053439	-1	-1	-1
FBgn0050497	CG30497	CG30497	0.00534	0	0	0
FBgn0014001	CG10295	Pak	0.0053305	-1	-1	-1
FBgn0030291	CG1738	CG1738	0.0053282	0	0	0
FBgn0030771	CG13011	sing	0.005328	0	0	0
FBgn0011655	CG1775	Med	0.0053242	-1	-1	-1
FBgn0003866	CG1374	tsh	0.0053241	0	0	0
FBgn0040070	CG31884	Trx-2	0.0053212	-1	-1	-1
FBgn0011566	CG13761	Bzd	0.0053188	-1	-1	-1
FBgn0047135	CG32276	CG32276	0.0053161	-1	0	0
FBgn0022960	CG3572	vimar	0.0053132	-1	1	1	Yes	BDGP
FBgn0037742	CG9475	Rpt3R	0.0053089	-1	-1	-1
FBgn0036237	CG18593	viaf	0.0053057	-1	0	0
FBgn0011202	CG1768	dia	0.0052998	-1	-1	-1
FBgn0004449	CG5723	Ten-m	0.0052911	-1	-1	-1
FBgn0033122	CG17002	CG17002	0.0052909	0	0	0
FBgn0005695	CG8411	gcl	0.0052853	0	0	0
FBgn0053523	CG33523	CG33523	0.0052843	-1	-1	-1
FBgn0034379	CG15073	CG15073	0.0052831	-1	-1	0
FBgn0036534	CG6169	Dcp2	0.0052752	0	0	0
FBgn0011984	CR31951	tRNA:S7:23Ea	0.0052722	-1	-1	-1
FBgn0038058	CG5608	CG5608	0.0052701	-1	-1	-1
FBgn0082937	CR34588	snoRNA:Me28S-C2645b	0.0052693	-1	-1	-1
FBgn0082933	CR34564	snoRNA:Me28S-G1083c	0.005269	-1	-1	-1
FBgn0000146	CG6137	aub	0.0052689	-1	-1	-1
FBgn0000463	CG3619	Dl	0.0052684	-1	0	0
FBgn0029975	CG1444	CG1444	0.0052674	-1	0	0
FBgn0023130	CG3771	a6	0.005267	0	0	0
FBgn0029002	CG18321	miple2	0.0052537	-1	0	0
FBgn0005511	CG6634	mid	0.0052515	-1	-1	-1
FBgn0028388	CG33979	capt	0.0052513	-1	0	0
FBgn0053522	CG33522	scaf6	0.0052451	0	0	-1
FBgn0030294	CG11750	CG11750	0.0052408	0	0	0
FBgn0035435	CG12077	CG12077	0.0052407	-1	-1	-1
FBgn0037471	CG1070	Alh	0.0052356	-1	0	0
FBgn0035273	CG12020	CG12020	0.0052333	-1	-1	-1
FBgn0040297	CG9256	Nhe2	0.005232	0	0	0
FBgn0036133	CG7638	CG7638	0.0052318	-1	1	1	Yes	BDGP
FBgn0034618	CG9485	CG9485	0.0052293	-1	-1	-1
FBgn0031662	CG3792	CG3792	0.0052292	0	0	0
FBgn0004654	CG3724	Pgd	0.0052282	-1	-1	0
FBgn0260863	CG8228	Vps45	0.0052281	-1	-1	-1
FBgn0036126	CG6272	CG6272	0.005227	0	0	0
FBgn0038251	CG3508	CG3508	0.0052258	-1	-1	-1
FBgn0047178	CG32147	CG32147	0.0052221	0	0	0
FBgn0001219	CG4264	Hsc70-4	0.0052201	0	0	0
FBgn0017453	CG5215	Zn72D	0.0052133	-1	0	0
FBgn0085372	CG42589	sick	0.0052094	-1	-1	-1
FBgn0259100	CG42248	CG42248	0.0052062	-1	-1	-1
FBgn0004638	CG6033	drk	0.0052043	-1	0	0
FBgn0250867	CG42238	CG42238	0.0052041	-1	-1	-1
FBgn0031516	CG9663	CG9663	0.0052038	-1	0	0
FBgn0036650	CG3971	Baldspot	0.0052036	0	0	0
FBgn0035158	CG13895	CG13895	0.0052014	-1	-1	-1
FBgn0038418	CG10309	pad	0.0051858	-1	-1	-1
FBgn0030039	CG12123	CG12123	0.0051767	-1	-1	-1
FBgn0025866	CG8107	CalpB	0.005169	-1	1	1	Yes	BDGP
FBgn0022764	CG8815	Sin3A	0.005167	-1	-1	0
FBgn0082976	CR34619	snoRNA:Psi28S-3305a	0.0051559	-1	-1	-1
FBgn0036405	CG6833	CG6833	0.0051553	0	0	0
FBgn0028983	CG10913	Spn6	0.0051548	0	0	0
FBgn0015286	CG2849	Rala	0.0051497	0	0	0
FBgn0051522	CG31522	CG31522	0.0051474	0	0	0
FBgn0040688	CG12483	CG12483	0.0051384	0	0	0
FBgn0085442	CG34413	NKAIN	0.0051378	-1	-1	-1
FBgn0037606	CG8032	CG8032	0.0051353	0	0	0
FBgn0005771	CG4491	noc	0.0051338	1	1	1	In training set	BDGP
FBgn0026575	CG32575	hang	0.0051318	-1	0	0
FBgn0038780	CG5060	CG5060	0.0051297	0	0	-1
FBgn0031969	CG7228	pes	0.0051219	0	0	0
FBgn0031187	CG14619	CG14619	0.005115	-1	-1	0
FBgn0032845	CG10747	CG10747	0.0051137	-1	-1	-1
FBgn0003567	CG8573	su(Hw)	0.0051135	-1	-1	1	Yes	New BDGP
FBgn0033636	CG10897	tou	0.0051119	0	0	0
FBgn0033259	CG11210	CG11210	0.0051057	0	0	0
FBgn0033845	CG17064	mars	0.0051005	-1	0	0
FBgn0040071	CG6889	tara	0.0051005	-1	0	0
FBgn0000723	CG8874	Fps85D	0.0050959	-1	-1	0
FBgn0032261	CG6094	CG6094	0.0050887	0	0	0
FBgn0026533	CG5935	Dek	0.0050857	-1	-1	0
FBgn0015754	CG8440	Lis-1	0.0050827	0	0	0
FBgn0001202	CG10653	hk	0.0050782	0	0	0
FBgn0003950	CG1501	unc	0.0050716	-1	-1	-1
FBgn0031643	CG3008	CG3008	0.0050707	-1	0	0
FBgn0035346	CG1146	CG1146	0.0050679	0	0	0
FBgn0036397	CG8783	CG8783	0.0050672	-1	-1	-1
FBgn0040232	CG6392	cmet	0.0050619	-1	-1	-1
FBgn0259168	CG42273	mnb	0.0050618	-1	-1	-1
FBgn0015222	CG2216	Fer1HCH	0.0050608	-1	0	0
FBgn0085339	CG34310	CG34310	0.0050589	-1	-1	-1
FBgn0037566	CG7494	mRpL1	0.0050479	-1	0	0
FBgn0259749	CG9535	mmy	0.0050479	-1	-1	-1
FBgn0031313	CG5080	CG5080	0.0050451	1	1	1	In training set	BDGP
FBgn0004167	CG12008	kst	0.0050425	1	1	1	In training set	BDGP
FBgn0031312	CG4775	Tango14	0.0050394	-1	-1	-1
FBgn0052280	CG32280	CG32280	0.0050378	-1	-1	-1
FBgn0036423	CG3919	CG3919	0.0050366	-1	-1	0
FBgn0030114	CG17754	CG17754	0.0050354	0	0	0
FBgn0031713	CG7277	CG7277	0.0050332	-1	0	0
FBgn0031661	CG8890	Gmd	0.0050312	-1	-1	0
FBgn0003475	CG10076	spir	0.0050253	0	0	0
FBgn0054008	CG34008	CG34008	0.0050253	-1	-1	-1
FBgn0039266	CG11791	CG11791	0.0050249	-1	0	0
FBgn0259934	CG42457	CG42457	0.0050236	-1	-1	-1
FBgn0015372	CG3870	chrw	0.0050221	-1	-1	0
FBgn0041171	CG15010	ago	0.0050199	-1	-1	-1
FBgn0052369	CG32369	CG32369	0.0050193	0	0	0
FBgn0027932	CG13388	Akap200	0.005018	0	0	0
FBgn0001624	CG1725	dlg1	0.0050179	-1	-1	-1
FBgn0040268	CG10123	Top3alpha	0.005017	-1	-1	-1
FBgn0086757	CG4840	cbs	0.0050159	-1	-1	-1
FBgn0040283	CG6057	SMC1	0.0050134	-1	-1	0
FBgn0022959	CG5654	yps	0.0050127	-1	-1	-1
FBgn0259165	CG42684	CG42684	0.005008	-1	-1	-1
FBgn0011836	CG6711	Taf2	0.0050027	-1	-1	0
FBgn0054012	CG34012	CG34012	0.0049948	-1	-1	-1
FBgn0019660	CR32665	roX2	0.0049943	-1	-1	-1
FBgn0000173	CG18319	ben	0.0049939	-1	-1	1	Yes	New BDGP
FBgn0037719	CG9424	bocksbeutel	0.0049885	-1	-1	0
FBgn0050193	CG42678	CG42678	0.0049871	-1	1	1	Yes	BDGP
FBgn0050190	CG42678	CG42678	0.0049871	-1	-1	-1
FBgn0036287	CG10663	CG10663	0.004985	-1	-1	-1
FBgn0037513	CG3027	pyd3	0.0049816	0	0	0
FBgn0082936	CR34589	snoRNA:Me28S-C2645c	0.0049799	-1	-1	-1
FBgn0004607	CG1449	zfh2	0.0049764	0	0	0
FBgn0030894	CG7192	CG7192	0.0049678	-1	-1	-1
FBgn0037347	CG1427	CG1427	0.0049636	-1	-1	-1
FBgn0023215	CG13316	Mnt	0.0049613	0	0	0
FBgn0003448	CG3956	sna	0.0049607	0	0	0
FBgn0030813	CG4949	CG4949	0.0049587	0	0	0
FBgn0029983	CG42593	CG42593	0.0049574	-1	-1	-1
FBgn0031458	CG2855	aph-1	0.0049568	-1	-1	-1
FBgn0053993	CG33993	CG33993	0.00495	-1	-1	-1
FBgn0031057	CG14224	Ubqn	0.0049439	0	0	0
FBgn0004644	CG4637	hh	0.0049417	-1	-1	-1
FBgn0036127	CG7828	APP-BP1	0.0049407	-1	-1	-1
FBgn0052176	CG32176	CG32176	0.0049375	-1	0	0
FBgn0030870	CG6398	CG6398	0.0049326	-1	0	0
FBgn0082585	CG30023	sprt	0.0049305	-1	-1	-1
FBgn0038387	CG5268	blp	0.0049304	-1	0	0
FBgn0035500	CG14998	ens	0.004929	-1	-1	-1
FBgn0030048	CG12112	CG12112	0.0049285	-1	-1	-1
FBgn0039751	CG1983	CG1983	0.0049278	-1	-1	-1
FBgn0001981	CG3758	esg	0.0049242	-1	-1	0
FBgn0002525	CG6944	Lam	0.0049204	0	0	0
FBgn0051944	CR31944	tRNA:CR31944	0.0049198	-1	-1	-1
FBgn0016693	CG6148	Past1	0.0049162	-1	0	0
FBgn0003090	CG11084	pk	0.0049144	-1	-1	-1
FBgn0011764	CG12223	Dsp1	0.0049123	0	0	0
FBgn0030505	CG11172	NFAT	0.0049103	0	0	0
FBgn0259228	CG42328	C3G	0.0049092	-1	-1	-1
FBgn0000179	CG3578	bi	0.0049083	0	0	-1
FBgn0003884	CG1913	alphaTub84B	0.0049061	-1	-1	-1
FBgn0082959	CR34620	snoRNA:Psi28S-3405b	0.0049055	-1	-1	-1
FBgn0035965	CG14181	Use1	0.0049036	-1	-1	-1
FBgn0032884	CG9324	Pomp	0.0049028	0	0	0
FBgn0001994	CG7664	crp	0.0048973	0	0	0
FBgn0052970	CG42677	wb	0.0048869	-1	-1	-1
FBgn0022131	CG42783	aPKC	0.0048855	-1	-1	-1
FBgn0083054	CR34544	snoRNA:Psi18S-1347a	0.0048773	-1	-1	-1
FBgn0243505	CG32717	sdt	0.0048743	-1	-1	-1
FBgn0033092	CG9422	CG9422	0.0048735	-1	-1	-1
FBgn0024273	CG1520	WASp	0.0048725	0	0	0
FBgn0085432	CG34403	pan	0.0048705	-1	-1	-1
FBgn0036165	CG7533	chrb	0.0048696	-1	0	0
FBgn0085435	CG34406	CG34406	0.0048692	-1	-1	-1
FBgn0005585	CG9429	Crc	0.0048686	-1	-1	0
FBgn0002441	CG5954	l(3)mbt	0.0048667	-1	-1	-1
FBgn0029800	CG15929	lin-52	0.0048667	-1	-1	-1
FBgn0000286	CG11924	Cf2	0.004862	0	0	0
FBgn0032223	CG5034	GATAd	0.0048618	-1	-1	0
FBgn0011739	CG12072	wts	0.0048611	-1	-1	-1
FBgn0086053	CR34682	snoRNA:Me18S-G1358a	0.0048585	-1	-1	-1
FBgn0014362	CG7437	mub	0.0048536	0	0	0
FBgn0001254	CG1934	ImpE2	0.0048527	0	0	0
FBgn0005612	CG3090	Sox14	0.0048524	-1	-1	0
FBgn0027572	CG5009	CG5009	0.0048488	-1	-1	0
FBgn0014343	CG10601	mirr	0.0048462	-1	-1	-1
FBgn0259217	CG42317	Csk	0.0048457	-1	-1	-1
FBgn0020240	CG7586	Mcr	0.0048434	-1	-1	-1
FBgn0259730	CG42384	tal-1A	0.0048416	-1	-1	-1
FBgn0259731	CG42385	tal-2A	0.0048416	-1	-1	-1
FBgn0259732	CG42386	tal-3A	0.0048416	-1	-1	-1
FBgn0259733	CG42387	tal-AA	0.0048416	-1	-1	-1
FBgn0033781	CG13319	CG13319	0.0048321	-1	-1	0
FBgn0039532	CG5588	Mtl	0.0048318	-1	1	1	Yes	BDGP
FBgn0033258	CG8712	CG8712	0.0048284	0	0	0
FBgn0036484	CG6859	CG6859	0.0048281	0	0	0
FBgn0013753	CG7959	Bgb	0.0048236	0	0	0
FBgn0000181	CG3644	bic	0.0048236	-1	0	0
FBgn0022073	CG8846	Thor	0.0048233	0	0	0
FBgn0034617	CG9754	CG9754	0.0048131	0	0	0
FBgn0016926	CG4710	Pino	0.0048116	-1	-1	-1
FBgn0010389	CG7223	htl	0.0048112	1	1	1	In training set	BDGP
FBgn0043903	CG14226	dome	0.0048087	-1	-1	-1
FBgn0036250	CG17152	Ir68b	0.0048061	-1	-1	-1
FBgn0033089	CG17266	CG17266	0.0048057	-1	-1	-1
FBgn0024330	CG9473	MED6	0.0048047	-1	-1	0
FBgn0036581	CG5057	MED10	0.0048009	-1	-1	-1
FBgn0004101	CG3411	bs	0.0047999	-1	-1	0
FBgn0086041	CR34670	snoRNA:Me18S-A469	0.0047998	-1	-1	-1
FBgn0015221	CG1469	Fer2LCH	0.0047977	-1	0	0
FBgn0036580	CG13072	PDCD-5	0.0047976	-1	1	1	Yes	BDGP
FBgn0020910	CG4863	RpL3	0.0047976	-1	0	0
FBgn0034088	CG8445	calypso	0.0047963	0	0	0
FBgn0025800	CG2262	Smox	0.004792	-1	-1	1	Yes	New BDGP
FBgn0000163	CG5055	baz	0.0047899	-1	-1	-1
FBgn0033188	CG1600	CG1600	0.0047895	-1	0	0
FBgn0034089	CG8446	CG8446	0.0047875	-1	0	0
FBgn0029820	CG16721	CG16721	0.0047861	0	0	0
FBgn0051957	CG31957	CG31957	0.0047831	-1	-1	-1
FBgn0029959	CG12156	Rab39	0.0047822	0	0	0
FBgn0041342	CG1049	Cct1	0.0047783	0	0	0
FBgn0260642	CG1028	Antp	0.004774	-1	-1	-1
FBgn0023172	CG9635	RhoGEF2	0.0047735	-1	-1	-1
FBgn0036846	CG6818	MESR6	0.004773	0	0	0
FBgn0015777	CG9261	nrv2	0.0047726	0	0	0
FBgn0036000	CG3434	CG3434	0.0047718	-1	0	0
FBgn0036317	CG10948	CG10948	0.0047671	-1	-1	-1
FBgn0029067	CG1696	l(1)G0269	0.004767	-1	-1	0
FBgn0030789	CG9606	Rrp45	0.004757	-1	0	0
FBgn0037878	CG6693	CG6693	0.0047569	0	0	0
FBgn0026409	CG4994	Mpcp	0.0047565	-1	0	0
FBgn0031174	CG1486	CG1486	0.0047563	0	0	0
FBgn0029819	CG3016	CG3016	0.0047554	-1	-1	0
FBgn0038386	CG5478	CG5478	0.004755	0	0	0
FBgn0039923	CG1793	MED26	0.0047501	0	0	0
FBgn0000490	CG9885	dpp	0.0047479	-1	-1	-1
FBgn0000289	CG8367	cg	0.0047469	-1	-1	-1
FBgn0040777	CG14767	CG14767	0.0047443	-1	-1	0
FBgn0031077	CG15618	CG15618	0.004744	-1	-1	-1
FBgn0036929	CG7668	CG7668	0.0047435	-1	-1	-1
FBgn0003997	CG5123	W	0.0047425	0	0	0
FBgn0037117	CG11248	CG11248	0.004741	0	0	0
FBgn0002524	CG4162	lace	0.0047402	0	0	0
FBgn0037720	CG8312	CG8312	0.0047384	0	0	0
FBgn0011013	CG2245	nero	0.0047371	-1	-1	0
FBgn0040230	CG6224	dbo	0.0047355	0	0	0
FBgn0029903	CG4532	pod1	0.0047303	-1	0	0
FBgn0000416	CG12070	Sap-r	0.0047295	-1	-1	0
FBgn0052425	CG32425	CG32425	0.004729	0	0	0
FBgn0038890	CG7956	CG7956	0.0047279	-1	-1	-1
FBgn0052174	CG32174	CG32174	0.0047275	-1	-1	-1
FBgn0027321	CG3125	CG3125	0.0047258	-1	-1	-1
FBgn0000233	CG12653	btd	0.0047203	0	0	0
FBgn0024191	CG7238	sip1	0.0047169	0	0	0
FBgn0036318	CG11009	CG11009	0.0047168	-1	-1	-1
FBgn0004363	CG6647	porin	0.004712	-1	0	0
FBgn0026375	CG32555	RhoGAPp190	0.0047089	0	0	0
FBgn0003444	CG11561	smo	0.0047074	0	0	0
FBgn0038194	CG3050	Cyp6d5	0.0047066	0	0	0
FBgn0030329	CG1837	prtp	0.0047044	-1	0	0
FBgn0034376	CG42856	CG42856	0.0047035	-1	-1	-1
FBgn0036510	CG7427	CG7427	0.0047027	-1	-1	0
FBgn0035407	CG14962	CG14962	0.0046967	-1	-1	0
FBgn0010316	CG1772	dap	0.0046965	0	0	-1
FBgn0002528	CG3322	LanB2	0.0046935	-1	-1	-1
FBgn0031186	CG14614	CG14614	0.0046929	-1	-1	-1
FBgn0039355	CG4730	CG4730	0.0046889	-1	-1	0
FBgn0051999	CG31999	CG31999	0.0046885	0	0	0
FBgn0022349	CG1910	CG1910	0.0046877	-1	0	0
FBgn0052573	CG32573	CG32573	0.004686	0	0	0
FBgn0260238	CG42512	CG42512	0.004686	-1	-1	-1
FBgn0260433	CG42512	CG42512	0.004686	-1	-1	-1
FBgn0033182	CG1621	CG1621	0.004685	0	0	0
FBgn0027088	CG6778	Aats-gly	0.0046829	-1	-1	0
FBgn0024238	CG8649	Fim	0.0046818	-1	-1	-1
FBgn0023214	CG15085	edl	0.0046813	-1	-1	0
FBgn0022029	CG4798	l(2)k01209	0.0046812	-1	-1	0
FBgn0035113	CG17142	pyx	0.0046777	-1	-1	-1
FBgn0016081	CG32045	fry	0.004677	-1	-1	-1
FBgn0001325	CG3340	Kr	0.004676	0	0	0
FBgn0033310	CG8643	rgr	0.0046757	-1	-1	0
FBgn0032961	CG1416	CG1416	0.0046739	-1	0	0
FBgn0259214	CG42314	PMCA	0.0046707	-1	-1	-1
FBgn0028734	CG6203	Fmr1	0.0046705	0	0	0
FBgn0045035	CG6535	tefu	0.0046702	-1	-1	-1
FBgn0003520	CG5753	stau	0.0046685	0	0	0
FBgn0030217	CG2124	CG2124	0.0046657	-1	-1	-1
FBgn0038877	CG3308	CG3308	0.004665	-1	-1	-1
FBgn0036489	CG7011	CG7011	0.0046618	0	0	0
FBgn0033486	CG11866	CG11866	0.0046614	-1	-1	-1
FBgn0036696	CG14057	CG14057	0.0046609	-1	-1	-1
FBgn0030731	CG3415	CG3415	0.0046591	-1	-1	-1
FBgn0259750	CG4807	ab	0.0046569	-1	-1	-1
FBgn0039356	CG5039	CG5039	0.0046551	-1	-1	-1
FBgn0260049	CG10724	flr	0.0046492	-1	-1	-1
FBgn0014189	CG7269	Hel25E	0.0046488	-1	0	0
FBgn0023444	CG4063	ebi	0.0046484	0	0	0
FBgn0015024	CG2028	CkIalpha	0.004647	0	0	0
FBgn0015567	CG4260	alpha-Adaptin	0.0046429	-1	-1	-1
FBgn0037116	CG7158	CG7158	0.0046399	-1	-1	-1
FBgn0051044	CR31044	CR31044	0.0046383	0	0	-1
FBgn0036007	CG3424	path	0.0046362	-1	0	0
FBgn0032846	CG10721	CG10721	0.0046336	-1	-1	-1
FBgn0035247	CG13929	metl	0.0046334	0	0	0
FBgn0259743	CG42378	RhoGEF3	0.0046326	-1	-1	-1
FBgn0086691	CG15261	UK114	0.0046322	-1	-1	-1
FBgn0035044	CG3663	CG3663	0.0046296	-1	-1	1	Yes	New BDGP
FBgn0024753	CG32593	Flo-2	0.0046278	0	0	0
FBgn0052210	CG32210	CG32210	0.0046222	-1	-1	-1
FBgn0034475	CG13874	Obp56h	0.0046197	-1	-1	-1
FBgn0038769	CG10889	CG10889	0.0046176	-1	-1	0
FBgn0004855	CG3284	RpII15	0.0046144	-1	-1	-1
FBgn0032821	CG10538	CdGAPr	0.0046142	-1	-1	-1
FBgn0030749	CG9968	Anxb11	0.0046119	0	0	0
FBgn0019886	CG4589	Letm1	0.0046103	0	0	0
FBgn0086855	CG17078	CG17078	0.004609	-1	-1	-1
FBgn0083053	CR34545	snoRNA:Psi18S-1347b	0.0046049	-1	-1	-1
FBgn0053325	CG33325	CG33325	0.0045988	-1	-1	-1
FBgn0047114	CG31142	CG31142	0.004598	0	0	0
FBgn0029933	CG14425	CG14425	0.0045967	-1	-1	-1
FBgn0030480	CG1660	Tim9a	0.0045908	-1	-1	-1
FBgn0033907	CG8338	mRpS16	0.0045868	-1	-1	0
FBgn0030073	CG10962	CG10962	0.0045864	0	0	1	Yes	New BDGP
FBgn0033917	CG8503	CG8503	0.0045831	-1	0	0
FBgn0041203	CG1848	LIMK1	0.0045796	-1	-1	0
FBgn0086447	CG10685	l(2)37Cg	0.0045707	-1	-1	-1
FBgn0010225	CG1106	Gel	0.0045684	1	1	1	In training set	BDGP
FBgn0031500	CG17221	CG17221	0.004566	0	0	0
FBgn0039776	CG31022	PH4alphaEFB	0.004562	0	0	0
FBgn0025681	CG3558	CG3558	0.0045614	-1	-1	0
FBgn0021767	CG11202	org-1	0.0045606	1	1	1	In training set	BDGP
FBgn0036886	CG9300	CG9300	0.0045596	-1	0	0
FBgn0050383	CG30383	CG30383	0.004557	-1	-1	-1
FBgn0000250	CG5848	cact	0.0045566	-1	-1	0
FBgn0085279	CG34250	CG34250	0.0045528	-1	-1	-1
FBgn0041087	CG8805	wun2	0.0045522	-1	-1	-1
FBgn0010660	CG3820	Nup214	0.0045491	-1	-1	-1
FBgn0019650	CG11186	toy	0.0045418	0	0	0
FBgn0050499	CG30499	CG30499	0.0045392	0	0	0
FBgn0031732	CG11149	CG11149	0.0045389	0	0	0
FBgn0010265	CG13389	RpS13	0.0045332	0	0	0
FBgn0036028	CG16717	CG16717	0.0045305	-1	-1	-1
FBgn0040096	CG16834	lectin-33A	0.0045303	-1	-1	-1
FBgn0003013	CG7467	osa	0.0045274	-1	-1	-1
FBgn0028990	CG11331	Spn27A	0.0045237	0	0	0
FBgn0050463	CG30463	CG30463	0.0045217	-1	-1	-1
FBgn0010315	CG9096	CycD	0.0045198	-1	-1	0
FBgn0082958	CR34621	snoRNA:Psi28S-3405c	0.0045194	-1	-1	-1
FBgn0029503	CG6198	CHORD	0.0045171	0	0	0
FBgn0027581	CG6191	CG6191	0.0045164	-1	-1	-1
FBgn0039182	CG5728	CG5728	0.0045158	-1	0	0
FBgn0027601	CG9009	CG9009	0.0045117	-1	0	0
FBgn0000709	CG1484	fliI	0.0045106	0	0	0
FBgn0053936	CG33936	CG33936	0.0045072	-1	-1	-1
FBgn0042174	CR18854	CR18854	0.0045069	-1	0	0
FBgn0082582	CG1539	tmod	0.0045008	-1	-1	-1
FBgn0003292	CG6097	rt	0.0044994	-1	-1	-1
FBgn0051211	CG31211	CG31211	0.004496	-1	-1	-1
FBgn0020493	CG5201	Dad	0.0044954	-1	-1	-1
FBgn0029798	CG4078	CG4078	0.0044905	-1	0	0
FBgn0034967	CG3186	eIF-5A	0.0044888	0	0	0
FBgn0031457	CG3077	CG3077	0.0044887	0	0	0
FBgn0022224	CG3450	ubl	0.0044875	-1	-1	-1
FBgn0029881	CG3973	pigs	0.004487	0	0	0
FBgn0030628	CG9114	CG9114	0.0044838	0	0	0
FBgn0034321	CG14502	CG14502	0.0044829	0	0	0
FBgn0034322	CG18536	CG18536	0.0044815	-1	-1	-1
FBgn0027579	CG5508	CG5508	0.0044805	0	0	0
FBgn0030328	CG2446	Amun	0.0044769	-1	-1	-1
FBgn0085378	CG34349	CG34349	0.004475	-1	-1	-1
FBgn0010280	CG5444	Taf4	0.004475	-1	-1	-1
FBgn0031040	CG14210	CG14210	0.0044687	-1	-1	-1
FBgn0012049	CG11494	BtbVII	0.0044672	0	0	0
FBgn0014863	CG1019	Mlp84B	0.0044658	0	0	0
FBgn0031365	CG17650	CG17650	0.0044593	-1	-1	-1
FBgn0000228	CG14025	Bsg25D	0.0044576	-1	0	0
FBgn0086679	CG9770	p	0.0044563	-1	-1	-1
FBgn0004579	CG6464	salm	0.0044534	-1	-1	-1
FBgn0011769	CG4205	Fdxh	0.0044532	-1	-1	-1
FBgn0031684	CG8680	CG8680	0.0044522	-1	-1	-1
FBgn0029693	CG6379	CG6379	0.0044442	-1	-1	-1
FBgn0010387	CG8627	Dbi	0.004442	0	0	0
FBgn0033529	CG17765	CG17765	0.0044373	-1	0	0
FBgn0032600	CG17912	CG17912	0.0044314	-1	-1	0
FBgn0042641	CG3874	frc	0.0044312	0	0	0
FBgn0036509	CG7739	CG7739	0.0044285	0	0	0
FBgn0067339	CR33560	mir-2c	0.0044268	-1	-1	-1
FBgn0259984	CG7147	kuz	0.0044242	-1	-1	-1
FBgn0243513	CG17262	cnir	0.004423	-1	-1	-1
FBgn0037760	CG9461	FBX011	0.004421	0	0	0
FBgn0010830	CG11238	l(3)04053	0.0044188	-1	0	0
FBgn0031314	CG4785	CG4785	0.0044182	0	0	0
FBgn0034142	CG8306	CG8306	0.0044181	0	0	0
FBgn0000259	CG15224	CkIIbeta	0.0044134	-1	-1	-1
FBgn0023388	CG1099	Dap160	0.0044113	0	0	0
FBgn0004888	CG1065	Scsalpha	0.0044112	-1	-1	-1
FBgn0038735	CG4662	CG4662	0.0044074	-1	-1	-1
FBgn0025809	CG8962	Paf-AHalpha	0.0044061	0	0	0
FBgn0032665	CG15152	CG15152	0.0044024	-1	-1	-1
FBgn0039183	CG6413	Dis3	0.0044014	-1	-1	-1
FBgn0033528	CG11761	trsn	0.0044004	0	0	0
FBgn0037926	CG10535	Elp1	0.0043999	-1	0	0
FBgn0030479	CG1987	Rbp1-like	0.0043973	0	0	0
FBgn0039531	CG5611	CG5611	0.0043905	-1	-1	-1
FBgn0039752	CG15530	CG15530	0.0043891	-1	-1	-1
FBgn0001206	CG1619	Hmr	0.0043867	-1	-1	-1
FBgn0036319	CG11010	Ent3	0.0043807	-1	-1	-1
FBgn0033677	CG8321	CG8321	0.0043709	0	0	0
FBgn0002989	CG3736	okr	0.0043698	0	0	0
FBgn0260648	CG31938	Rrp40	0.0043654	-1	-1	-1
FBgn0005777	CG8402	PpD3	0.0043628	-1	0	0
FBgn0005694	CG5683	Aef1	0.0043568	0	0	0
FBgn0035133	CG1228	Ptpmeg	0.0043495	0	0	0
FBgn0039127	CG13602	CG13602	0.0043476	0	0	0
FBgn0052477	CR42862	CR42862	0.0043456	0	0	0
FBgn0030504	CG2691	CG2691	0.0043449	-1	-1	-1
FBgn0051111	CG31111	CG31111	0.004341	-1	-1	-1
FBgn0086055	CR34684	snoRNA:Me18S-C1096	0.0043408	-1	-1	-1
FBgn0052590	CG32590	CG32590	0.0043397	-1	-1	-1
FBgn0040318	CG13475	HGTX	0.0043394	0	0	0
FBgn0010825	CG6964	Gug	0.004339	0	0	0
FBgn0052313	CG32313	CG32313	0.0043388	-1	-1	-1
FBgn0030351	CG1840	CG1840	0.0043379	-1	-1	-1
FBgn0029801	CG15771	CG15771	0.0043373	-1	-1	-1
FBgn0034634	CG10494	CG10494	0.0043365	0	0	0
FBgn0052666	CG32666	CG32666	0.0043332	0	0	0
FBgn0053178	CG33178	CG33178	0.0043325	0	0	0
FBgn0020307	CG5799	dve	0.0043309	0	0	0
FBgn0032870	CG2608	CG2608	0.0043285	0	0	0
FBgn0026428	CG6170	HDAC6	0.0043259	0	0	0
FBgn0031676	CG14040	CG14040	0.0043258	-1	-1	-1
FBgn0031895	CG4497	CG4497	0.0043242	-1	1	1	Yes	BDGP
FBgn0003392	CG18102	shi	0.0043219	-1	-1	-1
FBgn0041094	CG7590	scyl	0.0043207	-1	-1	-1
FBgn0035094	CG9380	CG9380	0.0043184	-1	-1	-1
FBgn0030672	CG9281	CG9281	0.0043126	-1	0	0
FBgn0030716	CG9170	CG9170	0.0043097	0	0	0
FBgn0087035	CG7439	AGO2	0.004309	-1	-1	-1
FBgn0053200	CG33200	ventrally-expressed-protein-D	0.004308	-1	-1	-1
FBgn0001316	CG17046	klar	0.0043038	-1	-1	-1
FBgn0029957	CG12155	CG12155	0.0043007	0	0	0
FBgn0020621	CG2049	Pkn	0.004297	-1	-1	-1
FBgn0001323	CG4761	knrl	0.004296	0	0	0
FBgn0032149	CG4036	CG4036	0.0042937	-1	-1	-1
FBgn0039802	CG1349	dj-1beta	0.0042905	0	0	0
FBgn0028369	CG3653	kirre	0.0042887	-1	-1	-1
FBgn0029694	CG15375	CG15375	0.0042878	-1	-1	-1
FBgn0030616	CG9091	RpL37a	0.0042849	-1	-1	-1
FBgn0036999	CG5976	CG5976	0.0042834	-1	-1	-1
FBgn0016054	CG2488	phr6-4	0.0042818	0	0	0
FBgn0000576	CG2988	ems	0.0042789	-1	-1	-1
FBgn0015763	CG12244	lic	0.0042783	0	0	0
FBgn0004103	CG5650	Pp1-87B	0.004278	-1	-1	-1
FBgn0030692	CG8470	mRpS30	0.0042756	-1	0	0
FBgn0003923	CR32878	snRNA:U2:38ABb	0.0042747	-1	-1	-1
FBgn0016031	CG10645	lama	0.0042705	-1	-1	-1
FBgn0032363	CG6509	CG6509	0.0042683	-1	-1	-1
FBgn0250839	CG2016	CG2016	0.004266	-1	-1	-1
FBgn0033274	CG14757	CG14757	0.004265	-1	-1	-1
FBgn0030743	CG9921	CG9921	0.0042633	0	0	0
FBgn0023537	CG17896	CG17896	0.0042629	0	0	0
FBgn0034751	CG3751	RpS24	0.004262	-1	-1	-1
FBgn0043070	CG15669	MESK2	0.0042618	0	0	0
FBgn0086686	CG7832	l(3)L1231	0.0042581	-1	-1	-1
FBgn0259734	CG42388	CG42388	0.0042565	-1	-1	-1
FBgn0260485	CG42388	CG42388	0.0042565	-1	-1	-1
FBgn0053977	CG33977	CG33977	0.0042563	-1	-1	-1
FBgn0003285	CG4125	rst	0.0042521	0	0	0
FBgn0051612	CG31612	CG31612	0.00425	-1	-1	0
FBgn0032609	CG13280	CG13280	0.0042409	-1	-1	-1
FBgn0082975	CR34622	snoRNA:Psi28S-3305b	0.0042373	-1	-1	-1
FBgn0045063	CG8824	fdl	0.0042366	-1	-1	-1
FBgn0038501	CG5319	lute	0.0042346	-1	-1	0
FBgn0034965	CG13568	CG13568	0.0042339	-1	-1	-1
FBgn0035181	CG9205	CG9205	0.0042318	-1	-1	0
FBgn0052457	CG32457	CG32457	0.0042256	-1	-1	-1
FBgn0086779	CG11628	step	0.0042227	-1	-1	-1
FBgn0028386	CG5067	cic	0.004222	-1	-1	-1
FBgn0035896	CG6983	CG6983	0.0042123	-1	-1	0
FBgn0015558	CG1693	tty	0.0042107	-1	-1	-1
FBgn0082180	CR33566	mir-13aS	0.0042036	-1	-1	-1
FBgn0029175	CG8433	Ext2	0.004203	-1	-1	0
FBgn0034081	CG10731	CG10731	0.004203	-1	-1	-1
FBgn0037188	CG7369	CG7369	0.0042013	0	0	-1
FBgn0039831	CG12054	CG12054	0.004199	0	0	0
FBgn0002734	CG8328	HLHmdelta	0.004196	-1	-1	0
FBgn0033859	CG6197	CG6197	0.0041941	-1	-1	-1
FBgn0027842	CG12891	whd	0.0041919	-1	-1	-1
FBgn0052529	CG32529	CG32529	0.0041913	-1	-1	-1
FBgn0010395	CG1762	betaInt-nu	0.0041912	0	0	0
FBgn0051109	CG31109	CG31109	0.0041908	0	0	0
FBgn0016715	CG3200	Reg-2	0.0041834	-1	-1	1	Yes	BDGP
FBgn0034741	CG4269	CG4269	0.0041822	-1	-1	-1
FBgn0052268	CG32268	dro6	0.0041809	-1	-1	-1
FBgn0035402	CG12082	CG12082	0.0041795	-1	0	0
FBgn0010349	CG7507	Dhc64C	0.0041759	-1	-1	-1
FBgn0003082	CG11205	phr	0.0041732	-1	-1	-1
FBgn0036356	CG10222	CG10222	0.0041718	-1	-1	-1
FBgn0014184	CG16747	Oda	0.0041704	0	0	0
FBgn0040079	CG4132	pkaap	0.0041694	-1	-1	-1
FBgn0034631	CG10496	CG10496	0.0041629	-1	-1	-1
FBgn0260940	CG6637	lsn	0.0041625	-1	-1	-1
FBgn0022724	CG7128	Taf8	0.0041603	0	0	0
FBgn0031359	CG18317	CG18317	0.0041559	0	0	0
FBgn0046830	CR32931	mir-13a	0.0041518	-1	-1	-1
FBgn0259185	CG42289	Ir60b	0.004151	-1	-1	-1
FBgn0004839	CG8967	otk	0.0041502	-1	-1	-1
FBgn0040319	CG2259	Gclc	0.0041478	0	0	0
FBgn0033485	CG1381	RpLP0-like	0.0041477	-1	0	0
FBgn0003575	CG6222	su(s)	0.004147	-1	-1	-1
FBgn0030838	CG5445	CG5445	0.0041419	0	0	0
FBgn0051122	CG31122	CG31122	0.0041292	0	0	0
FBgn0033309	CG8735	CG8735	0.0041221	-1	-1	-1
FBgn0040384	CG32795	CG32795	0.0041214	-1	-1	-1
FBgn0033777	CG17574	CG17574	0.0041212	0	0	0
FBgn0029958	CG12151	Pdp	0.0041199	-1	0	0
FBgn0259705	CG42359	CG42359	0.0041116	-1	-1	-1
FBgn0259704	CG42358	CG42358	0.0041116	-1	-1	-1
FBgn0032688	CG15160	CG15160	0.0041097	0	0	0
FBgn0004598	CG18734	Fur2	0.004109	-1	-1	-1
FBgn0031696	CG14030	Bub1	0.0041041	0	0	0
FBgn0040660	CG13551	CG13551	0.0041029	-1	0	0
FBgn0037327	CG2087	PEK	0.0041016	-1	0	0
FBgn0034062	CG8388	CG8388	0.0040987	0	0	0
FBgn0051710	CG31710	CG31710	0.0040955	-1	-1	-1
FBgn0003890	CG4869	betaTub97EF	0.0040953	-1	-1	-1
FBgn0082974	CR34624	snoRNA:Psi28S-3305c	0.0040939	-1	-1	-1
FBgn0032599	CG13277	LSm7	0.0040929	0	0	0
FBgn0027949	CG10364	msb1l	0.0040877	0	0	0
FBgn0032595	CG17996	CG17996	0.0040866	-1	-1	-1
FBgn0030809	CG9086	CG9086	0.004086	-1	-1	-1
FBgn0037081	CG6049	CG6049	0.0040848	0	0	0
FBgn0035151	CG17129	CG17129	0.0040847	0	0	0
FBgn0035140	CG17180	CG17180	0.0040794	-1	-1	-1
FBgn0000394	CG12410	cv	0.0040782	0	0	0
FBgn0001085	CG17697	fz	0.0040759	-1	-1	-1
FBgn0053963	CR33963	CR33963	0.0040757	-1	-1	-1
FBgn0038424	CG17565	CG17565	0.0040706	0	0	0
FBgn0004893	CG10021	bowl	0.004056	0	0	0
FBgn0031006	CG8002	rictor	0.0040543	-1	-1	-1
FBgn0028835	CG42522	CSN8	0.0040534	-1	-1	0
FBgn0024277	CG18214	trio	0.0040508	-1	-1	-1
FBgn0032435	CG6417	Oatp33Eb	0.0040468	0	0	0
FBgn0039505	CG5934	CG5934	0.0040463	0	0	0
FBgn0022023	CG9124	eIF-3p40	0.0040451	0	0	0
FBgn0083068	CR33947	pncr011:3L	0.0040451	-1	-1	-1
FBgn0031972	CG7221	Wwox	0.0040447	0	0	0
FBgn0032434	CG5421	CG5421	0.00404	-1	-1	-1
FBgn0024251	CG1414	bbx	0.0040395	-1	-1	0
FBgn0011746	CG8084	ana	0.0040342	-1	-1	-1
FBgn0030812	CG8949	CG8949	0.0040317	-1	-1	-1
FBgn0036376	CG10743	CG10743	0.0040279	-1	-1	-1
FBgn0039207	CG5789	CG5789	0.0040238	-1	-1	-1
FBgn0037723	CG8327	SpdS	0.0040178	0	0	0
FBgn0042133	CG18810	CG18810	0.0040144	-1	-1	-1
FBgn0085443	CG34414	spri	0.0040138	-1	-1	-1
FBgn0034948	CG3825	CG3825	0.0040123	0	0	0
FBgn0037739	CG12948	CG12948	0.0040121	-1	-1	-1
FBgn0016078	CG8804	wun	0.0040101	1	1	1	In training set	BDGP
FBgn0027569	CG7207	cert	0.0040087	0	0	0
FBgn0026086	CG12598	Adar	0.0040073	-1	-1	-1
FBgn0015269	CG8318	Nf1	0.003999	-1	-1	-1
FBgn0050118	CG30118	CG30118	0.0039989	-1	0	0
FBgn0004364	CG8896	18w	0.0039977	-1	-1	-1
FBgn0002631	CG6096	HLHm5	0.0039911	0	0	0
FBgn0036449	CG5295	bmm	0.0039908	-1	1	1	Yes	BDGP
FBgn0015721	CG9398	king-tubby	0.0039897	-1	-1	-1
FBgn0016756	CG5486	Ubp64E	0.0039836	-1	1	1	Yes	BDGP
FBgn0052675	CG32675	Tango5	0.0039833	-1	-1	-1
FBgn0026189	CG7740	prominin-like	0.0039818	-1	-1	-1
FBgn0037261	CG9775	CG9775	0.0039818	-1	-1	-1
FBgn0050163	CG30163	Cpr60D	0.0039772	-1	-1	-1
FBgn0046829	CR32933	mir-13b-1	0.0039743	-1	-1	-1
FBgn0038220	CG12207	CG12207	0.003971	0	0	0
FBgn0086056	CR34685	snoRNA:Me18S-A425	0.0039556	-1	-1	-1
FBgn0050115	CG30115	CG30115	0.0039523	0	0	0
FBgn0020381	CG7486	Dredd	0.0039518	0	0	0
FBgn0000117	CG11579	arm	0.0039509	0	0	0
FBgn0039492	CG6051	CG6051	0.0039483	0	0	0
FBgn0041161	CG6451	blue	0.0039455	-1	-1	-1
FBgn0014002	CG6988	Pdi	0.003945	0	0	0
FBgn0259221	CG42321	CG42321	0.0039436	-1	-1	-1
FBgn0087008	CG12238	e(y)3	0.003941	-1	-1	-1
FBgn0030638	CG11655	CG11655	0.0039359	0	0	0
FBgn0030955	CG6891	CG6891	0.0039298	-1	-1	1	Yes	BDGP
FBgn0032394	CG6746	CG6746	0.0039282	-1	-1	0
FBgn0034365	CG5335	CG5335	0.0039261	-1	-1	-1
FBgn0260934	CG8201	par-1	0.0039261	-1	-1	-1
FBgn0032822	CG10466	CG10466	0.0039218	-1	-1	-1
FBgn0013277	CG31449	Hsp70Ba	0.0039193	-1	-1	-1
FBgn0036891	CG9372	CG9372	0.0039184	0	0	0
FBgn0030641	CG6299	CG6299	0.0039143	-1	-1	-1
FBgn0030640	CG6294	CG6294	0.0039116	-1	-1	-1
FBgn0026620	CG9765	tacc	0.0039098	-1	-1	-1
FBgn0032364	CG4970	CG4970	0.0039033	-1	-1	-1
FBgn0086558	CG32744	Ubi-p5E	0.0039	-1	-1	-1
FBgn0030300	CG1747	Sk1	0.0038998	0	0	0
FBgn0041111	CG8817	lilli	0.003899	0	0	0
FBgn0033383	CG8057	alc	0.0038973	-1	-1	-1
FBgn0086785	CG10711	Vps36	0.0038931	-1	-1	-1
FBgn0001122	CG2204	G-oalpha47A	0.0038927	-1	1	1	Yes	BDGP
FBgn0260431	CG42526	CG42526	0.0038916	-1	-1	-1
FBgn0011837	CG4070	Tis11	0.0038909	-1	-1	-1
FBgn0031998	CG8451	CG8451	0.0038908	0	0	0
FBgn0039907	CG2041	lgs	0.0038867	0	0	0
FBgn0004368	CG6899	Ptp4E	0.0038865	-1	1	1	Yes	BDGP
FBgn0035415	CG14966	CG14966	0.0038853	-1	-1	-1
FBgn0053983	CG33983	obst-H	0.0038754	-1	-1	-1
FBgn0020277	CG8807	lush	0.0038699	-1	-1	-1
FBgn0010470	CG9847	Fkbp13	0.0038685	0	0	0
FBgn0031161	CG15445	CG15445	0.0038653	0	0	0
FBgn0064191	CR33559	ban	0.0038646	-1	-1	-1
FBgn0016041	CG12157	Tom40	0.0038609	-1	0	0
FBgn0033988	CG7761	pcs	0.0038597	-1	-1	0
FBgn0036450	CG13472	CG13472	0.0038594	0	0	0
FBgn0027553	CG32721	NELF-B	0.0038584	0	0	0
FBgn0034476	CG8595	Toll-7	0.0038521	0	0	0
FBgn0030706	CG8909	CG8909	0.0038511	0	0	0
FBgn0025740	CG17245	plexB	0.0038437	-1	-1	-1
FBgn0001250	CG9623	if	0.0038424	-1	-1	-1
FBgn0036921	CG7823	RhoGDI	0.0038379	-1	1	1	Yes	BDGP
FBgn0034087	CG8443	CG8443	0.003834	-1	0	0
FBgn0027492	CG5643	wdb	0.0038289	-1	-1	-1
FBgn0031698	CG14023	CG14023	0.0038288	-1	-1	-1
FBgn0011206	CG4760	bol	0.0038252	-1	-1	-1
FBgn0013997	CG6827	Nrx-IV	0.0038187	-1	-1	-1
FBgn0051291	CG31291	CG31291	0.0038178	0	0	0
FBgn0259978	CG8390	vlc	0.0038164	-1	-1	-1
FBgn0010303	CG4353	hep	0.00381	-1	-1	-1
FBgn0052264	CG32264	CG32264	0.0038096	0	0	0
FBgn0250861	CG42236	RanBPM	0.0038082	-1	-1	-1
FBgn0260486	CG42533	CG42533	0.0038074	-1	-1	-1
FBgn0027508	CG4719	tankyrase	0.0038072	-1	-1	-1
FBgn0035147	CG12030	CG12030	0.0038046	0	0	0
FBgn0037818	CG6465	CG6465	0.0038042	0	0	0
FBgn0037552	CG7800	CG7800	0.0038022	-1	-1	-1
FBgn0085397	CG34368	Fili	0.0038015	-1	-1	-1
FBgn0086133	CG3861	kdn	0.0037745	-1	-1	-1
FBgn0033313	CG8639	Cirl	0.0037711	-1	-1	-1
FBgn0000479	CG32498	dnc	0.0037664	0	0	0
FBgn0029525	CG18273	CG18273	0.0037655	-1	0	-1
FBgn0039218	CG13628	Rpb10	0.003763	-1	-1	-1
FBgn0004359	CG5507	T48	0.0037616	0	0	0
FBgn0030673	CG15601	CG15601	0.0037602	-1	-1	0
FBgn0035099	CG6845	CG6845	0.0037561	-1	-1	-1
FBgn0051694	CG31694	CG31694	0.0037522	-1	-1	0
FBgn0000636	CG5803	Fas3	0.0037503	1	1	1	In training set	BDGP
FBgn0028789	CG5133	Doc1	0.0037465	0	0	0
FBgn0002891	CG1925	mus205	0.0037462	-1	-1	-1
FBgn0052732	CG32732	CG32732	0.0037458	-1	-1	-1
FBgn0032673	CG7180	CG7180	0.0037401	0	0	0
FBgn0000542	CG2904	ec	0.0037379	-1	-1	-1
FBgn0032940	CG18362	Mio	0.0037377	-1	0	0
FBgn0044324	CG10712	Chro	0.0037319	-1	-1	-1
FBgn0027564	CG3149	CG3149	0.0037271	-1	-1	-1
FBgn0002783	CG18740	mor	0.003727	-1	0	0
FBgn0037645	CG11966	CG11966	0.0037265	0	0	0
FBgn0011224	CG31000	heph	0.0037226	0	0	0
FBgn0028552	CG3988	gammaSnap	0.0037195	0	0	0
FBgn0086357	CG9539	Sec61alpha	0.0037158	-1	-1	-1
FBgn0037749	CG9471	CG9471	0.0037092	-1	-1	-1
FBgn0000075	CG10501	amd	0.0037033	-1	-1	-1
FBgn0005640	CG10579	Eip63E	0.0037025	0	0	0
FBgn0004391	CG9198	shtd	0.0036983	-1	-1	0
FBgn0023526	CG2865	CG2865	0.0036897	0	0	0
FBgn0030235	CG1691	Imp	0.0036894	0	0	0
FBgn0026376	CG8865	Rgl	0.0036893	0	0	0
FBgn0038045	CG5232	Sas	0.0036843	-1	-1	-1
FBgn0003137	CG33103	Ppn	0.0036757	-1	-1	-1
FBgn0029629	CG8636	CG8636	0.0036712	-1	1	1	Yes	BDGP
FBgn0025111	CG1683	Ant2	0.0036703	-1	-1	-1
FBgn0035517	CG1265	CG1265	0.0036702	-1	-1	-1
FBgn0039859	CG11539	CG11539	0.0036692	-1	-1	-1
FBgn0002873	CG12047	mud	0.003669	-1	-1	-1
FBgn0031036	CG14220	CG14220	0.0036666	-1	-1	-1
FBgn0036900	CG8765	CG8765	0.0036593	-1	-1	0
FBgn0024182	CG1410	waw	0.0036552	-1	-1	-1
FBgn0023519	CG3109	mRpL16	0.0036452	-1	0	0
FBgn0038419	CG14879	CG14879	0.0036426	0	0	0
FBgn0000577	CG9015	en	0.0036414	0	0	0
FBgn0033716	CG8493	Den1	0.0036393	-1	-1	-1
FBgn0023536	CG3156	CG3156	0.0036389	-1	-1	0
FBgn0000042	CG4027	Act5C	0.0036295	-1	0	0
FBgn0035021	CG4622	CG4622	0.0036259	0	0	0
FBgn0035388	CG2162	CG2162	0.0036224	0	0	0
FBgn0041789	CG31794	Pax	0.0036206	-1	0	0
FBgn0003178	CG7070	PyK	0.003613	-1	0	0
FBgn0032078	CG9520	C1GalTA	0.0036117	0	0	0
FBgn0040305	CG3743	MTF-1	0.00361	-1	0	0
FBgn0025674	CG15218	CycK	0.0036076	0	0	0
FBgn0031373	CG15358	CG15358	0.0036039	-1	-1	-1
FBgn0085275	CG34246	CG34246	0.0036015	-1	-1	-1
FBgn0004892	CG3242	sob	0.0036012	-1	0	0
FBgn0003360	CG16944	sesB	0.0035997	0	0	0
FBgn0037262	CG1057	MED31	0.0035987	0	0	0
FBgn0037263	CG18271	CG18271	0.0035987	-1	-1	-1
FBgn0029114	CG6890	Tollo	0.0035847	-1	-1	-1
FBgn0001091	CG12055	Gapdh1	0.0035842	-1	0	0
FBgn0014020	CG8416	Rho1	0.0035805	-1	0	0
FBgn0032819	CG10463	CG10463	0.0035739	-1	-1	-1
FBgn0032883	CG9323	CG9323	0.0035687	0	0	0
FBgn0014963	CG42803	gpp	0.0035668	-1	-1	-1
FBgn0028955	CG8788	CG8788	0.0035617	-1	-1	1	Yes	BDGP
FBgn0037008	CG5047	mTerf3	0.0035586	0	0	0
FBgn0000253	CG8472	Cam	0.0035507	-1	0	0
FBgn0004863	CG7937	C15	0.0035476	-1	-1	-1
FBgn0011672	CG3671	Mvl	0.003544	0	0	0
FBgn0053995	CG33995	CG33995	0.0035428	-1	-1	-1
FBgn0031674	CG31919	CG31919	0.0035428	-1	-1	-1
FBgn0037202	CG11115	Ssl1	0.0035425	0	0	0
FBgn0000459	CG9908	disco	0.0035346	0	0	0
FBgn0025684	CG15438	CG15438	0.0035335	-1	-1	-1
FBgn0016794	CG1044	dos	0.0035232	-1	-1	-1
FBgn0052393	CG42799	dikar	0.0035187	0	0	0
FBgn0015624	CG15319	nej	0.0035178	-1	-1	-1
FBgn0036998	CG5969	CG5969	0.0035135	-1	-1	0
FBgn0036816	CG3979	Indy	0.0035121	-1	0	0
FBgn0034966	CG13563	CG13563	0.0035099	-1	-1	-1
FBgn0020304	CG3365	drongo	0.0035094	-1	0	0
FBgn0036125	CG6279	CG6279	0.0035067	-1	-1	-1
FBgn0031971	CG7224	CG7224	0.0035058	0	0	0
FBgn0025631	CG4322	moody	0.0035056	0	0	0
FBgn0036920	CG8004	CG8004	0.0034996	-1	-1	-1
FBgn0052813	CG32813	CG32813	0.0034987	1	1	1	In training set	BDGP
FBgn0034366	CG5489	Atg7	0.0034949	-1	-1	-1
FBgn0038621	CG10864	CG10864	0.0034947	-1	-1	-1
FBgn0034933	CG3735	CG3735	0.0034927	-1	-1	-1
FBgn0027095	CG7013	Manf	0.0034885	0	0	0
FBgn0003150	CG9327	Pros29	0.0034777	-1	-1	-1
FBgn0011754	CG1830	PhKgamma	0.0034646	-1	0	0
FBgn0033029	CG8426	l(2)NC136	0.0034584	-1	-1	-1
FBgn0032123	CG3811	Oatp30B	0.0034573	-1	-1	-1
FBgn0004623	CG8770	Gbeta76C	0.0034529	0	0	0
FBgn0082172	CR33562	mir-8S	0.0034358	-1	-1	-1
FBgn0039860	CG1792	CG1792	0.0034318	0	0	0
FBgn0040068	CG7893	vav	0.0034316	-1	0	0
FBgn0031478	CG8814	CG8814	0.00343	0	0	0
FBgn0051536	CG31536	Cdep	0.0034269	1	1	1	In training set	BDGP
FBgn0035539	CG7447	slow	0.003425	1	1	1	In training set	BDGP
FBgn0023518	CG3848	trr	0.0034232	-1	-1	0
FBgn0040532	CG8369	CG8369	0.0034228	-1	-1	-1
FBgn0003938	CR32908	snRNA:U5:63BC	0.0034206	-1	-1	-1
FBgn0011785	CG31132	BRWD3	0.0034185	-1	-1	-1
FBgn0036837	CG18135	CG18135	0.003408	0	0	0
FBgn0052428	CG32428	CG32428	0.0034017	-1	0	0
FBgn0001138	CG9656	grn	0.003397	-1	-1	0
FBgn0030691	CG8959	CG8959	0.0033919	-1	-1	-1
FBgn0014092	CG4278	CG4278	0.0033916	0	0	0
FBgn0030301	CG1745	HP5	0.0033913	-1	-1	-1
FBgn0046815	CR33018	mir-8	0.0033909	-1	-1	-1
FBgn0086446	CG17347	l(2)37Ce	0.0033865	-1	-1	-1
FBgn0052740	CR32740	tRNA:CR32740	0.0033849	-1	-1	-1
FBgn0030006	CG17982	CG17982	0.0033818	-1	-1	-1
FBgn0034057	CG8314	CG8314	0.0033793	0	0	0
FBgn0029789	CG3160	CG3160	0.0033661	-1	-1	-1
FBgn0000579	CG17654	Eno	0.0033655	-1	-1	-1
FBgn0086704	CG31006	stops	0.0033648	-1	-1	-1
FBgn0053113	CG33113	Rtnl1	0.0033639	0	0	0
FBgn0028519	CG4500	CG4500	0.0033605	-1	-1	-1
FBgn0038617	CG12333	CG12333	0.0033559	-1	-1	0
FBgn0029979	CG10777	CG10777	0.003351	-1	-1	-1
FBgn0029093	CG1548	cathD	0.0033486	-1	0	-1
FBgn0035159	CG13896	CG13896	0.0033484	-1	-1	-1
FBgn0039352	CG5053	RASSF8	0.0033482	0	0	0
FBgn0038808	CG5417	Srp14	0.0033329	-1	-1	-1
FBgn0052027	CG32027	CG32027	0.0033306	0	0	0
FBgn0002629	CG6099	m4	0.0033293	-1	-1	-1
FBgn0003510	CG17957	Sry-alpha	0.0033282	0	0	0
FBgn0033913	CG8468	CG8468	0.0033266	0	0	0
FBgn0032138	CG4364	CG4364	0.0033263	-1	0	0
FBgn0024179	CG10776	wit	0.0033193	0	0	0
FBgn0034367	CG5341	sec6	0.0033174	0	0	0
FBgn0026059	CG31045	Mhcl	0.0033148	-1	1	1	Yes	BDGP
FBgn0029823	CG3011	CG3011	0.0033083	0	0	0
FBgn0024196	CG10751	robl	0.0033078	-1	-1	-1
FBgn0000658	CG10917	fj	0.0033025	0	0	0
FBgn0028373	CG1448	inx3	0.0033018	0	0	0
FBgn0036258	CG5642	CG5642	0.0032992	0	0	0
FBgn0050387	CG42672	CG42672	0.0032949	-1	-1	-1
FBgn0033661	CG13185	CG13185	0.0032851	-1	0	0
FBgn0033507	CG12909	CG12909	0.0032846	-1	0	0
FBgn0051323	CG31323	CG31323	0.0032817	0	0	0
FBgn0005775	CG7503	Con	0.0032775	-1	-1	-1
FBgn0010434	CG11949	cora	0.0032675	0	0	0
FBgn0010531	CG17753	CCS	0.0032641	-1	-1	-1
FBgn0040080	CG5692	raps	0.0032604	0	0	0
FBgn0051251	CG31251	CG31251	0.0032589	-1	-1	-1
FBgn0026179	CG32434	siz	0.0032551	-1	-1	-1
FBgn0053715	CG42768	Msp-300	0.0032528	0	0	-1
FBgn0051423	CG31423	Ir94c	0.0032517	-1	-1	-1
FBgn0032725	CG10679	Nedd8	0.0032509	-1	-1	0
FBgn0030584	CG14407	CG14407	0.0032501	0	0	0
FBgn0000171	CG9748	bel	0.0032378	0	0	0
FBgn0034267	CG4984	CG4984	0.0032329	0	0	0
FBgn0037636	CG9821	CG9821	0.0032309	0	0	0
FBgn0038951	CG5380	CG5380	0.0032279	0	0	0
FBgn0029897	CG3203	RpL17	0.0032159	0	0	0
FBgn0051600	CG31600	CG31600	0.0032034	-1	-1	-1
FBgn0031909	CG5181	CG5181	0.0031963	-1	-1	-1
FBgn0034266	CG4975	CG4975	0.0031924	-1	-1	-1
FBgn0038652	CG7720	CG7720	0.0031916	0	0	0
FBgn0003313	CG4922	sala	0.0031915	0	0	0
FBgn0052845	CG32845	CG32845	0.0031894	-1	-1	-1
FBgn0003896	CG10619	tup	0.003187	0	0	0
FBgn0010194	CG6407	Wnt5	0.0031835	-1	-1	-1
FBgn0026088	CG14818	CG14818	0.0031824	-1	-1	-1
FBgn0250911	CG42245	CG42245	0.0031747	-1	-1	-1
FBgn0035357	CG1244	MEP-1	0.0031747	-1	-1	-1
FBgn0034753	CG2852	CG2852	0.0031721	-1	-1	-1
FBgn0004179	CG6395	Csp	0.0031704	-1	-1	-1
FBgn0000986	CG2637	Fs(2)Ket	0.0031703	-1	-1	-1
FBgn0029155	CG5889	Mdh	0.0031668	0	0	0
FBgn0037358	CG2185	elm	0.0031662	-1	-1	-1
FBgn0005677	CG4952	dac	0.0031639	0	0	0
FBgn0037741	CG16908	CG16908	0.0031612	-1	-1	-1
FBgn0015371	CG11798	chn	0.0031608	-1	-1	-1
FBgn0024556	CG6050	EfTuM	0.0031604	-1	-1	-1
FBgn0065064	CR33754	snoRNA:Psi28S-291	0.0031589	-1	-1	-1
FBgn0040296	CG3396	Ocho	0.0031564	0	0	0
FBgn0028341	CG32697	l(1)G0232	0.0031525	-1	-1	-1
FBgn0031376	CG10908	Der-1	0.0031505	-1	-1	0
FBgn0036406	CG13484	CG13484	0.0031479	-1	-1	-1
FBgn0039167	CG17786	CG17786	0.0031454	0	0	0
FBgn0051321	CG31321	CG31321	0.0031454	0	0	0
FBgn0038072	CG6225	CG6225	0.0031417	0	0	0
FBgn0015031	CG14028	cype	0.0031372	-1	-1	-1
FBgn0003353	CG3182	sei	0.0031358	-1	-1	-1
FBgn0030748	CG4394	Traf-like	0.0031326	0	0	0
FBgn0003410	CG9949	sina	0.0031317	0	0	0
FBgn0037199	CG11137	CG11137	0.0031315	0	0	0
FBgn0037135	CG7414	CG7414	0.0031228	0	0	0
FBgn0010223	CG12232	Galpha73B	0.0031222	-1	-1	-1
FBgn0035541	CG15019	CG15019	0.0031159	-1	-1	-1
FBgn0036629	CG4573	CG4573	0.003115	-1	-1	-1
FBgn0000412	CG9745	D1	0.0031141	-1	-1	-1
FBgn0039462	CG14252	CG14252	0.0031113	-1	-1	-1
FBgn0031904	CG5149	CG5149	0.0031025	0	0	0
FBgn0035643	CG13287	CG13287	0.003098	-1	-1	0
FBgn0083036	CR34573	snoRNA:Psi18S-525c	0.0030969	-1	-1	-1
FBgn0001180	CG9786	hb	0.0030966	0	0	0
FBgn0259211	CG42311	grh	0.0030955	-1	-1	-1
FBgn0027779	CG17332	VhaSFD	0.0030944	0	0	0
FBgn0082923	CR34617	snoRNA:Or-aca3	0.0030907	-1	-1	-1
FBgn0085412	CG34383	CG34383	0.0030894	-1	-1	-1
FBgn0036389	CG9028	ssp2	0.0030882	0	0	0
FBgn0037009	CG5104	CG5104	0.0030866	-1	-1	-1
FBgn0011768	CG6598	Fdh	0.0030815	0	0	0
FBgn0027539	CG5807	CG5807	0.0030737	-1	-1	-1
FBgn0062413	CG3977	Ctr1A	0.0030734	-1	-1	-1
FBgn0004432	CG9916	Cyp1	0.0030725	-1	0	0
FBgn0014018	CG11992	Rel	0.0030698	-1	0	0
FBgn0083124	CR42451	Uhg4	0.003069	-1	-1	-1
FBgn0043791	CG8147	CG8147	0.00306	-1	-1	0
FBgn0015229	CG6575	glec	0.0030584	-1	-1	-1
FBgn0030842	CG8557	CG8557	0.0030559	-1	-1	-1
FBgn0036062	CG6685	CG6685	0.0030543	-1	-1	-1
FBgn0000557	CG1873	Ef1alpha100E	0.0030417	-1	-1	-1
FBgn0085369	CG34340	CG34340	0.0030408	-1	-1	-1
FBgn0017558	CG8808	Pdk	0.0030407	-1	-1	-1
FBgn0260932	CG13190	cuff	0.00304	-1	-1	-1
FBgn0024244	CG10016	drm	0.0030352	0	0	0
FBgn0000370	CG8669	crc	0.0030343	0	0	0
FBgn0034265	CG6410	CG6410	0.0030278	0	0	0
FBgn0023212	CG4204	Elongin-B	0.0030266	-1	0	0
FBgn0036136	CG6233	Ufd1-like	0.0030233	0	0	0
FBgn0045759	CG18647	bin	0.0030216	-1	-1	-1
FBgn0063485	CG3849	Lasp	0.0030207	-1	-1	0
FBgn0034614	CG9752	CG9752	0.00302	-1	-1	-1
FBgn0051360	CG31360	CG31360	0.0030191	-1	-1	-1
FBgn0031360	CG31937	CG31937	0.003011	-1	-1	-1
FBgn0259736	CG42390	CG42390	0.0030094	-1	-1	-1
FBgn0021764	CG5227	sdk	0.0030079	-1	-1	-1
FBgn0026083	CG4857	CG4857	0.0030046	0	0	0
FBgn0030451	CG15717	CG15717	0.0030019	-1	0	0
FBgn0037200	CG11109	CG11109	0.002995	0	0	0
FBgn0034736	CG6018	CG6018	0.0029944	-1	-1	-1
FBgn0082981	CR34525	snoRNA:Psi28S-2949	0.0029934	-1	-1	-1
FBgn0033216	CG1946	CG1946	0.0029839	-1	-1	-1
FBgn0014455	CG11654	Ahcy13	0.0029836	-1	0	0
FBgn0026562	CG6378	BM-40-SPARC	0.0029803	0	0	0
FBgn0086443	CG10687	Aats-asn	0.0029795	-1	-1	-1
FBgn0037470	CG1091	CG1091	0.0029786	-1	0	0
FBgn0037877	CG6689	CG6689	0.0029761	-1	-1	1	Yes	BDGP
FBgn0037359	CG1245	MED27	0.002974	0	0	0
FBgn0085438	CG34409	CG34409	0.0029685	-1	-1	-1
FBgn0004587	CG10851	B52	0.0029664	0	0	0
FBgn0027560	CG4104	Tps1	0.0029656	0	0	0
FBgn0033088	CG3271	CG3271	0.0029655	-1	-1	-1
FBgn0026080	CG6121	Tip60	0.0029641	-1	-1	-1
FBgn0035229	CG7852	CG7852	0.0029636	-1	-1	-1
FBgn0010348	CG8385	Arf79F	0.0029634	-1	-1	0
FBgn0022382	CG15862	Pka-R2	0.0029605	-1	-1	0
FBgn0027066	CG3265	Eb1	0.0029564	-1	0	0
FBgn0027621	CG3400	Pfrx	0.0029526	-1	0	0
FBgn0046114	CG4919	Gclm	0.0029489	0	0	0
FBgn0024989	CG3777	CG3777	0.0029446	0	0	0
FBgn0085425	CG34396	CG34396	0.0029426	-1	-1	-1
FBgn0040285	CG9195	Scamp	0.0029367	-1	-1	-1
FBgn0042111	CG18766	CG18766	0.0029338	-1	0	0
FBgn0029834	CG5937	CG5937	0.0029335	-1	-1	-1
FBgn0004864	CG1594	hop	0.0029303	-1	-1	-1
FBgn0031681	CG31651	pgant5	0.0029198	-1	-1	0
FBgn0029885	CG3224	CG3224	0.0029198	-1	0	0
FBgn0033189	CG2140	Cyt-b5	0.0029183	-1	0	0
FBgn0026404	CG8091	Nc	0.0029134	-1	-1	0
FBgn0035768	CG14834	CG14834	0.0029027	0	0	0
FBgn0022201	CG13777	milt	0.0029016	-1	0	0
FBgn0085221	CG34192	CG34192	0.0029011	-1	-1	-1
FBgn0036730	CG13732	qjt	0.0028991	-1	-1	-1
FBgn0052595	CG32595	CG32595	0.0028971	-1	-1	-1
FBgn0011476	CG14865	l(3)neo43	0.002897	-1	-1	-1
FBgn0031418	CG3609	CG3609	0.0028893	-1	-1	-1
FBgn0038320	CG4931	Sra-1	0.0028861	-1	-1	-1
FBgn0031419	CG15390	CG15390	0.0028762	0	0	0
FBgn0013269	CG6226	FK506-bp1	0.0028761	-1	0	0
FBgn0082997	CR34592	snoRNA:Psi28S-1232	0.0028733	-1	-1	-1
FBgn0030695	CG8995	PGRP-LE	0.002864	0	0	0
FBgn0033347	CG8248	CG8248	0.0028602	0	0	0
FBgn0029092	CG11804	ced-6	0.0028565	0	0	0
FBgn0050403	CG30403	CG30403	0.0028564	0	0	0
FBgn0037156	CG11523	CG11523	0.0028543	-1	0	0
FBgn0052099	CG32099	eap	0.0028521	0	0	0
FBgn0039126	CG13601	CG13601	0.0028518	0	0	0
FBgn0041606	CR31863	bft	0.0028503	-1	-1	-1
FBgn0034360	CG10927	CG10927	0.0028465	0	0	0
FBgn0002121	CG2671	l(2)gl	0.0028386	0	0	0
FBgn0013770	CG6692	Cp1	0.0028358	-1	-1	-1
FBgn0034569	CG3221	dgt3	0.0028257	-1	-1	-1
FBgn0004656	CG2252	fs(1)h	0.0028245	0	0	0
FBgn0011817	CG7892	nmo	0.0028221	0	0	0
FBgn0024754	CG8200	Flo	0.0028221	0	0	0
FBgn0020379	CG6312	Rfx	0.0028146	-1	-1	0
FBgn0016059	CG6446	Sema-1b	0.0028143	-1	-1	-1
FBgn0027359	CG1728	Tim8	0.0028141	-1	-1	-1
FBgn0038150	CG17045	yellow-e3	0.0028119	0	0	0
FBgn0259174	CG42279	Nedd4	0.0028114	-1	-1	-1
FBgn0030704	CG15916	CG15916	0.0028088	0	0	0
FBgn0053937	CG33937	CG33937	0.0028078	-1	-1	-1
FBgn0040465	CG12767	Dip3	0.0027992	-1	0	0
FBgn0026060	CG4317	Mipp2	0.0027956	0	0	0
FBgn0046247	CG5938	CG5938	0.0027937	-1	-1	-1
FBgn0083986	CG34150	CG34150	0.0027842	-1	-1	0
FBgn0028991	CG32904	seq	0.0027793	-1	-1	-1
FBgn0040340	CG11642	TRAM	0.002778	0	0	0
FBgn0003204	CG1799	ras	0.0027735	-1	-1	-1
FBgn0036735	CG6311	Edc3	0.0027699	-1	-1	-1
FBgn0028471	CG5720	CG5720	0.0027688	-1	-1	0
FBgn0036478	CG6854	CG6854	0.0027673	0	0	0
FBgn0036272	CG4300	CG4300	0.0027662	-1	0	0
FBgn0031282	CG3639	pex12	0.0027632	-1	-1	-1
FBgn0022768	CG2984	Pp2C1	0.0027619	-1	-1	-1
FBgn0015663	CG2788	Dot	0.0027606	0	0	0
FBgn0030215	CG15296	CG15296	0.00276	0	0	0
FBgn0034008	CG8152	CG8152	0.0027553	0	0	0
FBgn0039147	CG10694	CG10694	0.0027524	0	0	0
FBgn0031663	CG8891	CG8891	0.0027499	0	0	0
FBgn0028878	CG15269	CG15269	0.0027495	-1	-1	-1
FBgn0035228	CG12091	CG12091	0.0027454	-1	0	0
FBgn0034214	CG6550	CG6550	0.0027447	0	0	0
FBgn0039868	CG11563	CG11563	0.0027427	-1	-1	-1
FBgn0086359	CG3953	Invadolysin	0.0027424	-1	-1	-1
FBgn0031673	CG31650	CG31650	0.0027392	-1	-1	1	Yes	BDGP
FBgn0010238	CG12369	Lac	0.0027382	0	0	0
FBgn0020303	CG10746	fok	0.0027329	0	0	0
FBgn0003514	CG3595	sqh	0.0027285	0	0	0
FBgn0031905	CG5155	CG5155	0.0027211	-1	-1	-1
FBgn0030510	CG12177	CG12177	0.0027208	-1	0	0
FBgn0025373	CG12389	Fpps	0.0027186	-1	-1	-1
FBgn0025874	CG8474	Meics	0.0027183	-1	-1	0
FBgn0038385	CG4221	CG4221	0.0027181	0	0	0
FBgn0031281	CG3883	Saf6	0.0027092	0	0	0
FBgn0015245	CG12101	Hsp60	0.0027073	-1	0	0
FBgn0037912	CG6782	sea	0.0027068	-1	-1	-1
FBgn0036340	CG11274	SRm160	0.0027059	-1	-1	-1
FBgn0023524	CG3078	CG3078	0.0027047	-1	-1	-1
FBgn0039666	CG11501	CG11501	0.0027035	0	0	0
FBgn0052638	CG32638	CG32638	0.0027013	-1	-1	-1
FBgn0052554	CG32554	CG32554	0.0026988	-1	-1	-1
FBgn0004052	CG17962	Z600	0.0026955	-1	-1	0
FBgn0030316	CG11695	CG11695	0.0026896	-1	-1	-1
FBgn0029939	CG9650	CG9650	0.0026856	-1	-1	0
FBgn0082989	CR34613	snoRNA:Psi28S-2442a	0.0026852	-1	-1	-1
FBgn0038286	CG6966	CG6966	0.002683	-1	-1	-1
FBgn0086672	CR33637	snoRNA:Or-aca5	0.0026762	-1	-1	-1
FBgn0004611	CG4574	Plc21C	0.0026743	-1	-1	-1
FBgn0035440	CG14969	CG14969	0.0026693	-1	-1	-1
FBgn0032880	CG9318	CG9318	0.002669	-1	0	0
FBgn0031288	CG13949	CG13949	0.0026662	0	0	0
FBgn0050010	CG30010	CG30010	0.0026653	0	0	0
FBgn0039867	CG2261	CstF-50	0.0026632	0	0	0
FBgn0032222	CG5037	CG5037	0.0026619	-1	0	0
FBgn0033087	CG3194	CG3194	0.0026604	-1	-1	-1
FBgn0051232	CG31232	koko	0.0026595	0	0	0
FBgn0034261	CG4966	HPS4	0.0026537	0	0	0
FBgn0065101	CR33657	snmRNA:204	0.0026519	-1	-1	-1
FBgn0010113	CG15532	hdc	0.0026474	-1	-1	-1
FBgn0053703	CG33703	CG33703	0.002644	-1	-1	-1
FBgn0003430	CG16738	slp1	0.0026396	0	0	0
FBgn0035831	CG8038	CG8038	0.0026253	-1	-1	-1
FBgn0036875	CG9449	CG9449	0.0026211	0	0	0
FBgn0038034	CR17875	Cyp9f3Psi	0.0026125	0	0	0
FBgn0029594	CG14806	CG14806	0.0026123	0	0	0
FBgn0039357	CG4743	CG4743	0.0026119	-1	-1	-1
FBgn0033855	CG13333	CG13333	0.0026115	0	0	0
FBgn0065073	CR33684	snoRNA:229	0.0026075	-1	-1	-1
FBgn0031682	CG5828	CG5828	0.0026073	0	0	0
FBgn0032596	CG17331	CG17331	0.0026053	-1	-1	-1
FBgn0039118	CG10208	CG10208	0.0026031	0	0	0
FBgn0004237	CG12749	Hrb87F	0.0026026	-1	-1	-1
FBgn0028420	CG18783	Kr-h1	0.0025954	0	0	0
FBgn0034215	CG4802	CG4802	0.0025933	-1	-1	-1
FBgn0032629	CG15138	beat-IIIc	0.0025912	0	0	0
FBgn0053635	CG33635	CG33635	0.0025889	-1	-1	-1
FBgn0052069	CG32069	CG32069	0.0025888	-1	-1	-1
FBgn0086021	CR34650	snoRNA:MeU6-C68	0.002587	-1	-1	-1
FBgn0028743	CG5036	CG5036	0.0025867	-1	-1	-1
FBgn0028371	CG30092	jbug	0.0025816	0	0	0
FBgn0029843	CG5905	Nep1	0.0025776	0	0	0
FBgn0004102	CG12154	oc	0.0025701	-1	-1	0
FBgn0004862	CG7902	bap	0.0025662	-1	0	1	Yes	New BDGP
FBgn0033247	CG8722	Nup44A	0.0025646	-1	-1	0
FBgn0052000	CG32000	CG32000	0.0025629	0	0	0
FBgn0031190	CG12576	CG12576	0.0025595	-1	0	0
FBgn0035348	CG16758	CG16758	0.0025493	-1	-1	-1
FBgn0037023	CG3698	CG3698	0.0025479	0	0	0
FBgn0036337	CG11255	CG11255	0.002541	-1	0	0
FBgn0050036	CG30036	CG30036	0.0025409	-1	-1	-1
FBgn0039002	CG17625	CG17625	0.0025408	-1	-1	-1
FBgn0004145	CG3161	Vha16	0.0025369	-1	-1	-1
FBgn0032847	CG10756	Taf13	0.0025366	0	0	0
FBgn0028509	CG31811	cenG1A	0.0025339	0	0	0
FBgn0016930	CG4551	smi35A	0.0025325	-1	1	1	Yes	BDGP
FBgn0037792	CG6241	CG6241	0.0025227	-1	-1	-1
FBgn0034723	CG13506	CG13506	0.0025191	0	0	0
FBgn0020440	CG10023	Fak56D	0.002517	0	0	0
FBgn0015282	CG5289	Pros26.4	0.0025161	0	0	0
FBgn0032034	CG17295	Rcd4	0.0025151	-1	-1	-1
FBgn0040388	CG32796	boi	0.0025139	0	0	0
FBgn0052066	CG32066	CG32066	0.0025115	-1	0	0
FBgn0010269	CG15793	Dsor1	0.0025112	0	0	0
FBgn0082988	CR34612	snoRNA:Psi28S-2442b	0.002506	-1	-1	-1
FBgn0034033	CG8204	CG8204	0.0025047	-1	-1	-1
FBgn0012051	CG7563	CalpA	0.0025028	0	0	0
FBgn0039908	CG11533	Asator	0.0025005	-1	-1	-1
FBgn0033616	CG7745	CG7745	0.0024975	0	0	0
FBgn0032033	CG13392	CG13392	0.0024802	-1	-1	-1
FBgn0033129	CG12844	Tsp42Eh	0.0024791	0	0	0
FBgn0052803	CG32803	CG32803	0.0024588	-1	-1	-1
FBgn0000261	CG6871	Cat	0.0024567	-1	0	0
FBgn0001257	CG15009	ImpL2	0.0024557	0	0	0
FBgn0032042	CG13398	CG13398	0.0024545	0	0	0
FBgn0004401	CG6143	Pep	0.0024532	-1	-1	-1
FBgn0003044	CG5109	Pcl	0.0024499	-1	0	0
FBgn0017545	CG2168	RpS3A	0.0024479	0	0	0
FBgn0031081	CG9565	Nep3	0.0024462	-1	-1	-1
FBgn0004854	CG5488	B-H2	0.0024374	-1	-1	0
FBgn0016126	CG1495	CaMKI	0.0024354	-1	-1	-1
FBgn0022893	CG2207	Df31	0.0024337	0	0	0
FBgn0028426	CG3298	JhI-1	0.0024309	-1	-1	-1
FBgn0025360	CG18455	Optix	0.0024301	0	0	0
FBgn0037582	CG7331	Atg13	0.0024295	-1	-1	0
FBgn0032848	CG10722	CG10722	0.0024258	0	0	0
FBgn0011766	CG6376	E2f	0.0024252	0	0	0
FBgn0051915	CG31915	CG31915	0.0024193	-1	-1	-1
FBgn0003401	CG4735	shu	0.0024181	0	0	0
FBgn0011241	CG10536	cbx	0.0024157	0	0	0
FBgn0004066	CG3422	Pros28.1	0.0024103	-1	0	0
FBgn0040207	CG13956	kat80	0.0024096	-1	-1	0
FBgn0029931	CG14427	CG14427	0.0024044	0	0	0
FBgn0033459	CG12744	CG12744	0.002404	-1	0	0
FBgn0052676	CG32676	CG32676	0.0024038	-1	-1	-1
FBgn0038981	CG5346	CG5346	0.0024013	-1	-1	1	Yes	BDGP
FBgn0085428	CG34399	Nox	0.0024012	-1	-1	-1
FBgn0002561	CG3839	l(1)sc	0.0023977	0	0	0
FBgn0031209	CG2657	Ir21a	0.0023969	-1	-1	-1
FBgn0020251	CG8339	sfl	0.0023949	-1	-1	-1
FBgn0013342	CG17248	n-syb	0.0023895	-1	-1	-1
FBgn0040273	CG7626	Spt5	0.0023891	0	0	0
FBgn0039128	CG13599	CG13599	0.002387	0	0	0
FBgn0004698	CG8153	mus210	0.0023804	-1	0	0
FBgn0031374	CG7337	CG7337	0.0023802	0	0	0
FBgn0031675	CG9121	CG9121	0.0023727	-1	-1	-1
FBgn0039914	CG1901	mav	0.0023725	-1	-1	-1
FBgn0032871	CG2611	CG2611	0.0023651	0	0	0
FBgn0030742	CG9919	CG9919	0.0023629	-1	-1	-1
FBgn0013343	CG31136	Syx1A	0.0023598	0	0	0
FBgn0039358	CG5028	CG5028	0.0023565	-1	-1	-1
FBgn0030466	CG15744	CG15744	0.0023558	-1	-1	-1
FBgn0029850	CG14446	CG14446	0.0023545	-1	-1	-1
FBgn0010039	CG4381	GstD3	0.0023495	-1	-1	-1
FBgn0004655	CG3707	wapl	0.0023492	-1	-1	-1
FBgn0052225	CG32225	CG32225	0.0023484	-1	-1	-1
FBgn0041604	CG32146	dlp	0.0023467	-1	1	1	Yes	BDGP
FBgn0027356	CG8604	Amph	0.0023456	0	0	0
FBgn0000618	CG15191	e(y)2	0.0023453	-1	-1	-1
FBgn0031420	CG9866	CG9866	0.0023452	-1	0	0
FBgn0043362	CG14001	bchs	0.0023435	-1	-1	-1
FBgn0030407	CG2543	CG2543	0.0023411	-1	-1	-1
FBgn0002633	CG8361	HLHm7	0.002339	-1	-1	-1
FBgn0086057	CR34686	snoRNA:Me28S-G2017	0.0023332	-1	-1	-1
FBgn0039145	CG6000	CG6000	0.0023305	0	0	0
FBgn0082928	CR34526	snoRNA:Me28S-G3255a	0.0023273	-1	-1	-1
FBgn0030703	CG9066	MSBP	0.002327	0	0	0
FBgn0040890	CG14199	CG14199	0.002323	-1	-1	-1
FBgn0036273	CG10426	CG10426	0.0023228	0	0	0
FBgn0065076	CR33930	snoRNA:185	0.0023199	-1	-1	-1
FBgn0031677	CG14036	CG14036	0.0023162	0	0	0
FBgn0024329	CG7717	Mekk1	0.002316	-1	-1	-1
FBgn0003254	CG7230	rib	0.0023134	0	0	0
FBgn0031022	CG12204	CG12204	0.0023127	0	0	0
FBgn0038195	CG3061	CG3061	0.0023078	0	0	0
FBgn0031362	CG17646	CG17646	0.0023049	0	0	0
FBgn0010222	CG18466	Nmdmc	0.0023031	0	0	0
FBgn0031149	CG1518	CG1518	0.0023026	-1	-1	-1
FBgn0001989	CG13240	l(2)35Di	0.0023011	-1	-1	0
FBgn0029927	CG14430	bou	0.0023006	-1	0	0
FBgn0003731	CG10079	Egfr	0.0022972	0	0	0
FBgn0002735	CG8333	HLHmgamma	0.0022942	-1	-1	-1
FBgn0010355	CG17603	Taf1	0.002294	-1	-1	-1
FBgn0052801	CG32801	CG32801	0.0022937	-1	-1	-1
FBgn0046687	CG3171	Tre1	0.0022935	-1	0	0
FBgn0002174	CG5504	l(2)tid	0.0022931	-1	0	0
FBgn0004394	CG12287	pdm2	0.0022879	0	0	0
FBgn0011848	CR30453	tRNA:E4:56Fa	0.0022877	-1	-1	-1
FBgn0050454	CR30454	tRNA:CR30454	0.0022871	-1	-1	-1
FBgn0051641	CG31641	stai	0.0022836	-1	-1	-1
FBgn0003062	CG9888	Fib	0.0022804	-1	-1	-1
FBgn0003270	CG10393	amos	0.0022764	-1	-1	-1
FBgn0035034	CG3565	CG3565	0.0022737	0	0	0
FBgn0037328	CG2099	RpL35A	0.0022705	0	0	0
FBgn0025676	CG3217	CkIIalpha-i3	0.0022696	-1	-1	-1
FBgn0004009	CG4889	wg	0.0022644	1	1	1	In training set	BDGP
FBgn0038533	CG7523	CG7523	0.0022643	-1	-1	-1
FBgn0052829	CG32829	CG32829	0.0022625	-1	-1	-1
FBgn0037475	CG33323	Fer1	0.0022612	0	0	0
FBgn0015946	CG4345	grim	0.0022572	0	0	0
FBgn0037670	CG8436	CG8436	0.0022538	-1	0	0
FBgn0032221	CG5375	CG5375	0.0022508	-1	-1	-1
FBgn0050220	CR30220	tRNA:CR30220	0.0022481	-1	-1	-1
FBgn0039264	CG11786	CG11786	0.0022479	0	0	0
FBgn0024939	CG1263	RpL8	0.0022443	0	0	0
FBgn0083013	CR34591	snoRNA:Psi28S-1060	0.0022424	-1	-1	-1
FBgn0087041	CG42231	CG42231	0.0022392	-1	-1	-1
FBgn0027378	CG6363	MRG15	0.0022383	0	0	0
FBgn0011849	CR30455	tRNA:E4:56Fb	0.0022353	-1	-1	-1
FBgn0026162	CR31490	tRNA:K5:84ABd	0.0022229	-1	-1	-1
FBgn0037024	CG4365	CG4365	0.0022207	0	0	0
FBgn0032681	CG10283	CG10283	0.0022147	0	0	0
FBgn0052138	CG32138	CG32138	0.0022128	0	0	0
FBgn0037549	CG7878	CG7878	0.0022094	0	0	0
FBgn0035959	CG4911	CG4911	0.0022093	0	0	0
FBgn0026206	CG12218	mei-P26	0.0022038	0	0	0
FBgn0011818	CG9884	oaf	0.0022019	-1	0	0
FBgn0023477	CG2827	Tal	0.0021999	-1	1	1	Yes	BDGP
FBgn0031344	CG7420	CG7420	0.0021907	0	0	0
FBgn0032135	CG3881	GlcAT-S	0.0021862	0	0	0
FBgn0052104	CG32104	CG32104	0.002186	-1	-1	-1
FBgn0034418	CG15118	CG15118	0.0021837	0	0	0
FBgn0035267	CG13921	CG13921	0.00218	0	0	0
FBgn0012025	CR31433	tRNA:Y1:85Ab	0.0021783	-1	-1	-1
FBgn0033717	CG8839	CG8839	0.0021778	0	0	0
FBgn0050449	CR30449	tRNA:CR30449	0.0021774	-1	-1	-1
FBgn0041707	CG1168	7B2	0.0021749	-1	-1	0
FBgn0038065	CG6359	CG6359	0.0021743	-1	-1	-1
FBgn0030406	CG1463	CG1463	0.0021658	-1	0	1	Yes	New BDGP
FBgn0001204	CG9768	hkb	0.0021626	0	0	0
FBgn0005671	CG17369	Vha55	0.0021624	0	0	0
FBgn0037134	CG7407	CG7407	0.0021616	0	0	0
FBgn0012024	CR31435	tRNA:Y1:85Aa	0.0021613	-1	-1	-1
FBgn0038079	CG14394	CG14394	0.0021612	-1	-1	-1
FBgn0037744	CG8417	CG8417	0.0021594	0	0	-1
FBgn0031693	CG14032	Cyp4ac1	0.0021587	0	0	0
FBgn0031020	CG12202	Nat1	0.0021579	-1	-1	-1
FBgn0033458	CG18446	CG18446	0.0021569	-1	0	0
FBgn0260441	CG11271	RpS12	0.0021569	-1	-1	-1
FBgn0086662	CR33709	snoRNA:Psi28S-3186	0.002153	-1	-1	-1
FBgn0031575	CG3980	Cep97	0.0021472	-1	-1	-1
FBgn0052372	CG32372	CG32372	0.0021453	0	0	0
FBgn0012026	CR31434	tRNA:Y1:85Ac	0.002145	-1	-1	-1
FBgn0000064	CG6058	Ald	0.0021448	-1	-1	-1
FBgn0050234	CR30234	tRNA:CR30234	0.0021406	-1	-1	-1
FBgn0011962	CR31585	tRNA:R2:84Fd	0.0021397	-1	-1	-1
FBgn0011983	CR32609	tRNA:S7:12Eg	0.002135	-1	-1	-1
FBgn0029791	CG4096	CG4096	0.0021341	-1	-1	-1
FBgn0011963	CR31584	tRNA:R2:84Fe	0.0021328	-1	-1	-1
FBgn0033550	CG12341	CG12341	0.0021295	0	0	0
FBgn0027375	CG4879	RecQ5	0.0021221	-1	-1	-1
FBgn0044511	CG32854	mRpS21	0.0021199	-1	-1	-1
FBgn0011725	CG31137	twin	0.0021195	-1	-1	-1
FBgn0004110	CG7895	tin	0.002119	1	1	1	In training set	BDGP
FBgn0024362	CG11412	CG11412	0.0021172	0	0	0
FBgn0011961	CR31582	tRNA:R2:84Fc	0.0021151	-1	-1	-1
FBgn0035483	CG1134	CG1134	0.0021081	0	0	0
FBgn0086668	CR33751	snoRNA:Psi28S-3436a	0.0021067	-1	-1	-1
FBgn0065048	CR33921	snoRNA:U3:54Aa	0.0021037	-1	-1	-1
FBgn0050235	CR30235	tRNA:CR30235	0.002102	-1	-1	-1
FBgn0045852	CG31753	ham	0.0021013	-1	-1	-1
FBgn0025525	CG9102	bab2	0.0020982	-1	-1	-1
FBgn0037315	CG16708	Cerk	0.0020969	0	0	0
FBgn0027094	CG13391	Aats-ala	0.0020965	-1	0	0
FBgn0011960	CR31566	tRNA:R2:84Fb	0.002093	-1	-1	-1
FBgn0260866	CG12489	dnr1	0.0020918	-1	-1	-1
FBgn0031283	CG15880	CG15880	0.0020894	-1	-1	-1
FBgn0051320	CG31320	CG31320	0.0020886	0	0	0
FBgn0032976	CG42748	CG42748	0.0020864	0	0	0
FBgn0028380	CG9670	fal	0.0020861	0	0	0
FBgn0031573	CG3407	CG3407	0.0020857	-1	-1	0
FBgn0032150	CG13123	CG13123	0.0020845	0	0	0
FBgn0015542	CG7951	sima	0.002084	-1	-1	0
FBgn0015903	CG5393	apt	0.0020824	-1	0	0
FBgn0260724	CG42551	larp	0.0020793	-1	-1	-1
FBgn0023514	CG14805	CG14805	0.0020786	-1	0	0
FBgn0010583	CG3727	dock	0.002077	-1	0	0
FBgn0030796	CG4829	CG4829	0.0020767	1	1	1	In training set	BDGP
FBgn0026163	CR31487	tRNA:K5:84ABc	0.0020766	-1	-1	-1
FBgn0000077	CG12127	amx	0.002076	-1	-1	0
FBgn0028708	CG11993	Mst85C	0.0020753	-1	-1	-1
FBgn0011959	CR31581	tRNA:R2:84Fa	0.0020742	-1	-1	-1
FBgn0014380	CG9366	RhoL	0.0020734	0	0	0
FBgn0034392	CG15094	CG15094	0.0020696	0	0	0
FBgn0052298	CG32298	CG32298	0.0020679	-1	-1	0
FBgn0037669	CG9740	CG9740	0.0020671	-1	0	0
FBgn0260941	CG42318	app	0.0020671	-1	-1	-1
FBgn0086674	CG32632	Tango13	0.0020646	-1	-1	-1
FBgn0014141	CG3937	cher	0.0020625	-1	-1	-1
FBgn0067711	CR33595	mir-281aS	0.0020619	-1	-1	-1
FBgn0043884	CG33106	mask	0.0020601	-1	0	0
FBgn0034761	CG4250	CG4250	0.0020594	-1	-1	-1
FBgn0039861	CG1800	pasha	0.0020586	-1	-1	-1
FBgn0032597	CG17904	CG17904	0.0020579	-1	-1	-1
FBgn0053452	CR33452	5SrRNA:CR33452	0.0020501	-1	-1	-1
FBgn0035141	CG13892	Cypl	0.0020494	0	0	0
FBgn0004002	CG42677	wb	0.0020472	-1	-1	-1
FBgn0032727	CG10623	CG10623	0.0020455	0	0	0
FBgn0051583	CR31583	tRNA:N5:84F	0.002042	-1	-1	-1
FBgn0035704	CG10144	CG10144	0.0020393	-1	-1	-1
FBgn0039163	CG5515	CG5515	0.0020339	-1	-1	-1
FBgn0011871	CR30207	tRNA:G3:57BCa	0.0020333	-1	-1	-1
FBgn0037544	CG11035	CG11035	0.0020332	0	0	0
FBgn0036291	CG10681	CG10681	0.0020299	-1	-1	0
FBgn0031041	CG12788	CG12788	0.0020295	-1	-1	0
FBgn0027358	CG17767	Tim9b	0.0020295	-1	-1	-1
FBgn0034058	CG8315	CG8315	0.002026	0	0	0
FBgn0065047	CR33628	snoRNA:U3:54Ab	0.0020225	-1	-1	-1
FBgn0050208	CR30208	tRNA:CR30208	0.0020188	-1	-1	-1
FBgn0086078	CR34707	snoRNA:Me28S-A774b	0.0020164	-1	-1	-1
FBgn0035464	CG12006	CG12006	0.0020156	-1	0	0
FBgn0051578	CR31578	tRNA:CR31578	0.0020153	-1	-1	-1
FBgn0001942	CG9075	eIF-4a	0.0020151	0	0	0
FBgn0051579	CR31579	tRNA:CR31579	0.0020134	-1	-1	-1
FBgn0044030	CG32531	mRpS14	0.0020123	-1	-1	0
FBgn0086606	CR33594	mir-281a	0.002012	-1	-1	-1
FBgn0082943	CR34527	snoRNA:Me28S-A982a	0.0020074	-1	-1	-1
FBgn0030685	CG8948	Graf	0.0020067	-1	-1	-1
FBgn0027364	CG3871	Six4	0.002006	-1	-1	-1
FBgn0035888	CG7120	CG7120	0.0020037	-1	-1	-1
FBgn0033718	CG13162	ana3	0.0020036	-1	-1	-1
FBgn0010339	CG8340	128up	0.0020028	-1	-1	-1
FBgn0011956	CR30314	tRNA:R2:42Ab	0.0020024	-1	-1	-1
FBgn0053800	CG33800	CG33800	0.0020024	-1	-1	-1
FBgn0031993	CG8486	CG8486	0.0020007	0	0	0
FBgn0034816	CG3085	CG3085	0.0019974	0	0	0
FBgn0030718	CG9172	CG9172	0.0019955	-1	0	0
FBgn0001222	CG5748	Hsf	0.0019952	0	0	0
FBgn0031498	CG17260	CG17260	0.0019943	0	0	0
FBgn0034750	CG3732	CG3732	0.0019931	-1	0	0
FBgn0024983	CG4293	CG4293	0.0019926	-1	-1	0
FBgn0011887	CR30312	tRNA:K2:42Aa	0.0019916	-1	-1	-1
FBgn0028981	CR30224	tRNA:S4:56D	0.0019893	-1	-1	-1
FBgn0026164	CR31489	tRNA:K5:84ABb	0.0019886	-1	-1	-1
FBgn0035960	CG4942	CG4942	0.0019865	-1	-1	-1
FBgn0036096	CG8003	CG8003	0.0019851	0	0	0
FBgn0013987	CG3086	MAPk-Ak2	0.0019834	-1	-1	-1
FBgn0021895	CG18426	ytr	0.0019833	-1	-1	-1
FBgn0051145	CG31145	CG31145	0.001983	0	0	0
FBgn0031286	CG3862	CG3862	0.0019822	-1	-1	-1
FBgn0026089	CG14817	CG14817	0.0019821	-1	-1	-1
FBgn0000307	CG5813	chif	0.0019806	0	0	0
FBgn0011880	CR30313	tRNA:I:42A	0.0019775	-1	-1	-1
FBgn0037911	CG10898	CG10898	0.0019735	-1	-1	-1
FBgn0030611	CG15027	CG15027	0.0019711	-1	-1	-1
FBgn0050225	CR30225	tRNA:CR30225	0.0019707	-1	-1	-1
FBgn0051568	CR31568	tRNA:CR31568	0.0019695	-1	-1	-1
FBgn0030686	CG8288	mRpL3	0.0019679	-1	-1	-1
FBgn0031977	CG7380	baf	0.0019603	-1	-1	-1
FBgn0260482	CG32599	CG32599	0.0019598	-1	-1	-1
[truncated: 11,664 more rows]
