# Supplementary material for: Predicting Spatial and Temporal Gene Expression Using an Integrative Model of Transcription Factor Occupancy and Chromatin State
Source: PLoS Comput Biol. 2012 Dec 6;8(12):e1002798. doi: 10.1371/journal.pcbi.1002798 (PMC3516547; doi:10.1371/journal.pcbi.1002798)
Supplement: Table S1 — List of all used datasets with references. (XLS) [file pcbi.1002798.s020.xls]

## Sheet: Sheet1
List of all datasets used for training the probabilistic model of spatio-temporal gene activity
as described ina the manuscript by Wilczynski, Yeo, Liu and Furlong
Dataset	Supple. Table	Pubmed ID	URL
TF occupancy on 8008 CRMs	1	19890324	http://dx.doi.org/10.1038/nature08531
Locations of all transcription start sites	2	NA	ftp://ftp.flybase.net/releases/FB2010_05/dmel_r5.28/gff/
Locations of Insulator binding from ChIP (1%fdr)	2	20084099	http://dx.plos.org/10.1371/journal.pgen.1000814
CRM activity from CAD database	3	19890324	http://dx.doi.org/10.1038/nature08531
H3K4-me3 histone marks for promoter activity from ModEncode	4	submitted	http://intermine.modencode.org/release-18/modMineSearchResults.do?searchTerm=White+AND+H3K4me3+and+EMBRYO
Gene activity from BDGP project	5	17645804	http://genomebiology.com/content/8/7/R145
New annotations of gene activity from BDGP project	6	NA	http://insitu.fruitfly.org
